# Supplementary material for: Brønsted acid-mediated tandem cyclization of triarylphosphines and in situ generated ortho-alkynyl quinone methides: access to heterocyclic quaternary phosphonium salts
Source: Royal Society of Chemistry journal article supplement (doi:10.1039/d2cc06994f), 2023-01-01

## SUPPORTING INFORMATION

### **Brønsted Acid-mediated Tandem Cyclization of Triarylphosphines and *in situ* generated *ortho*-Alkynyl Quinone Methides: Access to Heterocyclic Quaternary Phosponium Salts**

Ya-Xin Fan,<sup>‡</sup> Hong-Li Huang,<sup>‡</sup> Qing-Qiang Su, Yong-Zheng Lv, Shan Li, Yan-Hua Ma, Yan-Xin Mao, Chun-Lin Ma,<sup>\*</sup> and Ji-Yuan Du<sup>\*</sup>

College of Chemistry and Chemical Engineering, Liaocheng University, Liaocheng, Shandong 252059

### **Content**

|                                                                                                                         |    |
|-------------------------------------------------------------------------------------------------------------------------|----|
| <b>Materials, Methods, and General Remarks:</b> .....                                                                   | 2  |
| 1. Typical Procedure and Characterization for Phosponium Salt.....                                                      | 3  |
| 2. General Procedure for the Synthesis of <i>o</i> -hydroxyl-benzyl alcohol ( <i>o</i> -HBAs)                           |    |
| 3                                                                                                                       |    |
| 3. General Procedure for the Synthesis of Heterocyclic Phosponium Salts and<br>the Spectral Data of the Compounds. .... | 4  |
| 4. Relative Configuration Assignment of A and 3aa by X-Ray Crystallographic<br>Analysis: .....                          | 34 |
| 5. Deuteration of 2-benzofuranyl phosponium salts .....                                                                 | 37 |
| 6. Reference.....                                                                                                       | 41 |
| 7. Copies of NMR Spectra .....                                                                                          | 42 |

### **Materials, Methods, and General Remarks:**

All moisture or oxygen-sensitive reactions were carried out under an argon atmosphere in oven flasks. Commercially obtained reagents such as trifluoromethanesulfonic acid (TfOH), PPh<sub>3</sub>, aldehyde and phenylacetylene derivatives were used as received. The solvents used were purified by distillation over the drying agents indicated and were transferred under argon: THF (Na), CH<sub>2</sub>Cl<sub>2</sub> (CaH<sub>2</sub>), toluene (Na), ClCH<sub>2</sub>CH<sub>2</sub>Cl (CaH<sub>2</sub>). Thin-layer chromatography was performed using silica gel 60 F-254 precoated plates (0.25 mm) and was visualized by UV irradiation. The products were purified by flash column chromatography on silica gel (200-300 meshes) from the Anhui Liangchen Silicon Material Company in China. <sup>1</sup>H NMR and <sup>13</sup>C NMR spectra were recorded in CDCl<sub>3</sub> on a Varian 500 MHz instrument. <sup>31</sup>P and <sup>19</sup>F operation frequencies were 202 and 471 MHz, respectively. Chemical shifts ( $\delta$ ) are reported in ppm relative to the residual solvent (CDCl<sub>3</sub>) signal ( $\delta = 7.26$  for <sup>1</sup>H NMR and  $\delta = 77.0$  for <sup>13</sup>C NMR), Data for <sup>1</sup>H NMR spectra are reported as follows: chemical shift (multiplicity, coupling constants, and the number of hydrogen). Abbreviations are as follows: s (singlet), d (doublet), t (triplet), q (quartet), m (multiplet), brs (broad singlet). The MS data were obtained with ESI technique, and the relative intensity (%) is given in brackets. High-Resolution Mass Spectrometry (HRMS) data were measured on a Bruker ApexII mass spectrometer by means of the ESI technique. The IR spectra were recorded on Nicolet Nexus 670 FT-IR spectrometer. The X-ray single-crystal determination was performed on a Bruker Smart 1000 CCD X-ray single crystal diffractometer. Compound **1** was prepared according to the reported literature.<sup>1</sup>

## 1. Typical Procedure and Characterization for Phosphonium Salt.

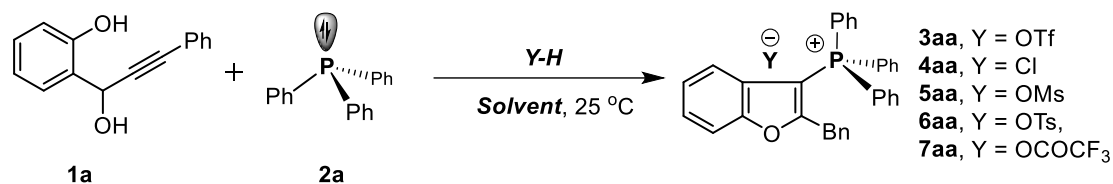

**Table 1. Optimization of the Reaction Conditions**

| entry     | solvent           | Y-H                  | yield (%) <sup>a</sup> |
|-----------|-------------------|----------------------|------------------------|
| <b>1</b>  | DCE               | TfOH                 | 85                     |
| <b>2</b>  | DMF               | TfOH                 | 53                     |
| <b>3</b>  | MeCN              | TfOH                 | 77                     |
| <b>4</b>  | THF               | TfOH                 | 90                     |
| <b>5</b>  | CHCl <sub>3</sub> | TfOH                 | 97                     |
| <b>6</b>  | acetone           | TfOH                 | 99                     |
| <b>7</b>  | acetone           | HCl <sup>b</sup>     | 98                     |
| <b>8</b>  | acetone           | MsOH                 | 98                     |
| <b>9</b>  | acetone           | TsOH                 | 90                     |
| <b>10</b> | acetone           | CF <sub>3</sub> COOH | 81                     |

Reaction conditions: A mixture of **2a** (0.11 mmol; 1.1 equiv.), solvent (1 mL), and **Y-H** (0.11 mmol; 1.1 equiv.) was prepared at 25 °C. The reaction mixture was stirred for 3 minutes, then charged with **1a** (0.10 mmol; 1.0 equiv.), and stirred for 4 h. <sup>a</sup> Yields determined after purification of the compounds are reported. <sup>b</sup> HCl (0.33 mmol; 3.3 equiv.) was used.

## 2. General Procedure for the Synthesis of *o*-hydroxyl-benzyl alcohol (*o*-HBAs)

Compounds *o*-hydroxyl-benzyl alcohol (*o*-HBAs) **1a-1x** were prepared according to the reported literature.<sup>1</sup> Compounds **1y** and **1z** were prepared according to ref. 1i.

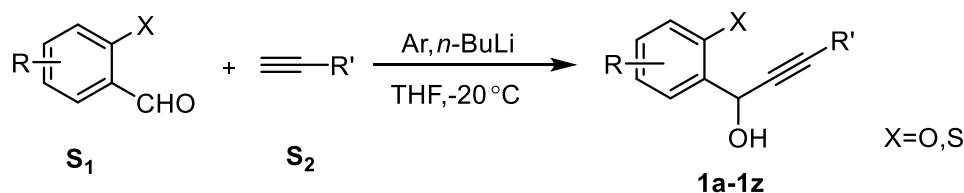

To the solution of  $\text{S}_2$  (2.2 mmol) in dry THF (10 mL) was slowly added  $n\text{-BuLi}$  (2.1 mmol, 2.5 M in THF) at  $-20^\circ\text{C}$  under argon. The reaction mixture was stirred at this temperature for 1 h, then a solution of the corresponding salicylaldehyde  $\text{S}_1$  (1 mmol in 4 mL of THF) was added dropwise via cannula slowly. The reaction mixture was stirred at  $-20^\circ\text{C}$  for another 0.5 h until the disappearance of the starting material. Then the reaction mixture was quenched by the addition of saturated  $\text{NH}_4\text{Cl}$ . The aqueous phase was extracted with EtOAc. Combined organic layers were washed with brine, dried over  $\text{Na}_2\text{SO}_4$  and evaporated. Crude products **1a-1z** were purified by column chromatography [gradient eluent: petroleum ether/EtOAc].

### 3. General Procedure for the Synthesis of Heterocyclic Phosphonium Salts and the Spectral Data of the Compounds.

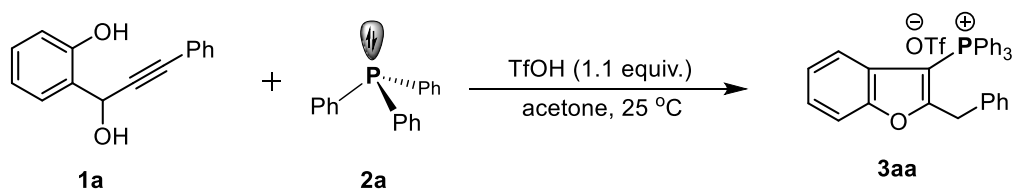

#### For 0.1 mmol Scale:

A dry and nitrogen-flushed 15 mL screw-capped vial equipped with a magnetic stir bar and septum was sequentially charged with phosphine  $\text{PPh}_3$  (0.11 mmol; 1.1 equiv.), acetone (1 mL) and TfOH (0.11 mmol; 1.1 equiv.). The reaction mixture was stirred for 3 minutes; then, it was charged *o*-hydroxyl-benzyl alcohol (*o*-HBAs) (0.1 mmol; 1.0 equiv.) at  $25^\circ\text{C}$ . Next, the septum was removed, and the vial was fitted with a Teflon cap. The reaction mixture was allowed to stir for 4 h at room temperature. The reaction mixture without aqueous workup was directly purified by flash column chromatography

on silica gel [gradient eluent: MeOH/CH<sub>2</sub>Cl<sub>2</sub> = 1/50 to 1/20] to obtain pure phosphonium salts (61.7 mg) in 99 % yield.

**For 3.0 g Scale:**

A mixture of **2a** (3.8 g, 14.7 mmol) and TfOH (1.3 mL, 14.7 mmol) was dissolved in acetone (40.0 mL), The reaction mixture was stirred for 30 minutes; then, it was charged **1a** (13.4 mmol, 3.0 g) at 25 °C and stirred for 30 h. The reaction mixture without aqueous workup was directly purified by flash column chromatography on silica gel [gradient eluent: MeOH/CH<sub>2</sub>Cl<sub>2</sub> = 1/50 to 1/20] to obtain pure phosphonium salts **3aa** (7.4 g) in 90 % yield.

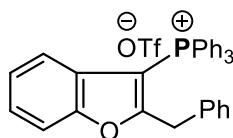

**3aa**

**Compound 3aa:** (99% yield, *R<sub>f</sub>* = 0.25 [20:1 CH<sub>2</sub>Cl<sub>2</sub>/CH<sub>3</sub>OH], white crystal, mp. = 191-192°C):

<sup>1</sup>H NMR (500 MHz, Chloroform-*d*) δ = 7.91 – 7.83 (m, 3H), 7.78 – 7.69 (m, 12H), 7.65 (d, *J* = 8.4 Hz, 1H), 7.41 (s, 1H), 7.22 – 7.15 (m, 3H), 7.12 (t, *J* = 7.7 Hz, 1H), 6.78 – 6.72 (m, 2H), 6.49 (d, *J* = 8.0 Hz, 1H), 3.64 ppm (s, 2H); <sup>13</sup>C NMR (126 MHz, CDCl<sub>3</sub>) δ = 169.4 (d, *J* = 20.4 Hz), 154.4 (d, *J* = 12.8 Hz), 135.8 (d, *J* = 3.0 Hz), 134.5, 134.1 (d, *J* = 10.9 Hz), 130.8 (d, *J* = 13.2 Hz), 128.7, 127.9, 127.3, 127.0 (d, *J* = 9.7 Hz), 126.5, 125.1, 120.8 (q, *J* = 319.1 Hz), 120.4, 117.3 (d, *J* = 92.0 Hz), 112.4, 92.8 (d, *J* = 112.2 Hz), 33.8 ppm; <sup>31</sup>P NMR (202 MHz, CDCl<sub>3</sub>): δ = 10.7 ppm; <sup>19</sup>F NMR (471 MHz, CDCl<sub>3</sub>): δ = -78.1 ppm; HRMS (ESI): *m/z* calcd for [M]<sup>+</sup> = C<sub>33</sub>H<sub>26</sub>OP: 469.1721; found: 469.1823; ATR-FTIR (cm<sup>-1</sup>):  $\bar{\nu}$  = 3215, 3060, 2864, 1439, 1239, 750, 515 cm<sup>-1</sup>.

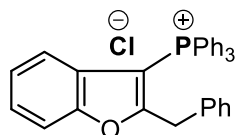

**4aa**

**Compound 4aa:** (98% yield,  $R_f = 0.30$  [10:1 CH<sub>2</sub>Cl<sub>2</sub>/CH<sub>3</sub>OH], white crystal, mp. = 192-193 °C):

**<sup>1</sup>H NMR** (500 MHz, Chloroform-*d*)  $\delta = 7.96 - 7.89$  (m, 3H), 7.77 (dq,  $J = 16.4, 8.1$  Hz, 12H), 7.68 (d,  $J = 8.3$  Hz, 1H), 7.44 (t,  $J = 7.9$  Hz, 1H), 7.22 - 7.18 (m, 3H), 7.14 (t,  $J = 7.7$  Hz, 1H), 6.80 - 6.72 (m, 2H), 6.49 (d,  $J = 8.0$  Hz, 1H), 3.67 ppm (s, 2H); **<sup>13</sup>C NMR** (126 MHz, Chloroform-*d*)  $\delta = 169.2$  (d,  $J = 20.4$  Hz), 154.4 (d,  $J = 12.7$  Hz), 136.1 (d,  $J = 3.1$  Hz), 134.4, 134.1 (d,  $J = 10.9$  Hz), 131.0 (d,  $J = 13.2$  Hz), 128.8, 127.9, 127.4, 126.9 (d,  $J = 9.7$  Hz), 126.7, 125.2, 120.5, 117.2 (d,  $J = 92.1$  Hz), 112.5, 92.9 (d,  $J = 112.0$  Hz), 34.0 ppm; **<sup>31</sup>P NMR** (202 MHz, CDCl<sub>3</sub>)  $\delta = 10.7$  ppm; **HRMS** (ESI):  $m/z$  calcd for [M]<sup>+</sup> = C<sub>33</sub>H<sub>26</sub>OP: 469.1721 found: 469.1725; **ATR-FTIR** (cm<sup>-1</sup>):  $\bar{\nu} = 3054, 2921, 1437, 1118, 721, 541$  cm<sup>-1</sup>.

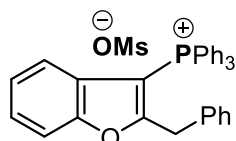

**5aa**

**Compound 5aa:** (98% yield,  $R_f = 0.27$  [10:1 CH<sub>2</sub>Cl<sub>2</sub>/CH<sub>3</sub>OH], white crystal, mp. = 204-206 °C):

**<sup>1</sup>H NMR** (500 MHz, Chloroform-*d*)  $\delta = 7.90$  (dtd,  $J = 8.8, 4.3, 2.1$  Hz, 3H), 7.81 - 7.73 (m, 12H), 7.67 (d,  $J = 8.4$  Hz, 1H), 7.44 - 7.39 (m, 1H), 7.19 (dd,  $J = 4.9, 1.8$  Hz, 3H), 7.14 - 7.08 (m, 1H), 6.76 (dd,  $J = 6.3, 2.6$  Hz, 2H), 6.48 (d,  $J = 8.0$  Hz, 1H), 3.65 (s, 2H), 2.71 ppm (s, 3H); **<sup>13</sup>C NMR** (126 MHz, Chloroform-*d*)  $\delta = 169.2$  (d,  $J = 20.3$  Hz), 154.3 (d,  $J = 12.8$  Hz), 135.9 (d,  $J = 3.2$  Hz), 134.3, 134.0 (d,  $J = 11.0$  Hz), 130.8 (d,  $J = 13.2$  Hz), 128.6, 127.8, 127.2, 126.9 (d,  $J = 9.7$  Hz), 126.5, 125.0, 120.4, 117.1 (d,  $J = 92.0$  Hz), 112.4, 92.8 (d,  $J = 112.1$  Hz), 39.2, 33.8 ppm; **<sup>31</sup>P NMR** (202 MHz, CDCl<sub>3</sub>)  $\delta = 10.6$  ppm; **HRMS** (ESI):  $m/z$  calcd for [M]<sup>+</sup> = C<sub>33</sub>H<sub>26</sub>OP: 469.1721; found: 469.1718; **ATR-FTIR** (cm<sup>-1</sup>):  $\bar{\nu} = 3063, 2922, 1436, 1204, 756, 544$  cm<sup>-1</sup>.

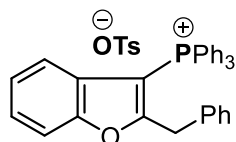

**6aa**

**Compound 6aa:** (90% yield,  $R_f = 0.35$  [10:1  $\text{CH}_2\text{Cl}_2/\text{CH}_3\text{OH}$ ], white crystal, mp. = 197-199 °C):

$^1\text{H NMR}$  (500 MHz, Chloroform- $d$ )  $\delta = 7.86$  (t,  $J = 7.0$  Hz, 3H), 7.80 – 7.69 (m, 14H), 7.64 (d,  $J = 8.4$  Hz, 1H), 7.41 (t,  $J = 7.9$  Hz, 1H), 7.20 – 7.15 (m, 3H), 7.10 (t,  $J = 7.7$  Hz, 1H), 7.01 (d,  $J = 7.8$  Hz, 2H), 6.74 (d,  $J = 4.8$  Hz, 2H), 6.46 (d,  $J = 8.0$  Hz, 1H), 3.63 (s, 2H), 2.26 ppm (s, 3H);  $^{13}\text{C NMR}$  (126 MHz, Chloroform- $d$ )  $\delta = 169.4$  (d,  $J = 20.3$  Hz), 154.4 (d,  $J = 12.8$  Hz), 144.5, 138.2, 135.9 (d,  $J = 3.2$  Hz), 134.6, 134.1 (d,  $J = 11.0$  Hz), 130.9 (d,  $J = 13.3$  Hz), 128.7, 128.0 (d,  $J = 11.9$  Hz), 127.3, 127.1 (d,  $J = 10.0$  Hz), 126.5, 126.1, 125.0, 120.5, 117.2 (d,  $J = 92.0$  Hz), 112.4, 92.9 (d,  $J = 112.2$  Hz), 33.9, 21.2 ppm;  $^{31}\text{P NMR}$  (202 MHz,  $\text{CDCl}_3$ )  $\delta = 10.6$  ppm; **HRMS** (ESI):  $m/z$  calcd for  $[\text{M}]^+ = \text{C}_{33}\text{H}_{26}\text{OP}$ : 469.1721 found: 469.1722; **ATR-FTIR** ( $\text{cm}^{-1}$ ):  $\bar{\nu} = 3057$ , 2916, 1435, 1212, 678, 545  $\text{cm}^{-1}$ .

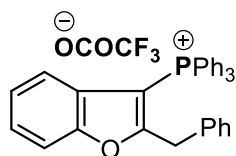

**7aa**

**Compound 7aa:** (81% yield,  $R_f = 0.30$  [10:1  $\text{CH}_2\text{Cl}_2/\text{CH}_3\text{OH}$ ], white crystal, mp. = 164-166 °C):

$^1\text{H NMR}$  (500 MHz, Chloroform- $d$ )  $\delta = 7.87$  (dq,  $J = 8.7, 4.7$  Hz, 3H), 7.76 – 7.69 (m, 12H), 7.67 – 7.64 (m, 1H), 7.44 – 7.39 (m, 1H), 7.19 (dd,  $J = 4.9, 1.8$  Hz, 3H), 7.14 – 7.09 (m, 1H), 6.75 (dd,  $J = 6.4, 2.9$  Hz, 2H), 6.49 (d,  $J = 7.9$  Hz, 1H), 3.63 ppm (s, 2H);  $^{13}\text{C NMR}$  (126 MHz, Chloroform- $d$ )  $\delta = 169.3$  (d,  $J = 20.2$  Hz), 154.5 (d,  $J = 12.8$  Hz), 136.0 (d,  $J = 3.1$  Hz), 134.5, 134.1 (d,  $J = 11.0$  Hz), 130.9 (d,  $J = 13.3$  Hz), 128.8, 127.9, 127.4, 127.0 (d,  $J = 9.8$  Hz), 126.8, 125.2, 120.5, 117.3 (d,  $J = 92.0$  Hz), 112.5, 93.0 (d,

$J = 111.8$  Hz), 33.8 ppm;  $^{31}\text{P}$  NMR (202 MHz,  $\text{CDCl}_3$ )  $\delta = 10.7$  ppm;  $^{19}\text{F}$  NMR (471 MHz,  $\text{CDCl}_3$ )  $\delta = -75.1$  ppm; HRMS (ESI):  $m/z$  calcd for  $[\text{M}]^+ = \text{C}_{33}\text{H}_{26}\text{OP}$ : 469.1721; found: 469.1721; ATR-FTIR ( $\text{cm}^{-1}$ ):  $\bar{\nu} = 3065, 2921, 1685, 1439, 1207, 722, 542$   $\text{cm}^{-1}$ .

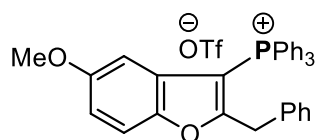

**3ba**

**Compound 3ba:** (99% yield,  $R_f = 0.25$  [20:1  $\text{CH}_2\text{Cl}_2/\text{CH}_3\text{OH}$ ], white crystal, mp. = 192-193  $^\circ\text{C}$ ):

$^1\text{H}$  NMR (500 MHz, Chloroform- $d$ )  $\delta = 7.88$  (dd,  $J = 8.4, 5.0$  Hz, 3H), 7.80 – 7.71 (m, 12H), 7.57 – 7.51 (m, 1H), 7.18 (dt,  $J = 3.4, 1.7$  Hz, 3H), 7.00 – 6.95 (m, 1H), 6.77 – 6.70 (m, 2H), 5.77 (d,  $J = 2.0$  Hz, 1H), 3.62 (s, 2H), 3.41 ppm (s, 3H);  $^{13}\text{C}$  NMR (126 MHz,  $\text{CDCl}_3$ )  $\delta = 169.7$  (d,  $J = 20.4$  Hz), 157.1, 149.3 (d,  $J = 12.7$  Hz), 135.8 (d,  $J = 3.1$  Hz), 134.5, 134.1 (d,  $J = 10.9$  Hz), 130.9 (d,  $J = 13.2$  Hz), 128.7, 128.0, 127.7 (d,  $J = 9.4$  Hz), 127.3, 120.9 (q,  $J = 319.0$  Hz), 117.2 (d,  $J = 92.0$  Hz), 114.9, 113.0, 103.0, 92.4 (d,  $J = 112.1$  Hz), 55.6, 34.0 ppm;  $^{19}\text{F}$  NMR (471 MHz,  $\text{CDCl}_3$ )  $\delta = -78.1$  ppm;  $^{31}\text{P}$  NMR (202 MHz,  $\text{CDCl}_3$ )  $\delta = 10.7$  ppm; HRMS (ESI):  $m/z$  calcd for  $[\text{M}]^+ = \text{C}_{34}\text{H}_{28}\text{O}_2\text{P}$ : 499.1827; found: 499.1826; ATR-FTIR ( $\text{cm}^{-1}$ ):  $\bar{\nu} = 3068, 2916, 1474, 1265, 1154, 723, 516$   $\text{cm}^{-1}$ .

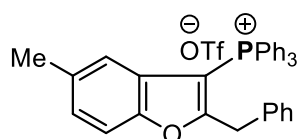

**3ca**

**Compound 3ca:** (99% yield,  $R_f = 0.23$  [20:1  $\text{CH}_2\text{Cl}_2/\text{CH}_3\text{OH}$ ], white crystal, mp. = 160-161  $^\circ\text{C}$ ):

$^1\text{H}$  NMR (500 MHz, Chloroform- $d$ )  $\delta = 7.91 - 7.87$  (m, 3H), 7.78 – 7.70 (m, 12H), 7.52 (dd,  $J = 8.5, 1.7$  Hz, 1H), 7.23 – 7.20 (m, 1H), 7.19 – 7.15 (m, 3H), 6.78 – 6.71 (m, 2H), 6.21 (s, 1H), 3.60 (s, 2H), 2.17 ppm (s, 3H);  $^{13}\text{C}$  NMR (126 MHz,  $\text{CDCl}_3$ )  $\delta = 169.2$  (d,  $J = 20.5$  Hz), 152.9 (d,  $J = 12.8$  Hz), 135.8 (d,  $J = 3.0$  Hz), 135.0, 134.6,



134.1 (d,  $J = 10.9$  Hz), 130.8 (d,  $J = 13.2$  Hz), 128.7, 127.9, 127.8, 127.3, 127.1 (d,  $J = 9.6$  Hz), 120.9 (q,  $J = 319.1$  Hz), 120.1, 117.4 (d,  $J = 92.1$  Hz), 111.9, 92.3 (d,  $J = 112.2$  Hz), 33.8, 21.3 ppm;  $^{19}\text{F}$  NMR (471 MHz,  $\text{CDCl}_3$ )  $\delta = -78.0$  ppm;  $^{31}\text{P}$  NMR (202 MHz,  $\text{CDCl}_3$ )  $\delta = 10.7$  ppm; HRMS (ESI):  $m/z$  calcd for  $[\text{M}]^+ = \text{C}_{34}\text{H}_{28}\text{OP}$ : 483.1878; found: 483.1873; ATR-FTIR ( $\text{cm}^{-1}$ ):  $\bar{\nu} = 3064, 2920, 1442, 1265, 721, 544$   $\text{cm}^{-1}$ .

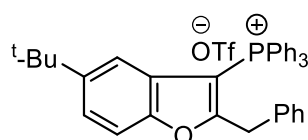

**3da**

**Compound 3da:** (99% yield,  $R_f = 0.25$  [20:1  $\text{CH}_2\text{Cl}_2/\text{CH}_3\text{OH}$ ], white crystal, mp. = 194-196  $^\circ\text{C}$ ):

$^1\text{H}$  NMR (500 MHz, Chloroform- $d$ )  $\delta = 7.81$  (td,  $J = 6.3, 5.9, 2.7$  Hz, 3H), 7.71 – 7.64 (m, 12H), 7.47 (s, 1H), 7.36 (dd,  $J = 8.8, 1.7$  Hz, 1H), 7.11 – 7.06 (m, 3H), 6.69 – 6.63 (m, 2H), 6.26 – 6.23 (m, 1H), 3.57 (s, 2H), 0.93 ppm (s, 9H);  $^{13}\text{C}$  NMR (126 MHz,  $\text{CDCl}_3$ )  $\delta = 169.1$  (d,  $J = 20.6$  Hz), 152.7 (d,  $J = 12.8$  Hz), 148.3, 135.8 (d,  $J = 3.0$  Hz), 134.4, 134.1 (d,  $J = 10.9$  Hz), 130.8 (d,  $J = 13.2$  Hz), 128.7, 127.9, 127.2, 126.7 (d,  $J = 9.7$  Hz), 124.2, 120.8 (q,  $J = 319.3$  Hz), 117.3 (d,  $J = 92.0$  Hz), 116.7, 111.6, 92.6 (d,  $J = 111.9$  Hz), 34.6, 34.0, 31.2 ppm;  $^{19}\text{F}$  NMR (471 MHz,  $\text{CDCl}_3$ )  $\delta = -78.1$  ppm;  $^{31}\text{P}$  NMR (202 MHz,  $\text{CDCl}_3$ )  $\delta = 10.8$  ppm; HRMS (ESI):  $m/z$  calcd for  $[\text{M}]^+ = \text{C}_{37}\text{H}_{34}\text{OP}$ : 525.2347; found: 525.2341; ATR-FTIR ( $\text{cm}^{-1}$ ):  $\bar{\nu} = 3063, 2954, 1436, 1265, 726, 545$   $\text{cm}^{-1}$ .

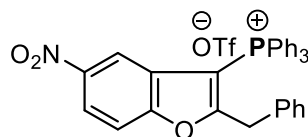

**3ea**

**Compound 3ea:** (99% yield,  $R_f = 0.21$  [20:1  $\text{CH}_2\text{Cl}_2/\text{CH}_3\text{OH}$ ], white crystal, mp. = 173-175  $^\circ\text{C}$ )

$^1\text{H}$  NMR (500 MHz, Chloroform- $d$ )  $\delta = 8.27 - 8.19$  (m, 1H), 7.91 – 7.80 (m, 9H), 7.79 – 7.69 (m, 7H), 7.21 – 7.13 (m, 3H), 7.11 (s, 1H), 6.82 – 6.71 (m, 2H), 3.76 ppm (s, 2H);  $^{13}\text{C}$  NMR (126 MHz, Chloroform- $d$ )  $\delta = 173.2$  (d,  $J = 19.5$  Hz), 157.4 (d,  $J =$

12.4 Hz), 145.0, 136.2 (d,  $J = 3.3$  Hz), 134.4 (d,  $J = 11.1$  Hz), 133.9, 131.1 (d,  $J = 13.4$  Hz), 128.9, 128.4, 128.0 (d,  $J = 9.8$  Hz), 127.6, 122.0, 117.1, 116.3 (d,  $J = 2.8$  Hz), 120.9 (t,  $J = 318.8$  Hz), 113.4, 94.0 (d,  $J = 112.2$  Hz), 34.6 ppm;  $^{31}\text{P}$  NMR (202 MHz,  $\text{CDCl}_3$ )  $\delta = 10.6$  ppm;  $^{19}\text{F}$  NMR (471 MHz,  $\text{CDCl}_3$ )  $\delta = -78.2$  ppm; HRMS (ESI):  $m/z$  calcd for  $[\text{M}]^+ = \text{C}_{33}\text{H}_{25}\text{NO}_3\text{P}$ : 514.1572; found: 514.1570; ATR-FTIR ( $\text{cm}^{-1}$ ):  $\bar{\nu} = 3061, 2923, 1529, 1261, 638, 514$   $\text{cm}^{-1}$ .

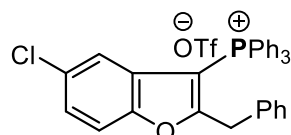

**3fa**

**Compound 3fa:** (99% yield,  $R_f = 0.26$  [20:1  $\text{CH}_2\text{Cl}_2/\text{CH}_3\text{OH}$ ], white crystal, mp. = 192-193  $^\circ\text{C}$ ):

$^1\text{H}$  NMR (500 MHz, Chloroform- $d$ )  $\delta = 7.89$  (ddd,  $J = 7.5, 4.4, 1.9$  Hz, 3H), 7.80 – 7.74 (m, 12H), 7.59 (dd,  $J = 8.8, 1.6$  Hz, 1H), 7.35 (dd,  $J = 8.9, 2.0$  Hz, 1H), 7.19 (q,  $J = 3.7$  Hz, 3H), 6.75 (dd,  $J = 6.4, 2.8$  Hz, 2H), 6.31 (d,  $J = 1.9$  Hz, 1H), 3.66 ppm (s, 2H);  $^{13}\text{C}$  NMR (126 MHz, Chloroform- $d$ )  $\delta = 171.1$  (d,  $J = 20.0$  Hz), 152.9 (d,  $J = 12.5$  Hz), 136.0 (d,  $J = 3.1$  Hz), 134.2 (d,  $J = 11.0$  Hz), 131.0 (d,  $J = 13.3$  Hz), 130.7, 128.8, 128.5 (d,  $J = 9.6$  Hz), 128.1, 127.4, 126.9, 120.9 (q,  $J = 319.1$  Hz), 119.8, 117.0 (d,  $J = 92.0$  Hz), 113.6, 92.5 (d,  $J = 112.3$  Hz), 34.1 ppm;  $^{19}\text{F}$  NMR (471 MHz,  $\text{CDCl}_3$ )  $\delta = -78.1$  ppm;  $^{31}\text{P}$  NMR (202 MHz,  $\text{CDCl}_3$ )  $\delta = 10.5$  ppm; HRMS (ESI):  $m/z$  calcd for  $[\text{M}]^+ = \text{C}_{33}\text{H}_{25}\text{ClOP}$ : 503.1331; found: 503.1330; ATR-FTIR ( $\text{cm}^{-1}$ ):  $\bar{\nu} = 3084, 2921, 1443, 1265, 725, 541$   $\text{cm}^{-1}$ .

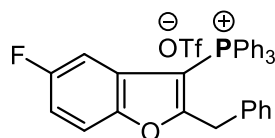

**3ga**

**Compound 3ga:** (99% yield,  $R_f = 0.25$  [20:1  $\text{CH}_2\text{Cl}_2/\text{CH}_3\text{OH}$ ], white crystal, mp. = 164 -165 $^\circ\text{C}$ ):

$^1\text{H}$  NMR (500 MHz, Chloroform- $d$ )  $\delta = 7.91 - 7.86$  (m, 3H), 7.80 – 7.73 (m, 12H),

7.62 (ddd,  $J = 8.9, 3.9, 1.6$  Hz, 1H), 7.23 – 7.16 (m, 3H), 7.12 (td,  $J = 9.0, 2.5$  Hz, 1H), 6.79 – 6.72 (m, 2H), 6.04 (dd,  $J = 8.3, 2.4$  Hz, 1H), 3.65 ppm (s, 2H);  $^{13}\text{C NMR}$  (126 MHz, Chloroform- $d$ )  $\delta = 171.3$  (d,  $J = 20.1$  Hz), 159.7 (d,  $J = 243.6$  Hz), 150.7 (d,  $J = 12.5$  Hz), 135.9 (d,  $J = 3.2$  Hz), 134.3, 134.1 (d,  $J = 11.0$  Hz), 128.8, 128.1, 127.4, 120.9 (q,  $J = 318.8$  Hz), 116.9 (d,  $J = 92.2$  Hz), 114.5 (d,  $J = 26.2$  Hz), 113.7 (d,  $J = 9.6$  Hz), 106.3 (d,  $J = 27.0$  Hz), 92.9 (dd,  $J = 112.4, 3.6$  Hz), 34.1 ppm;  $^{19}\text{F NMR}$  (471 MHz,  $\text{CDCl}_3$ )  $\delta = -78.1, -115.4$  ppm;  $^{31}\text{P NMR}$  (202 MHz,  $\text{CDCl}_3$ )  $\delta = 10.6$  ppm; **HRMS** (ESI):  $m/z$  calcd for  $[\text{M}]^+ = \text{C}_{33}\text{H}_{25}\text{FOP}$ : 487.1627; found: 487.1625; **ATR-FTIR** ( $\text{cm}^{-1}$ ):  $\bar{\nu} = 3063, 2899, 1440, 1266, 1143, 752, 514$   $\text{cm}^{-1}$ .

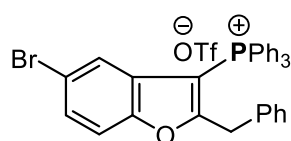

**3ha**

**Compound 3ha:** (99% yield,  $R_f = 0.25$  [20:1  $\text{CH}_2\text{Cl}_2/\text{CH}_3\text{OH}$ ], white crystal, mp. = 177-178  $^\circ\text{C}$ ):

$^1\text{H NMR}$  (500 MHz, Chloroform- $d$ )  $\delta = 7.93 - 7.86$  (m, 3H), 7.82 – 7.73 (m, 12H), 7.54 (dd,  $J = 8.8, 1.5$  Hz, 1H), 7.49 (d,  $J = 1.8$  Hz, 1H), 7.22 – 7.16 (m, 3H), 6.79 – 6.72 (m, 2H), 6.44 (d,  $J = 1.6$  Hz, 1H), 3.66 ppm (s, 2H);  $^{13}\text{C NMR}$  (126 MHz, Chloroform- $d$ )  $\delta = 170.8$  (d,  $J = 19.9$  Hz), 153.2 (d,  $J = 12.4$  Hz), 135.9 (d,  $J = 3.2$  Hz), 134.1 (d,  $J = 10.9$  Hz), 130.9 (d,  $J = 13.3$  Hz), 129.5, 129.0 (d,  $J = 9.5$  Hz), 128.7, 128.0, 127.3, 122.7, 120.9 (q,  $J = 320.0$  Hz), 118.0, 116.8 (d,  $J = 92.1$  Hz), 114.0, 92.4 (d,  $J = 112.2$  Hz), 34.0 ppm;  $^{19}\text{F NMR}$  (471 MHz,  $\text{CDCl}_3$ )  $\delta = -78.1$  ppm;  $^{31}\text{P NMR}$  (202 MHz,  $\text{CDCl}_3$ )  $\delta = 10.5$  ppm; **HRMS** (ESI):  $m/z$  calcd for  $[\text{M}]^+ = \text{C}_{33}\text{H}_{25}\text{BrOP}$ : 547.0826; found: 547.0825; **ATR-FTIR** ( $\text{cm}^{-1}$ ):  $\bar{\nu} = 3085, 2922, 1541, 1444, 1262, 722, 568$   $\text{cm}^{-1}$ .

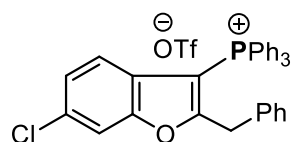

**3ia**

**Compound 3ia:** (99% yield,  $R_f = 0.22$  [20:1  $\text{CH}_2\text{Cl}_2/\text{CH}_3\text{OH}$ ], white crystal, mp. =

207-208 °C):

**<sup>1</sup>H NMR** (500 MHz, Chloroform-*d*)  $\delta$  = 7.84 – 7.75 (m, 3H), 7.73 – 7.61 (m, 12H), 7.56 (s, 1H), 7.14 – 7.06 (m, 3H), 7.00 (dd,  $J$  = 8.6, 1.8 Hz, 1H), 6.70 – 6.63 (m, 2H), 6.29 (d,  $J$  = 8.6 Hz, 1H), 3.56 ppm (s, 2H); **<sup>13</sup>C NMR** (126 MHz, CDCl<sub>3</sub>)  $\delta$  = 170.3 (d,  $J$  = 20.1 Hz), 154.5 (d,  $J$  = 12.6 Hz), 135.9 (d,  $J$  = 3.0 Hz), 134.3, 134.1 (d,  $J$  = 11.0 Hz), 132.5, 130.9 (d,  $J$  = 13.3 Hz), 128.8, 128.0, 127.4, 125.7 (d,  $J$  = 9.5 Hz), 125.7, 120.8 (q,  $J$  = 319.1 Hz), 120.9, 117.0 (d,  $J$  = 92.0 Hz), 113.0, 93.1 (d,  $J$  = 112.2 Hz), 33.8 ppm; **<sup>19</sup>F NMR** (471 MHz, CDCl<sub>3</sub>)  $\delta$  = -78.1, -78.1 ppm; **<sup>31</sup>P NMR** (202 MHz, CDCl<sub>3</sub>)  $\delta$  = 10.6 ppm; **HRMS** (ESI):  $m/z$  calcd for [M]<sup>+</sup> = C<sub>33</sub>H<sub>25</sub>ClOP: 503.1332; found: 503.1331; **ATR-FTIR** (cm<sup>-1</sup>):  $\bar{\nu}$  = 3063, 2915, 1437, 1265, 721, 514 cm<sup>-1</sup>.

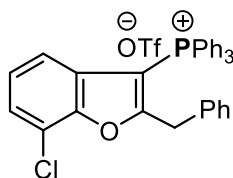

**3ja**

**Compound 3ja:** (99% yield,  $R_f$  = 0.22 [20:1 CH<sub>2</sub>Cl<sub>2</sub>/CH<sub>3</sub>OH], white crystal, mp. = 220 -221°C):

**<sup>1</sup>H NMR** (500 MHz, Chloroform-*d*)  $\delta$  = 7.88 (dq,  $J$  = 6.1, 3.3 Hz, 3H), 7.78 – 7.69 (m, 12H), 7.41 (d,  $J$  = 7.8 Hz, 1H), 7.21 – 7.16 (m, 3H), 7.07 (t,  $J$  = 8.0 Hz, 1H), 6.78 – 6.71 (m, 2H), 6.37 (d,  $J$  = 8.0 Hz, 1H), 3.69 ppm (s, 2H); **<sup>13</sup>C NMR** (126 MHz, Chloroform-*d*)  $\delta$  = 170.0 (d,  $J$  = 20.1 Hz), 150.5 (d,  $J$  = 12.4 Hz), 136.0 (d,  $J$  = 3.1 Hz), 134.2, 134.1 (d,  $J$  = 11.0 Hz), 130.9 (d,  $J$  = 13.3 Hz), 128.7, 128.5 (d,  $J$  = 9.9 Hz), 127.9, 127.4, 126.7, 126.0, 120.8 (q,  $J$  = 320.0 Hz), 118.9, 118.1, 116.8 (d,  $J$  = 92.0 Hz), 94.0 (d,  $J$  = 111.2 Hz), 33.8 ppm; **<sup>31</sup>P NMR** (202 MHz, CDCl<sub>3</sub>)  $\delta$  = 10.7 ppm; **<sup>19</sup>F NMR** (471 MHz, CDCl<sub>3</sub>)  $\delta$  = -78.1 ppm; **HRMS** (ESI):  $m/z$  calcd for [M]<sup>+</sup> = C<sub>33</sub>H<sub>25</sub>ClOP: 503.1331; found: 503.1327; **ATR-FTIR** (cm<sup>-1</sup>):  $\bar{\nu}$  = 3064, 2919, 1537, 1438, 1273, 723, 514 cm<sup>-1</sup>.

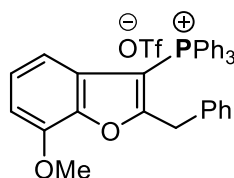

**3ka**

**Compound 3ka:** (85% yield,  $R_f = 0.25$  [20:1  $\text{CH}_2\text{Cl}_2/\text{CH}_3\text{OH}$ ], white crystal, mp. = 169-171 °C):

$^1\text{H NMR}$  (500 MHz, Chloroform-*d*)  $\delta = 7.91 - 7.82$  (m, 3H), 7.75 – 7.67 (m, 12H), 7.17 (dd,  $J = 4.9, 1.6$  Hz, 3H), 7.05 (t,  $J = 8.1$  Hz, 1H), 6.92 (d,  $J = 8.1$  Hz, 1H), 6.75 – 6.68 (m, 2H), 6.07 (d,  $J = 8.0$  Hz, 1H), 4.03 (s, 3H), 3.65 ppm (s, 2H);  $^{13}\text{C NMR}$  (126 MHz, Chloroform-*d*)  $\delta = 169.0$  (d,  $J = 20.3$  Hz), 145.8, 144.1 (d,  $J = 12.8$  Hz), 135.8 (d,  $J = 3.2$  Hz), 134.6, 134.1 (d,  $J = 11.0$  Hz), 130.8 (d,  $J = 13.3$  Hz), 128.7, 128.6 (d,  $J = 9.8$  Hz), 127.7, 127.3, 126.2, 120.9 (q,  $J = 320.0$  Hz), 117.2 (d,  $J = 92.2$  Hz), 112.2, 108.7, 93.3 (d,  $J = 111.7$  Hz), 56.3, 33.7 ppm;  $^{31}\text{P NMR}$  (202 MHz,  $\text{CDCl}_3$ )  $\delta = 10.9$  ppm;  $^{19}\text{F NMR}$  (471 MHz,  $\text{CDCl}_3$ )  $\delta = -78.1$  ppm; **HRMS** (ESI):  $m/z$  calcd for  $[\text{M}]^+ = \text{C}_{34}\text{H}_{28}\text{O}_2\text{P}$ : 499.1827; found:499.1825; **ATR-FTIR** ( $\text{cm}^{-1}$ ):  $\bar{\nu} = 3059, 2922, 1492, 1262, 730, 515 \text{ cm}^{-1}$ .

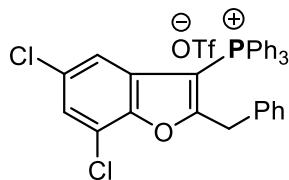

**3la**

**Compound 3la:** (99% yield,  $R_f = 0.25$  [20:1  $\text{CH}_2\text{Cl}_2/\text{CH}_3\text{OH}$ ], white crystal, mp. = 190-191 °C):

$^1\text{H NMR}$  (500 MHz, Chloroform-*d*)  $\delta = 7.92 - 7.87$  (m, 3H), 7.79 – 7.73 (m, 12H), 7.38 (d,  $J = 1.8$  Hz, 1H), 7.19 (q,  $J = 3.7$  Hz, 3H), 6.74 (dd,  $J = 6.4, 2.7$  Hz, 2H), 6.19 (d,  $J = 1.8$  Hz, 1H), 3.71 ppm (s, 2H);  $^{13}\text{C NMR}$  (126 MHz, Chloroform-*d*)  $\delta = 171.5$  (d,  $J = 19.6$  Hz), 149.3 (d,  $J = 12.0$  Hz), 136.1 (d,  $J = 3.2$  Hz), 134.2 (d,  $J = 11.0$  Hz), 133.9, 131.0 (d,  $J = 13.3$  Hz), 129.4 (d,  $J = 9.6$  Hz), 128.8, 128.0, 127.4, 126.7, 120.9 (q,  $J = 318.8$  Hz), 118.9, 118.3, 116.5 (d,  $J = 91.9$  Hz), 93.7 (d,  $J = 111.3$  Hz), 34.0

ppm;  $^{31}\text{P}$  NMR (202 MHz,  $\text{CDCl}_3$ )  $\delta = 10.5$  ppm;  $^{19}\text{F}$  NMR (471 MHz,  $\text{CDCl}_3$ )  $\delta = -78.1$  ppm; HRMS (ESI):  $m/z$  calcd for  $[\text{M}]^+ = \text{C}_{33}\text{H}_{24}\text{Cl}_2\text{OP}$ : 537.042; found: 537.0938; ATR-FTIR ( $\text{cm}^{-1}$ ):  $\bar{\nu} = 3075, 2922, 1577, 1439, 1270, 726, 514$   $\text{cm}^{-1}$ .

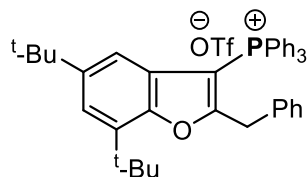

**3ma**

**Compound 3ma:** (78% yield,  $R_f = 0.35$  [20:1  $\text{CH}_2\text{Cl}_2/\text{CH}_3\text{OH}$ ], white crystal, mp. = 112-115  $^\circ\text{C}$ ):

$^1\text{H}$  NMR (500 MHz, Chloroform- $d$ )  $\delta = 7.88$  (d,  $J = 7.1$  Hz, 3H), 7.77 (h,  $J = 7.4$  Hz, 12H), 7.32 (d,  $J = 1.7$  Hz, 1H), 7.21 – 7.14 (m, 3H), 6.77 (dd,  $J = 6.6, 2.8$  Hz, 2H), 6.20 (d,  $J = 1.7$  Hz, 1H), 3.65 (s, 2H), 1.48 (s, 9H), 1.01 ppm (s, 9H);  $^{13}\text{C}$  NMR (126 MHz, Chloroform- $d$ )  $\delta = 169.3$  (d,  $J = 20.6$  Hz), 160.7 (d,  $J = 16.7$  Hz), 154.4 (d,  $J = 12.8$  Hz), 134.7, 132.3 (d,  $J = 15.7$  Hz), 128.8, 127.8, 127.3, 127.0 (d,  $J = 9.7$  Hz), 126.6, 126.0 (d,  $J = 10.5$  Hz), 125.1, 120.9 (d,  $J = 3.1$  Hz), 120.9 (q,  $J = 318.8$  Hz), 120.6, 119.7 (d,  $J = 12.6$  Hz), 118.3 (d,  $J = 91.7$  Hz), 112.5, 92.9 (d,  $J = 112.2$  Hz), 55.8, 33.8 ppm;  $^{31}\text{P}$  NMR (202 MHz,  $\text{CDCl}_3$ )  $\delta = 10.8$  ppm;  $^{19}\text{F}$  NMR (471 MHz,  $\text{CDCl}_3$ )  $\delta = -78.1$  ppm; HRMS (ESI):  $m/z$  calcd for  $[\text{M}]^+ = \text{C}_{41}\text{H}_{42}\text{OP}$ : 581.2968; found: 581.2972; ATR-FTIR ( $\text{cm}^{-1}$ ):  $\bar{\nu} = 3066, 2938, 1592, 1262, 1030, 636, 498$   $\text{cm}^{-1}$ .

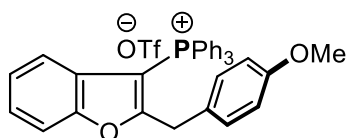

**3na**

**Compound 3na:** (99% yield,  $R_f = 0.30$  [20:1  $\text{CH}_2\text{Cl}_2/\text{CH}_3\text{OH}$ ], white crystal, mp. = 92-94  $^\circ\text{C}$ ):

$^1\text{H}$  NMR (500 MHz, Chloroform- $d$ )  $\delta = 7.89$  (dq,  $J = 8.7, 4.4, 4.0$  Hz, 4H), 7.81 – 7.72 (m, 12H), 7.58 (dd,  $J = 8.8, 1.5$  Hz, 1H), 7.34 (dd,  $J = 8.8, 1.5$  Hz, 1H), 6.99 (d,  $J = 7.9$  Hz, 2H), 6.64 (d,  $J = 7.9$  Hz, 2H), 6.30 (d,  $J = 1.8$  Hz, 1H), 3.59 (s, 2H), 2.26 ppm (s,

3H);  $^{13}\text{C}$  NMR (126 MHz, Chloroform-*d*)  $\delta$  = 171.3 (d,  $J$  = 20.2 Hz), 152.9 (d,  $J$  = 12.4 Hz), 137.1, 135.9 (d,  $J$  = 3.2 Hz), 134.1 (d,  $J$  = 10.9 Hz), 131.0, 130.9 (d,  $J$  = 13.3 Hz), 130.6, 129.4, 128.5 (d,  $J$  = 9.5 Hz), 128.0, 126.8, 120.8 (q,  $J$  = 320.0 Hz), 119.7, 116.9 (d,  $J$  = 92.0 Hz), 113.6, 92.3 (d,  $J$  = 112.3 Hz), 33.6, 20.9 ppm;  $^{31}\text{P}$  NMR (202 MHz,  $\text{CDCl}_3$ )  $\delta$  = 10.6 ppm;  $^{19}\text{F}$  NMR (471 MHz,  $\text{CDCl}_3$ )  $\delta$  = -78.1 ppm; HRMS (ESI):  $m/z$  calcd for  $[\text{M}]^+ = \text{C}_{33}\text{H}_{28}\text{O}_2\text{P}$ : 487.1827; found: 487.1914; ATR-FTIR ( $\text{cm}^{-1}$ ):  $\bar{\nu}$  = 3059, 2920, 1441, 1268, 637, 541  $\text{cm}^{-1}$ .

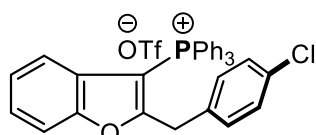

**30a**

**Compound 30a:** (99% yield,  $R_f$  = 0.26 [20:1  $\text{CH}_2\text{Cl}_2/\text{CH}_3\text{OH}$ ], white crystal, mp. = 160-162  $^\circ\text{C}$ ):

$^1\text{H}$  NMR (500 MHz, Chloroform-*d*)  $\delta$  = 7.91 – 7.85 (m, 3H), 7.75 (h,  $J$  = 8.2, 7.7 Hz, 12H), 7.64 (d,  $J$  = 8.4 Hz, 1H), 7.41 (t,  $J$  = 7.9 Hz, 1H), 7.16 (d,  $J$  = 8.4 Hz, 2H), 7.11 (t,  $J$  = 7.7 Hz, 1H), 6.74 (d,  $J$  = 8.3 Hz, 2H), 6.48 (d,  $J$  = 8.0 Hz, 1H), 3.62 ppm (s, 2H);  $^{13}\text{C}$  NMR (126 MHz, Chloroform-*d*)  $\delta$  = 168.9 (d,  $J$  = 20.3 Hz), 154.5 (d,  $J$  = 12.8 Hz), 135.9 (d,  $J$  = 3.2 Hz), 134.2 (d,  $J$  = 11.0 Hz), 133.2 (d,  $J$  = 12.0 Hz), 130.9 (d,  $J$  = 13.2 Hz), 129.5, 128.8, 127.0 (d,  $J$  = 9.7 Hz), 126.6, 125.1, 120.9 (q,  $J$  = 320.0 Hz), 120.5, 117.3 (d,  $J$  = 92.0 Hz), 112.5, 93.0 (d,  $J$  = 112.1 Hz), 33.2 ppm;  $^{19}\text{F}$  NMR (471 MHz,  $\text{CDCl}_3$ )  $\delta$  = -78.1 ppm;  $^{31}\text{P}$  NMR (202 MHz,  $\text{CDCl}_3$ )  $\delta$  = 10.7 ppm; HRMS (ESI):  $m/z$  calcd for  $[\text{M}]^+ = \text{C}_{33}\text{H}_{25}\text{ClOP}$ : 503.1331; found: 503.1328; ATR-FTIR ( $\text{cm}^{-1}$ ):  $\bar{\nu}$  = 3063, 2923, 2247, 1552, 1262, 725, 572  $\text{cm}^{-1}$ .

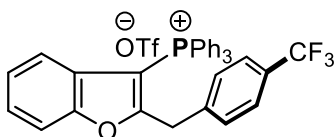

**3pa**

**Compound 3pa:** (43% yield,  $R_f$  = 0.22 [20:1  $\text{CH}_2\text{Cl}_2/\text{CH}_3\text{OH}$ ], white crystal, mp. = 105-106  $^\circ\text{C}$ ):

**<sup>1</sup>H NMR** (500 MHz, Chloroform-*d*)  $\delta$  = 7.87 (t,  $J$  = 7.2 Hz, 3H), 7.81 – 7.71 (m, 13H), 7.64 (d,  $J$  = 8.4 Hz, 1H), 7.46 (d,  $J$  = 8.1 Hz, 2H), 7.42 (d,  $J$  = 8.0 Hz, 1H), 7.12 (t,  $J$  = 7.7 Hz, 1H), 6.96 (d,  $J$  = 8.0 Hz, 2H), 6.49 (d,  $J$  = 8.0 Hz, 1H), 3.73 ppm (s, 2H); **<sup>13</sup>C NMR** (126 MHz, Chloroform-*d*)  $\delta$  = 168.3 (d,  $J$  = 20.2 Hz), 154.5 (d,  $J$  = 12.6 Hz), 138.7, 135.9 (d,  $J$  = 3.2 Hz), 134.1 (d,  $J$  = 10.9 Hz), 130.9 (d,  $J$  = 13.3 Hz), 129.5 (q,  $J$  = 32.7 Hz), 128.6, 126.9 (d,  $J$  = 9.6 Hz), 126.7, 125.6 (d,  $J$  = 3.8 Hz), 125.2, 124.9, 122.7, 120.8 (q,  $J$  = 318.8 Hz), 120.5, 117.2 (d,  $J$  = 91.9 Hz), 112.5, 93.3 (d,  $J$  = 111.9 Hz), 33.6 ppm; **<sup>31</sup>P NMR** (202 MHz, CDCl<sub>3</sub>)  $\delta$  = 10.7 ppm; **<sup>19</sup>F NMR** (471 MHz, CDCl<sub>3</sub>)  $\delta$  = -62.6, -78.2 ppm; **HRMS** (ESI):  $m/z$  calcd for [M]<sup>+</sup> = C<sub>34</sub>H<sub>25</sub>F<sub>3</sub>OP: 537.1595; found: 537.1591; **ATR-FTIR** (cm<sup>-1</sup>):  $\bar{\nu}$  = 3012, 2924, 1555, 1439, 1108, 751, 526 cm<sup>-1</sup>.

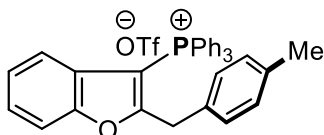

**3qa**

**Compound 3qa:** (97% yield,  $R_f$  = 0.25 [20:1 CH<sub>2</sub>Cl<sub>2</sub>/CH<sub>3</sub>OH], white crystal, mp. = 204-205 °C):

**<sup>1</sup>H NMR** (500 MHz, Chloroform-*d*)  $\delta$  = 7.91 – 7.85 (m, 3H), 7.80 – 7.71 (m, 12H), 7.65 (d,  $J$  = 8.4 Hz, 1H), 7.41 (t,  $J$  = 7.8 Hz, 1H), 7.11 (t,  $J$  = 7.6 Hz, 1H), 7.00 (d,  $J$  = 7.6 Hz, 2H), 6.65 (d,  $J$  = 7.7 Hz, 2H), 6.48 (d,  $J$  = 8.0 Hz, 1H), 3.57 (s, 2H), 2.27 ppm (s, 3H); **<sup>13</sup>C NMR** (126 MHz, Chloroform-*d*)  $\delta$  = 169.7 (d,  $J$  = 20.4 Hz), 154.4 (d,  $J$  = 12.8 Hz), 137.1, 135.9 (d,  $J$  = 3.2 Hz), 134.1 (d,  $J$  = 10.9 Hz), 131.4, 130.8 (d,  $J$  = 13.3 Hz), 129.4, 127.9, 127.0 (d,  $J$  = 9.7 Hz), 126.5, 125.1, 120.9 (q,  $J$  = 318.8 Hz), 120.5, 117.3 (d,  $J$  = 92.1 Hz), 112.4, 92.6 (d,  $J$  = 112.2 Hz), 33.4, 20.9 ppm; **<sup>31</sup>P NMR** (202 MHz, CDCl<sub>3</sub>)  $\delta$  = 10.8 ppm; **<sup>19</sup>F NMR** (471 MHz, CDCl<sub>3</sub>)  $\delta$  = -78.1 ppm; **HRMS** (ESI):  $m/z$  calcd for [M]<sup>+</sup> = C<sub>34</sub>H<sub>28</sub>OP: 483.1878; found: 483.1874; **ATR-FTIR** (cm<sup>-1</sup>):  $\bar{\nu}$  = 3059, 2920, 1438, 1273, 725, 636 cm<sup>-1</sup>.



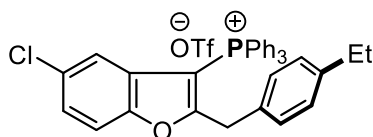

**3ra**

**Compound 3ra:** (99% yield,  $R_f = 0.33$  [20:1  $\text{CH}_2\text{Cl}_2/\text{CH}_3\text{OH}$ ], white crystal, mp. = 80-82 °C):

$^1\text{H NMR}$  (500 MHz, Chloroform- $d$ )  $\delta = 7.89$  (t,  $J = 6.0$  Hz, 3H), 7.83 – 7.70 (m, 13H), 7.58 (d,  $J = 8.7$  Hz, 1H), 7.38 – 7.31 (m, 1H), 7.01 (d,  $J = 7.8$  Hz, 2H), 6.68 (d,  $J = 7.8$  Hz, 2H), 6.33 – 6.25 (m, 1H), 3.60 (s, 2H), 2.57 (q,  $J = 7.5$  Hz, 2H), 1.18 ppm (t,  $J = 7.6$  Hz, 3H);  $^{13}\text{C NMR}$  (126 MHz, Chloroform- $d$ )  $\delta = 171.5$  (d,  $J = 20.2$  Hz), 152.9 (d,  $J = 12.4$  Hz), 143.6, 136.0 (d,  $J = 3.2$  Hz), 134.3 (d,  $J = 10.9$  Hz), 131.4, 131.0 (d,  $J = 13.3$  Hz), 130.7, 128.6 (d,  $J = 9.6$  Hz), 128.2 (d,  $J = 15.3$  Hz), 126.8, 120.8 (q,  $J = 318.8$  Hz), 119.8, 117.1 (d,  $J = 92.0$  Hz), 113.6, 92.4 (d,  $J = 112.6$  Hz), 33.8, 28.3, 15.5 ppm;  $^{31}\text{P NMR}$  (202 MHz,  $\text{CDCl}_3$ )  $\delta = 10.6$  ppm;  $^{19}\text{F NMR}$  (471 MHz,  $\text{CDCl}_3$ )  $\delta = -78.1$  ppm; **HRMS** (ESI):  $m/z$  calcd for  $[\text{M}]^+ = \text{C}_{33}\text{H}_{29}\text{ClOP}$ : 507.1645; found: 507.1823; **ATR-FTIR** ( $\text{cm}^{-1}$ ):  $\bar{\nu} = 3063, 2922, 1440, 1265, 637, 517$   $\text{cm}^{-1}$ .

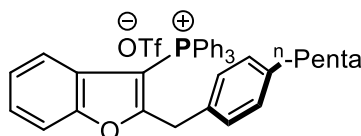

**3sa**

**Compound 3sa:** (95% yield,  $R_f = 0.27$  [20:1  $\text{CH}_2\text{Cl}_2/\text{CH}_3\text{OH}$ ], white crystal, mp. = 97-98 °C):

$^1\text{H NMR}$  (500 MHz, Chloroform- $d$ )  $\delta = 7.91 - 7.84$  (m, 3H), 7.79 – 7.69 (m, 12H), 7.65 (d,  $J = 8.4$  Hz, 1H), 7.41 (t,  $J = 7.9$  Hz, 1H), 7.11 (t,  $J = 7.7$  Hz, 1H), 7.00 (d,  $J = 7.9$  Hz, 2H), 6.67 (d,  $J = 7.9$  Hz, 2H), 6.48 (d,  $J = 8.0$  Hz, 1H), 3.58 (s, 2H), 2.55 – 2.49 (m, 2H), 1.57 – 1.50 (m, 2H), 1.36 – 1.26 (m, 4H), 0.87 ppm (t,  $J = 7.0$  Hz, 3H);  $^{13}\text{C NMR}$  (126 MHz, Chloroform- $d$ )  $\delta = 169.7$  (d,  $J = 20.5$  Hz), 154.4 (d,  $J = 12.8$  Hz), 142.2, 135.9 (d,  $J = 3.2$  Hz), 134.1 (d,  $J = 10.8$  Hz), 131.6, 130.8 (d,  $J = 13.3$  Hz), 128.7, 127.9, 127.0 (d,  $J = 9.9$  Hz), 126.5, 125.1, 120.8 (t,  $J = 318.8$  Hz), 120.5, 117.3 (d,  $J = 92.2$  Hz), 112.5, 92.6 (d,  $J = 112.2$  Hz), 35.3, 33.5, 31.3, 31.0, 22.4, 13.9 ppm;  $^{19}\text{F NMR}$

(471 MHz, CDCl<sub>3</sub>)  $\delta = -78.1$  ppm; <sup>31</sup>P NMR (202 MHz, CDCl<sub>3</sub>)  $\delta = 10.8$  ppm; HRMS (ESI):  $m/z$  calcd for [M]<sup>+</sup> = C<sub>38</sub>H<sub>36</sub>OP: 539.2504; found: 539.2484; ATR-FTIR (cm<sup>-1</sup>):  $\bar{\nu} = 3061, 2925, 1438, 1266, 1030, 636, 542$  cm<sup>-1</sup>.

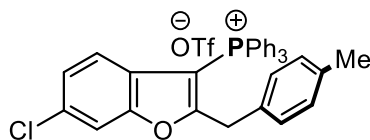

**3ta**

**Compound 3ta:** (99.5% yield,  $R_f = 0.28$  [20:1 CH<sub>2</sub>Cl<sub>2</sub>/CH<sub>3</sub>OH]), yellow crystal, mp. = 172-174 °C)

<sup>1</sup>H NMR (500 MHz, Chloroform-*d*)  $\delta = 7.91 - 7.84$  (m, 3H), 7.77 – 7.71 (m, 1H), 7.65 (d,  $J = 8.5$  Hz, 1H), 7.41 (t,  $J = 7.8$  Hz, 1H), 7.11 (t,  $J = 7.7$  Hz, 1H), 6.73 (d,  $J = 8.7$  Hz, 2H), 6.68 (d,  $J = 8.7$  Hz, 2H), 6.47 (d,  $J = 8.0$  Hz, 1H), 3.74 (s, 3H), 3.55 ppm (s, 2H); <sup>13</sup>C NMR (126 MHz, Chloroform-*d*)  $\delta = 169.9$  (d,  $J = 20.6$  Hz), 158.8, 154.4 (d,  $J = 12.8$  Hz), 135.9 (d,  $J = 3.1$  Hz), 134.1 (d,  $J = 10.9$  Hz), 130.9 (d,  $J = 13.1$  Hz), 129.1, 127.0 (d,  $J = 10.0$  Hz), 126.5, 126.3, 125.1, 120.9 (q,  $J = 320.0$  Hz), 120.4, 117.3 (d,  $J = 92.1$  Hz), 114.1, 112.4, 92.4 (d,  $J = 112.3$  Hz), 55.3, 33.0 ppm; <sup>31</sup>P NMR (202 MHz, CDCl<sub>3</sub>)  $\delta = 10.8$  ppm; <sup>19</sup>F NMR (471 MHz, CDCl<sub>3</sub>)  $\delta = -78.1$  ppm; HRMS (ESI):  $m/z$  calcd for [M]<sup>+</sup> = C<sub>34</sub>H<sub>28</sub>OP: 483.1878; found: 483.1872; ATR-FTIR (cm<sup>-1</sup>):  $\bar{\nu} = 3061, 2956, 1511, 1262, 725, 515$  cm<sup>-1</sup>.

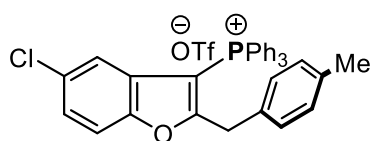

**3ua**

**Compound 3ua:** (99% yield,  $R_f = 0.28$  [20:1 CH<sub>2</sub>Cl<sub>2</sub>/CH<sub>3</sub>OH]), white crystal, mp. = 154-156 °C):

<sup>1</sup>H NMR (500 MHz, Chloroform-*d*)  $\delta = 7.89$  (td,  $J = 6.3, 5.7, 2.7$  Hz, 3H), 7.82 – 7.72 (m, 12H), 7.58 (dd,  $J = 8.8, 1.6$  Hz, 1H), 7.35 (dd,  $J = 8.9, 2.0$  Hz, 1H), 6.99 (d,  $J = 7.8$  Hz, 2H), 6.64 (d,  $J = 7.9$  Hz, 2H), 6.30 (d,  $J = 1.9$  Hz, 1H), 3.59 (s, 2H), 2.27 ppm (s, 3H) ppm; <sup>13</sup>C NMR (126 MHz, Chloroform-*d*)  $\delta = 171.4$  (d,  $J = 20.1$  Hz), 152.9 (d,  $J = 12.6$  Hz), 137.2, 136.0 (d,  $J = 3.1$  Hz), 134.2 (d,  $J = 11.0$  Hz), 131.1, 131.0 (d,  $J =$

13.2 Hz), 130.7, 129.5, 128.5 (d,  $J = 9.7$  Hz), 128.0, 126.8, 120.9 (q,  $J = 318.8$ Hz), 119.8, 117.0 (d,  $J = 92.0$  Hz), 113.6, 92.4 (d,  $J = 112.6$  Hz), 33.7, 20.9 ppm;  $^{31}\text{P}$  NMR (202 MHz,  $\text{CDCl}_3$ )  $\delta = 10.6$  ppm;  $^{19}\text{F}$  NMR (471 MHz,  $\text{CDCl}_3$ )  $\delta = -78.1$  ppm; HRMS (ESI):  $m/z$  calcd for  $[\text{M}]^+ = \text{C}_{34}\text{H}_{27}\text{ClOP}$ : 517.148; found: 517.149; ATR-FTIR ( $\text{cm}^{-1}$ ):  $\bar{\nu} = 3063, 2921, 1440, 1265, 635, 516$   $\text{cm}^{-1}$ .

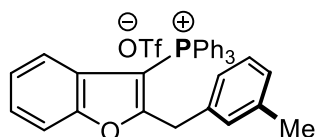

**3va**

**Compound 3va:** (86% yield,  $R_f = 0.27$  [20:1  $\text{CH}_2\text{Cl}_2/\text{CH}_3\text{OH}$ ], white crystal, mp. = 161-162  $^\circ\text{C}$ ):

$^1\text{H}$  NMR (500 MHz, Chloroform- $d$ )  $\delta = 7.91 - 7.85$  (m, 3H), 7.74 (q,  $J = 6.1, 4.1$  Hz, 12H), 7.67 (d,  $J = 8.3$  Hz, 1H), 7.42 (t,  $J = 7.8$  Hz, 1H), 7.12 (t,  $J = 7.7$  Hz, 1H), 7.07 (t,  $J = 7.6$  Hz, 1H), 7.00 (d,  $J = 7.4$  Hz, 1H), 6.56 (d,  $J = 7.4$  Hz, 2H), 6.49 (d,  $J = 12.1$  Hz, 2H), 3.61 (s, 0H), 2.21 ppm (s, 3H);  $^{13}\text{C}$  NMR (126 MHz, Chloroform- $d$ )  $\delta = 169.5$  (d,  $J = 20.3$  Hz), 154.4 (d,  $J = 12.8$  Hz), 138.4, 135.8 (d,  $J = 3.0$  Hz), 134.4, 134.1 (d,  $J = 10.9$  Hz), 130.8 (d,  $J = 13.2$  Hz), 128.7 (d,  $J = 12.1$  Hz), 128.0, 127.0 (d,  $J = 9.9$  Hz), 126.5, 125.0 (d,  $J = 22.9$  Hz), 120.9 (q,  $J = 318.8$ Hz), 120.4, 117.3 (d,  $J = 92.1$  Hz), 112.5, 92.7 (d,  $J = 112.2$  Hz), 33.8, 21.2 ppm;  $^{31}\text{P}$  NMR (202 MHz,  $\text{CDCl}_3$ )  $\delta = 10.7$  ppm;  $^{19}\text{F}$  NMR (471 MHz,  $\text{CDCl}_3$ )  $\delta = -78.0$  ppm; HRMS (ESI):  $m/z$  calcd for  $[\text{M}]^+ = \text{C}_{34}\text{H}_{28}\text{OP}$ : 483.1878; found: 483.1872; ATR-FTIR ( $\text{cm}^{-1}$ ):  $\bar{\nu} = 3066, 2921, 1546, 1453, 1262, 751, 542$   $\text{cm}^{-1}$ .

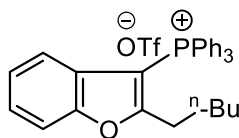

**3wa**

**Compound 3wa:** (99% yield,  $R_f = 0.30$  [20:1  $\text{CH}_2\text{Cl}_2/\text{CH}_3\text{OH}$ ], white crystal, mp. = 154-155  $^\circ\text{C}$ ):

$^1\text{H}$  NMR (500 MHz, Chloroform- $d$ )  $\delta = 7.96 - 7.89$  (m, 3H), 7.84 - 7.72 (m, 12H), 7.68 - 7.62 (m, 1H), 7.44 - 7.37 (m, 1H), 7.14 - 7.07 (m, 1H), 6.44 (d,  $J = 7.9$  Hz, 1H),

2.17 – 2.08 (m, 2H), 1.47 (p,  $J = 7.8$  Hz, 2H), 1.12 (h,  $J = 7.2$  Hz, 2H), 0.95 (p,  $J = 7.5$  Hz, 2H), 0.78 ppm (t,  $J = 7.3$  Hz, 3H);  $^{13}\text{C}$  NMR (126 MHz, Chloroform-*d*)  $\delta = 172.4$  (d,  $J = 21.0$  Hz), 154.2 (d,  $J = 12.9$  Hz), 135.9 (d,  $J = 3.0$  Hz), 134.0 (d,  $J = 10.9$  Hz), 130.8 (d,  $J = 13.2$  Hz), 126.9 (d,  $J = 9.9$  Hz), 126.3, 125.0, 120.8 (q,  $J = 318.8$  Hz), 120.2, 117.5 (d,  $J = 92.1$  Hz), 112.2, 91.4 (d,  $J = 113.3$  Hz), 31.2, 28.2, 28.0, 21.9, 13.6 ppm;  $^{19}\text{F}$  NMR (471 MHz,  $\text{CDCl}_3$ )  $\delta = -78.1$  ppm;  $^{31}\text{P}$  NMR (202 MHz,  $\text{CDCl}_3$ )  $\delta = 10.7$ ; HRMS (ESI):  $m/z$  calcd for  $[\text{M}]^+ = \text{C}_{31}\text{H}_{30}\text{OP}$ : 449.2034; found: 449.2036; ATR-FTIR ( $\text{cm}^{-1}$ ):  $\bar{\nu} = 3059, 2928, 1549, 1439, 1263, 723, 515$   $\text{cm}^{-1}$ .

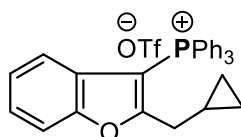

**3xa**

**Compound 3xa:** (98% yield,  $R_f = 0.35$  [20:1  $\text{CH}_2\text{Cl}_2/\text{CH}_3\text{OH}$ ], white crystal, mp. = 197-199  $^\circ\text{C}$ ):

$^1\text{H}$  NMR (500 MHz, Chloroform-*d*)  $\delta = 7.91$  (td,  $J = 5.8, 3.1$  Hz, 3H), 7.81 – 7.74 (m, 12H), 7.68 (d,  $J = 8.6$  Hz, 1H), 7.42 (t,  $J = 7.7$  Hz, 1H), 7.11 (t,  $J = 7.7$  Hz, 1H), 6.46 (d,  $J = 8.0$  Hz, 1H), 2.04 (d,  $J = 6.9$  Hz, 2H), 1.83 (s, 1H), 0.82 (ddt,  $J = 12.4, 7.5, 3.7$  Hz, 1H), 0.43 (q,  $J = 5.6$  Hz, 2H), -0.08 ppm (q,  $J = 5.1$  Hz, 2H);  $^{13}\text{C}$  NMR (126 MHz, Chloroform-*d*)  $\delta = 171.8$  (d,  $J = 20.8$  Hz), 154.4 (d,  $J = 12.8$  Hz), 135.9 (d,  $J = 3.1$  Hz), 134.1 (d,  $J = 10.9$  Hz), 130.9 (d,  $J = 13.2$  Hz), 127.0 (d,  $J = 10.0$  Hz), 126.4, 125.0, 120.9 (q,  $J = 318.8$  Hz), 120.4, 117.5 (d,  $J = 92.2$  Hz), 112.4, 91.7 (d,  $J = 113.1$  Hz), 32.4, 9.3, 4.7 ppm;  $^{19}\text{F}$  NMR (471 MHz,  $\text{CDCl}_3$ )  $\delta = -78.1$  ppm;  $^{31}\text{P}$  NMR (202 MHz,  $\text{CDCl}_3$ )  $\delta = 10.8$  ppm; HRMS (ESI):  $m/z$  calcd for  $[\text{M}]^+ = \text{C}_{30}\text{H}_{26}\text{OP}$ : 433.1721 found: 433.1731; ATR-FTIR ( $\text{cm}^{-1}$ ):  $\bar{\nu} = 3065, 3007, 1556, 1441, 1265, 721, 513$   $\text{cm}^{-1}$ .

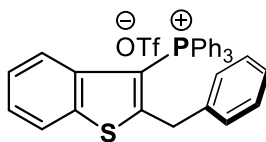

**3ya**

**Compound 3ya:** (50% yield,  $R_f = 0.30$  [20:1  $\text{CH}_2\text{Cl}_2/\text{CH}_3\text{OH}$ ], white crystal, mp. = 229-231  $^\circ\text{C}$ ):

**<sup>1</sup>H NMR** (500 MHz, Chloroform-*d*)  $\delta$  = 7.88 (d,  $J$  = 8.2 Hz, 1H), 7.84 (t,  $J$  = 7.2 Hz, 3H), 7.76 – 7.68 (m, 12H), 7.38 (t,  $J$  = 7.7 Hz, 1H), 7.25 – 7.20 (m, 3H), 7.12 (t,  $J$  = 7.8 Hz, 1H), 6.91 – 6.87 (m, 2H), 6.78 (d,  $J$  = 8.4 Hz, 1H), 3.66 ppm (s, 2H); **<sup>13</sup>C NMR** (126 MHz, Chloroform-*d*)  $\delta$  = 166.6 (d,  $J$  = 13.3 Hz), 139.6 (d,  $J$  = 14.2 Hz), 138.6 (d,  $J$  = 14.2 Hz), 137.2, 135.7 (d,  $J$  = 3.2 Hz), 134.4 (d,  $J$  = 10.9 Hz), 130.8 (d,  $J$  = 13.0 Hz), 128.8, 128.6, 127.7, 125.8 (d,  $J$  = 10.3 Hz), 123.8 (d,  $J$  = 1.7 Hz), 122.9, 120.9 (q,  $J$  = 318.8 Hz), 118.4 (d,  $J$  = 89.4 Hz), 104.3 (d,  $J$  = 94.8 Hz), 35.6 ppm (d,  $J$  = 3.0 Hz); **<sup>31</sup>P NMR** (202 MHz, CDCl<sub>3</sub>)  $\delta$  = 10.8 ppm; **<sup>19</sup>F NMR** (471 MHz, CDCl<sub>3</sub>)  $\delta$  = -78.1 ppm; **HRMS** (ESI):  $m/z$  calcd for [M]<sup>+</sup> = C<sub>33</sub>H<sub>26</sub>PS: 485.1487 found: 485.1482; **ATR-FTIR** (cm<sup>-1</sup>):  $\bar{\nu}$  = 3063, 2922, 1436, 1204, 756, 544 cm<sup>-1</sup>.

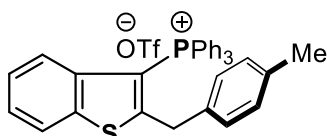

**3za**

**Compound 3za:** (51% yield,  $R_f$  = 0.30 [20:1 CH<sub>2</sub>Cl<sub>2</sub>/CH<sub>3</sub>OH], white crystal, mp. = 212-214 °C):

**<sup>1</sup>H NMR** (500 MHz, Chloroform-*d*)  $\delta$  = 7.89 – 7.82 (m, 4H), 7.75 (d,  $J$  = 7.5 Hz, 3H), 7.72 (q,  $J$  = 4.7 Hz, 9H), 7.38 (t,  $J$  = 7.7 Hz, 1H), 7.11 (t,  $J$  = 7.8 Hz, 1H), 7.04 (d,  $J$  = 7.7 Hz, 2H), 6.78 (dd,  $J$  = 11.6, 8.1 Hz, 3H), 3.58 (s, 2H), 2.30 ppm (s, 3H); **<sup>13</sup>C NMR** (126 MHz, Chloroform-*d*)  $\delta$  = 167.2 (d,  $J$  = 13.5 Hz), 139.6 (d,  $J$  = 14.2 Hz), 138.5 (d,  $J$  = 14.2 Hz), 137.6, 135.7 (d,  $J$  = 3.2 Hz), 134.3 (d,  $J$  = 10.6 Hz), 134.1, 130.8 (d,  $J$  = 13.0 Hz), 129.5, 128.5, 125.8 (d,  $J$  = 12.8 Hz), 123.7, 122.8, 120.9 (q,  $J$  = 318.8 Hz), 118.4 (d,  $J$  = 89.3 Hz), 104.1 (d,  $J$  = 95.1 Hz), 35.3 (d,  $J$  = 2.9 Hz), 21.0 ppm; **<sup>31</sup>P NMR** (202 MHz, CDCl<sub>3</sub>)  $\delta$  = 10.8 ppm; **<sup>19</sup>F NMR** (471 MHz, CDCl<sub>3</sub>)  $\delta$  = -78.0 ppm; **HRMS** (ESI):  $m/z$  calcd for [M]<sup>+</sup> = C<sub>34</sub>H<sub>28</sub>PS: 499.1644 found: 499.1649; **ATR-FTIR** (cm<sup>-1</sup>):  $\bar{\nu}$  = 3059, 2923, 1455, 1263, 725, 513 cm<sup>-1</sup>.

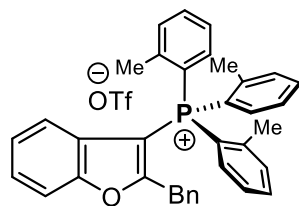

**3ab**

**Compound 3ab:** (84% yield,  $R_f = 0.30$  [20:1  $\text{CH}_2\text{Cl}_2/\text{CH}_3\text{OH}$ ], white crystal, mp. = 218-219 °C):

$^1\text{H NMR}$  (500 MHz, Chloroform- $d$ )  $\delta = 8.02 - 7.90$  (m, 1H), 7.89 – 7.77 (m, 2H), 7.76 – 7.54 (m, 9H), 7.49 – 7.34 (m, 3H), 7.24 – 7.04 (m, 4H), 6.73 (dd,  $J = 16.7, 7.0$  Hz, 1H), 6.55 (d,  $J = 7.4$  Hz, 1H), 4.16 (d,  $J = 15.8$  Hz, 1H), 3.87 (d,  $J = 15.7$  Hz, 0.5H), 3.61 (d,  $J = 16.0$  Hz, 0.5H), 2.03 (d,  $J = 10.9$  Hz, 3H), 1.93 (s, 1H), 1.88 (s, 3H), 1.78 (s, 1H), 1.67 ppm (s, 1H);  $^{13}\text{C NMR}$  (126 MHz, Chloroform- $d$ )  $\delta = 167.0$  (dd,  $J = 18.8, 21.3$  Hz), 154.7 (d,  $J = 13.0$  Hz), 144.2 (d,  $J = 17.1$  Hz), 143.8 (d,  $J = 6.4$  Hz), 143.3 (dd,  $J = 1.25, 1.25$  Hz), 136.3 (d,  $J = 17.9$  Hz), 135.7, 135.1 (d,  $J = 11.4$  Hz), 134.2 (dd,  $J = 18.1, 10.1$  Hz), 132.6 (d,  $J = 11.5$  Hz), 128.6 (d,  $J = 24.0$  Hz), 128.3 (d,  $J = 11.7$  Hz), 128.1 (d,  $J = 14.6$  Hz), 127.4 (d,  $J = 31.2$  Hz), 126.5 (d,  $J = 34.3$  Hz), 125.3 (d,  $J = 46.5$  Hz), 122.1, 120.7 (q,  $J = 318.8$  Hz), 120.3, 112.4 (d,  $J = 45.6$  Hz), 92.9 (d,  $J = 110.9$  Hz), 41.8, 34.8 (d,  $J = 286.5$  Hz), 26.8, 24.1 (d,  $J = 167.6$  Hz), 22.5 ppm (t,  $J = 21.3$  Hz);  $^{31}\text{P NMR}$  (202 MHz,  $\text{CDCl}_3$ )  $\delta = 11.2, 10.4$  ppm;  $^{19}\text{F NMR}$  (471 MHz,  $\text{CDCl}_3$ )  $\delta = -78.0$  ppm; **HRMS** (ESI):  $m/z$  calcd for  $[\text{M}]^+ = \text{C}_{36}\text{H}_{32}\text{OP}$ : 511.2186; found: 511.2187; **ATR-FTIR** ( $\text{cm}^{-1}$ ):  $\bar{\nu} = 3006, 2924, 1450, 1266, 1156, 752$   $\text{cm}^{-1}$

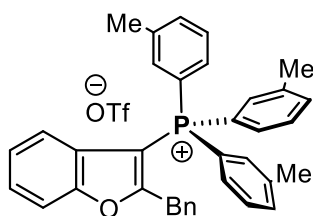

**3ac**

**Compound 3ac:** (99% yield,  $R_f = 0.35$  [20:1  $\text{CH}_2\text{Cl}_2/\text{CH}_3\text{OH}$ ], white crystal, mp. = 92-94 °C):

$^1\text{H NMR}$  (500 MHz, Chloroform- $d$ )  $\delta = 7.70 - 7.66$  (m, 5H), 7.66 – 7.63 (m, 2H), 7.52

(ddt,  $J = 13.5, 7.6, 1.7$  Hz, 3H), 7.44 – 7.39 (m, 4H), 7.21 (dd,  $J = 5.1, 1.9$  Hz, 3H), 7.17 – 7.12 (m, 1H), 6.80 – 6.73 (m, 2H), 6.51 (d,  $J = 8.0$  Hz, 1H), 3.64 (s, 2H), 2.38 ppm (s, 9H);  $^{13}\text{C}$  NMR (126 MHz, Chloroform-*d*)  $\delta = 168.8$  (d,  $J = 20.2$  Hz), 154.3 (d,  $J = 12.6$  Hz), 141.1 (d,  $J = 13.0$  Hz), 136.6 (d,  $J = 3.2$  Hz), 134.6, 133.8 (d,  $J = 10.9$  Hz), 131.3 (d,  $J = 10.7$  Hz), 130.6 (d,  $J = 14.1$  Hz), 120.8 (q,  $J = 318.8$ Hz), 128.6, 127.7, 127.2, 126.9 (d,  $J = 9.7$  Hz), 126.4, 124.9, 120.8 (t,  $J = 320.0$  Hz), 120.4, 117.2 (d,  $J = 91.4$  Hz), 112.3, 93.3 (d,  $J = 111.6$  Hz), 33.7, 21.4 ppm;  $^{19}\text{F}$  NMR (471 MHz,  $\text{CDCl}_3$ )  $\delta = -78.1$  ppm;  $^{31}\text{P}$  NMR (202 MHz,  $\text{CDCl}_3$ )  $\delta = 10.6$  ppm; HRMS (ESI):  $m/z$  calcd for  $[\text{M}]^+ = \text{C}_{36}\text{H}_{32}\text{OP}$ : 511.2191; found: 511.2189; ATR-FTIR ( $\text{cm}^{-1}$ ):  $\bar{\nu} = 3060, 2923, 1453, 1265, 1147, 752, 560$   $\text{cm}^{-1}$ .

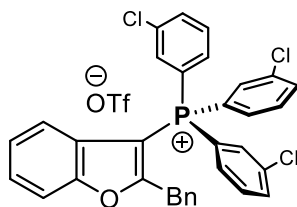

**3ad**

**Compound 3ad:** (88% yield,  $R_f = 0.35$  [20:1  $\text{CH}_2\text{Cl}_2/\text{CH}_3\text{OH}$ ], white crystal, mp. = 154-156 °C):

$^1\text{H}$  NMR (500 MHz, Chloroform-*d*)  $\delta = 7.90 - 7.79$  (m, 9H), 7.72 (d,  $J = 8.4$  Hz, 1H), 7.53 – 7.43 (m, 4H), 7.25 – 7.15 (m, 4H), 6.78 – 6.70 (m, 2H), 6.52 (d,  $J = 7.9$  Hz, 1H), 3.79 ppm (s, 2H);  $^{13}\text{C}$  NMR (126 MHz, Chloroform-*d*)  $\delta = 170.8$  (d,  $J = 21.2$  Hz), 154.5 (d,  $J = 13.3$  Hz), 137.2 (d,  $J = 17.6$  Hz), 136.5 (d,  $J = 3.0$  Hz), 134.5, 133.1, 133.1 (d,  $J = 20$  Hz), 133.0 (d,  $J = 4.2$  Hz), 132.9 (d,  $J = 3.6$  Hz), 132.9 (d,  $J = 3.6$  Hz), 129.0, 127.7, 127.5, 127.0, 126.5 (d,  $J = 10.1$  Hz), 125.5, 120.7 (q,  $J = 318.8$  Hz), 120.0, 118.6 (d,  $J = 92.1$  Hz), 112.9, 90.7 (d,  $J = 114.5$  Hz), 34.2 ppm;  $^{31}\text{P}$  NMR (202 MHz,  $\text{CDCl}_3$ )  $\delta = 10.5$  ppm;  $^{19}\text{F}$  NMR (471 MHz,  $\text{CDCl}_3$ )  $\delta = -78.2$  ppm; HRMS (ESI):  $m/z$  calcd for  $[\text{M}]^+ = \text{C}_{33}\text{H}_{23}\text{Cl}_3\text{OP}$ : 571.0552; found: 571.0551; ATR-FTIR ( $\text{cm}^{-1}$ ):  $\bar{\nu} = 3061, 2921, 1467, 1262, 1150, 753, 562$   $\text{cm}^{-1}$ .

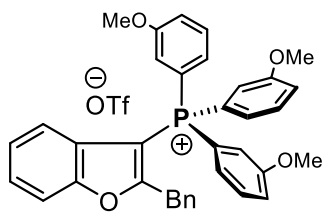

**3ae**

**Compound 3ae:** (99% yield,  $R_f = 0.30$  [20:1  $\text{CH}_2\text{Cl}_2/\text{CH}_3\text{OH}$ ], white crystal, mp. = 207-209 °C):

$^1\text{H NMR}$  (500 MHz, Chloroform-*d*)  $\delta = 7.68$  (td,  $J = 8.1, 4.7$  Hz, 4H), 7.43 (ddd,  $J = 8.4, 7.4, 1.2$  Hz, 1H), 7.39 (ddt,  $J = 8.5, 2.4, 1.1$  Hz, 3H), 7.29 (dddd,  $J = 13.2, 7.6, 1.7, 0.8$  Hz, 3H), 7.22 – 7.19 (m, 3H), 7.19 – 7.15 (m, 1H), 7.11 (dt,  $J = 15.1, 2.0$  Hz, 3H), 6.80 – 6.75 (m, 2H), 6.62 – 6.57 (m, 1H), 3.76 (s, 9H), 3.69 ppm (s, 2H);  $^{13}\text{C NMR}$  (126 MHz, Chloroform-*d*)  $\delta = 169.3$  (d,  $J = 20.4$  Hz), 160.7 (d,  $J = 17.0$  Hz), 154.4 (d,  $J = 12.5$  Hz), 134.7, 132.3 (d,  $J = 15.6$  Hz), 128.8, 127.8, 127.3, 127.0 (d,  $J = 9.7$  Hz), 126.6, 126.0 (d,  $J = 10.6$  Hz), 125.1, 120.9 (d,  $J = 3.1$  Hz), 120.9 (t,  $J = 318.8$  Hz), 120.6, 119.7 (d,  $J = 12.6$  Hz), 118.3 (d,  $J = 91.9$  Hz), 112.5, 92.9 (d,  $J = 112.3$  Hz), 55.8, 33.8 ppm;  $^{31}\text{P NMR}$  (202 MHz,  $\text{CDCl}_3$ )  $\delta = 11.4$  ppm;  $^{19}\text{F NMR}$  (471 MHz,  $\text{CDCl}_3$ )  $\delta = -78.1$  ppm; **HRMS** (ESI):  $m/z$  calcd for  $[\text{M}]^+ = \text{C}_{36}\text{H}_{32}\text{O}_4\text{P}$ : 559.2038; found: 559.2054L; **ATR-FTIR** ( $\text{cm}^{-1}$ ):  $\bar{\nu} = 3061, 2963, 1439, 1262, 1152, 726, 517$   $\text{cm}^{-1}$

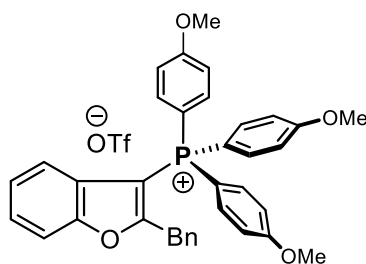

**3af**

**Compound 3af:** (69.2% yield,  $R_f = 0.25$  [20:1  $\text{CH}_2\text{Cl}_2/\text{CH}_3\text{OH}$ ], white crystal, mp. = 151-152 °C):

$^1\text{H NMR}$  (500 MHz, Chloroform-*d*)  $\delta = 7.60$  (dt,  $J = 12.8, 7.8$  Hz, 7H), 7.40 (t,  $J = 7.9$  Hz, 1H), 7.24 – 7.10 (m, 10H), 6.81 (dd,  $J = 6.6, 2.8$  Hz, 2H), 6.57 (d,  $J = 8.0$  Hz, 1H), 3.92 (s, 9H), 3.66 ppm (s, 2H);  $^{13}\text{C NMR}$  (126 MHz, Chloroform-*d*)  $\delta = 168.4$  (d,  $J =$



20.2 Hz), 165.0 (d,  $J = 3.0$  Hz), 154.3 (d,  $J = 12.5$  Hz), 135.8 (d,  $J = 12.6$  Hz), 134.8, 128.6, 127.9, 127.2 (d,  $J = 8.8$  Hz), 127.2, 126.3, 124.9, 120.7, 120.8 (q,  $J = 318.8$  Hz), 116.4 (d,  $J = 14.4$  Hz), 112.2, 108.1 (d,  $J = 100.8$  Hz), 94.8 (d,  $J = 112.2$  Hz), 55.9, 33.6 ppm;  $^{31}\text{P}$  NMR (202 MHz,  $\text{CDCl}_3$ )  $\delta = 8.6$  ppm;  $^{19}\text{F}$  NMR (471 MHz,  $\text{CDCl}_3$ )  $\delta = -78.1$  ppm; HRMS (ESI):  $m/z$  calcd for  $[\text{M}]^+ = \text{C}_{36}\text{H}_{32}\text{O}_4\text{P}$ : 559.2038; found: 559.2037; ATR-FTIR ( $\text{cm}^{-1}$ ):  $\bar{\nu} = 3095, 2942, 1592, 1269, 1104, 1029, 545$   $\text{cm}^{-1}$ .

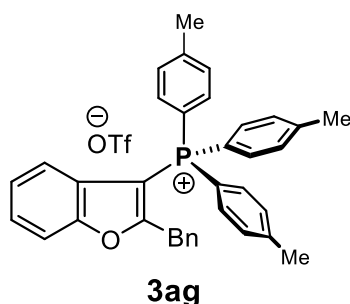

**Compound 3ag:** (96% yield,  $R_f = 0.30$  [20:1  $\text{CH}_2\text{Cl}_2/\text{CH}_3\text{OH}$ ], white crystal, mp. = 167-169  $^\circ\text{C}$ ):

$^1\text{H}$  NMR (500 MHz, Chloroform- $d$ )  $\delta = 7.64$  (d,  $J = 8.4$  Hz, 1H), 7.57 (dd,  $J = 13.2, 8.2$  Hz, 6H), 7.49 (dd,  $J = 8.1, 3.3$  Hz, 6H), 7.41 (t,  $J = 7.9$  Hz, 1H), 7.23 – 7.18 (m, 3H), 7.13 (t,  $J = 7.7$  Hz, 1H), 6.83 – 6.74 (m, 2H), 6.52 (d,  $J = 8.0$  Hz, 1H), 3.64 (s, 2H), 2.50 ppm (s, 9H);  $^{13}\text{C}$  NMR (126 MHz, Chloroform- $d$ )  $\delta = 168.8$  (d,  $J = 20.2$  Hz), 154.4 (d,  $J = 12.7$  Hz), 147.3 (d,  $J = 3.1$  Hz), 134.7, 133.9 (d,  $J = 11.4$  Hz), 131.4 (d,  $J = 13.6$  Hz), 128.7, 128.0, 127.3, 127.1 (d,  $J = 9.6$  Hz), 126.4, 125.0, 120.9 (q,  $J = 318.8$  Hz), 120.6, 114.2 (d,  $J = 94.9$  Hz), 112.3, 93.7 (d,  $J = 112.0$  Hz), 33.7, 21.8 ppm;  $^{19}\text{F}$  NMR (471 MHz,  $\text{CDCl}_3$ )  $\delta = -78.1$  ppm;  $^{31}\text{P}$  NMR (202 MHz,  $\text{CDCl}_3$ )  $\delta = 9.9$  ppm; HRMS (ESI):  $m/z$  calcd for  $[\text{M}]^+ = \text{C}_{36}\text{H}_{32}\text{OP}$ : 511.2191; found: 511.2191; ATR-FTIR ( $\text{cm}^{-1}$ ):  $\bar{\nu} = 3030, 2922, 1597, 1266, 1107, 637, 535$   $\text{cm}^{-1}$ .

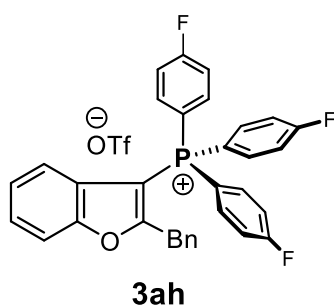

**Compound 3ah:** (89% yield,  $R_f = 0.25$  [20:1 CH<sub>2</sub>Cl<sub>2</sub>/CH<sub>3</sub>OH], white crystal, mp. = 176-178 °C):

**<sup>1</sup>H NMR** (500 MHz, Chloroform-*d*)  $\delta = 7.81$  (ddd,  $J = 12.7, 8.2, 4.8$  Hz, 6H), 7.66 (d,  $J = 8.3$  Hz, 1H), 7.41 (dt,  $J = 15.8, 7.8$  Hz, 7H), 7.23 – 7.17 (m, 3H), 7.15 (t,  $J = 7.7$  Hz, 1H), 6.76 (s, 2H), 6.50 (d,  $J = 7.9$  Hz, 1H), 3.71 ppm (s, 2H); **<sup>13</sup>C NMR** (126 MHz, Chloroform-*d*)  $\delta = 169.9$  (d,  $J = 20.8$  Hz), 168.1 (d,  $J = 3.5$  Hz), 166.0 (d,  $J = 3.3$  Hz), 154.5 (d,  $J = 12.9$  Hz), 137.2 (dd,  $J = 13.1, 9.8$  Hz), 134.7, 128.8, 127.8, 127.4, 126.8 (d,  $J = 10.1$  Hz), 126.7, 125.2, 120.7 (q,  $J = 318.8$  Hz), 120.2, 118.7 (dd,  $J = 22.3, 14.9$  Hz), 113.4 (d,  $J = 3.5$  Hz), 112.7, 112.6 (d,  $J = 3.4$  Hz), 92.5 (d,  $J = 114.3$  Hz), 33.9 ppm; **<sup>31</sup>P NMR** (202 MHz, CDCl<sub>3</sub>)  $\delta = 9.8$  ppm; **<sup>19</sup>F NMR** (471 MHz, CDCl<sub>3</sub>)  $\delta = -78.3, -98.1, -98.1$  ppm; **HRMS** (ESI):  $m/z$  calcd for [M]<sup>+</sup> = C<sub>33</sub>H<sub>23</sub>F<sub>3</sub>OP: 523.1439; found: 23.1436; **ATR-FTIR** (cm<sup>-1</sup>):  $\bar{\nu} = 3065, 2975, 1592, 1274, 1155, 835, 540$  cm<sup>-1</sup>.

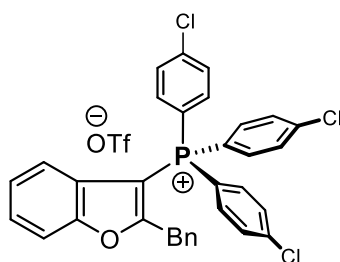

**3ai**

**Compound 3ai:** (99% yield,  $R_f = 0.30$  [20:1 CH<sub>2</sub>Cl<sub>2</sub>/CH<sub>3</sub>OH], white crystal, mp. = 84-86 °C):

**<sup>1</sup>H NMR** (500 MHz, Chloroform-*d*)  $\delta = 7.78 - 7.64$  (m, 13H), 7.59 (d,  $J = 7.5$  Hz, 1H), 7.43 (t,  $J = 7.9$  Hz, 1H), 7.19 (dd,  $J = 4.6, 2.5$  Hz, 3H), 6.80 – 6.70 (m, 2H), 6.51 (d,  $J = 8.0$  Hz, 1H), 3.76 ppm (s, 2H); **<sup>13</sup>C NMR** (126 MHz, Chloroform-*d*)  $\delta = 170.4$  (d,  $J = 21.1$  Hz), 154.5 (d,  $J = 13.1$  Hz), 143.3 (d,  $J = 3.7$  Hz), 135.6 (d,  $J = 12.4$  Hz), 134.9, 131.4 (d,  $J = 14.3$  Hz), 128.8, 127.8, 127.4, 126.8, 126.7, 125.3, 120.7 (q,  $J = 318.8$  Hz), 120.2, 115.2 (d,  $J = 95.6$  Hz), 112.8, 91.6 (d,  $J = 114.5$  Hz), 34.1 ppm; **<sup>31</sup>P NMR** (202 MHz, CDCl<sub>3</sub>)  $\delta = 10.5$  ppm; **<sup>19</sup>F NMR** (471 MHz, CDCl<sub>3</sub>)  $\delta = -78.2$  ppm; **HRMS** (ESI):  $m/z$  calcd for [M]<sup>+</sup> = C<sub>33</sub>H<sub>23</sub>Cl<sub>3</sub>OP: 571.0552; found: 571.0549; **ATR-FTIR** (cm<sup>-1</sup>):  $\bar{\nu} = 3086, 2923, 1577, 1262, 760, 559$  cm<sup>-1</sup>

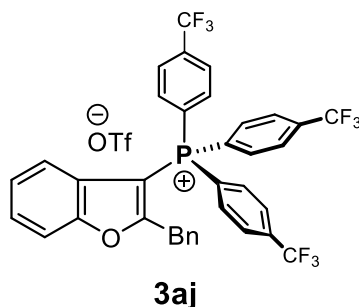

**Compound 3aj:** (98% yield,  $R_f = 0.25$  [20:1  $\text{CH}_2\text{Cl}_2/\text{CH}_3\text{OH}$ ], white crystal, mp. = 95-96 °C)

$^1\text{H NMR}$  (500 MHz, Chloroform- $d$ )  $\delta = 8.03 - 7.88$  (m, 12H), 7.70 (dd,  $J = 8.4, 2.0$  Hz, 1H), 7.46 (t,  $J = 7.9$  Hz, 1H), 7.21 - 7.09 (m, 4H), 6.63 (d,  $J = 7.2$  Hz, 2H), 6.51 (d,  $J = 8.0$  Hz, 1H), 3.83 ppm (s, 2H);  $^{13}\text{C NMR}$  (126 MHz, Chloroform- $d$ )  $\delta = 171.3$  (d,  $J = 21.5$  Hz), 154.6 (d,  $J = 13.2$  Hz), 137.4 (q,  $J = 33.8$  Hz), 135.3 (d,  $J = 11.9$  Hz), 134.9, 128.9, 127.7 (dd,  $J = 14.0, 3.8$  Hz), 127.5, 127.4, 127.0, 126.6 (d,  $J = 10.1$  Hz), 125.6, 123.7, 121.5, 120.6 (q,  $J = 318.8$  Hz), 120.7 (d,  $J = 91.6$  Hz), 120.0, 113.0, 90.0 (d,  $J = 114.6$  Hz), 34.3 ppm;  $^{19}\text{F NMR}$  (471 MHz,  $\text{CDCl}_3$ )  $\delta = -63.8, -78.5$  ppm;  $^{31}\text{P NMR}$  (202 MHz,  $\text{CDCl}_3$ )  $\delta = 10.9$  ppm; **HRMS** (ESI):  $m/z$  calcd for  $[\text{M}]^+ = \text{C}_{36}\text{H}_{23}\text{F}_9\text{OP}$ : 673.1343; found: 673.1339; **ATR-FTIR** ( $\text{cm}^{-1}$ ):  $\bar{\nu} = 3100, 2922, 1545, 1262, 1135, 714, 546$   $\text{cm}^{-1}$ .

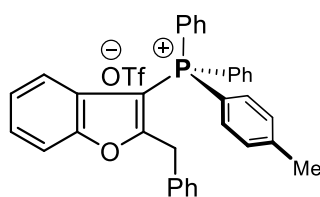

**Compound 3ak:** (98% yield,  $R_f = 0.30$  [20:1  $\text{CH}_2\text{Cl}_2/\text{CH}_3\text{OH}$ ], white crystal, mp. = 167 -168°C):

$^1\text{H NMR}$  (500 MHz, Chloroform- $d$ )  $\delta = 7.86$  (td,  $J = 6.1, 5.6, 2.6$  Hz, 2H), 7.80 - 7.69 (m, 8H), 7.67 - 7.59 (m, 3H), 7.51 (dd,  $J = 8.2, 3.5$  Hz, 2H), 7.44 - 7.38 (m, 1H), 7.23 - 7.16 (m, 3H), 7.12 (t,  $J = 7.7$  Hz, 1H), 6.82 - 6.73 (m, 2H), 6.50 (d,  $J = 8.0$  Hz, 1H),

3.64 (s, 2H), 2.51 ppm (s, 3H);  $^{13}\text{C}$  NMR (126 MHz, Chloroform-*d*)  $\delta$  = 169.2(d,  $J$  = 20.3 Hz), 154.4 (d,  $J$  = 12.8 Hz), 147.5 (d,  $J$  = 3.1 Hz), 135.7 (d,  $J$  = 3.1 Hz), 134.6, 134.0 (dd,  $J$  = 11.2, 3.8 Hz), 131.5 (d,  $J$  = 13.6 Hz), 130.7 (d,  $J$  = 13.1 Hz), 128.7, 127.9, 127.3, 127.0 (d,  $J$  = 9.7 Hz), 126.5, 125.0, 120.8 (q,  $J$  = 318.8Hz), 120.5, 117.6 (d,  $J$  = 92.2 Hz), 113.4 (d,  $J$  = 94.5 Hz), 112.4, 93.1 (d,  $J$  = 112.1 Hz), 33.7, 21.8 ppm;  $^{31}\text{P}$  NMR (202 MHz,  $\text{CDCl}_3$ )  $\delta$  = 10.5 ppm;  $^{19}\text{F}$  NMR (471 MHz,  $\text{CDCl}_3$ )  $\delta$  = -78.1; HRMS (ESI):  $m/z$  calcd for  $[\text{M}]^+ = \text{C}_{34}\text{H}_{28}\text{OP}$ : 483.1878; found: 483.1880; ATR-FTIR ( $\text{cm}^{-1}$ ):  $\bar{\nu}$  = 3063, 2923, 1439, 1273, 1107, 753, 543  $\text{cm}^{-1}$ .

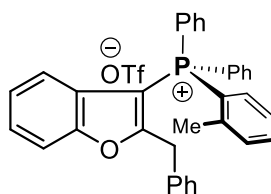

**3al**

**Compound 3al:** (99% yield,  $R_f$  = 0.30 [20:1  $\text{CH}_2\text{Cl}_2/\text{CH}_3\text{OH}$ ], white crystal, mp. = 206-208  $^\circ\text{C}$ ):

$^1\text{H}$  NMR (500 MHz, Chloroform-*d*)  $\delta$  = 7.89 – 7.81 (m, 3H), 7.77 – 7.71 (m, 8H), 7.65 (d,  $J$  = 8.5 Hz, 1H), 7.62 – 7.58 (m, 1H), 7.49 (dt,  $J$  = 7.6, 3.8 Hz, 1H), 7.42 (dt,  $J$  = 15.9, 7.7 Hz, 2H), 7.22 – 7.17 (m, 3H), 7.10 (t,  $J$  = 7.7 Hz, 1H), 6.74 (dd,  $J$  = 6.3, 2.5 Hz, 2H), 6.50 (d,  $J$  = 8.0 Hz, 1H), 3.77 (s, 2H), 2.06 ppm (s, 3H);  $^{13}\text{C}$  NMR (126 MHz, Chloroform-*d*)  $\delta$  = 168.4 (d,  $J$  = 20.4 Hz), 154.4 (d,  $J$  = 12.8 Hz), 143.8 (d,  $J$  = 9.6 Hz), 136.3 (d,  $J$  = 3.0 Hz), 135.8, 135.6 (d,  $J$  = 3.2 Hz), 134.3 (d,  $J$  = 6.1 Hz), 134.1, 133.8 (d,  $J$  = 10.9 Hz), 131.0 (d,  $J$  = 13.3 Hz), 128.8, 128.2 (d,  $J$  = 13.5 Hz), 127.4, 126.8 (d,  $J$  = 9.8 Hz), 126.6, 125.1, 120.9 (q,  $J$  = 318.8 Hz), 120.2, 117.7 (d,  $J$  = 91.4 Hz), 115.5 (d,  $J$  = 90.5 Hz), 112.4, 93.3 (d,  $J$  = 110.9 Hz), 34.0, 23.1 ppm (d,  $J$  = 5.4 Hz);  $^{19}\text{F}$  NMR (471 MHz,  $\text{CDCl}_3$ )  $\delta$  = -78.0 ppm;  $^{31}\text{P}$  NMR (202 MHz,  $\text{CDCl}_3$ )  $\delta$  = 10.8 ppm; HRMS (ESI):  $m/z$  calcd for  $[\text{M}]^+ = \text{C}_{34}\text{H}_{28}\text{OP}$ : 483.1878; found: 483.1873; ATR-FTIR ( $\text{cm}^{-1}$ ):  $\bar{\nu}$  = 3063, 2966, 1450, , 1270, 1149, 753, 545  $\text{cm}^{-1}$ .

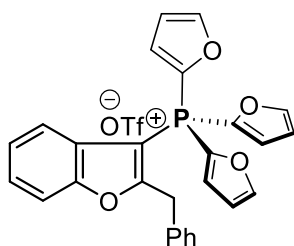

**3am**

**Compound 3am:** (58% yield,  $R_f = 0.50$  [10:1  $\text{CH}_2\text{Cl}_2/\text{CH}_3\text{OH}$ ], white crystal, mp. = 111-113 °C):

$^1\text{H NMR}$  (500 MHz, Chloroform-*d*)  $\delta = 8.12 - 8.10$  (m, 2H), 7.65 (dt,  $J = 3.7, 2.0$  Hz, 4H), 7.46 – 7.42 (m, 1H), 7.30 – 7.24 (m, 3H), 7.03 – 6.97 (m, 2H), 6.90 (dt,  $J = 3.7, 1.8$  Hz, 3H), 6.85 (d,  $J = 8.0$  Hz, 1H), 6.81 – 6.78 (m, 1H), 6.41 (dt,  $J = 3.3, 1.7$  Hz, 1H), 3.82 ppm (s, 2H);  $^{13}\text{C NMR}$  (126 MHz, Chloroform-*d*)  $\delta = 170.4$  (d,  $J = 24.3$  Hz), 154.7 (d,  $J = 14.7$  Hz), 154.4 (d,  $J = 9.4$  Hz), 134.1, 132.0 (d,  $J = 24.3$  Hz), 130.5, 129.3, 128.9, 128.3, 127.6, 126.8, 125.9 (d,  $J = 12.4$  Hz), 125.5, 120.9 (q,  $J = 318.8$  Hz), 119.7, 114.0 (d,  $J = 10.5$  Hz), 112.5, 90.0 (d,  $J = 130.7$  Hz), 34.0 ppm;  $^{19}\text{F NMR}$  (471 MHz,  $\text{CDCl}_3$ )  $\delta = -78.2$  ppm;  $^{31}\text{P NMR}$  (202 MHz,  $\text{CDCl}_3$ )  $\delta = -29.7$  ppm; **HRMS** (ESI):  $m/z$  calcd for  $[\text{M}]^+ = \text{C}_{27}\text{H}_{20}\text{O}_4\text{P}$ : 439.1099; found: 439.1096; **ATR-FTIR** ( $\text{cm}^{-1}$ ):  $\bar{\nu} = 3118, 2992, 1452, 1271, 1033, 765 \text{ cm}^{-1}$ .

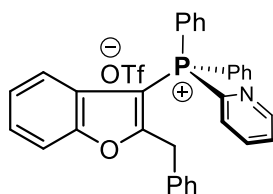

**3an**

**Compound 3an:** (93% yield,  $R_f = 0.40$  [10:1  $\text{CH}_2\text{Cl}_2/\text{CH}_3\text{OH}$ ], red crystal, mp. = 222-224 °C):

$^1\text{H NMR}$  (500 MHz, Chloroform-*d*)  $\delta = 9.23$  (d,  $J = 6.4$  Hz, 1H), 8.00 (t,  $J = 7.6$  Hz, 1H), 7.91 – 7.85 (m, 2H), 7.71 (dd,  $J = 16.0, 7.5$  Hz, 4H), 7.56 – 7.51 (m, 3H), 7.48 (dt,  $J = 12.3, 6.1$  Hz, 5H), 7.44 – 7.36 (m, 4H), 7.36 – 7.30 (m, 1H), 6.96 (t,  $J = 7.6$  Hz, 1H), 6.82 (d,  $J = 8.2$  Hz, 1H), 5.22 ppm (s, 2H);  $^{13}\text{C NMR}$  (126 MHz, Chloroform-*d*)  $\delta = 164.0$  (d,  $J = 10.9$  Hz), 158.4 (d,  $J = 2.3$  Hz), 144.5, 143.2, 137.1, 134.2, 132.8 (d,

$J = 2.2$  Hz), 132.1 (d,  $J = 3.6$  Hz), 130.3 (d,  $J = 11.4$  Hz), 129.8(t,  $J = 17.5$  Hz), 129.2 (d,  $J = 3.4$  Hz), 129.1, 128.3, 128.0, 127.7, 123.5 (d,  $J = 16.8$  Hz), 122.0 (d,  $J = 7.8$  Hz), 120.9, 120.9 (q,  $J = 318.8$  Hz), 120.7, 116.7 (d,  $J = 22.1$  Hz), 113.9 (d,  $J = 3.7$  Hz), 32.3 ppm (d,  $J = 13.3$  Hz);  $^{31}\text{P}$  NMR (202 MHz,  $\text{CDCl}_3$ )  $\delta = -59.2$  ppm;  $^{19}\text{F}$  NMR (471 MHz,  $\text{CDCl}_3$ )  $\delta = -78.2$  ppm; HRMS (ESI):  $m/z$  calcd for  $[\text{M}]^+ = \text{C}_{32}\text{H}_{25}\text{NOP}$ : 470.1674; found: 470.1672; ATR-FTIR ( $\text{cm}^{-1}$ ):  $\bar{\nu} = 3057, 2920, 1600, 1461, 1262, 738, 540$   $\text{cm}^{-1}$ .

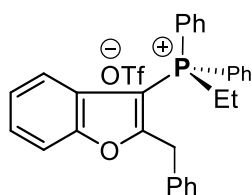

**3ao**

**Compound 3ao:** (63% yield,  $R_f = 0.40$  [20:1  $\text{CH}_2\text{Cl}_2/\text{CH}_3\text{OH}$ ], white crystal, mp. = 142-144  $^\circ\text{C}$ ):

$^1\text{H}$  NMR (500 MHz, Chloroform- $d$ )  $\delta = 7.85 - 7.74$  (m, 6H), 7.65 (ddd,  $J = 8.4, 7.0, 3.1$  Hz, 5H), 7.41 (ddd,  $J = 8.4, 7.3, 1.2$  Hz, 1H), 7.25 - 7.17 (m, 4H), 6.88 - 6.77 (m, 3H), 3.91 (s, 2H), 3.51 - 3.41 (m, 2H), 1.34 ppm (dt,  $J = 21.0, 7.5$  Hz, 3H);  $^{13}\text{C}$  NMR (126 MHz, Chloroform- $d$ )  $\delta = 168.4$  (d,  $J = 19.4$  Hz), 154.5 (d,  $J = 12.4$  Hz), 135.3 (d,  $J = 3.1$  Hz), 134.7, 132.9 (d,  $J = 10.4$  Hz), 130.7 (d,  $J = 12.8$  Hz), 128.9, 128.1, 127.4, 126.8 (d,  $J = 9.7$  Hz), 126.4, 124.9, 120.8 (q,  $J = 318.8$  Hz), 120.5, 117.9 (d,  $J = 88.2$  Hz), 112.4, 92.7 (d,  $J = 105.7$  Hz), 34.5, 16.9 (d,  $J = 54.8$  Hz), 7.0 ppm (d,  $J = 5.4$  Hz);  $^{19}\text{F}$  NMR (471 MHz,  $\text{CDCl}_3$ )  $\delta = -78.2$  ppm;  $^{31}\text{P}$  NMR (202 MHz,  $\text{CDCl}_3$ )  $\delta = 16.1$  ppm; HRMS (ESI):  $m/z$  calcd for  $[\text{M}]^+ = \text{C}_{29}\text{H}_{26}\text{OP}$ : 421.1721; found: 421.1718; ATR-FTIR ( $\text{cm}^{-1}$ ):  $\bar{\nu} = 3062, 2920, 1439, 1263, 1030, 753, 637$   $\text{cm}^{-1}$ .

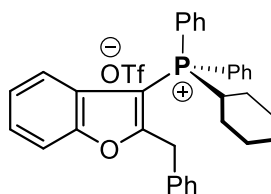

**3ap**

**Compound 3ap:** (80% yield,  $R_f = 0.40$  [20:1  $\text{CH}_2\text{Cl}_2/\text{CH}_3\text{OH}$ ], white crystal, mp. =

147-149 °C):

**<sup>1</sup>H NMR** (500 MHz, Chloroform-*d*)  $\delta$  = 7.90 (dd,  $J$  = 12.5, 7.5 Hz, 4H), 7.75 – 7.69 (m, 2H), 7.63 (td,  $J$  = 7.6, 3.5 Hz, 5H), 7.43 (t,  $J$  = 7.5 Hz, 1H), 7.31 – 7.21 (m, 4H), 6.98 (d,  $J$  = 8.0 Hz, 1H), 6.95 – 6.90 (m, 2H), 4.22 (q,  $J$  = 12.0 Hz, 1H); 3.97 (s, 2H), 2.16 (s, 2H), 1.89 – 1.73 (m, 6H), 1.21 – 1.11 ppm (m, 2H); **<sup>13</sup>C NMR** (126 MHz, Chloroform-*d*)  $\delta$  = 167.9 (d,  $J$  = 18.3 Hz), 154.7 (d,  $J$  = 12.3 Hz), 134.9 (d,  $J$  = 3.0 Hz), 134.4, 133.0 (d,  $J$  = 9.8 Hz), 130.7 (d,  $J$  = 12.5 Hz), 128.9, 128.3, 127.5, 126.9 (d,  $J$  = 9.3 Hz), 126.4, 124.9, 121.3, 120.9 (q,  $J$  = 318.8 Hz), 117.7 (d,  $J$  = 85.4 Hz), 112.3, 92.1 (d,  $J$  = 101.6 Hz), 35.17, 30.8 (d,  $J$  = 49.0 Hz), 27.0 (d,  $J$  = 3.3 Hz), 25.2 (d,  $J$  = 15.0 Hz), 25.2 ppm (d,  $J$  = 1.8 Hz); **<sup>19</sup>F NMR** (471 MHz, CDCl<sub>3</sub>)  $\delta$  = -78.1 ppm; **<sup>31</sup>P NMR** (202 MHz, CDCl<sub>3</sub>)  $\delta$  = 18.0 ppm; **HRMS** (ESI):  $m/z$  calcd for [M]<sup>+</sup> = C<sub>33</sub>H<sub>32</sub>OP: 475.2191; found: 475.2191; **ATR-FTIR** (cm<sup>-1</sup>):  $\bar{\nu}$  = 3061, 2935, 1454, 1262, 1031, 637, 517 cm<sup>-1</sup>.

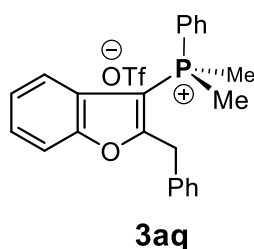

**Compound 3aq:** (97% yield,  $R_f$  = 0.50 [20:1 CH<sub>2</sub>Cl<sub>2</sub>/CH<sub>3</sub>OH], white crystal, mp. = 117-119 °C):

**<sup>1</sup>H NMR** (500 MHz, Chloroform-*d*)  $\delta$  = 7.81 – 7.73 (m, 2H), 7.71 – 7.65 (m, 1H), 7.61 – 7.55 (m, 3H), 7.38 (t,  $J$  = 7.8 Hz, 1H), 7.29 (t,  $J$  = 7.2 Hz, 2H), 7.24 (td,  $J$  = 7.6, 2.7 Hz, 2H), 7.10 (dd,  $J$  = 16.8, 7.6 Hz, 3H), 4.32 (s, 2H), 2.58 ppm (d,  $J$  = 14.2 Hz, 6H); **<sup>13</sup>C NMR** (126 MHz, Chloroform-*d*)  $\delta$  = 167.1 (d,  $J$  = 20.2 Hz), 154.4 (d,  $J$  = 12.7 Hz), 135.4, 134.9 (d,  $J$  = 3.1 Hz), 131.6 (d,  $J$  = 11.4 Hz), 130.3 (d,  $J$  = 13.2 Hz), 129.1, 128.1, 127.5, 126.5 (d,  $J$  = 10.1 Hz), 126.2, 124.9, 120.3 (d,  $J$  = 90.6 Hz), 120.7 (q,  $J$  = 318.8 Hz), 119.8, 112.3, 94.6 (d,  $J$  = 106.6 Hz), 34.4, 10.5 ppm (d,  $J$  = 58.1 Hz); **<sup>31</sup>P NMR** (202 MHz, CDCl<sub>3</sub>)  $\delta$  = 12.6 ppm; **<sup>19</sup>F NMR** (471 MHz, CDCl<sub>3</sub>)  $\delta$  = -78.3 ppm; **HRMS** (ESI):  $m/z$  calcd for [M]<sup>+</sup> = C<sub>23</sub>H<sub>22</sub>OP: 345.1408; found: 345.1412; **ATR-FTIR** (cm<sup>-1</sup>):

$\bar{\nu} = 3061, 2915, 1547, 1262, 750, 637 \text{ cm}^{-1}$ .

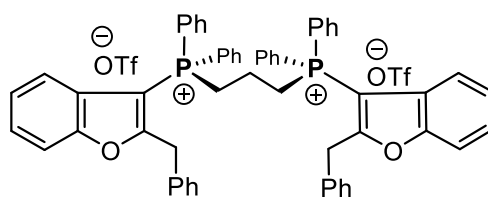

**3ar**

**Compound 3ar:** (94% yield,  $R_f = 0.25$  [20:1  $\text{CH}_2\text{Cl}_2/\text{CH}_3\text{OH}$ ], white crystal, mp. = 197-199 °C):

$^1\text{H NMR}$  (500 MHz, Chloroform- $d$ )  $\delta = 7.73$  (dd,  $J = 12.5, 7.9$  Hz, 8H), 7.67 (t,  $J = 7.4$  Hz, 4H), 7.56 – 7.47 (m, 10H), 7.29 (d,  $J = 7.8$  Hz, 2H), 7.16 – 7.07 (m, 6H), 6.95 (t,  $J = 7.7$  Hz, 2H), 6.78 – 6.70 (m, 4H), 6.61 (d,  $J = 8.0$  Hz, 2H), 4.04 (t,  $J = 13.8$  Hz, 4H), 3.81 (s, 4H), 2.00 ppm (s, 2H);  $^{13}\text{C NMR}$  (126 MHz, Chloroform- $d$ )  $\delta = 169.2$  (t,  $J = 10$  Hz), 154.4 (t,  $J = 6.25$  Hz), 135.2, 135.0, 133.3 (p,  $J = 6.7$  Hz), 130.6 (p,  $J = 6.3$  Hz), 128.7, 128.3, 127.1, 126.9 (t,  $J = 5$  Hz), 125.9, 124.5, 120.7 (q,  $J = 318.8$  Hz), 120.5, 120.4, 117.2 (d,  $J = 89.7$  Hz), 112.3, 92.5 (d,  $J = 108.2$  Hz), 34.4, 29.5 (d,  $J = 47.5$  Hz), 23.1 (m,  $J = 18.8$  Hz), 18.3 ppm;  $^{19}\text{F NMR}$  (471 MHz,  $\text{CDCl}_3$ )  $\delta = -78.3$  ppm;  $^{31}\text{P NMR}$  (202 MHz,  $\text{CDCl}_3$ )  $\delta = 13.2$  ppm; **HRMS** (ESI):  $m/z$  calcd for  $[\text{M}]^+ = \text{C}_{57}\text{H}_{48}\text{O}_2\text{P}_2$ : 826.3130 found: 826.3135; **ATR-FTIR** ( $\text{cm}^{-1}$ ):  $\bar{\nu} = 3065, 2916, 1541, 1439, 1273, 732 \text{ cm}^{-1}$ .

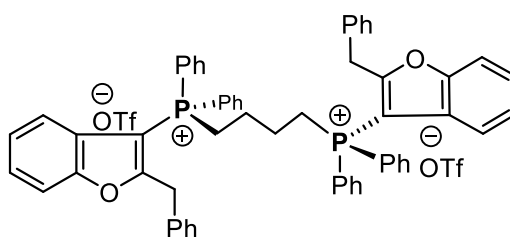

**3as**

**Compound 3as:** (62% yield,  $R_f = 0.30$  [20:1  $\text{CH}_2\text{Cl}_2/\text{CH}_3\text{OH}$ ], white crystal, mp. = 197-199 °C):

$^1\text{H NMR}$  (500 MHz, Chloroform- $d$ )  $\delta = 7.84 - 7.77$  (m, 8H), 7.74 – 7.71 (m, 4H), 7.64 (td,  $J = 7.7, 3.5$  Hz, 8H), 7.57 (d,  $J = 8.4$  Hz, 2H), 7.37 – 7.32 (m, 2H), 7.16 – 7.08 (m, 8H), 6.83 – 6.76 (m, 6H), 3.91 (s, 4H), 3.45 (t,  $J = 13.9$  Hz, 4H), 2.10 – 1.98 ppm (m,



4H);  $^{13}\text{C}$  NMR (126 MHz, Chloroform-*d*)  $\delta$  = 168.7 (d,  $J$  = 20.0 Hz), 154.5 (d,  $J$  = 12.8 Hz), 135.2 (d,  $J$  = 2.8 Hz), 135.1, 133.4 (d,  $J$  = 10.8 Hz), 130.7 (d,  $J$  = 13.3 Hz), 128.5 (d,  $J$  = 50.0 Hz), 127.2, 127.0 (d,  $J$  = 10.1 Hz), 126.1, 124.8, 120.8 (q,  $J$  = 318.8 Hz), 120.7, 117.7 (d,  $J$  = 88.6 Hz), 112.3, 93.0 (d,  $J$  = 106.7 Hz), 34.4, 23.6 (dd,  $J$  = 20.3, 3.7 Hz), 22.7 ppm (d,  $J$  = 54.6 Hz);  $^{19}\text{F}$  NMR (471 MHz,  $\text{CDCl}_3$ )  $\delta$  = -78.2, -78.2 ppm;  $^{31}\text{P}$  NMR (202 MHz,  $\text{CDCl}_3$ )  $\delta$  = 13.5 ppm; HRMS (ESI):  $m/z$  calcd for  $[\text{M}]^+$  =  $\text{C}_{58}\text{H}_{50}\text{O}_2\text{P}_2$ : 840.3286 found: 840.3299; ATR-FTIR ( $\text{cm}^{-1}$ ):  $\bar{\nu}$  = 3062, 2917, 1439, 1259, 748, 516  $\text{cm}^{-1}$ .

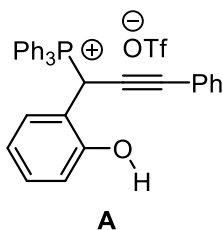

**Compound A:** (99% yield,  $R_f$  = 0.25 [20:1  $\text{CH}_2\text{Cl}_2/\text{CH}_3\text{OH}$ ], white crystal, mp. = 160-162  $^\circ\text{C}$ ):

$^1\text{H}$  NMR (500 MHz, Chloroform-*d*)  $\delta$  = 7.86 (dq,  $J$  = 6.3, 3.6, 2.8 Hz, 3H), 7.71 – 7.65 (m, 11H), 7.37 (t,  $J$  = 7.5 Hz, 1H), 7.30 (t,  $J$  = 7.6 Hz, 2H), 7.19 (d,  $J$  = 7.6 Hz, 3H), 7.10 (d,  $J$  = 8.2 Hz, 1H), 6.93 – 6.88 (m, 1H), 6.71 (t,  $J$  = 7.5 Hz, 1H), 6.47 (d,  $J$  = 18.1 Hz, 1H), 1.74 ppm (s, 1H);  $^{13}\text{C}$  NMR (126 MHz, Chloroform-*d*)  $\delta$  = 154.9 (d,  $J$  = 5.5 Hz), 135.7 (d,  $J$  = 3.1 Hz), 134.3 (d,  $J$  = 9.0 Hz), 131.5 (d,  $J$  = 3.0 Hz), 131.4 (d,  $J$  = 3.5 Hz), 130.1 (d,  $J$  = 12.4 Hz), 129.6, 129.5 (d,  $J$  = 4.1 Hz), 128.6, 120.5 (q,  $J$  = 318.8 Hz), 120.3 (dd,  $J$  = 94.1, 3.4 Hz), 116.9 (d,  $J$  = 2.8 Hz), 116.7 (d,  $J$  = 83.7 Hz), 114.4 (d,  $J$  = 5.9 Hz), 89.5 (d,  $J$  = 9.6 Hz), 81.5 (d,  $J$  = 9.6 Hz), 41.9, 30.5 (d,  $J$  = 50.2 Hz), 25.9 ppm (d,  $J$  = 260.9 Hz);  $^{31}\text{P}$  NMR (202 MHz,  $\text{CDCl}_3$ )  $\delta$  = 23.0 ppm;  $^{19}\text{F}$  NMR (471 MHz,  $\text{CDCl}_3$ )  $\delta$  = -78.2 ppm; HRMS (ESI):  $m/z$  calcd for  $[\text{M}]^+$  =  $\text{C}_{33}\text{H}_{26}\text{OP}$ : 469.1721 found: 469.1716; ATR-FTIR ( $\text{cm}^{-1}$ ):  $\bar{\nu}$  = 3059, 2864, 1439, 1238, 1025, 749, 516  $\text{cm}^{-1}$ .

## 4. Relative Configuration Assignment of A and 3aa by X-Ray

### Crystallographic Analysis:

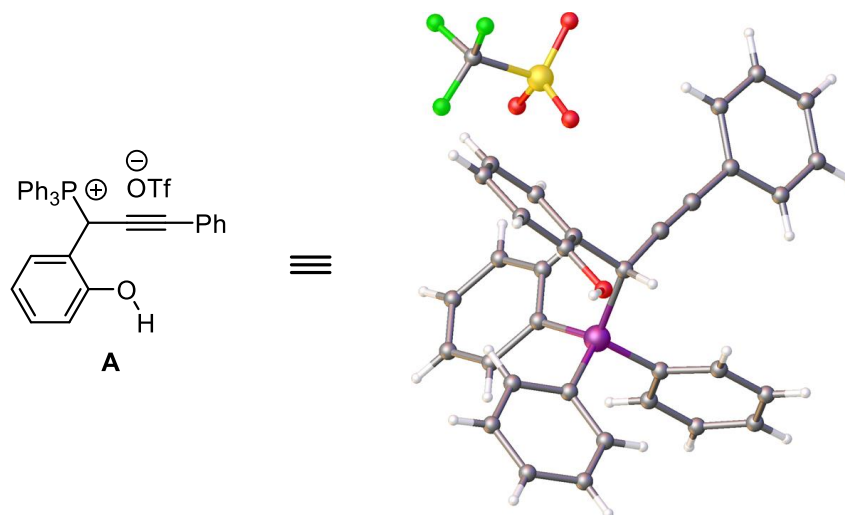

Table 2 Crystal data and structure refinement for A.

|                       |                                                                  |
|-----------------------|------------------------------------------------------------------|
| Identification code   | <b>A</b>                                                         |
| CCDC                  | 2218943                                                          |
| Empirical formula     | C <sub>34</sub> H <sub>26</sub> F <sub>3</sub> O <sub>4</sub> PS |
| Formula weight        | 618.58                                                           |
| Temperature/K         | 298(2)                                                           |
| Crystal system        | triclinic                                                        |
| Space group           | P-1                                                              |
| a/Å                   | 9.3536(8)                                                        |
| b/Å                   | 11.2590(9)                                                       |
| c/Å                   | 14.7083(12)                                                      |
| α/°                   | 91.052(1)                                                        |
| β/°                   | 92.132(3)                                                        |
| γ/°                   | 90.8130(10)                                                      |
| Volume/Å <sup>3</sup> | 1547.5(2)                                                        |

|                                                |                                                               |
|------------------------------------------------|---------------------------------------------------------------|
| Z                                              | 2                                                             |
| $\rho_{\text{calc}}/\text{cm}^3$               | 1.328                                                         |
| $\mu/\text{mm}^{-1}$                           | 0.211                                                         |
| F(000)                                         | 640.0                                                         |
| Crystal size/ $\text{mm}^3$                    | $0.45 \times 0.41 \times 0.4$                                 |
| Radiation                                      | MoK $\alpha$ ( $\lambda = 0.71073$ )                          |
| 2 $\Theta$ range for data collection/ $^\circ$ | 4.358 to 50.036                                               |
| Index ranges                                   | $-11 \leq h \leq 11, -12 \leq k \leq 13, -14 \leq l \leq 17$  |
| Reflections collected                          | 7806                                                          |
| Independent reflections                        | 5365 [ $R_{\text{int}} = 0.0298, R_{\text{sigma}} = 0.0409$ ] |
| Data/restraints/parameters                     | 5365/0/389                                                    |
| Goodness-of-fit on $F^2$                       | 1.036                                                         |
| Final R indexes [ $I \geq 2\sigma(I)$ ]        | $R_1 = 0.0574, wR_2 = 0.1531$                                 |
| Final R indexes [all data]                     | $R_1 = 0.0798, wR_2 = 0.1679$                                 |
| Largest diff. peak/hole / $e \text{ \AA}^{-3}$ | 0.41/-0.48                                                    |

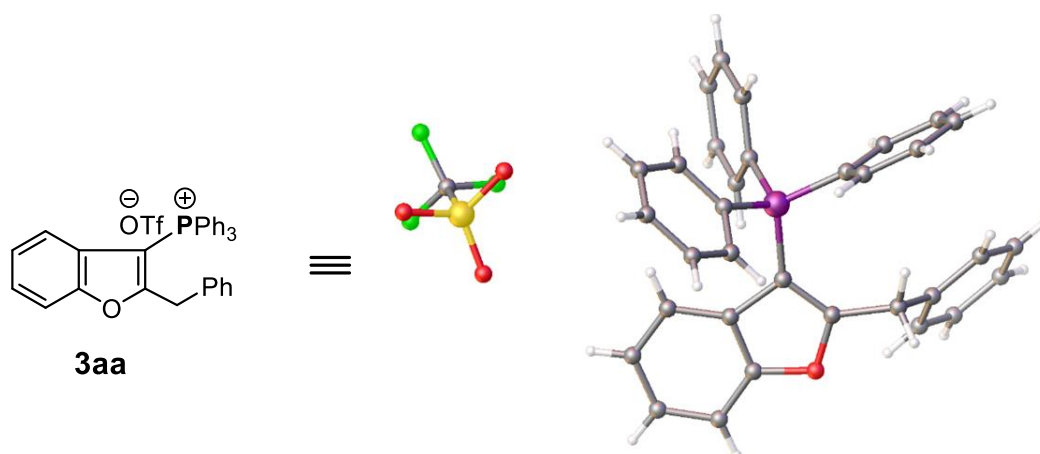

**Table 3 Crystal data and structure refinement for 3aa.**

|                     |                                                           |
|---------------------|-----------------------------------------------------------|
| Identification code | <b>3aa</b>                                                |
| CCDC                | 2218944                                                   |
| Empirical formula   | $\text{C}_{34}\text{H}_{26}\text{F}_3\text{O}_4\text{PS}$ |
| Formula weight      | 618.58                                                    |

|                                             |                                                                |
|---------------------------------------------|----------------------------------------------------------------|
| Temperature/K                               | 298 (2)                                                        |
| Crystal system                              | triclinic                                                      |
| Space group                                 | P-1                                                            |
| a/Å                                         | 9.7924(8)                                                      |
| b/Å                                         | 10.8723(9)                                                     |
| c/Å                                         | 16.3126(14)                                                    |
| $\alpha$ /°                                 | 98.275(2)                                                      |
| $\beta$ /°                                  | 97.020(2)                                                      |
| $\gamma$ /°                                 | 116.223(4)                                                     |
| Volume/Å <sup>3</sup>                       | 1507.6(2)                                                      |
| Z                                           | 2                                                              |
| $\rho_{\text{calc}}$ /cm <sup>3</sup>       | 1.367                                                          |
| $\mu$ /mm <sup>-1</sup>                     | 0.217                                                          |
| F(000)                                      | 640.0                                                          |
| Crystal size/mm <sup>3</sup>                | 0.41 × 0.21 × 0.1                                              |
| Radiation                                   | MoK $\alpha$ ( $\lambda$ = 0.71073)                            |
| 2 $\Theta$ range for data collection/°      | 4.28 to 50.04                                                  |
| Index ranges                                | -11 ≤ h ≤ 11, -8 ≤ k ≤ 12, -19 ≤ l ≤ 16                        |
| Reflections collected                       | 7386                                                           |
| Independent reflections                     | 5199 [ $R_{\text{int}}$ = 0.0373, $R_{\text{sigma}}$ = 0.0741] |
| Data/restraints/parameters                  | 5199/0/388                                                     |
| Goodness-of-fit on F <sup>2</sup>           | 0.974                                                          |
| Final R indexes [ $I \geq 2\sigma(I)$ ]     | $R_1$ = 0.0708, $wR_2$ = 0.1739                                |
| Final R indexes [all data]                  | $R_1$ = 0.1108, $wR_2$ = 0.1939                                |
| Largest diff. peak/hole / e Å <sup>-3</sup> | 0.49/-0.55                                                     |

---

## 5. Deuteration of 2-benzofuranyl phosphonium salts

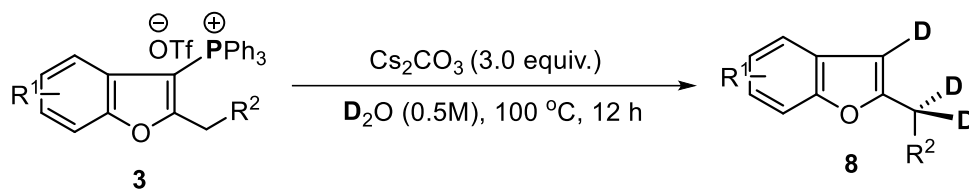

The reactions were performed in a sealed tube with **3** (1.0 equiv.), Cs<sub>2</sub>CO<sub>3</sub> (3.0 equiv.) in D<sub>2</sub>O (0.2 M) at 100 °C for 12 h under N<sub>2</sub>. The reaction mixture was then washed with aqueous 1N HCl (10.0 mL) and extracted with ethyl acetate (2 × 10 mL). The combined organic phases were washed with water (10.0 mL), brine solution (10 mL) and dried over anhydrous sodium sulfate, and evaporated. The residue was purified by chromatography to give **8** (65%-97%).

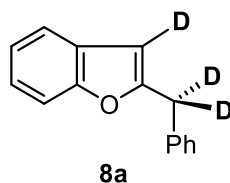

**Compound 8a:** (80% yield, *R<sub>f</sub>* = 0.60 [petroleum ether], colourless oil):

**<sup>1</sup>H NMR** (500 MHz, Chloroform-*d*)  $\delta$  = 7.46 (dd, *J* = 7.4, 1.6 Hz, 1H), 7.43 – 7.37 (m, 1H), 7.35 – 7.28 (m, 4H), 7.27 – 7.23 (m, 1H), 7.18 (dtd, *J* = 18.0, 7.3, 1.4 Hz, 2H); **<sup>13</sup>C NMR** (126 MHz, CDCl<sub>3</sub>)  $\delta$  = 157.7, 155.0, 137.2, 128.9, 128.6, 126.8, 123.4, 122.5, 120.4, 110.9, 103.2 (t, *J* = 27.5 Hz), 34.4 ppm (m, *J* = 21.2 Hz); **HRMS** (ESI): *m/z* calcd for C<sub>15</sub>H<sub>9</sub>D<sub>3</sub>ONa: 234.0974; found: 234.0945 [*M* + Na]<sup>+</sup>; **ATR-FTIR** (cm<sup>-1</sup>):  $\bar{\nu}$  = 2922, 2853, 1617, 1105, 804, 473 cm<sup>-1</sup>.

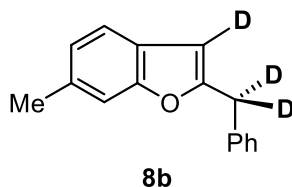

**Compound 8b:** (80% yield, *R<sub>f</sub>* = 0.60 [petroleum ether], colourless oil):

**<sup>1</sup>H NMR** (500 MHz, Chloroform-*d*)  $\delta$  = 7.32 (d, *J* = 7.6 Hz, 1H), 7.31 – 7.28 (m, 3H), 7.28 (d, *J* = 1.7 Hz, 1H), 7.26 (d, *J* = 4.5 Hz, 1H), 7.25 – 7.21 (m, 2H), 7.00 (dd, *J* =

8.4, 1.8 Hz, 1H), 2.40 (s, 3H);  $^{13}\text{C}$  NMR (126 MHz,  $\text{CDCl}_3$ )  $\delta$  = 157.8, 153.4, 137.3, 131.9, 128.9, 128.9, 128.6, 126.7, 124.6, 120.3, 110.4, 102.9 (t,  $J$  = 27.5 Hz), 34.4 ppm (m,  $J$  = 20.0 Hz); **HRMS** (ESI):  $m/z$  calcd for  $\text{C}_{16}\text{H}_{12}\text{D}_3\text{O}$ : 226.1306; found: 226.1342  $[M + \text{H}]^+$ ; **ATR-FTIR** ( $\text{cm}^{-1}$ ):  $\bar{\nu}$  = 3026, 2922, 1469, 1261, 799, 704  $\text{cm}^{-1}$ .

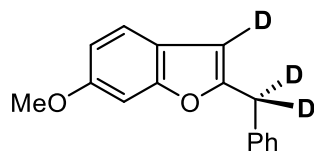

**8c**

**Compound 8c:** (85% yield,  $R_f$  = 0.60 [petroleum ether], brown oil):

$^1\text{H}$  NMR (500 MHz, Chloroform- $d$ )  $\delta$  = 7.34 – 7.31 (m, 1H), 7.31 – 7.28 (m, 3H), 7.27 (dd,  $J$  = 3.2, 1.3 Hz, 1H), 7.26 – 7.22 (m, 1H), 6.93 (d,  $J$  = 2.6 Hz, 1H), 6.80 (dd,  $J$  = 8.8, 2.6 Hz, 1H), 3.80 (s, 3H);  $^{13}\text{C}$  NMR (126 MHz,  $\text{CDCl}_3$ )  $\delta$  = 158.5, 155.8, 149.9, 137.2, 129.3, 128.8, 128.6, 126.7, 111.8, 111.2, 103.3, 103.3 (t,  $J$  = 26.9 Hz), 55.9, 34.4 ppm (m,  $J$  = 18.8 Hz); **HRMS** (ESI):  $m/z$  calcd for  $\text{C}_{16}\text{H}_{11}\text{D}_3\text{O}_2\text{Na}$ : 264.1075; found: 264.1008  $[M + \text{Na}]^+$ ; **ATR-FTIR** ( $\text{cm}^{-1}$ ):  $\bar{\nu}$  = 3024, 2956, 1473, 1200, 1028, 807, 707  $\text{cm}^{-1}$ .

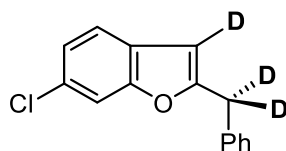

**8d**

**Compound 8d:** (97% yield,  $R_f$  = 0.50 [petroleum ether], white crystal, mp. = 43-45°C):

$^1\text{H}$  NMR (500 MHz, Chloroform- $d$ )  $\delta$  = 7.40 (d,  $J$  = 1.8 Hz, 1H), 7.34 (d,  $J$  = 8.3 Hz, 1H), 7.33 – 7.30 (m, 2H), 7.30 – 7.25 (m, 3H), 7.14 ppm (dd,  $J$  = 8.2, 1.8 Hz, 1H);  $^{13}\text{C}$  NMR (126 MHz,  $\text{CDCl}_3$ )  $\delta$  = 158.6, 155.0, 136.8, 129.1, 128.9, 128.6, 127.4, 126.9, 123.2, 120.8, 111.5, 102.9 (t,  $J$  = 27.5 Hz), 33.3 ppm (m,  $J$  = 20.0 Hz); **HRMS** (ESI):  $m/z$  calcd for  $\text{C}_{15}\text{H}_8\text{D}_3\text{ClONa}$ : 268.0579; found: 268.0575  $[M + \text{Na}]^+$ ; **ATR-FTIR** ( $\text{cm}^{-1}$ ):  $\bar{\nu}$  = 2923, 2853, 1654, 1466, 1056, 705  $\text{cm}^{-1}$ .

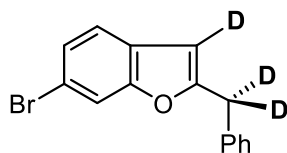

**8e**

**Compound 8e:** (80% yield,  $R_f = 0.50$  [petroleum ether], colourless oil):

$^1\text{H NMR}$  (500 MHz, Chloroform- $d$ )  $\delta = 7.57$  (d,  $J = 2.0$  Hz, 1H), 7.32 (dd,  $J = 8.0, 6.7$  Hz, 2H), 7.28 (td,  $J = 4.5, 2.1$  Hz, 3H), 7.25 ppm (d,  $J = 8.4$  Hz, 2H);  $^{13}\text{C NMR}$  (126 MHz,  $\text{CDCl}_3$ )  $\delta = 159.2, 153.7, 136.7, 130.7, 128.9, 128.7, 126.9, 126.2, 123.0, 115.6, 112.3, 102.7$  (t,  $J = 26.3$  Hz), 34.3 ppm (m,  $J = 20.0$  Hz); **HRMS** (ESI):  $m/z$  calcd for  $\text{C}_{15}\text{H}_9\text{D}_3\text{BrO}$ : 290.0255; found: 290.0247 [ $M + \text{H}$ ] $^+$ ; **ATR-FTIR** ( $\text{cm}^{-1}$ ):  $\bar{\nu} = 3026, 2923, 1448, 1258, 704$   $\text{cm}^{-1}$ .

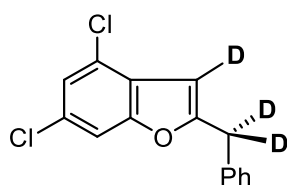

**8f**

**Compound 8f:** (74% yield,  $R_f = 0.60$  [petroleum ether], colourless oil):

$^1\text{H NMR}$  (500 MHz, Chloroform- $d$ )  $\delta = 7.34$  (dd,  $J = 8.1, 6.8$  Hz, 2H), 7.30 (d,  $J = 1.7$  Hz, 2H), 7.29 (d,  $J = 1.4$  Hz, 1H), 7.27 (d,  $J = 7.1$  Hz, 1H), 7.21 ppm (d,  $J = 2.0$  Hz, 1H);  $^{13}\text{C NMR}$  (126 MHz,  $\text{CDCl}_3$ )  $\delta = 160.6, 149.4, 136.2, 131.1, 129.0, 128.8, 128.3, 127.1, 123.6, 118.7, 116.8, 103.5$  (t,  $J = 26.3$  Hz), 34.3 ppm (m,  $J = 18.8$  Hz); **HRMS** (ESI):  $m/z$  calcd for  $\text{C}_{15}\text{H}_8\text{D}_3\text{Cl}_2\text{O}$ : 280.0370; found: 280.0435 [ $M + \text{H}$ ] $^+$ ; **ATR-FTIR** ( $\text{cm}^{-1}$ ):  $\bar{\nu} = 3084, 2924, 1444, 1169, 857, 700$   $\text{cm}^{-1}$ .

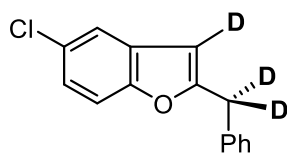

**8g**

**Compound 8g:** (88% yield,  $R_f = 0.50$  [petroleum ether], colourless oil):

$^1\text{H NMR}$  (500 MHz, Chloroform- $d$ )  $\delta = 7.42$  (d,  $J = 2.2$  Hz, 1H), 7.35 – 7.30 (m, 3H),

7.29 (d,  $J = 1.7$  Hz, 2H), 7.25 (d,  $J = 10.2$  Hz, 1H), 7.15 ppm (dd,  $J = 8.7, 2.2$  Hz, 1H);  $^{13}\text{C}$  NMR (126 MHz,  $\text{CDCl}_3$ )  $\delta = 159.4, 153.4, 136.7, 130.1, 128.9, 128.7, 128.1, 126.9, 123.5, 112.0, 111.8, 102.8$  (t,  $J = 26.2$  Hz), 34.4 ppm (m,  $J = 20.0$  Hz); **HRMS** (ESI):  $m/z$  calcd for  $\text{C}_{15}\text{H}_8\text{D}_3\text{ClOK}$ : 284.0319; found: 284.0271 [ $M + \text{K}$ ] $^+$ ; **ATR-FTIR** ( $\text{cm}^{-1}$ ):  $\bar{\nu} = 3027, 2923, 1450, 1255, 705$   $\text{cm}^{-1}$ .

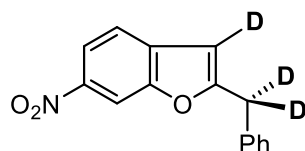

**8h**

**Compound 8h:** (76% yield,  $R_f = 0.40$  [petroleum ether], white crystal, mp. = 92-94°C):  $^1\text{H}$  NMR (500 MHz, Chloroform- $d$ )  $\delta = 8.31$  (d,  $J = 2.4$  Hz, 1H), 8.07 (dd,  $J = 9.0, 2.4$  Hz, 1H), 7.38 (d,  $J = 9.0$  Hz, 1H), 7.28 (dd,  $J = 8.1, 6.8$  Hz, 2H), 7.23 ppm (dt,  $J = 8.2, 2.5$  Hz, 3H);  $^{13}\text{C}$  NMR (126 MHz,  $\text{CDCl}_3$ )  $\delta = 160.4, 156.8, 143.1, 135.0, 128.1, 127.9, 127.8, 126.2, 118.5, 115.9, 110.2, 102.9$  (t,  $J = 27.5$  Hz), 33.4 ppm (m,  $J = 17.5$  Hz); **HRMS** (ESI):  $m/z$  calcd for  $\text{C}_{15}\text{H}_9\text{D}_3\text{NO}_3$ : 257.1000; found: 257.0978 [ $M + \text{H}$ ] $^+$ ; **ATR-FTIR** ( $\text{cm}^{-1}$ ):  $\bar{\nu} = 3087, 2921, 1519, 1339, 1057, 708$   $\text{cm}^{-1}$ .

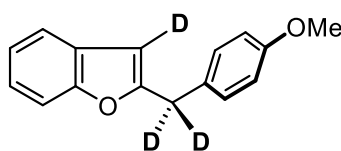

**8i**

**Compound 8i:** (65% yield,  $R_f = 0.50$  [petroleum ether], white crystal, mp. = 57-58°C):  $^1\text{H}$  NMR (500 MHz, Chloroform- $d$ )  $\delta = 7.45$  (dt,  $J = 7.3, 1.0$  Hz, 1H), 7.41 – 7.37 (m, 1H), 7.25 – 7.19 (m, 3H), 7.19 – 7.13 (m, 1H), 6.88 – 6.84 (m, 2H), 3.79 ppm (s, 3H);  $^{13}\text{C}$  NMR (126 MHz,  $\text{CDCl}_3$ )  $\delta = 158.5, 155.0, 129.9, 129.2, 128.8, 123.3, 122.5, 120.3, 114.0, 110.9, 102.9$  (t,  $J = 27.0$  Hz), 55.3, 33.5 ppm (m,  $J = 18.8$  Hz); **HRMS** (ESI):  $m/z$  calcd for  $\text{C}_{16}\text{H}_{11}\text{D}_3\text{O}_2\text{Na}$ : 264.1075; found: 264.1061 [ $M + \text{Na}$ ] $^+$ ; **ATR-FTIR** ( $\text{cm}^{-1}$ ):  $\bar{\nu} = 2922, 1617, 1247, 729, 492$   $\text{cm}^{-1}$ .



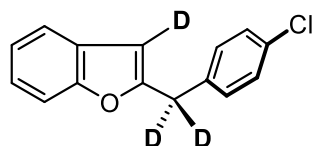

**8j**

**Compound 8j:** (88% yield,  $R_f = 0.50$  [petroleum ether], yellow crystal, mp. = 59-60°C):  $^1\text{H NMR}$  (500 MHz, Chloroform- $d$ )  $\delta = 7.47$  (dd,  $J = 7.4, 1.6$  Hz, 1H), 7.40 (d,  $J = 8.0$  Hz, 1H), 7.28 (d,  $J = 8.5$  Hz, 2H), 7.24 – 7.19 (m, 3H), 7.18 ppm (dd,  $J = 7.5, 1.3$  Hz, 1H);  $^{13}\text{C NMR}$  (126 MHz,  $\text{CDCl}_3$ )  $\delta = 157.0, 155.0, 135.7, 132.7, 130.3, 128.8, 128.6, 123.6, 122.6, 120.5, 111.0, 103.3$  (t,  $J = 26.2$  Hz), 34.8 ppm (m,  $J = 20.0$  Hz); **HRMS** (ESI):  $m/z$  calcd for  $\text{C}_{15}\text{H}_8\text{D}_3\text{ClONa}$ : 268.0579; found: 268.0541 [ $M + \text{Na}$ ] $^+$ ; **ATR-FTIR** ( $\text{cm}^{-1}$ ):  $\bar{\nu} = 3057, 2922, 1489, 1248, 935, 751$   $\text{cm}^{-1}$ .

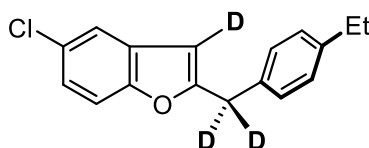

**8k**

**Compound 8k:** (92% yield,  $R_f = 0.40$  [petroleum ether], brown oil):  $^1\text{H NMR}$  (500 MHz, Chloroform- $d$ )  $\delta = 7.41$  (d,  $J = 2.2$  Hz, 1H), 7.29 (d,  $J = 8.7$  Hz, 1H), 7.20 (d,  $J = 8.1$  Hz, 2H), 7.17 – 7.12 (m, 3H), 2.63 (q,  $J = 7.6$  Hz, 2H), 1.23 (t,  $J = 7.6$  Hz, 3H);  $^{13}\text{C NMR}$  (126 MHz,  $\text{CDCl}_3$ )  $\delta = 159.7, 153.3, 142.9, 133.9, 130.1, 128.8, 128.2, 128.0, 123.5, 119.9, 111.8, 102.7$  (t,  $J = 26.2$  Hz), 34.0 (m,  $J = 18.8$  Hz); 28.5, 15.6 ppm; **HRMS** (ESI):  $m/z$  calcd for  $\text{C}_{17}\text{H}_{12}\text{D}_3\text{ClONa}$ : 296.0892; found: 296.0793 [ $M + \text{Na}$ ] $^+$ ; **ATR-FTIR** ( $\text{cm}^{-1}$ ):  $\bar{\nu} = 3021, 2964, 1451, 1256, 800$   $\text{cm}^{-1}$ .

## 6. Reference

1. a) Saha S.; Schneider C. *Org. Lett.* **2015**, *17*, 648. b) Rajesh M.; Thirupathi N.; Reddy T. J.; Kanojiya, S.; Reddy M. S. *J. Org. Chem.* **2014**, *80*, 12311. c) Kumar G. R.; Kumar, Y. K.; Kant R.; Reddy M. S. *Org. Biomol. Chem.* **2016**, *14*, 4077. d) Harkat,

H.; Blanc, A.; Weibel, J.-M.; Pale, P *J. Org. Chem.* **2008**, *73*, 1620. e) Yoshida, M.; Fujino, Y.; Doi, T. *Org. Lett.* **2011**, *13*, 4526. f) Tian, T.; Li, L.; Xue, J.; Zhang, J.; Li, Y. *J. Org. Chem.* **2015**, *80*, 4189. g) Du, J.-Y.; Ma, Y.-H.; Meng, F.-X. Meng; B.-L. Chen; Zhang, S.-L. ; Li, Q.-L. ; Gong, S.-W.; Wang, D.-Q. and Ma, C.-L.. *Org. Lett.* **2018**, *20*, 4371. h) Du, J.Y., Ma, Y.-H., Yuan, R.-Q., Xin, N., Nie, S.-Z., Ma, C.-L., Li, C.-Z., Zhao, C.-Q. *Org. Lett.* **2018**, *20*, 477. i) Gabriele, B., Mancuso, R., Lupinaci, E., Veltri, L., Salerno, G., Carfagna, C. *J. Org. Chem.* **2011**, *76*, 8277.

## 7. Copies of NMR Spectra



$^{19}\text{F}$  NMR (471 MHz,  $\text{CDCl}_3$ ) of compound **3aa**

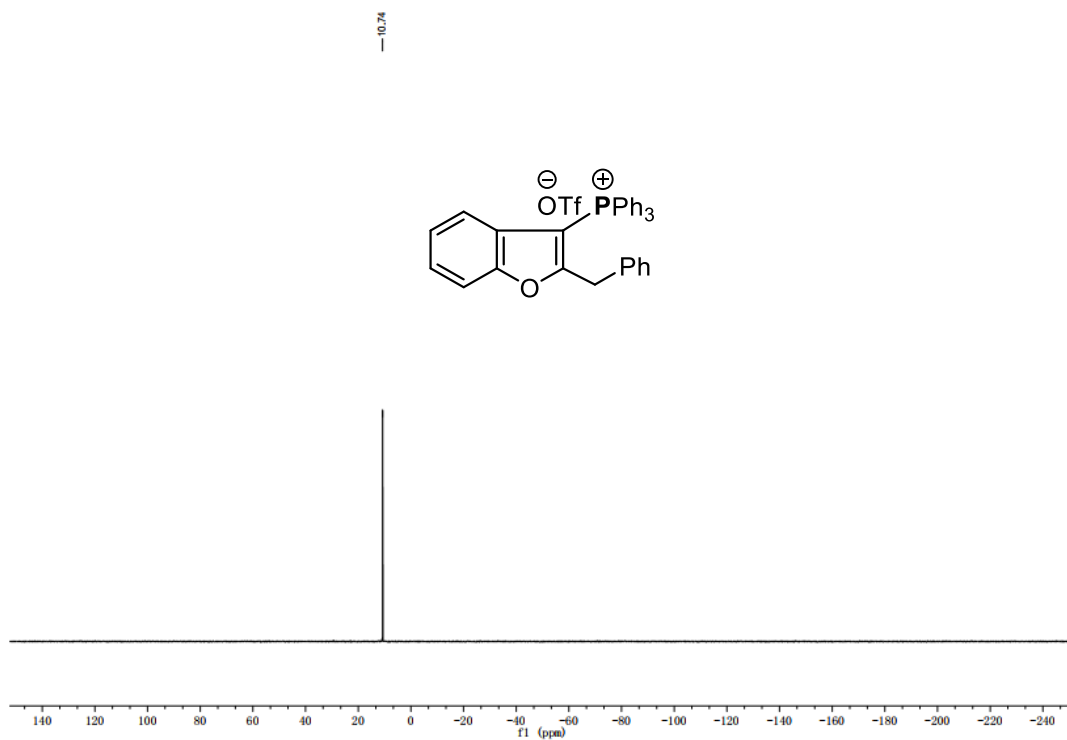

$^{31}\text{P}$  NMR (202 MHz,  $\text{CDCl}_3$ ) of compound **3aa**

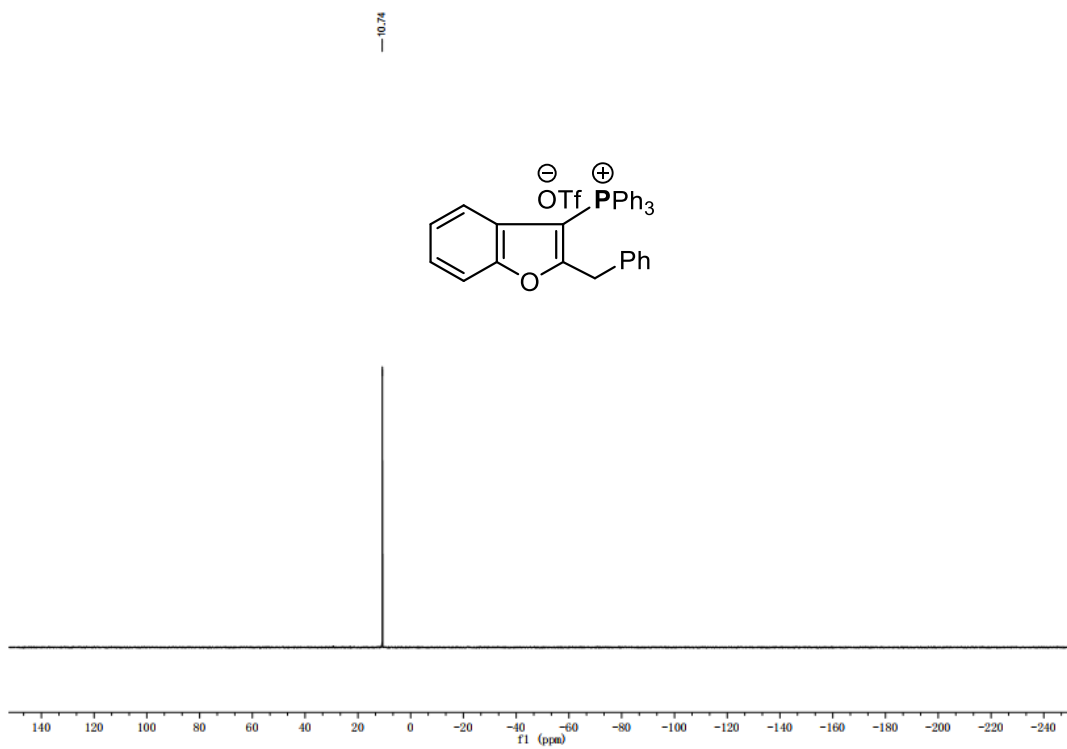

<sup>1</sup>H NMR (500 MHz, CDCl<sub>3</sub>) of compound **4aa**

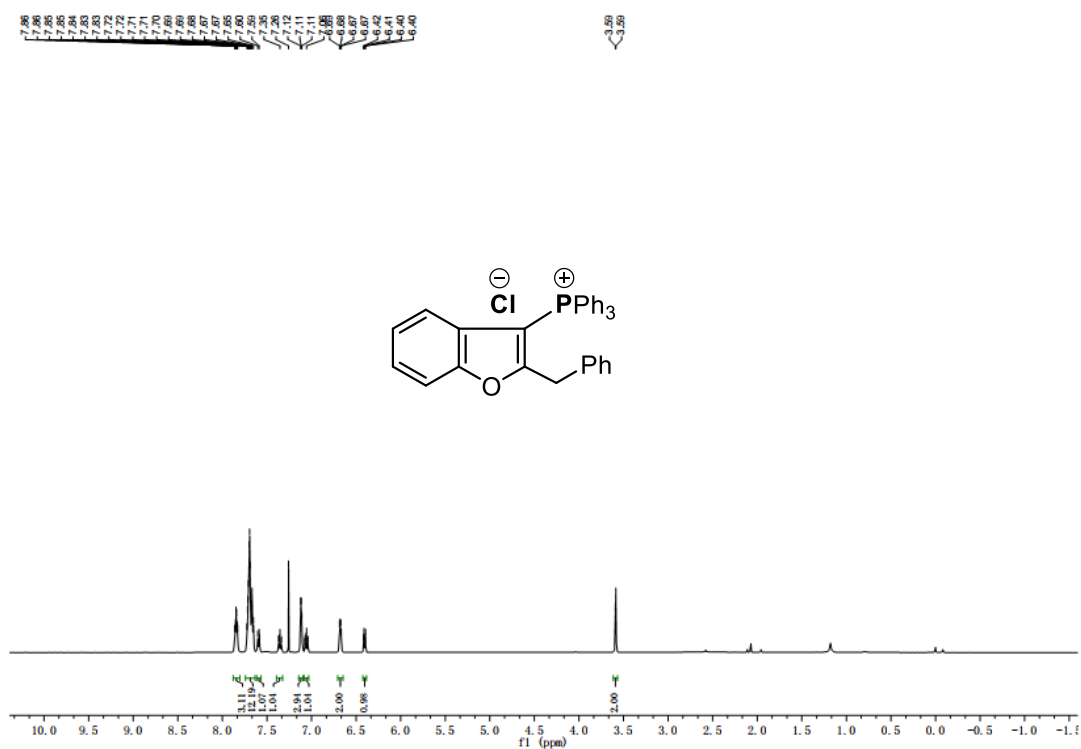

<sup>13</sup>C NMR (126 MHz, CDCl<sub>3</sub>) of compound **4aa**

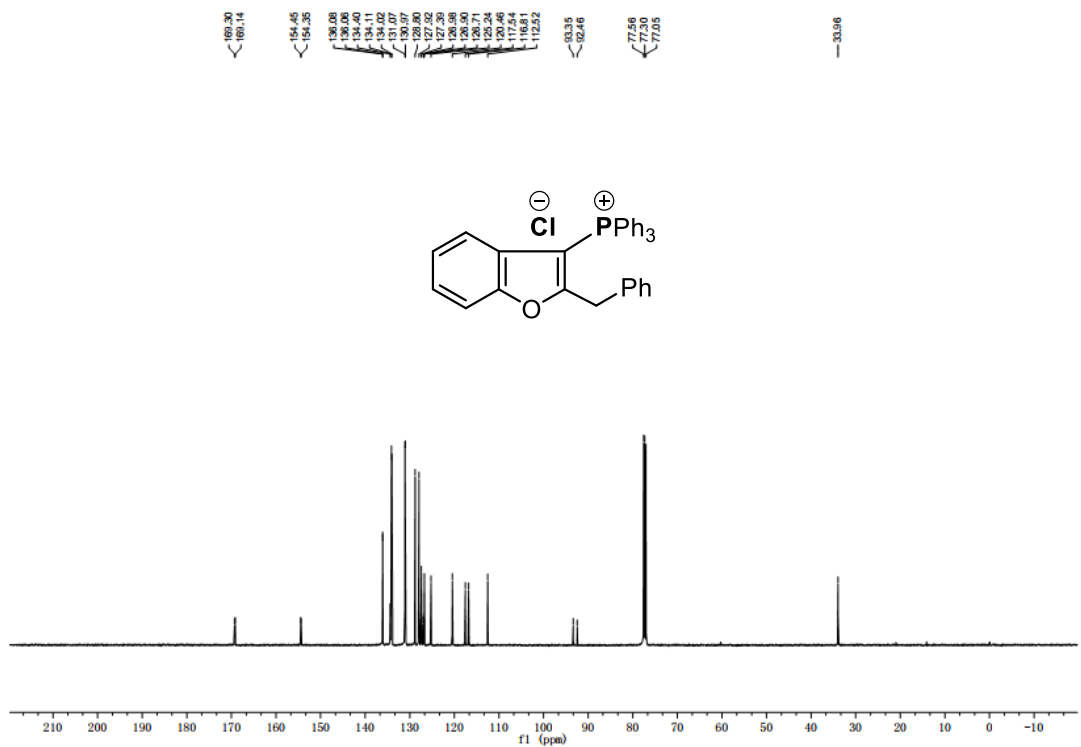

$^{31}\text{P}$  NMR (202 MHz,  $\text{CDCl}_3$ ) of compound **4aa**

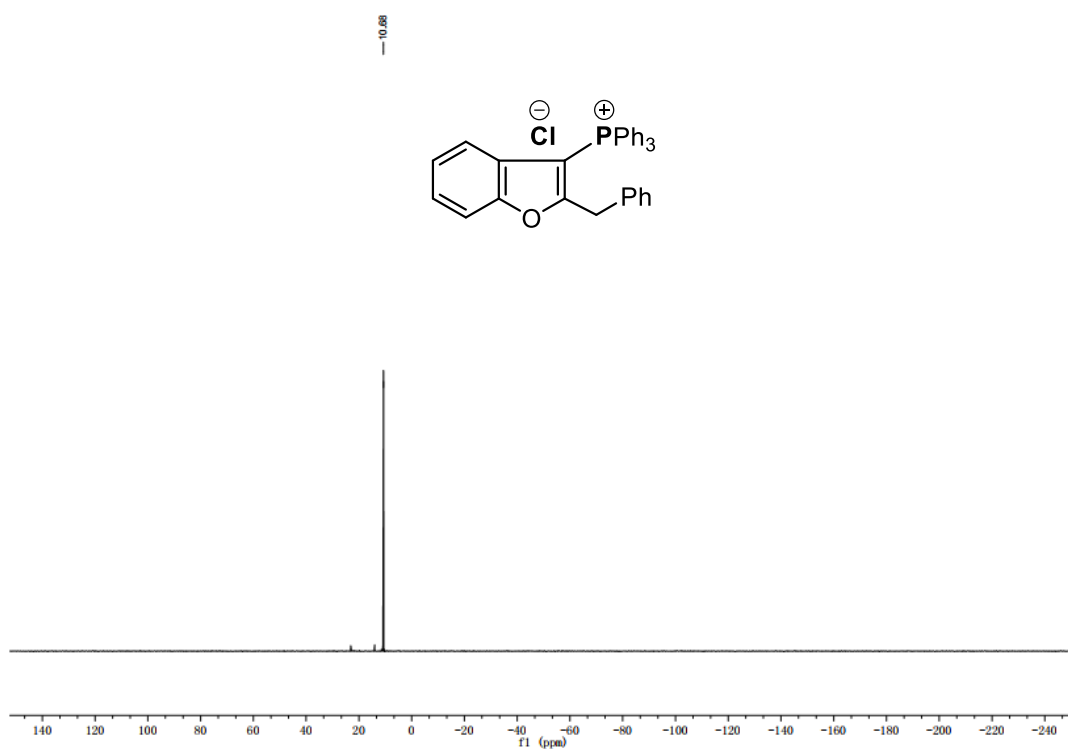

$^1\text{H}$  NMR (500 MHz,  $\text{CDCl}_3$ ) of compound **5aa**

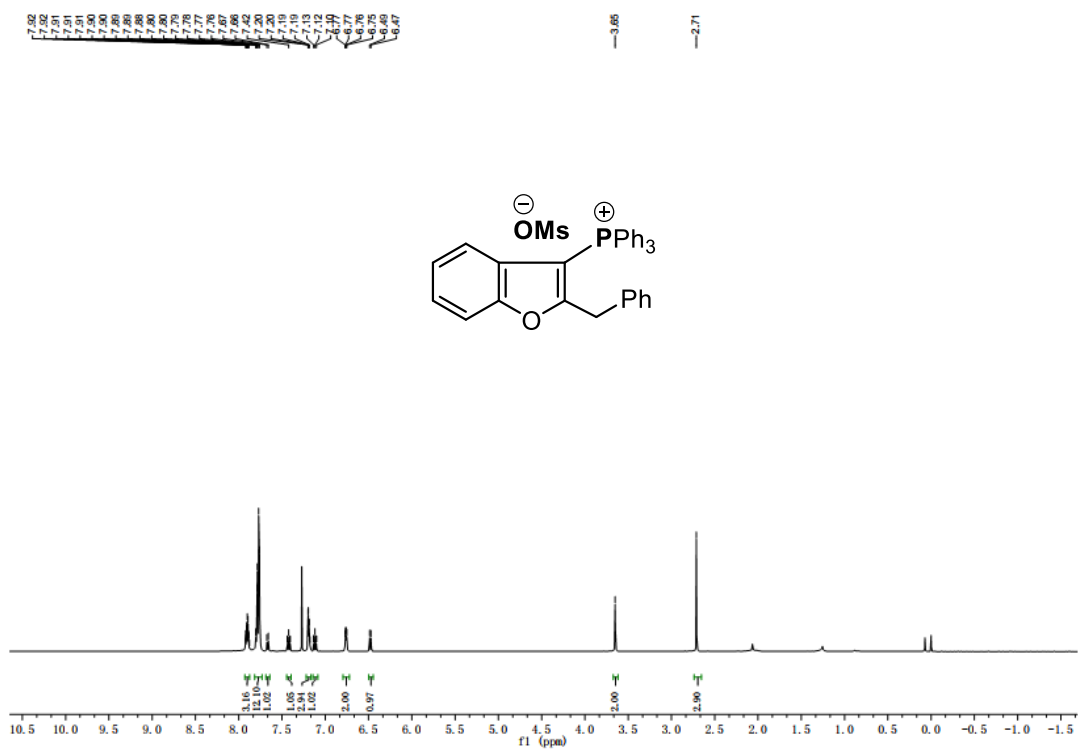



<sup>1</sup>H NMR (500 MHz, CDCl<sub>3</sub>) of compound **6aa**

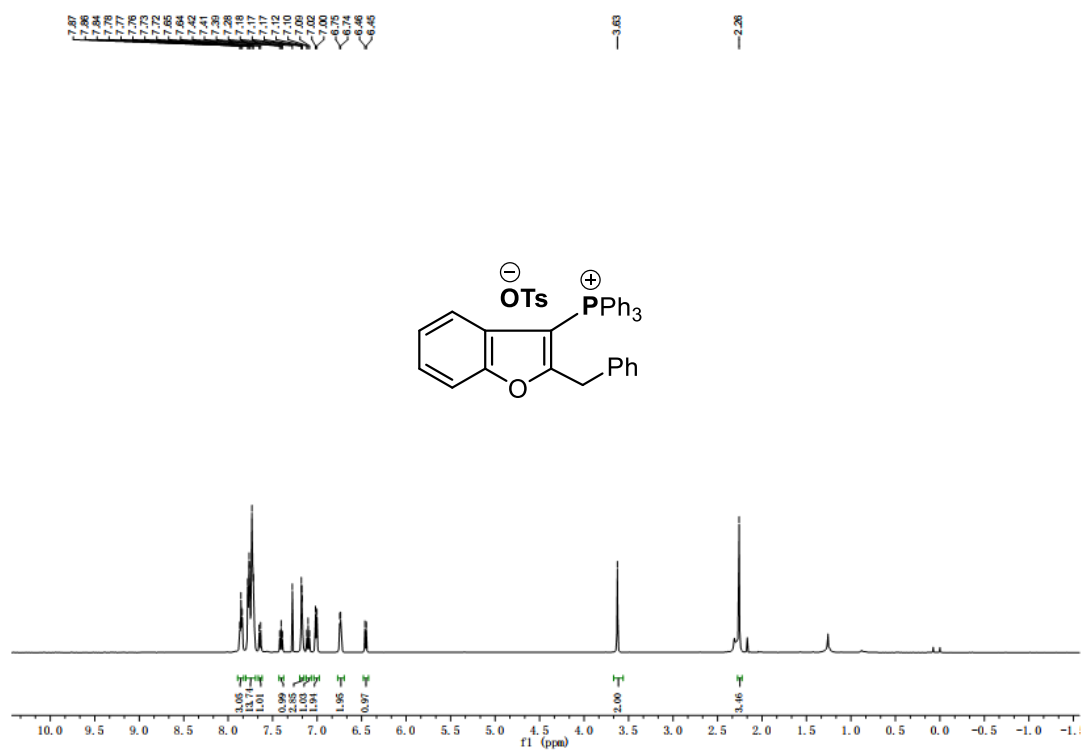

<sup>13</sup>C NMR (126 MHz, CDCl<sub>3</sub>) of compound **6aa**

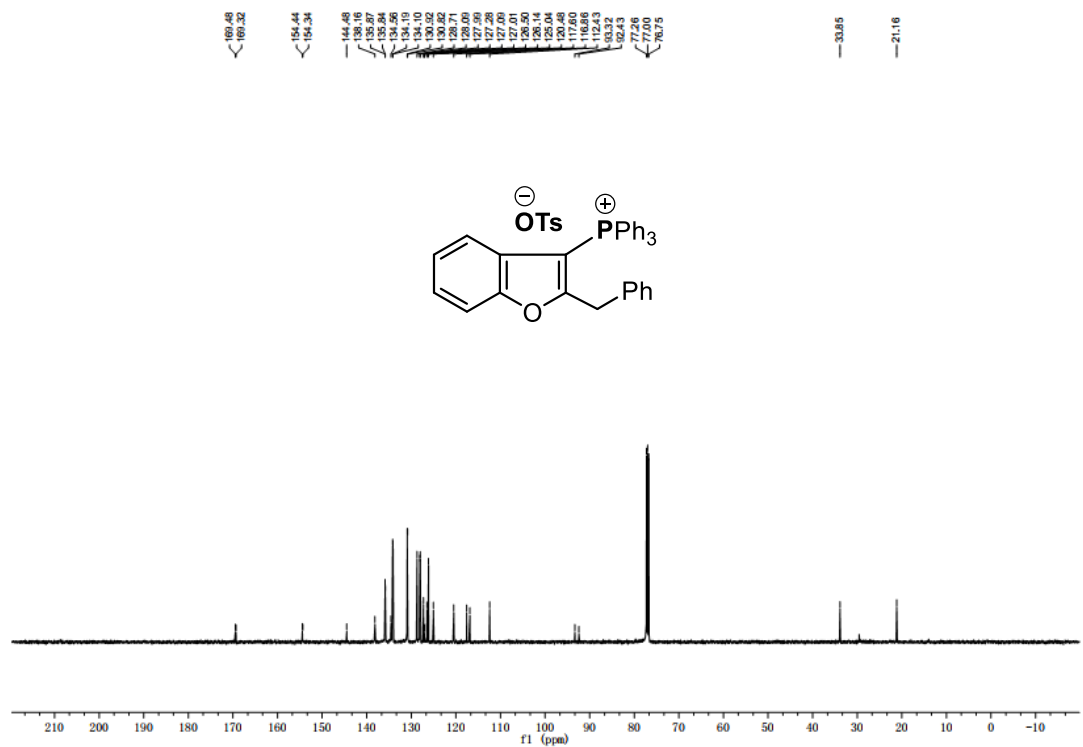



$^{31}\text{P}$  NMR (202 MHz,  $\text{CDCl}_3$ ) of compound **6aa**

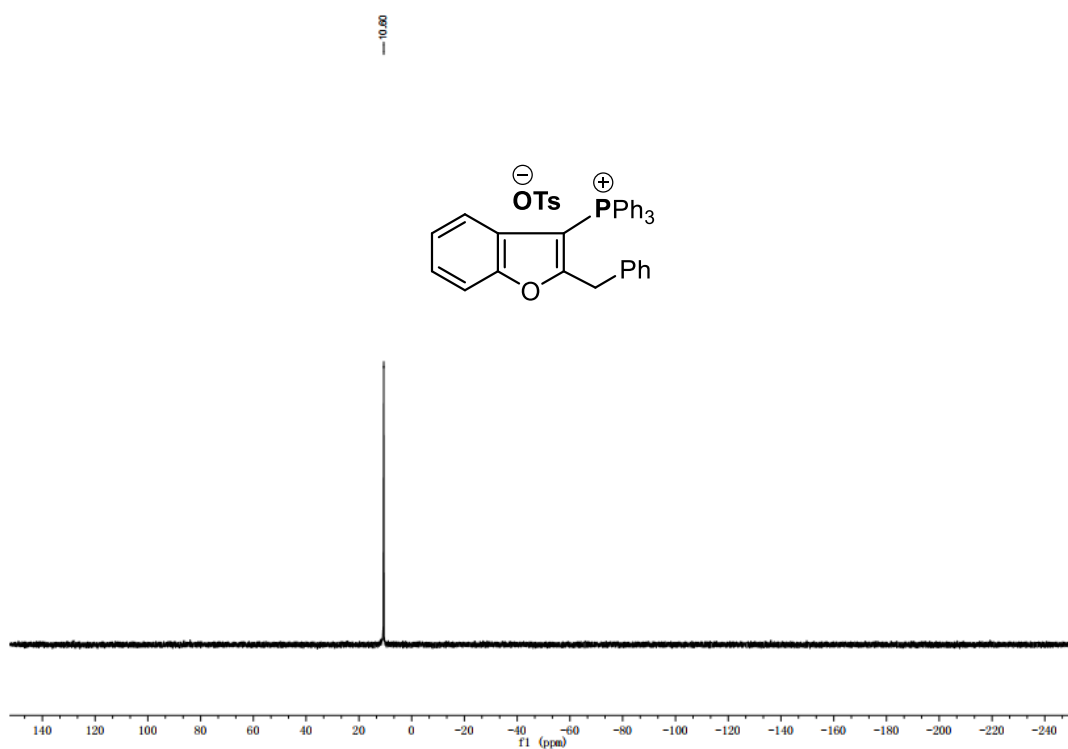

$^1\text{H}$  NMR (500 MHz,  $\text{CDCl}_3$ ) of compound **7aa**

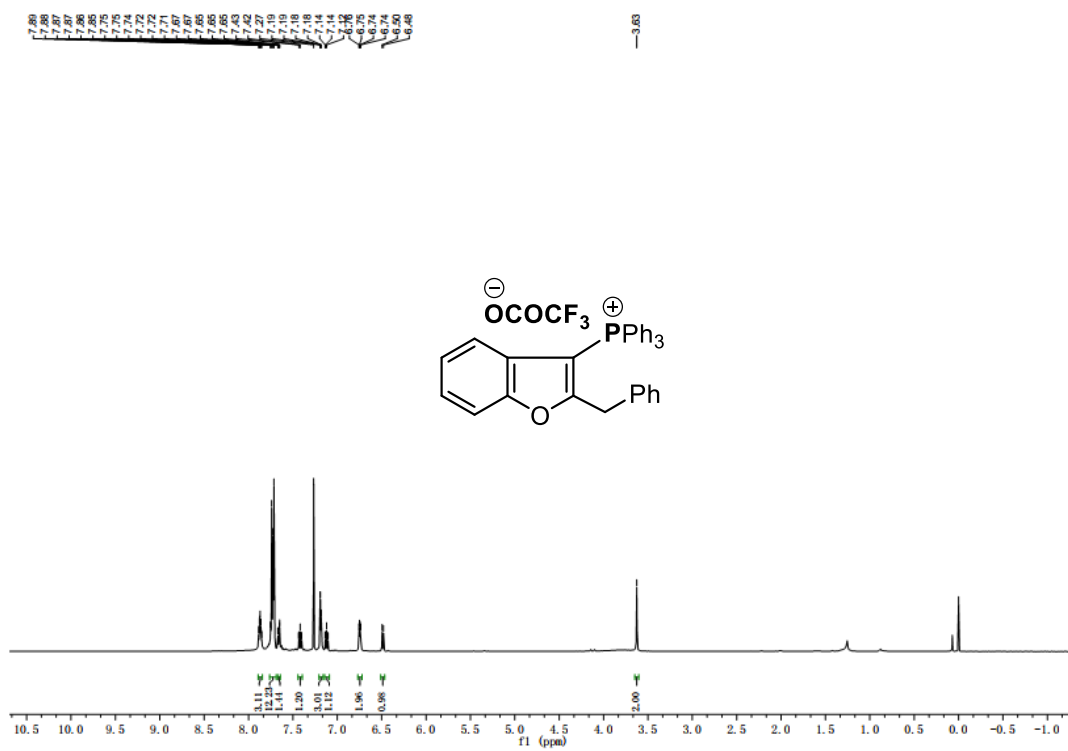

$^{13}\text{C}$  NMR (126 MHz,  $\text{CDCl}_3$ ) of compound **7aa**

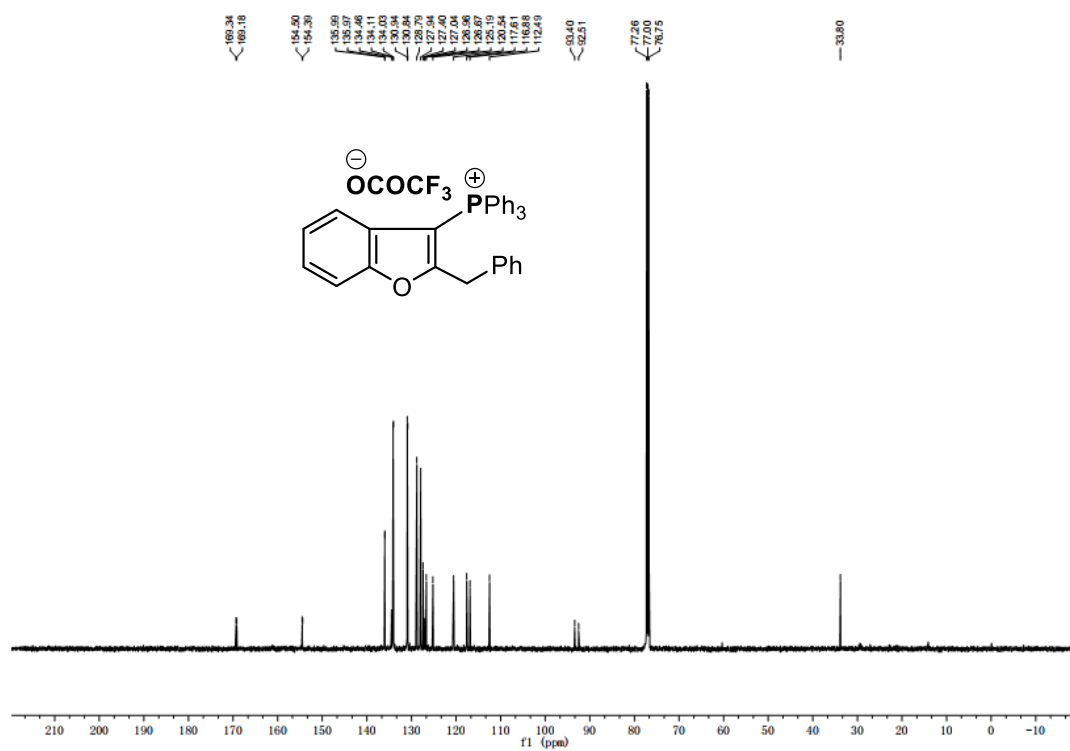

$^{19}\text{F}$  NMR (471 MHz,  $\text{CDCl}_3$ ) of compound **7aa**

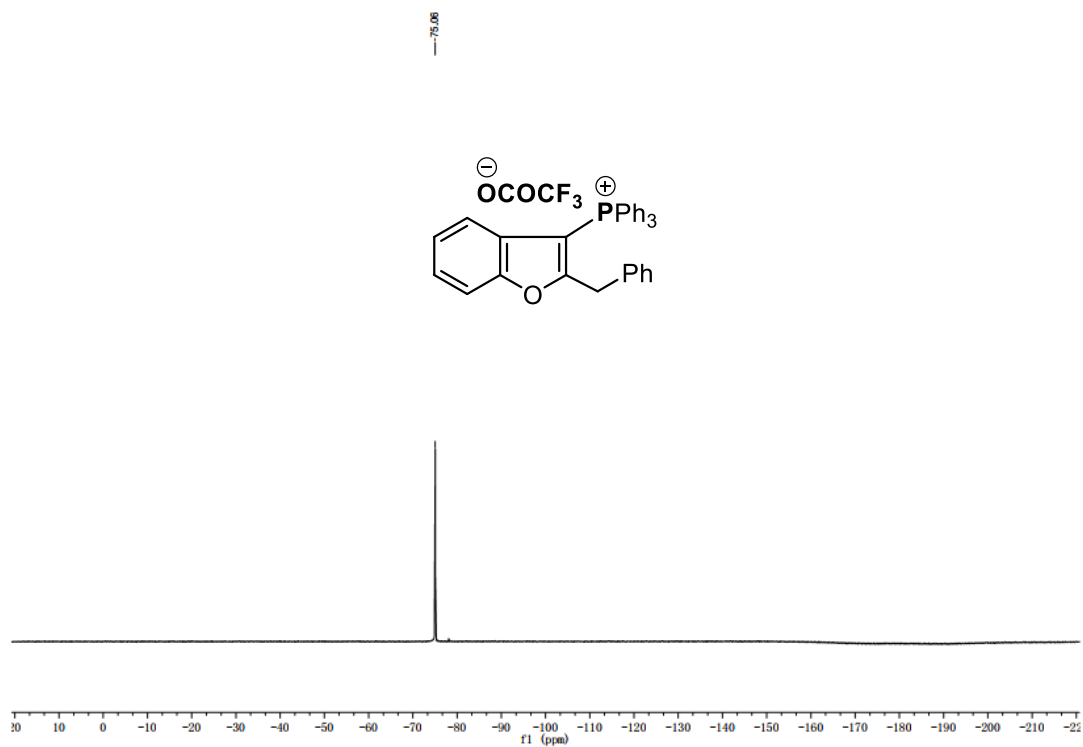

$^{31}\text{P}$  NMR (202 MHz,  $\text{CDCl}_3$ ) of compound **7aa**

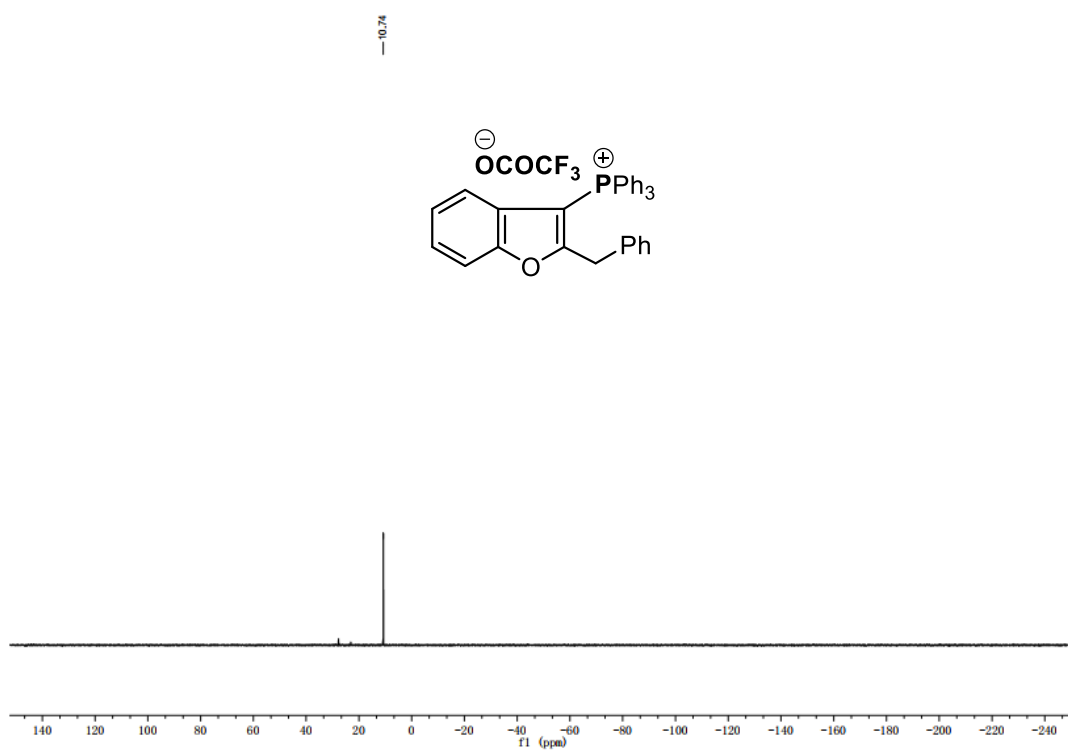

$^1\text{H}$  NMR (500 MHz,  $\text{CDCl}_3$ ) of compound **3ba**

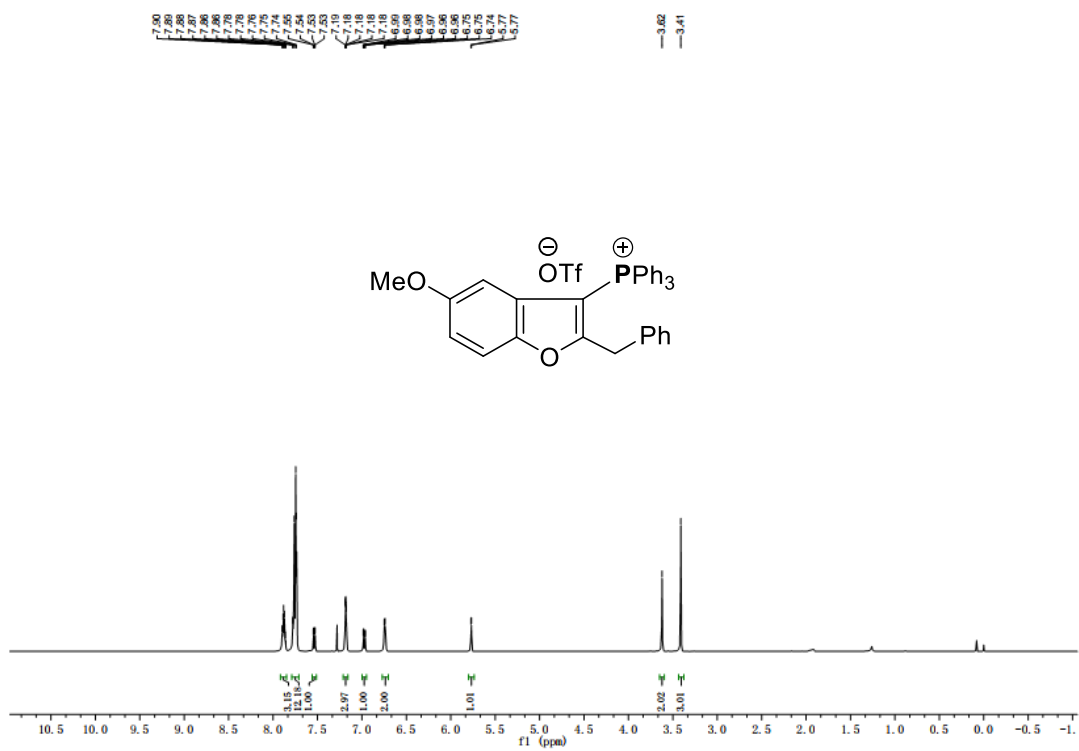

$^{13}\text{C}$  NMR (126 MHz,  $\text{CDCl}_3$ ) of compound **3ba**

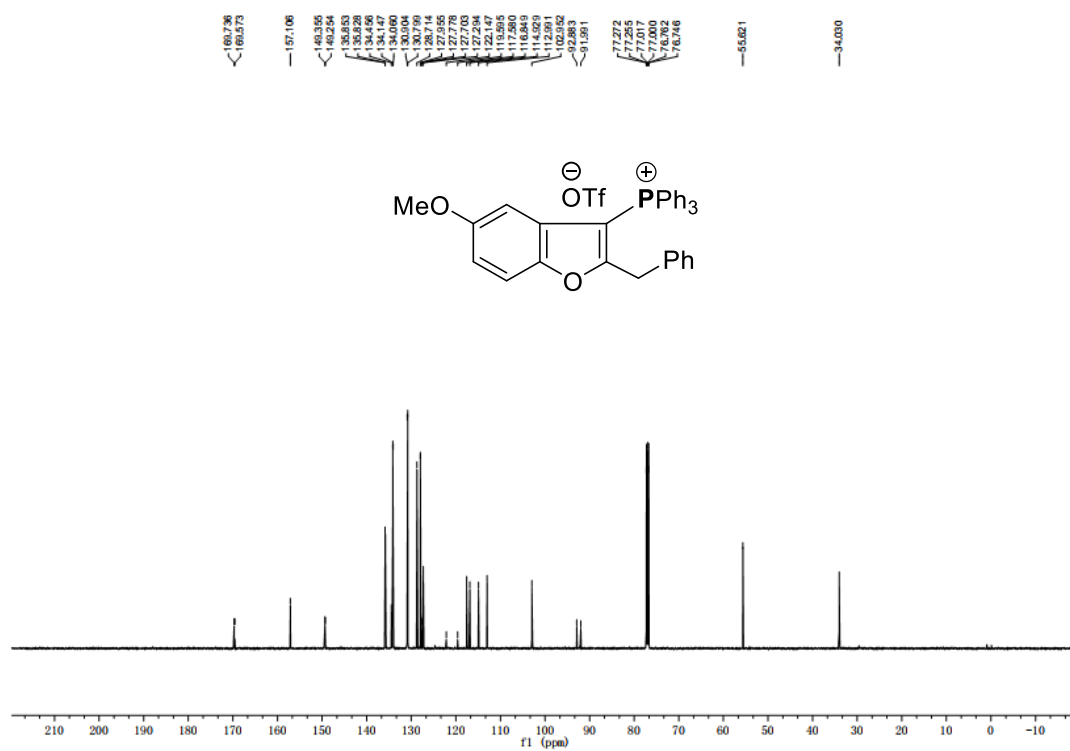

$^{19}\text{F}$  NMR (471 MHz,  $\text{CDCl}_3$ ) of compound **3ba**

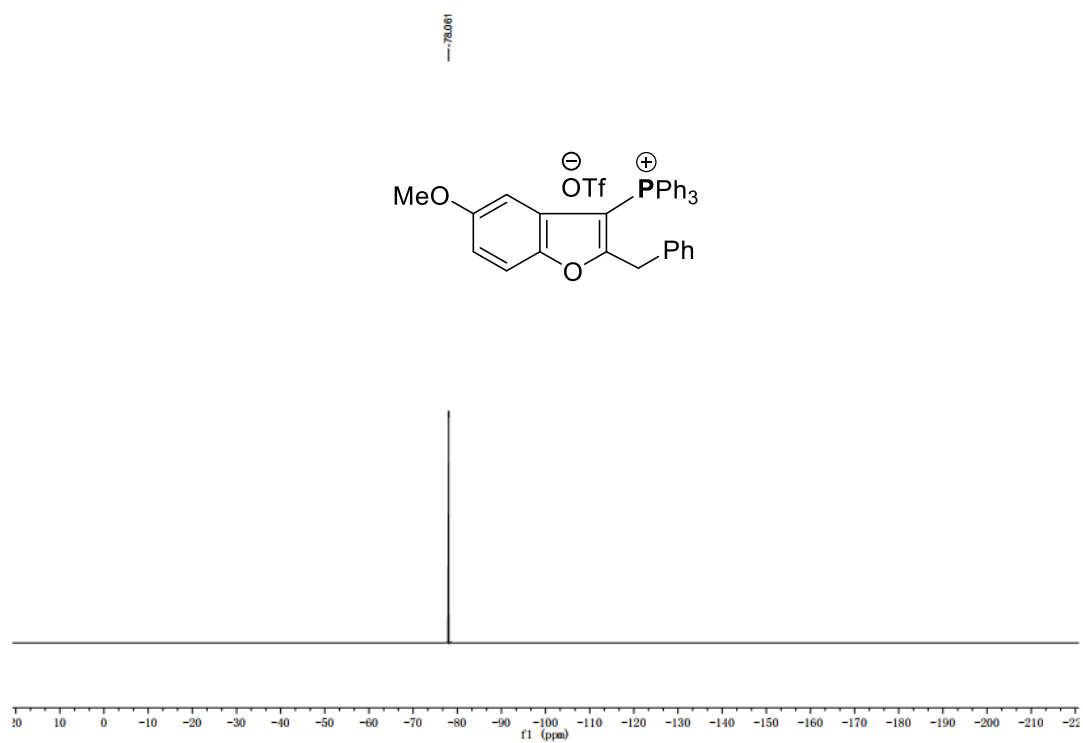

$^{31}\text{P}$  NMR (202 MHz,  $\text{CDCl}_3$ ) of compound **3ba**

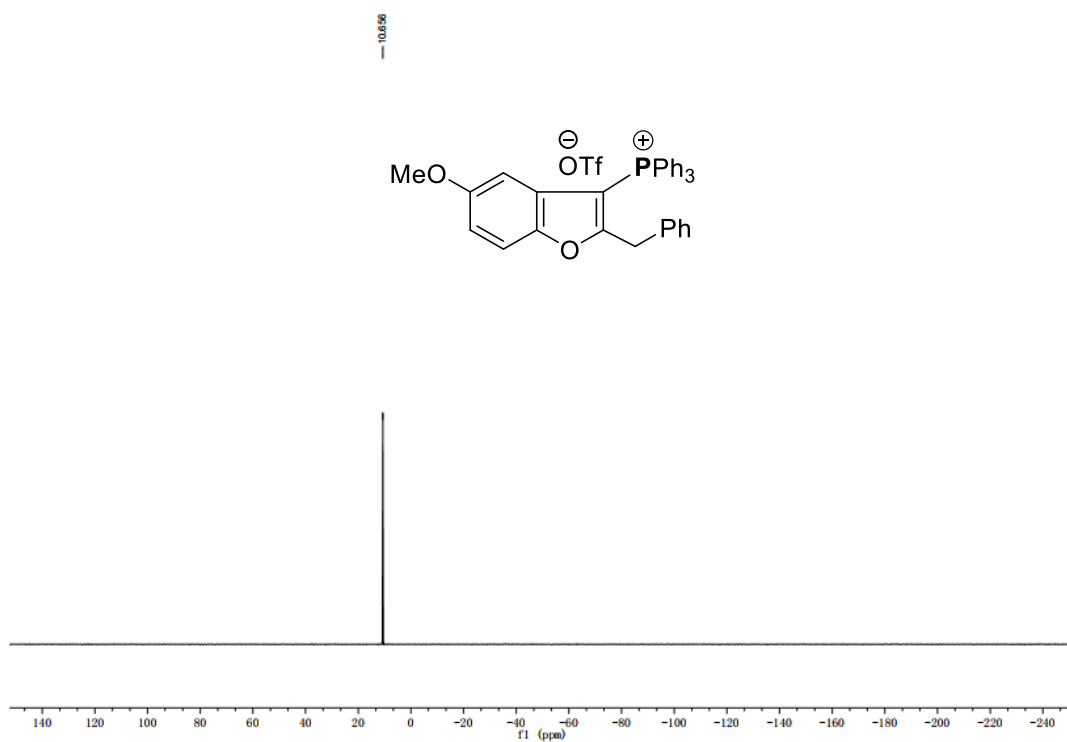

$^1\text{H}$  NMR (500 MHz,  $\text{CDCl}_3$ ) of compound **3ca**

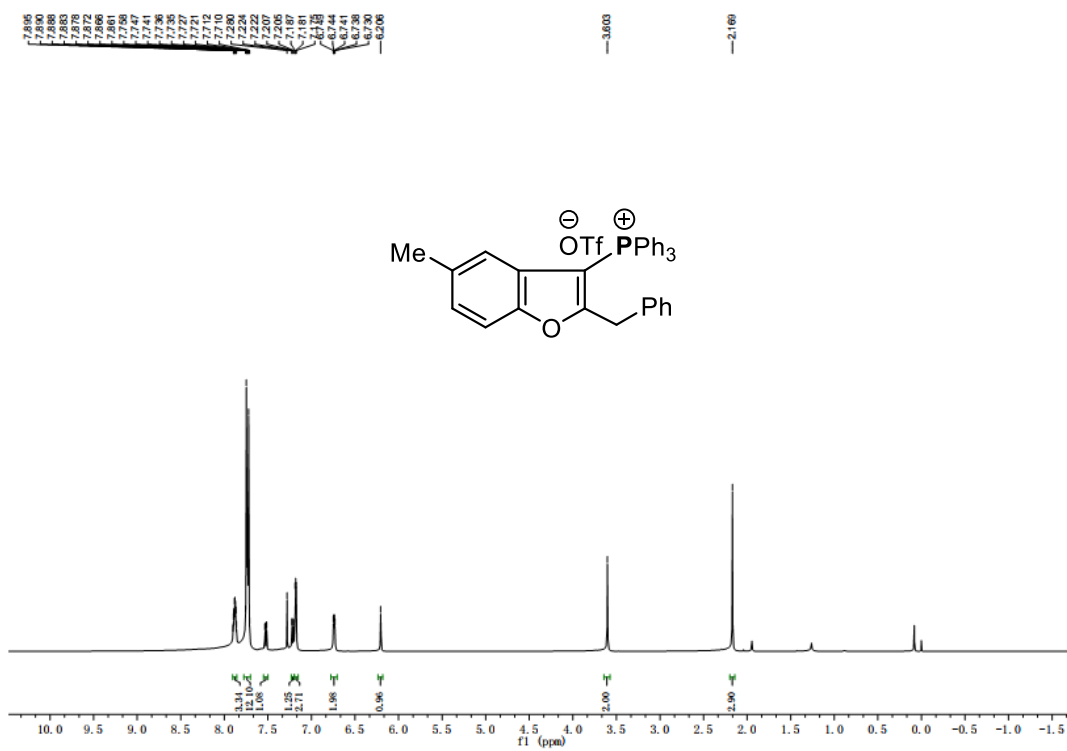

$^{13}\text{C}$  NMR (126 MHz,  $\text{CDCl}_3$ ) of compound **3ca**

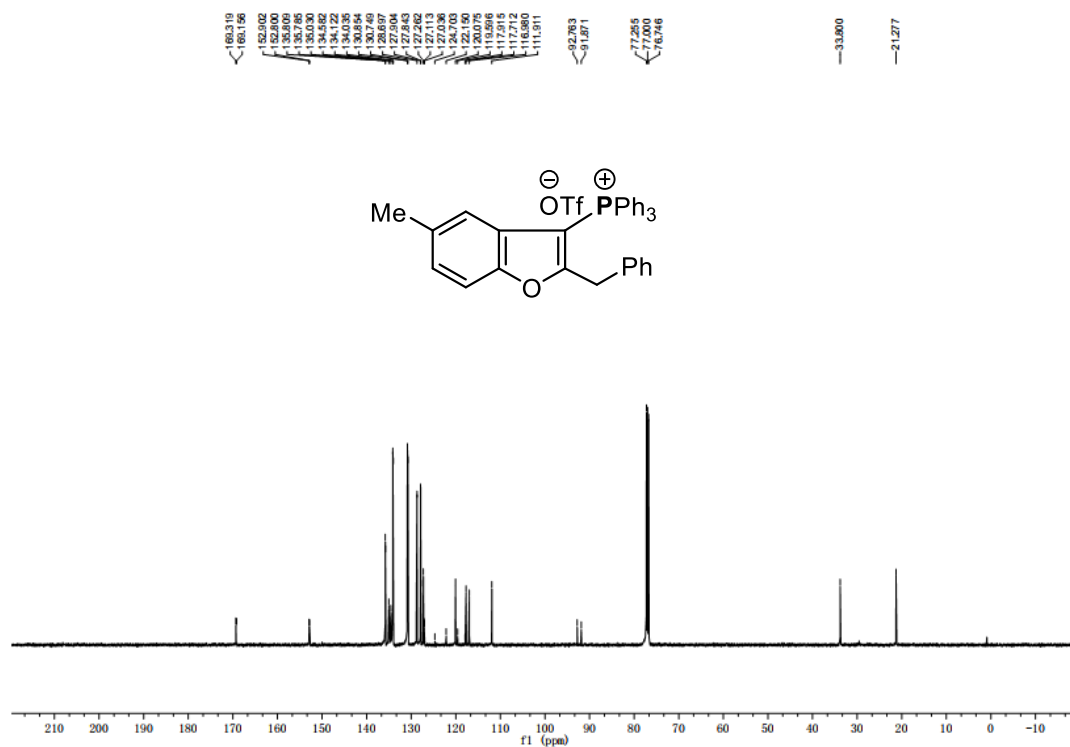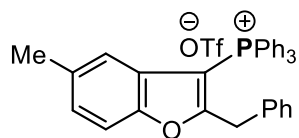

$^{19}\text{F}$  NMR (471 MHz,  $\text{CDCl}_3$ ) of compound **3ca**

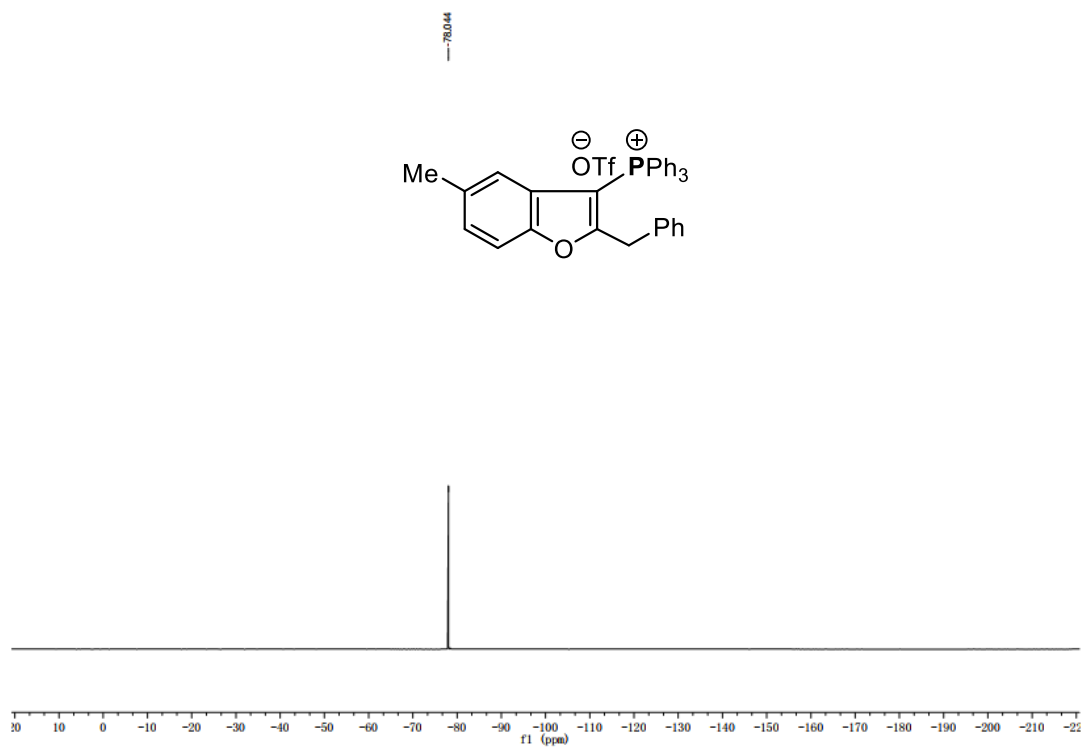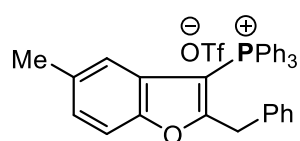

$^{31}\text{P}$  NMR (202 MHz,  $\text{CDCl}_3$ ) of compound **3ca**

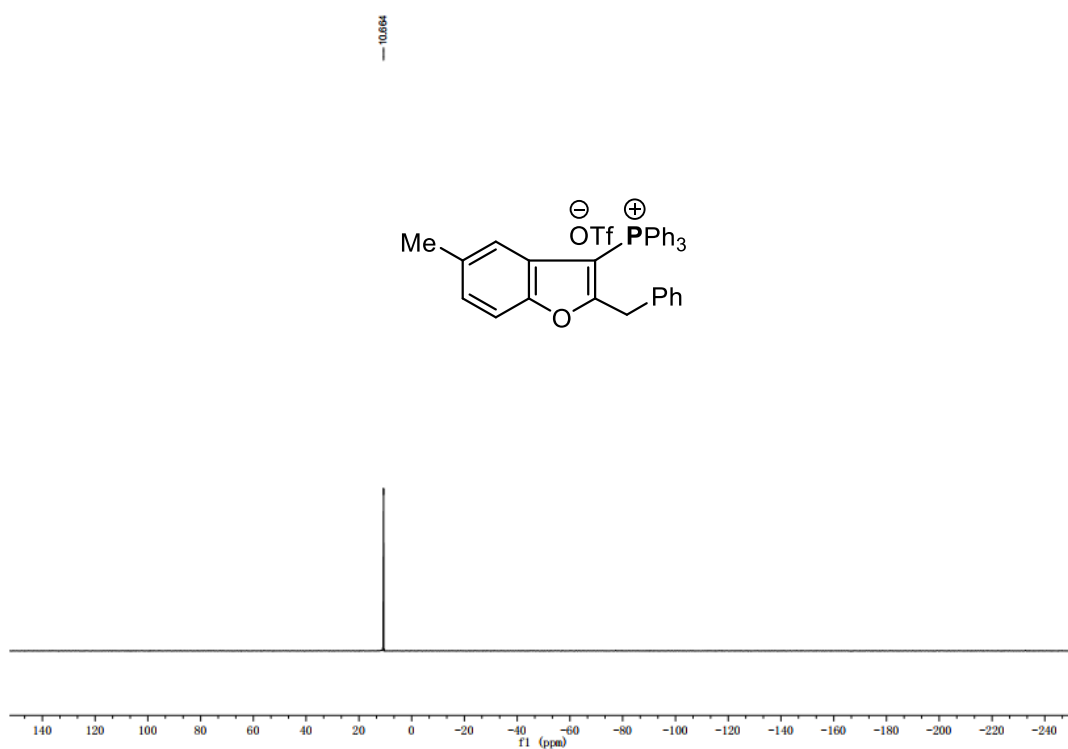

$^1\text{H}$  NMR (500 MHz,  $\text{CDCl}_3$ ) of compound **3da**

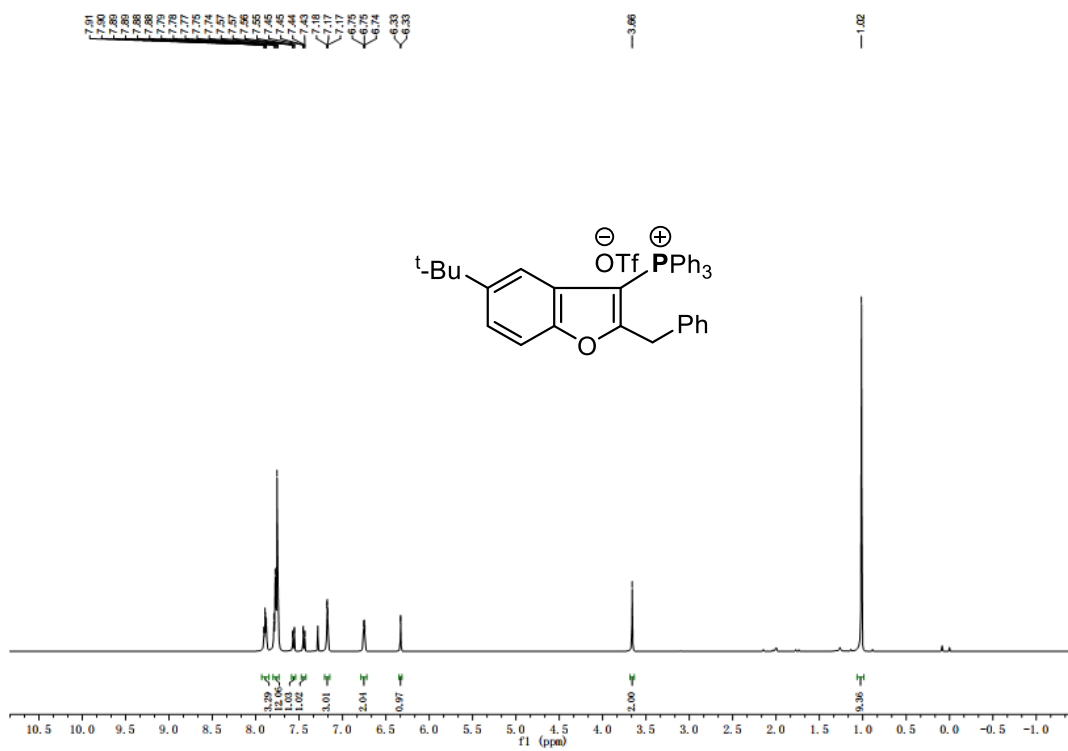

$^{13}\text{C}$  NMR (126 MHz,  $\text{CDCl}_3$ ) of compound **3da**

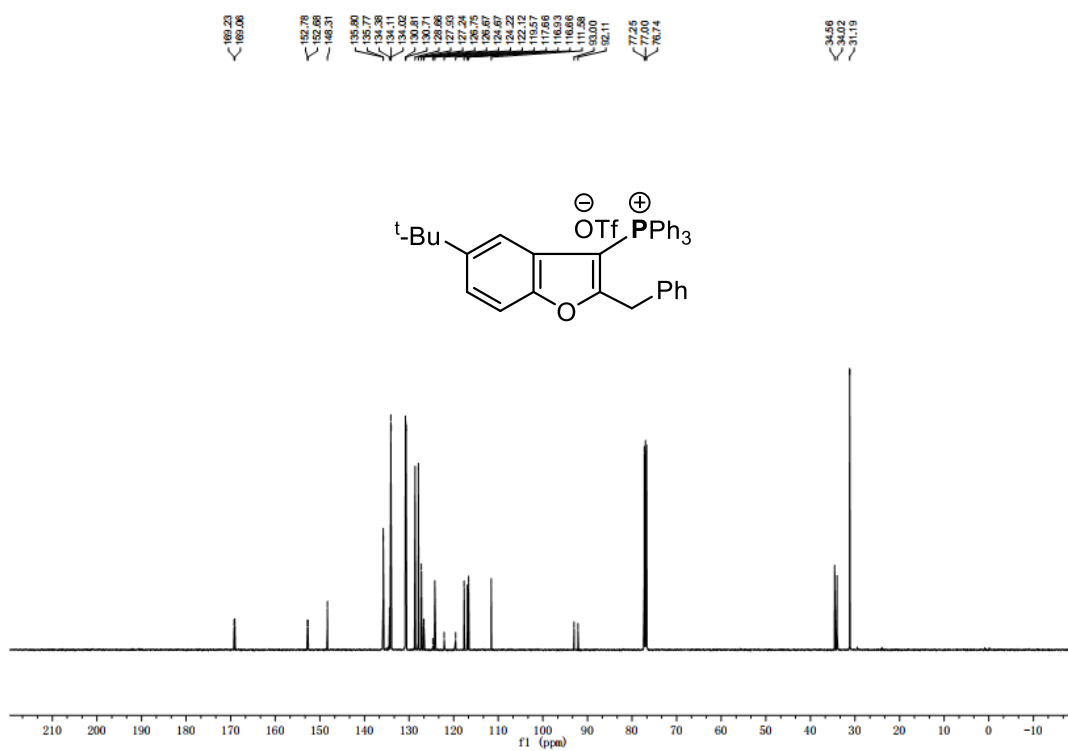

$^{19}\text{F}$  NMR (471 MHz,  $\text{CDCl}_3$ ) of compound **3da**

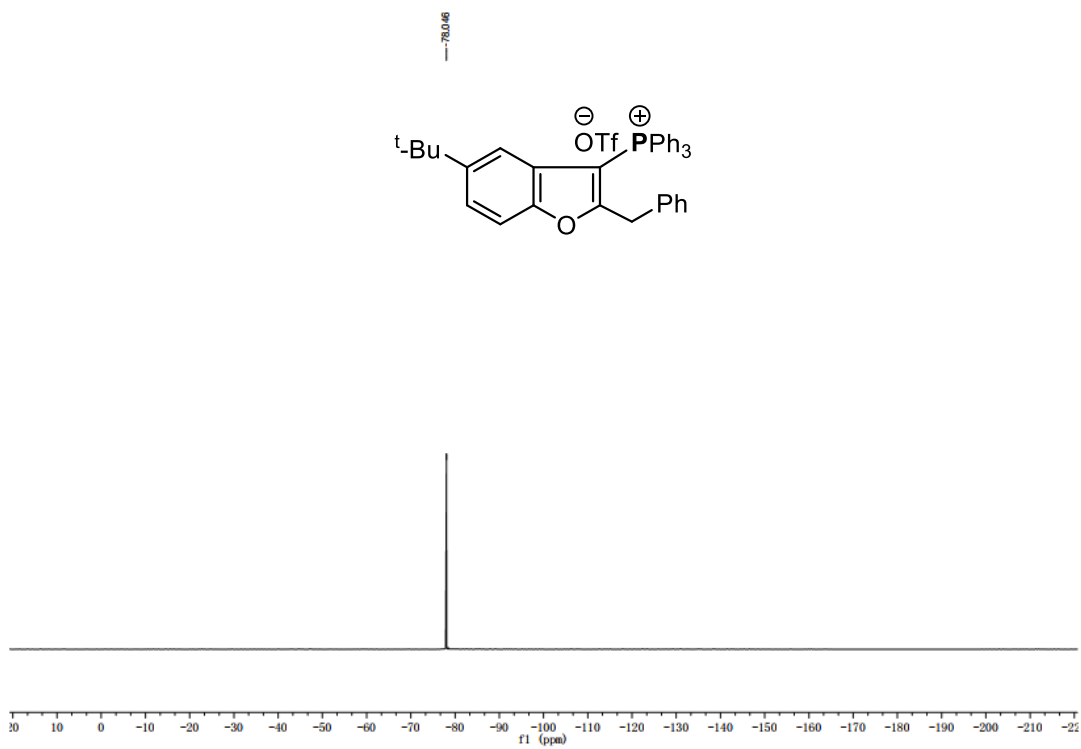



$^{31}\text{P}$  NMR (202 MHz,  $\text{CDCl}_3$ ) of compound **3da**

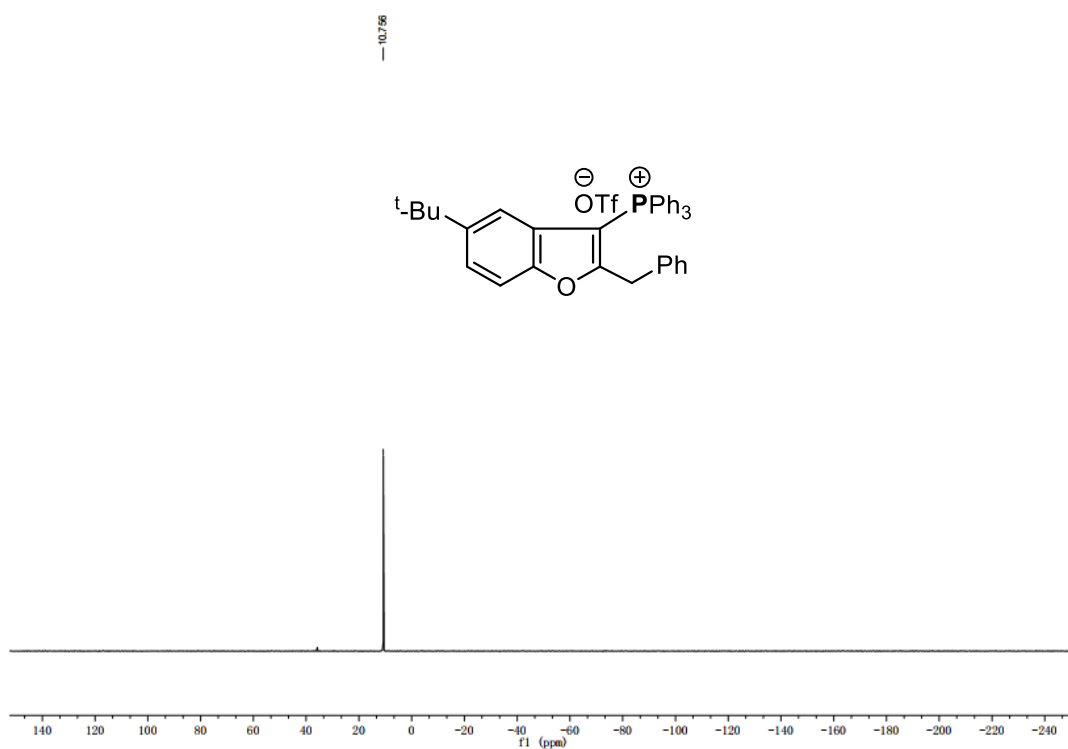

$^1\text{H}$  NMR (500 MHz,  $\text{CDCl}_3$ ) of compound **3ea**

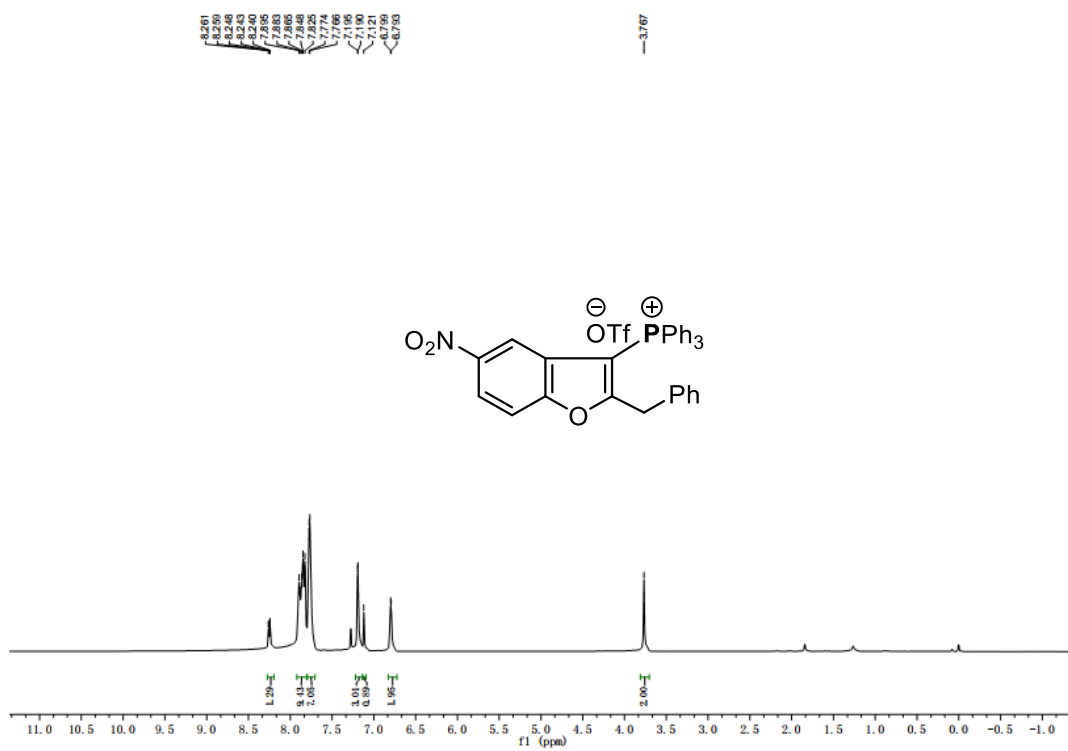

$^{13}\text{C}$  NMR (126 MHz,  $\text{CDCl}_3$ ) of compound **3ea**

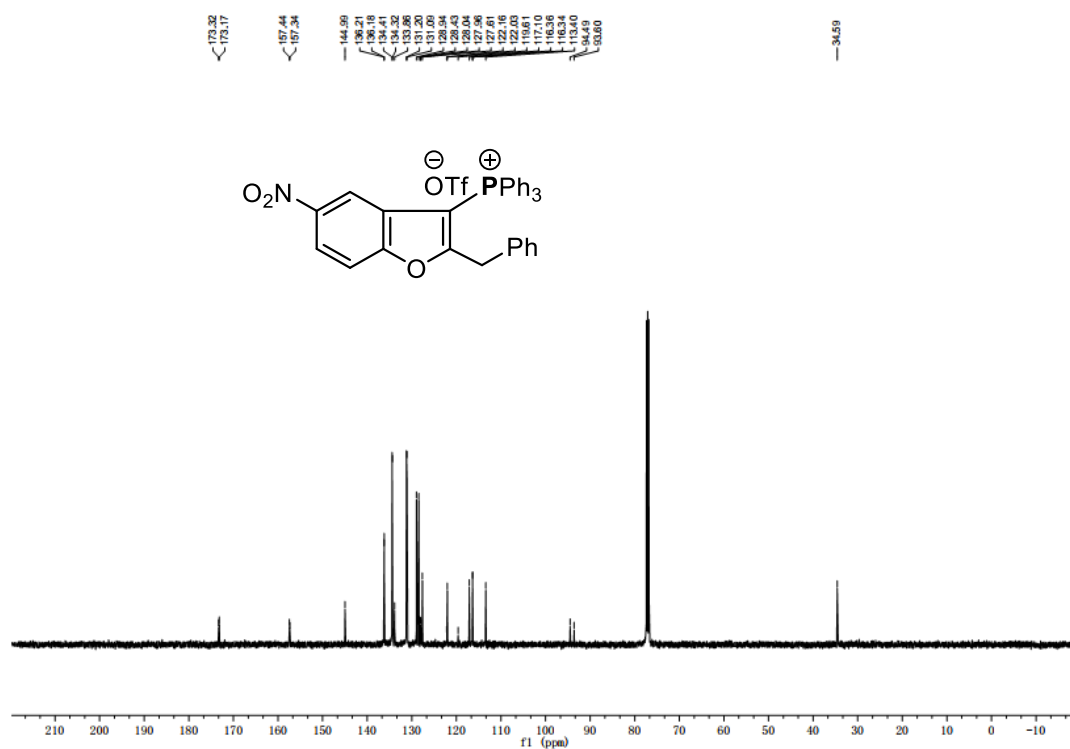

$^{19}\text{F}$  NMR (471 MHz,  $\text{CDCl}_3$ ) of compound **3ea**

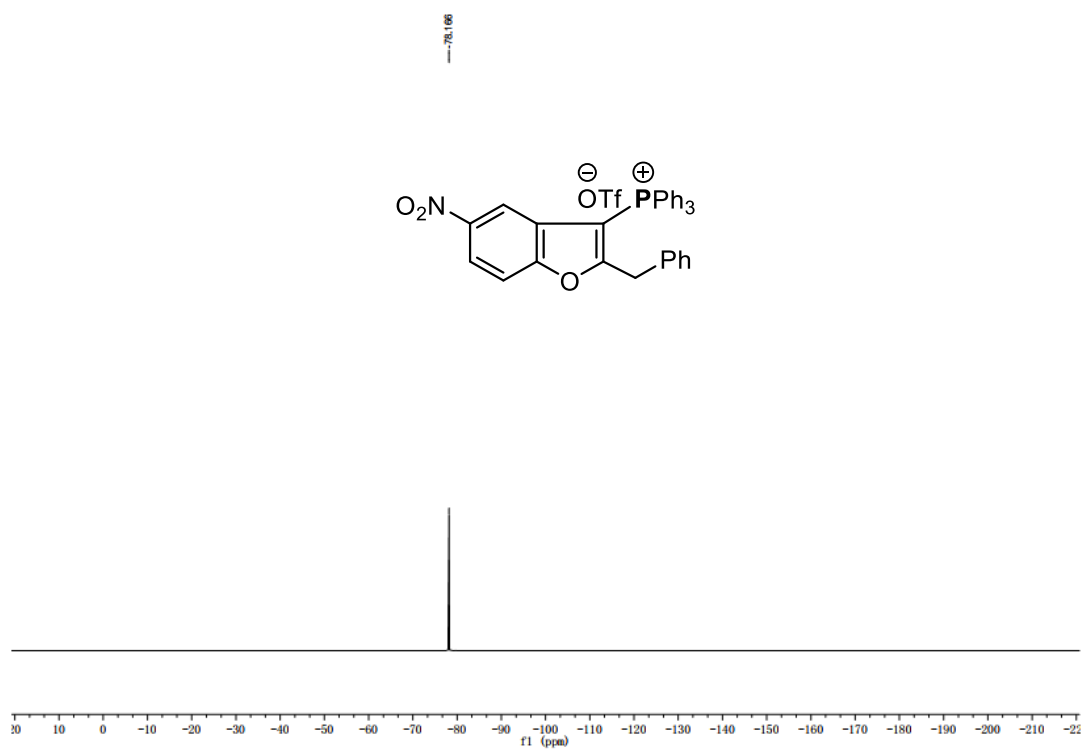







$^{13}\text{C}$  NMR (126 MHz,  $\text{CDCl}_3$ ) of compound **3ga**

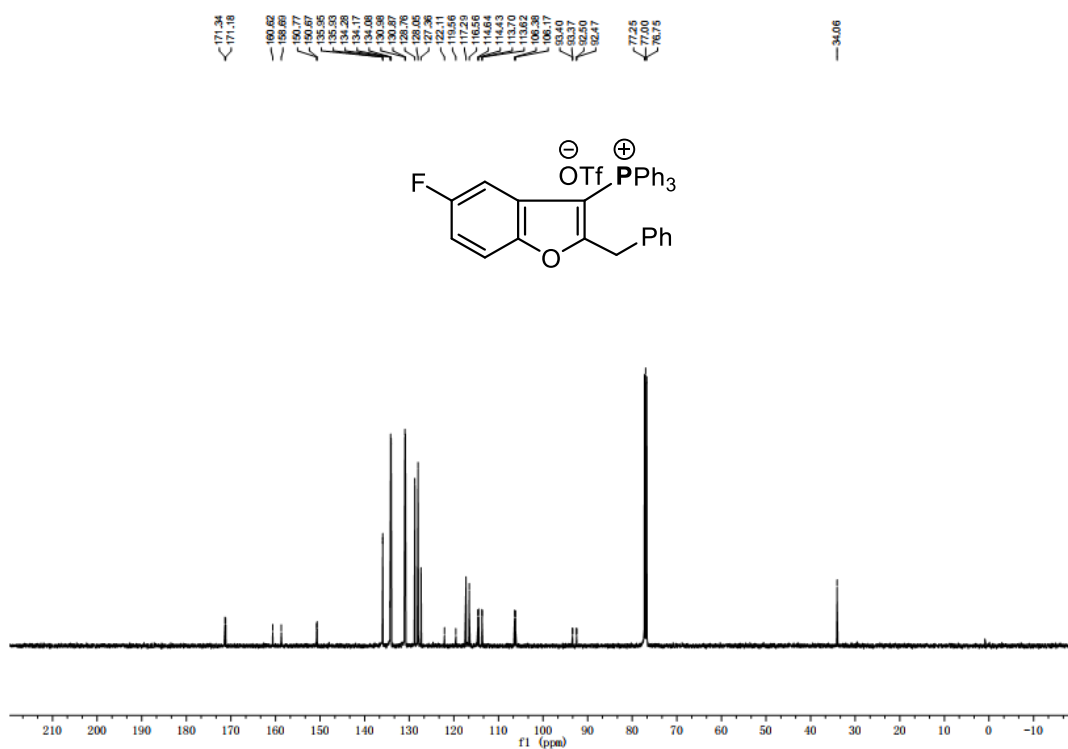

$^{19}\text{F}$  NMR (471 MHz,  $\text{CDCl}_3$ ) of compound **3ga**

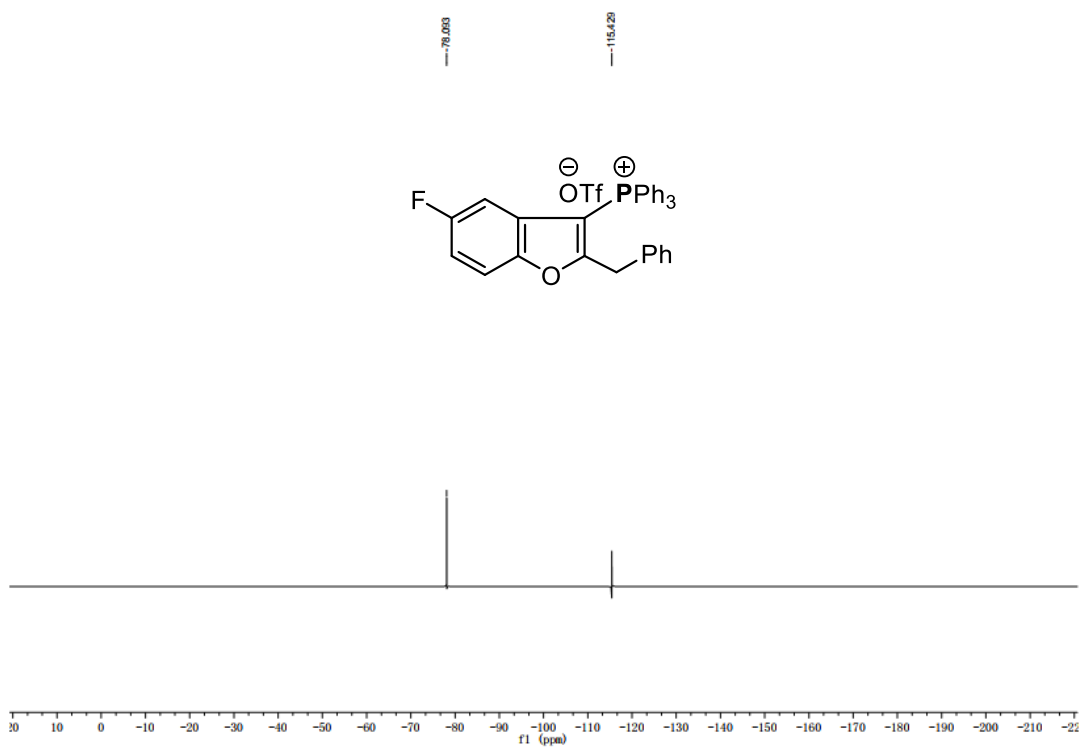

$^{31}\text{P}$  NMR (202 MHz,  $\text{CDCl}_3$ ) of compound **3ga**

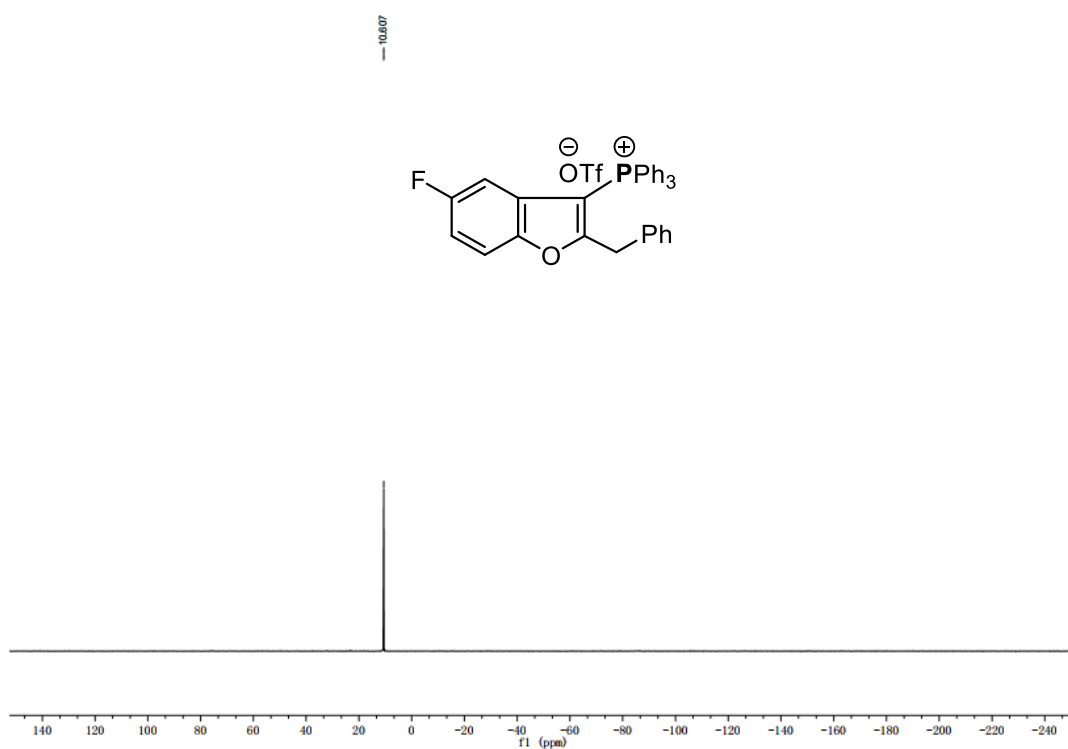

$^1\text{H}$  NMR (500 MHz,  $\text{CDCl}_3$ ) of compound **3ha**

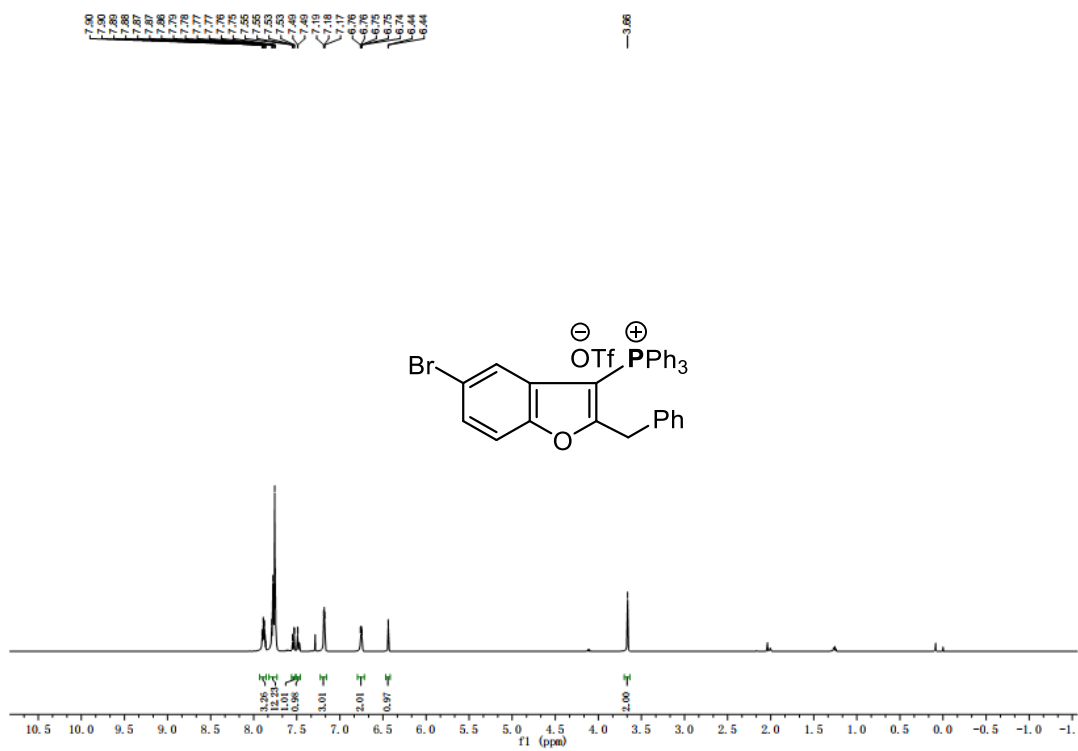

$^{13}\text{C}$  NMR (126 MHz,  $\text{CDCl}_3$ ) of compound **3ha**

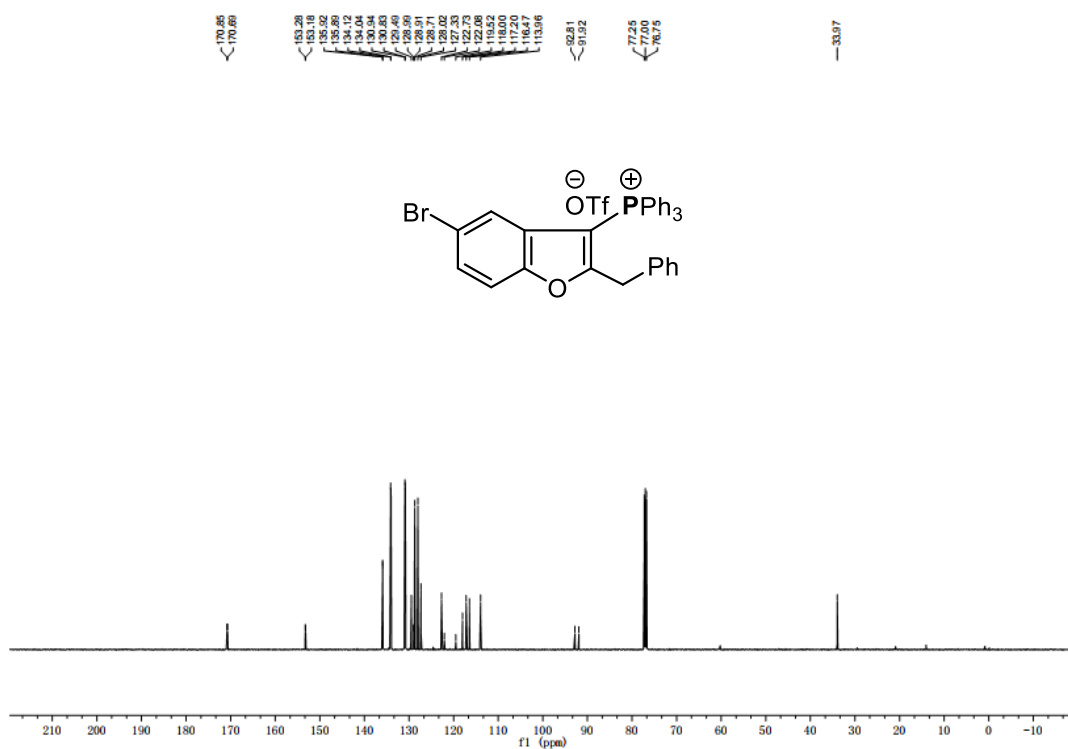

$^{19}\text{F}$  NMR (471 MHz,  $\text{CDCl}_3$ ) of compound **3ha**

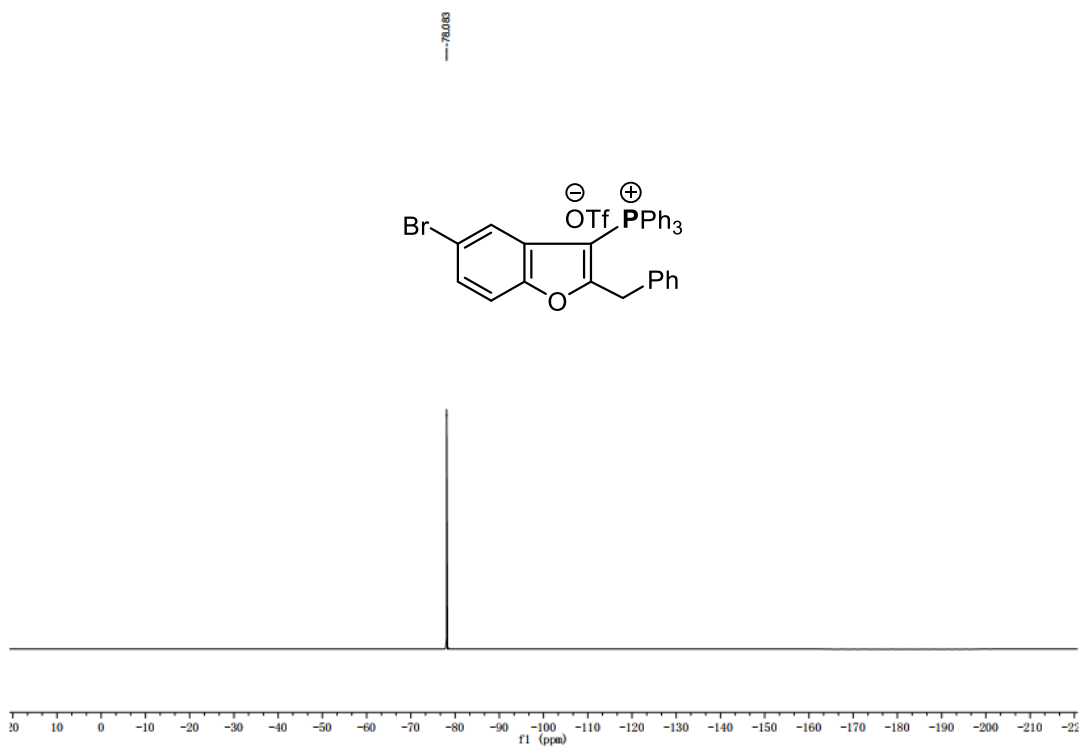



$^{31}\text{P}$  NMR (202 MHz,  $\text{CDCl}_3$ ) of compound **3ha**

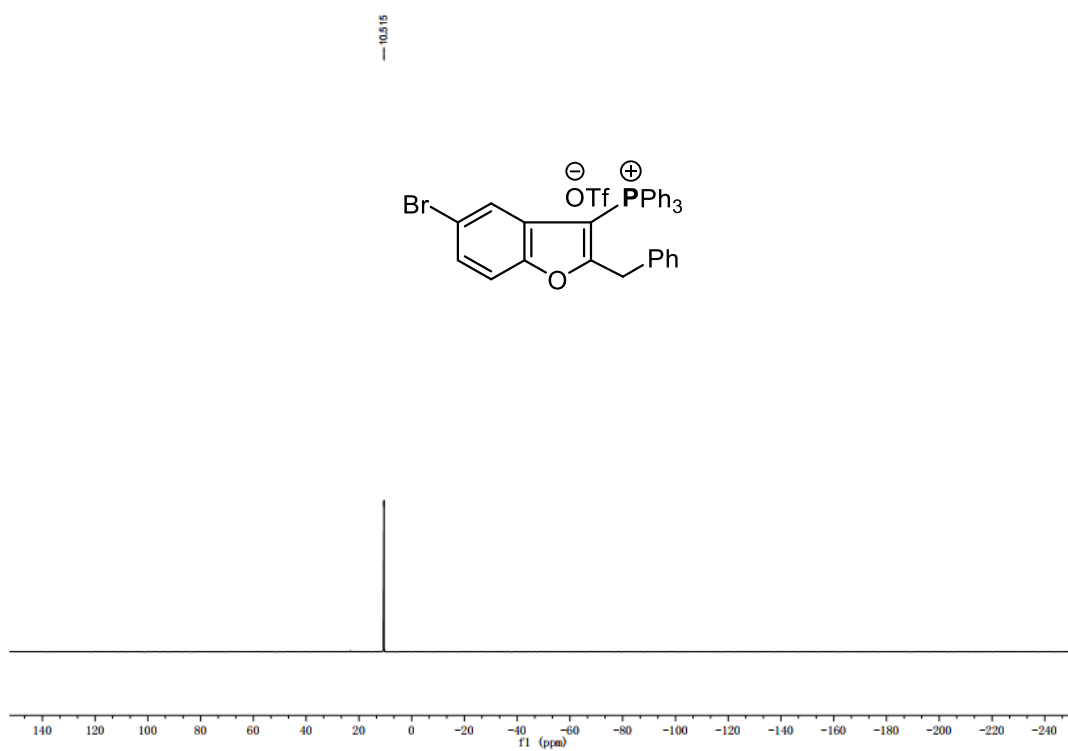

$^1\text{H}$  NMR (500 MHz,  $\text{CDCl}_3$ ) of compound **3ia**

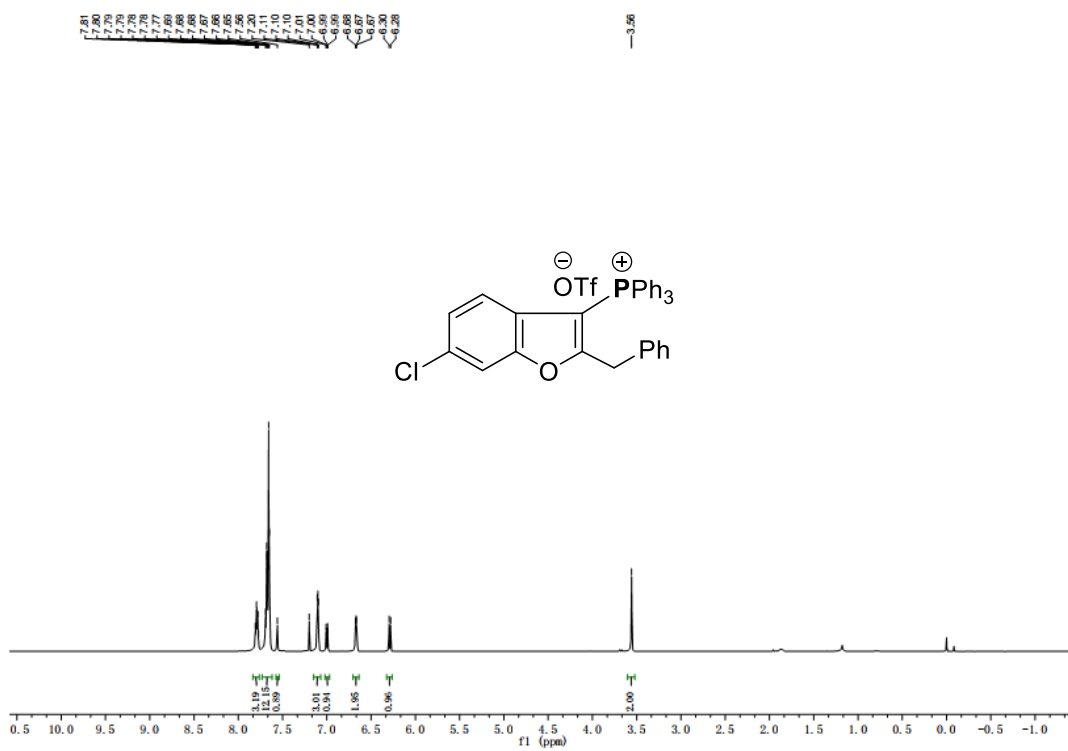

$^{13}\text{C}$  NMR (126 MHz,  $\text{CDCl}_3$ ) of compound **3ia**

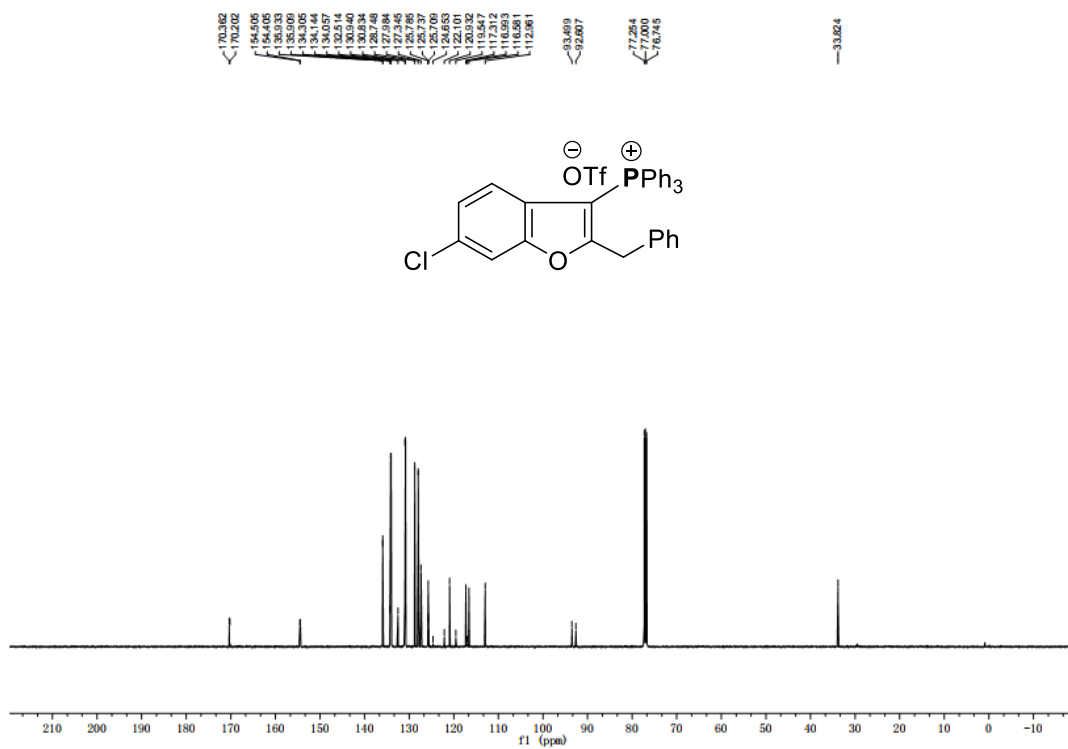

$^{19}\text{F}$  NMR (471 MHz,  $\text{CDCl}_3$ ) of compound **3ia**

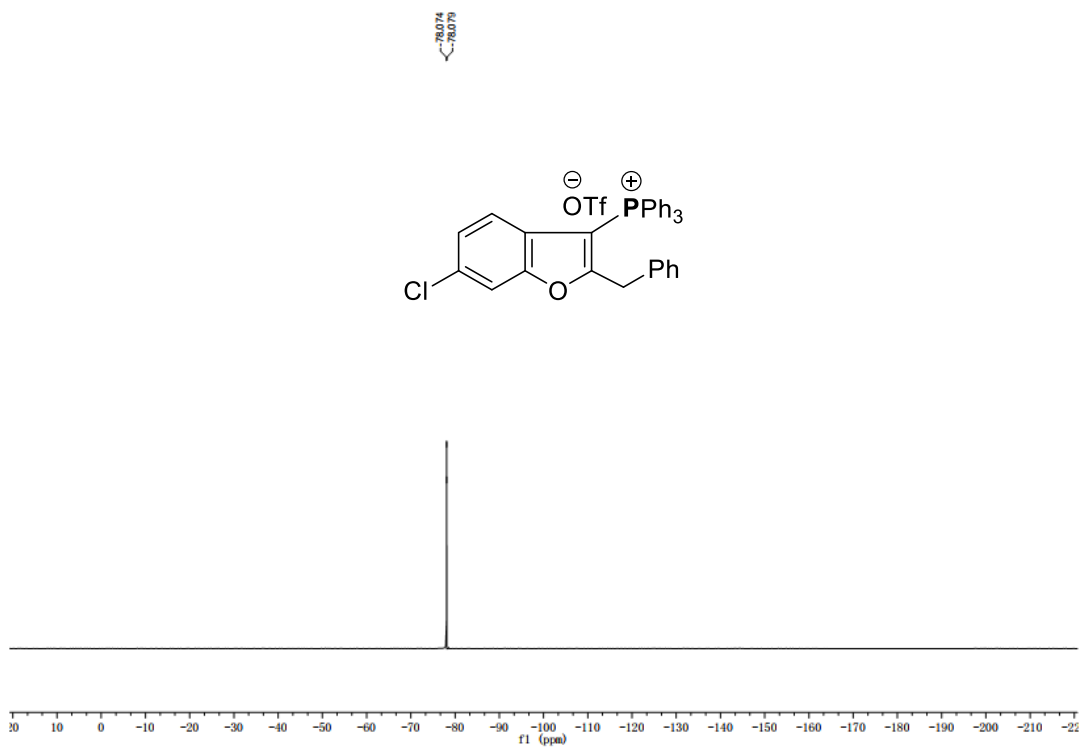

$^{31}\text{P}$  NMR (202 MHz,  $\text{CDCl}_3$ ) of compound **3ia**

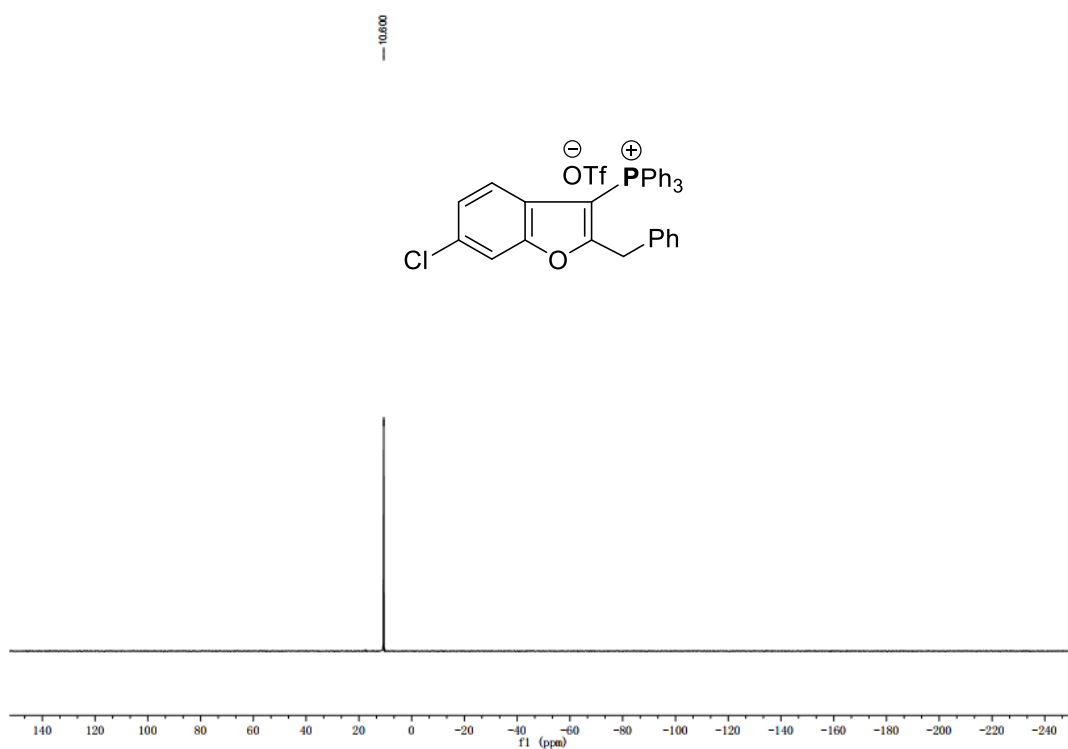

$^1\text{H}$  NMR (500 MHz,  $\text{CDCl}_3$ ) of compound **3ja**

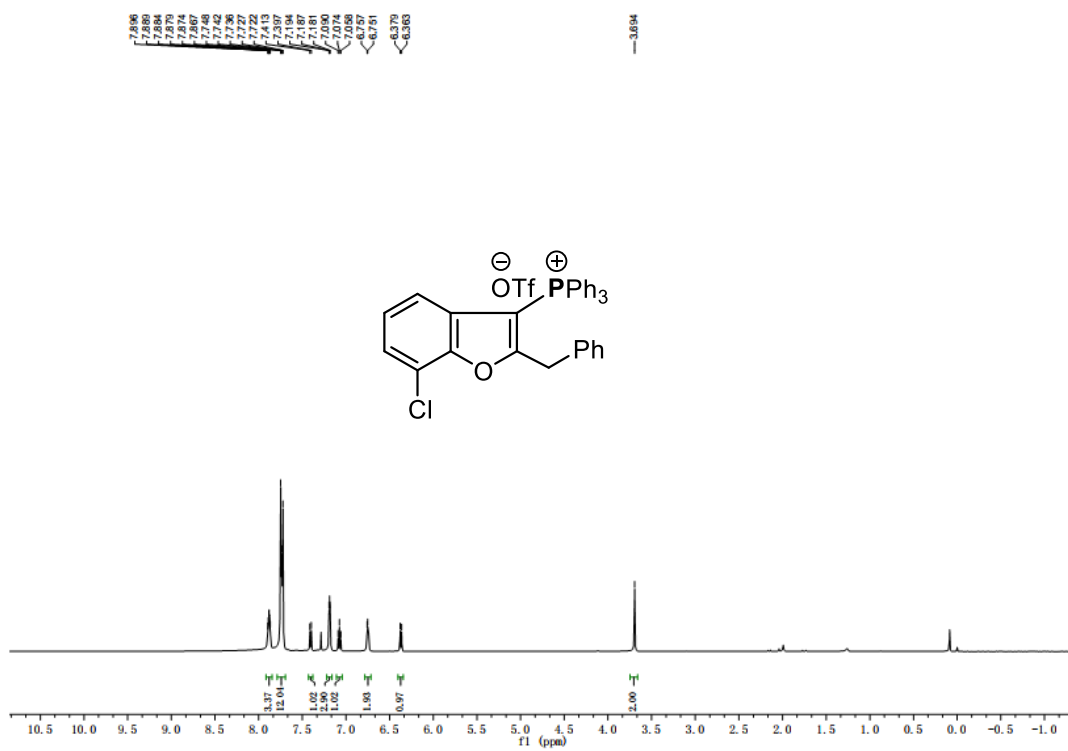



$^{31}\text{P}$  NMR (202 MHz,  $\text{CDCl}_3$ ) of compound **3ja**

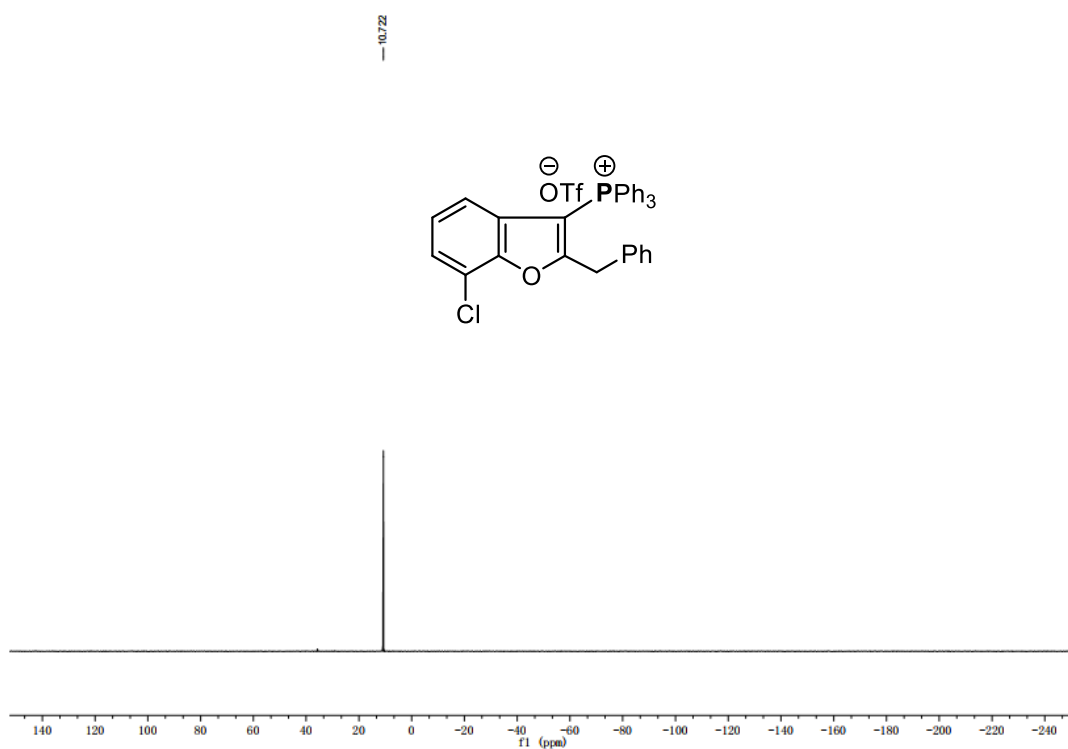

$^1\text{H}$  NMR (500 MHz,  $\text{CDCl}_3$ ) of compound **3ka**

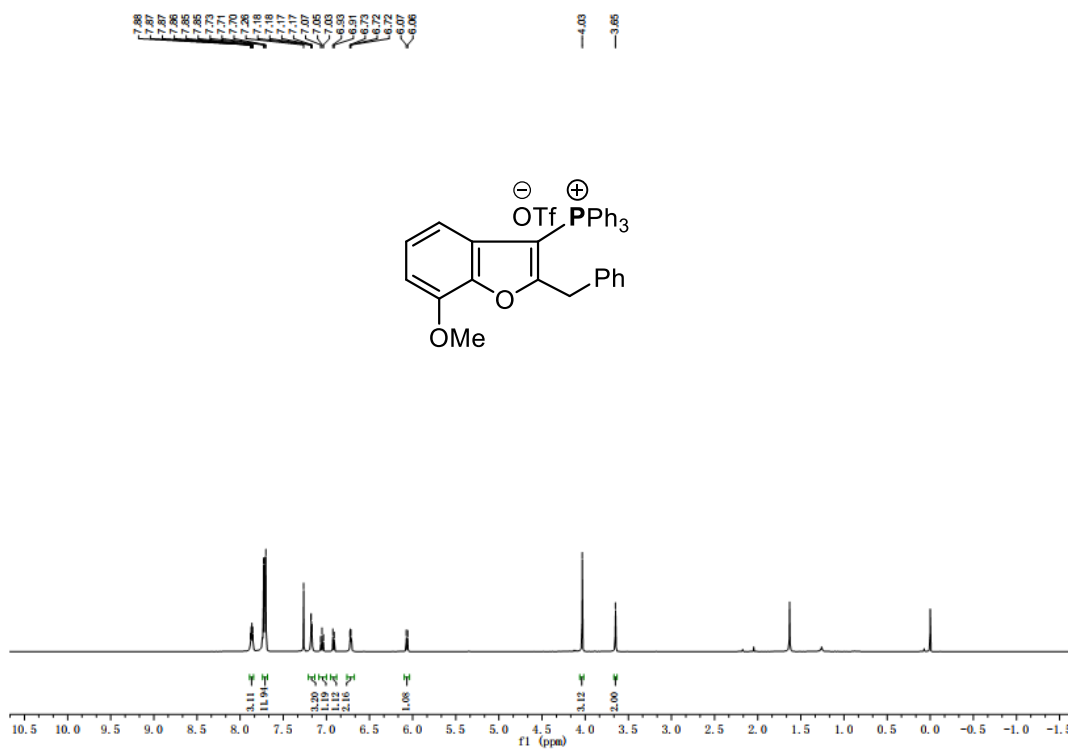

$^{13}\text{C}$  NMR (126 MHz,  $\text{CDCl}_3$ ) of compound **3ka**

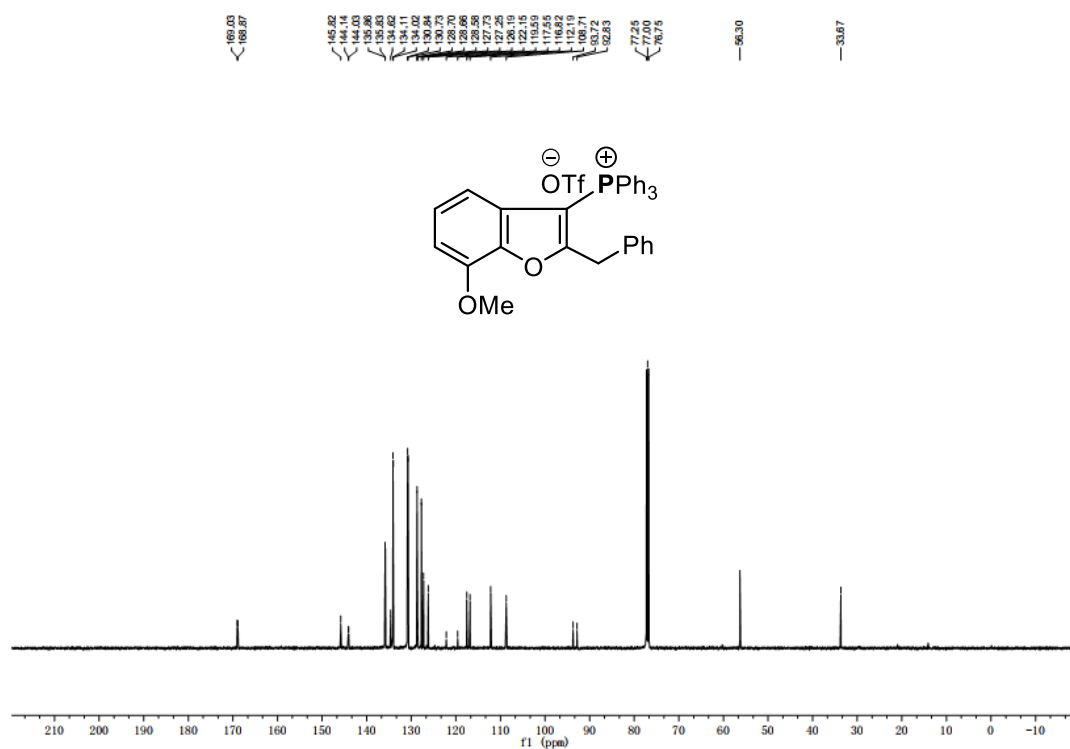

$^{19}\text{F}$  NMR (471 MHz,  $\text{CDCl}_3$ ) of compound **3ka**

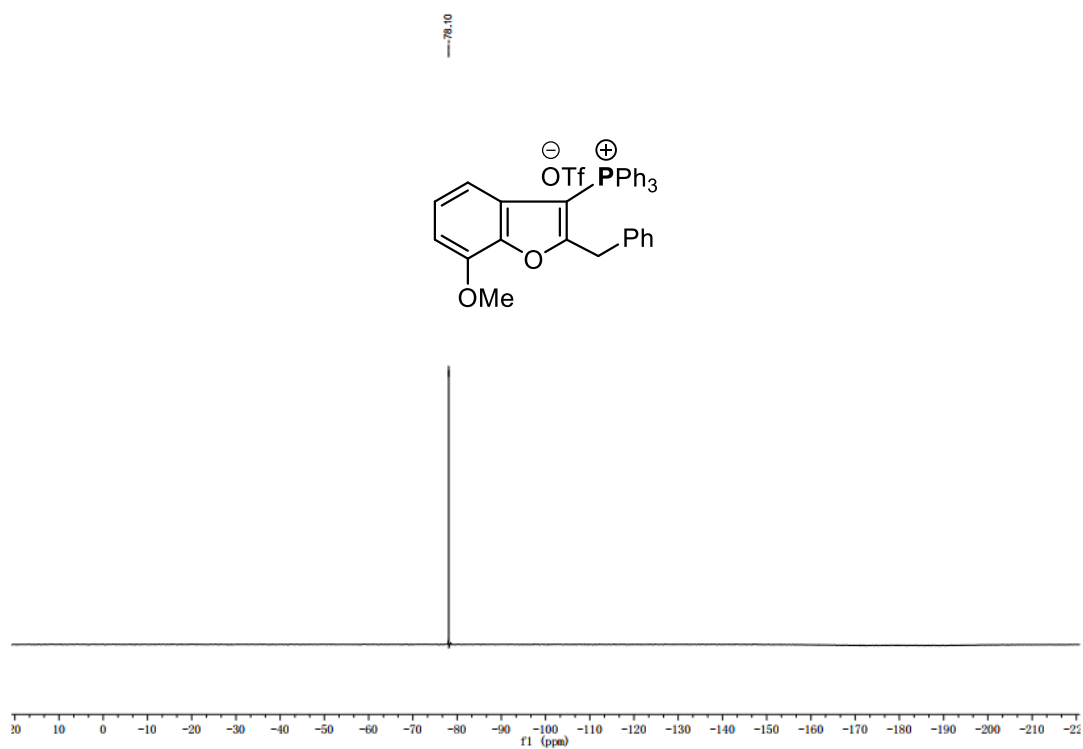

$^{31}\text{P}$  NMR (202 MHz,  $\text{CDCl}_3$ ) of compound **3ka**

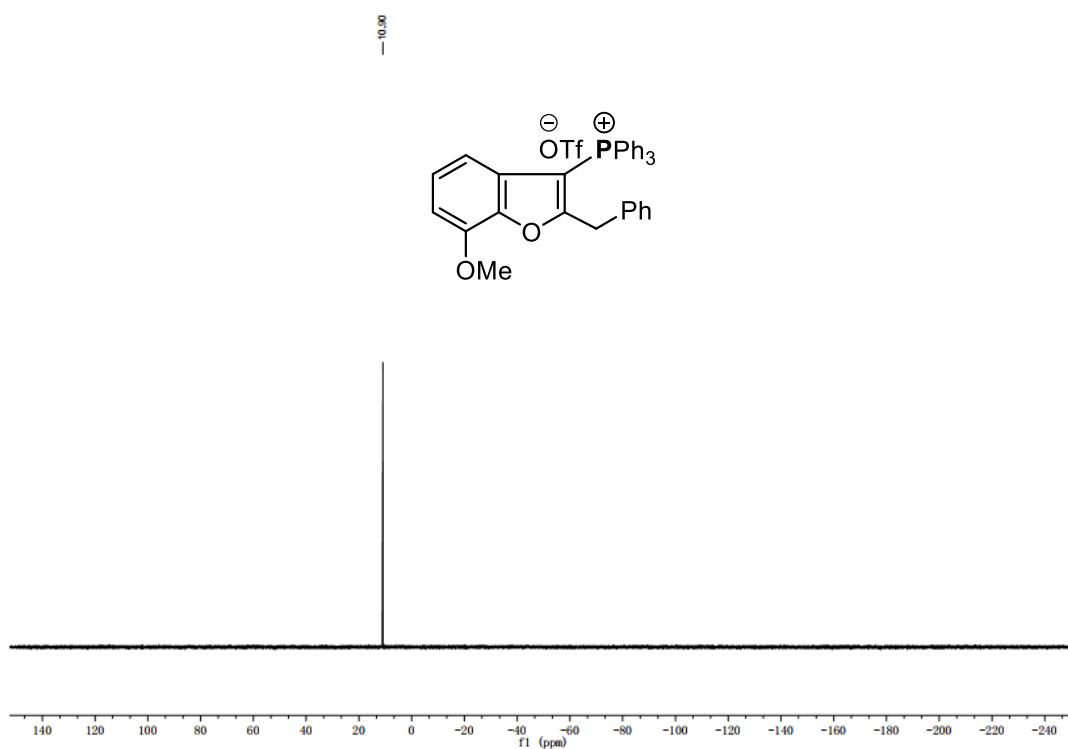

$^1\text{H}$  NMR (500 MHz,  $\text{CDCl}_3$ ) of compound **3la**

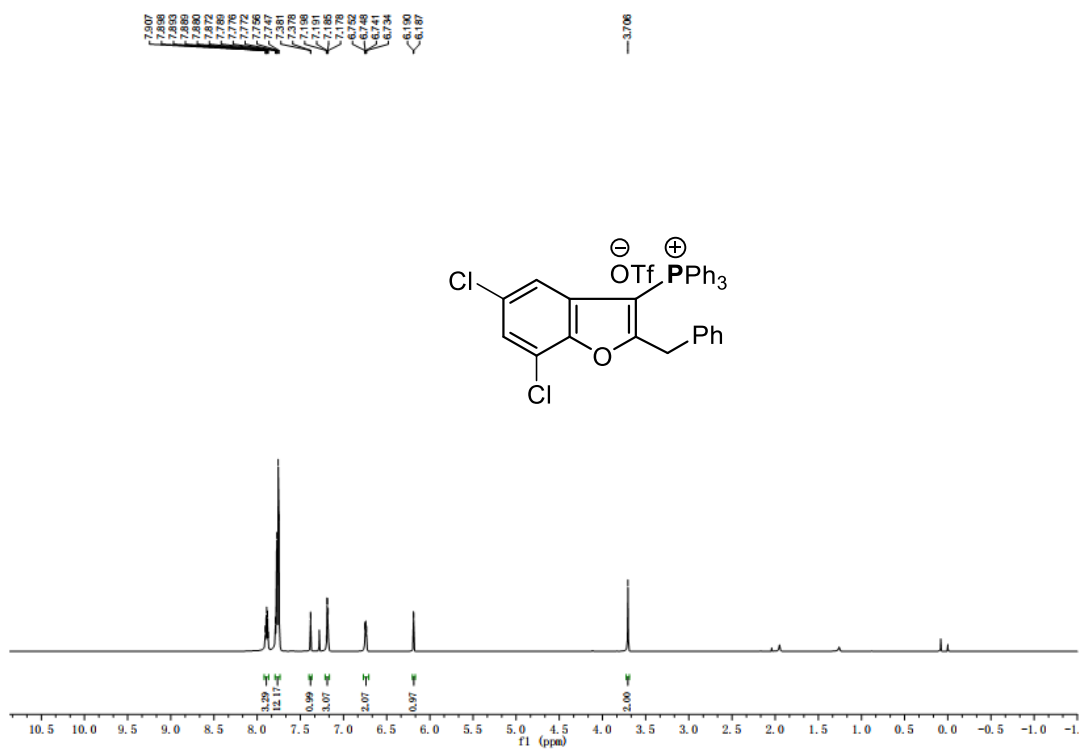

$^{13}\text{C}$  NMR (126 MHz,  $\text{CDCl}_3$ ) of compound **3la**

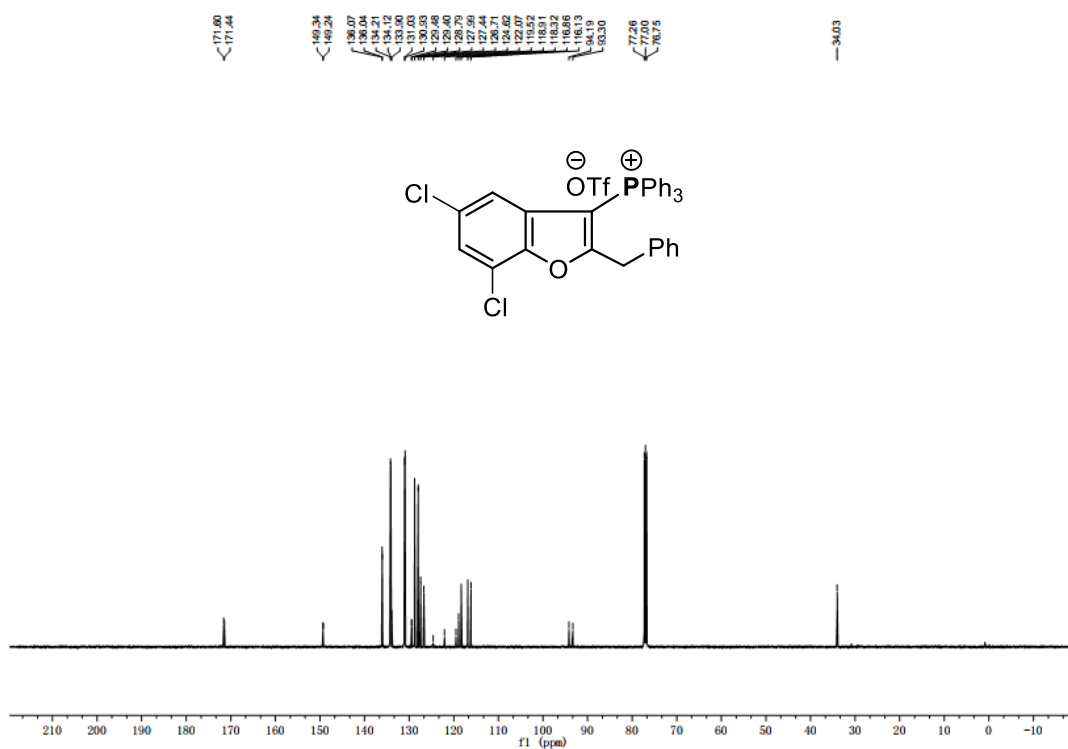

$^{19}\text{F}$  NMR (471 MHz,  $\text{CDCl}_3$ ) of compound **3la**

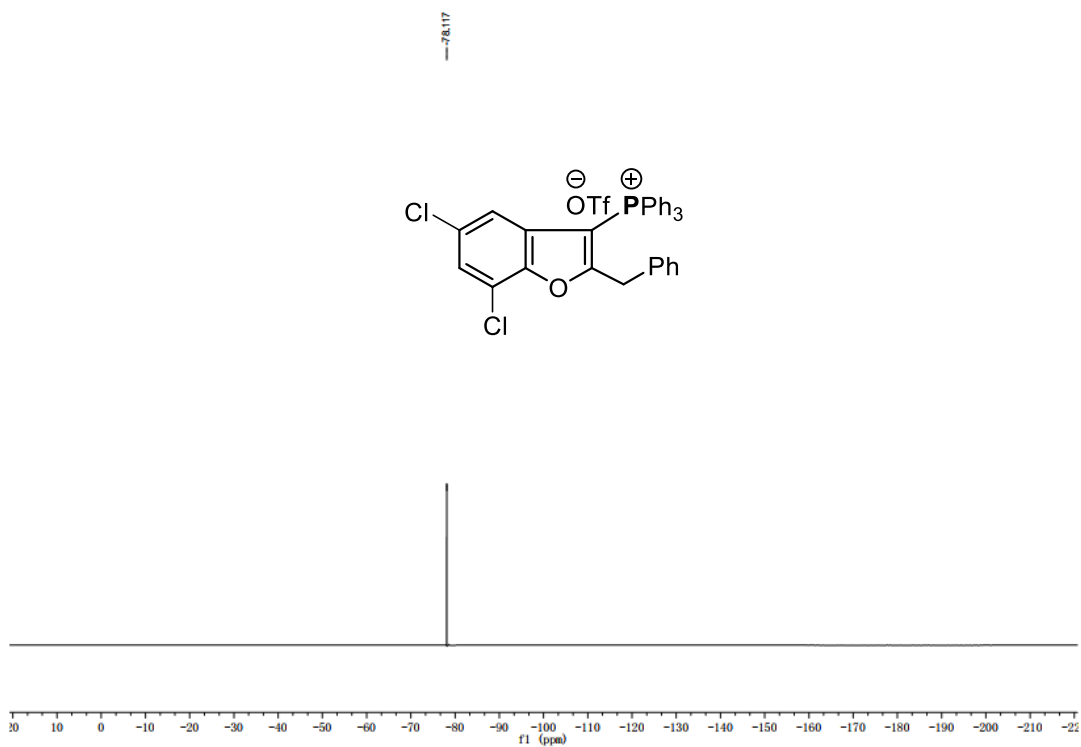



$^{31}\text{P}$  NMR (202 MHz,  $\text{CDCl}_3$ ) of compound **3la**

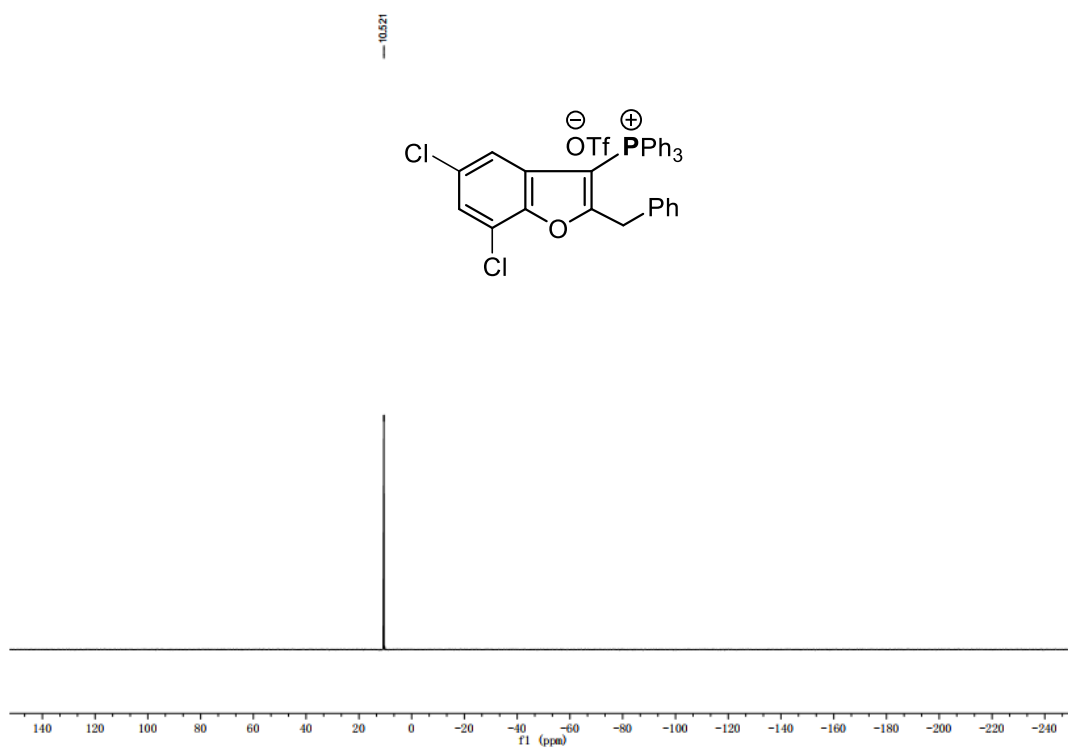

$^1\text{H}$  NMR (500 MHz,  $\text{CDCl}_3$ ) of compound **3ma**

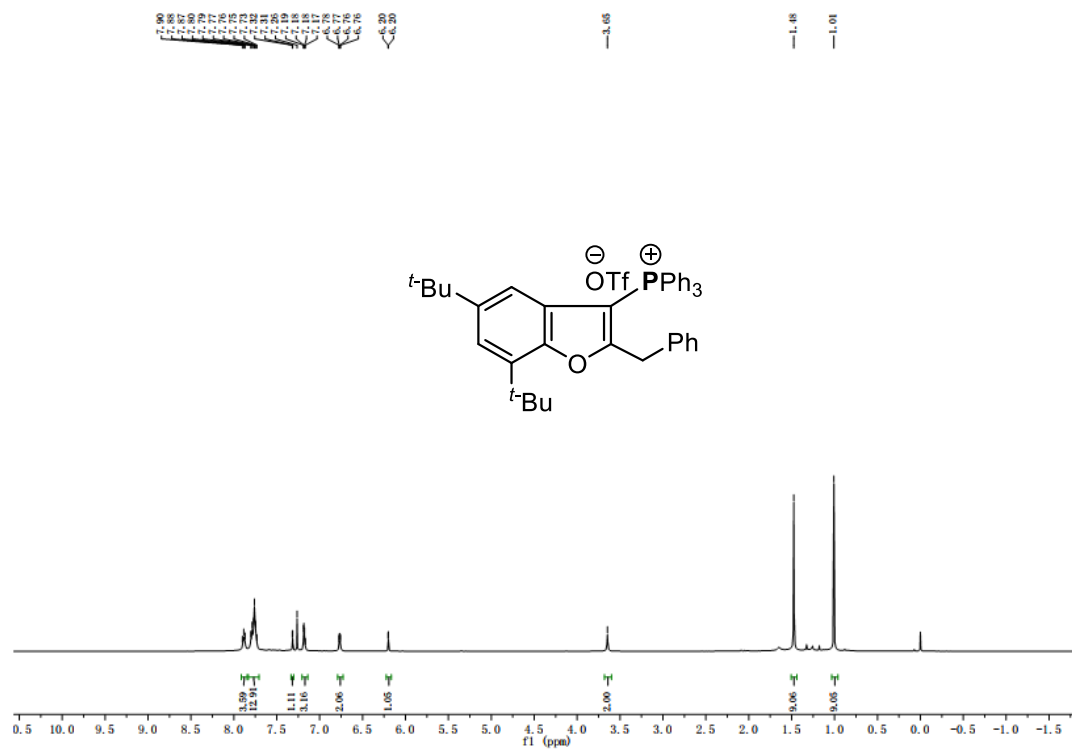

$^{13}\text{C}$  NMR (126 MHz,  $\text{CDCl}_3$ ) of compound **3ma**

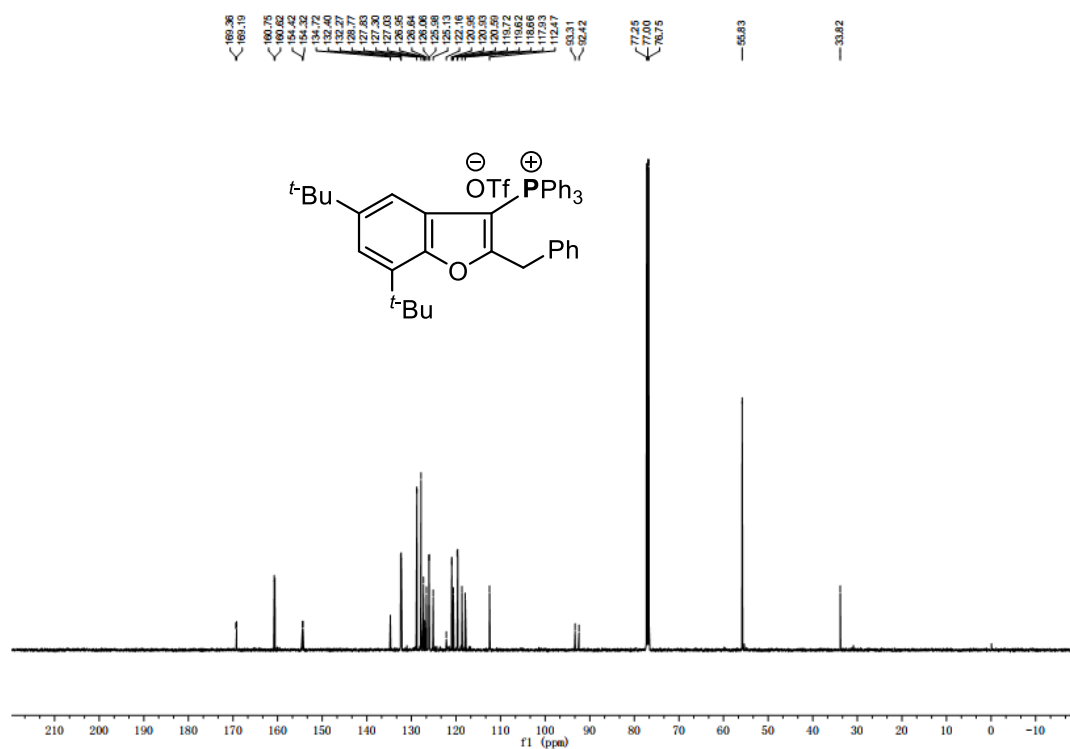

$^{19}\text{F}$  NMR (471 MHz,  $\text{CDCl}_3$ ) of compound **3ma**

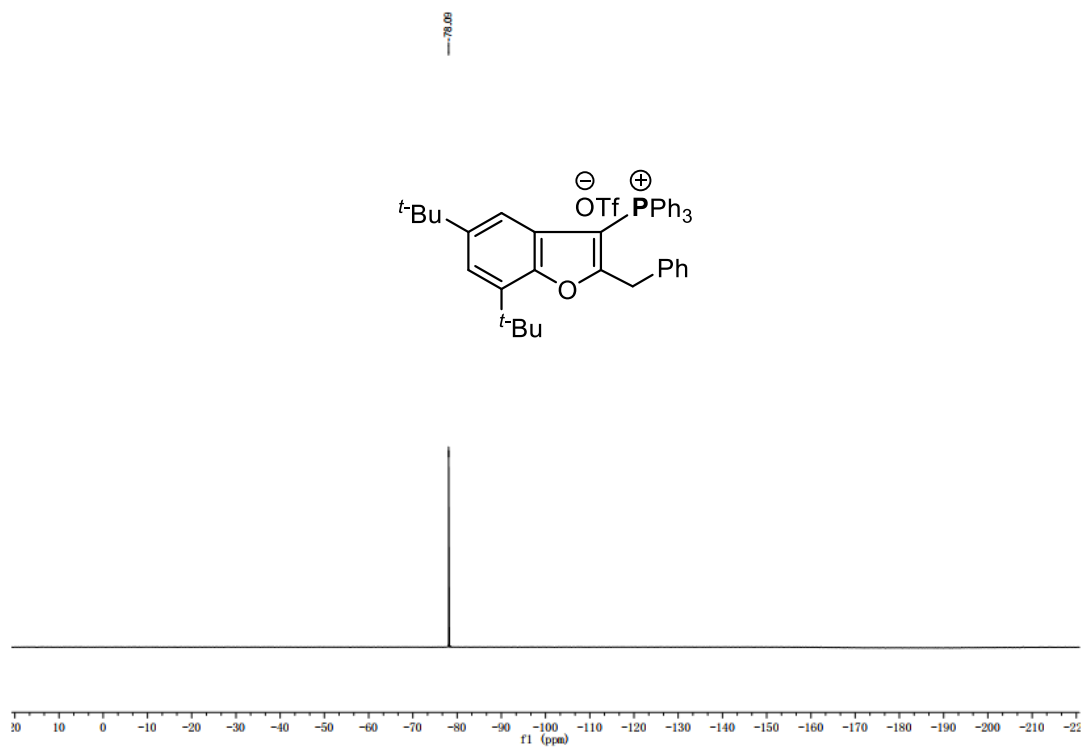

$^{31}\text{P}$  NMR (202 MHz,  $\text{CDCl}_3$ ) of compound **3ma**

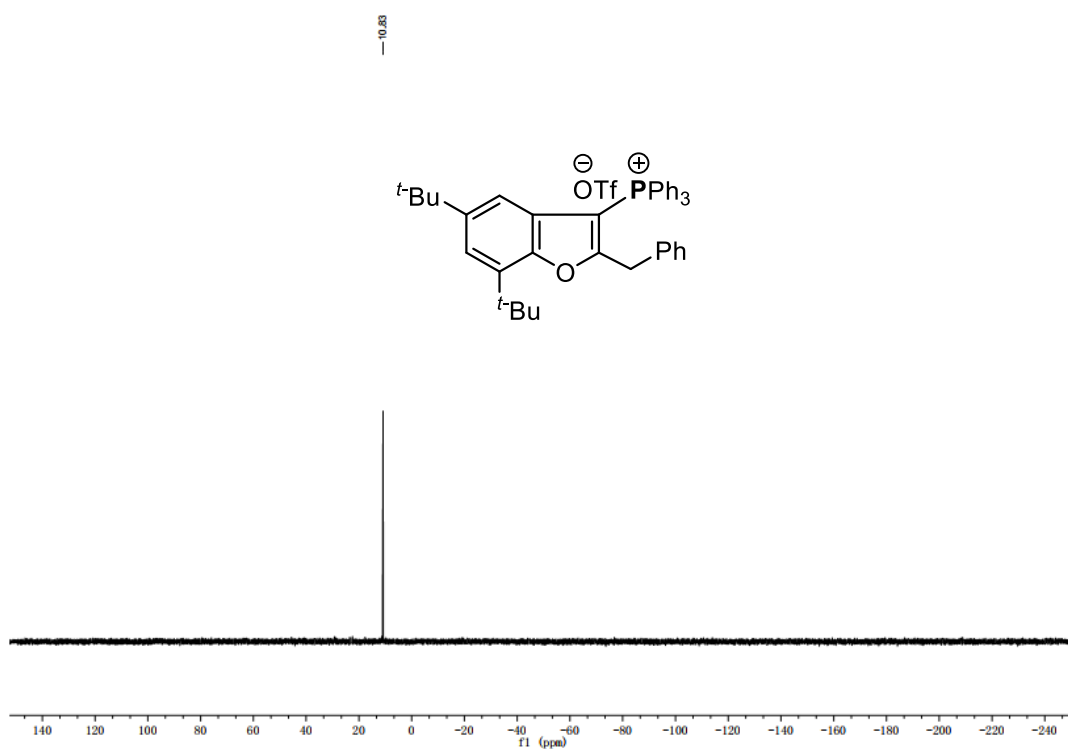

$^1\text{H}$  NMR (500 MHz,  $\text{CDCl}_3$ ) of compound **3na**

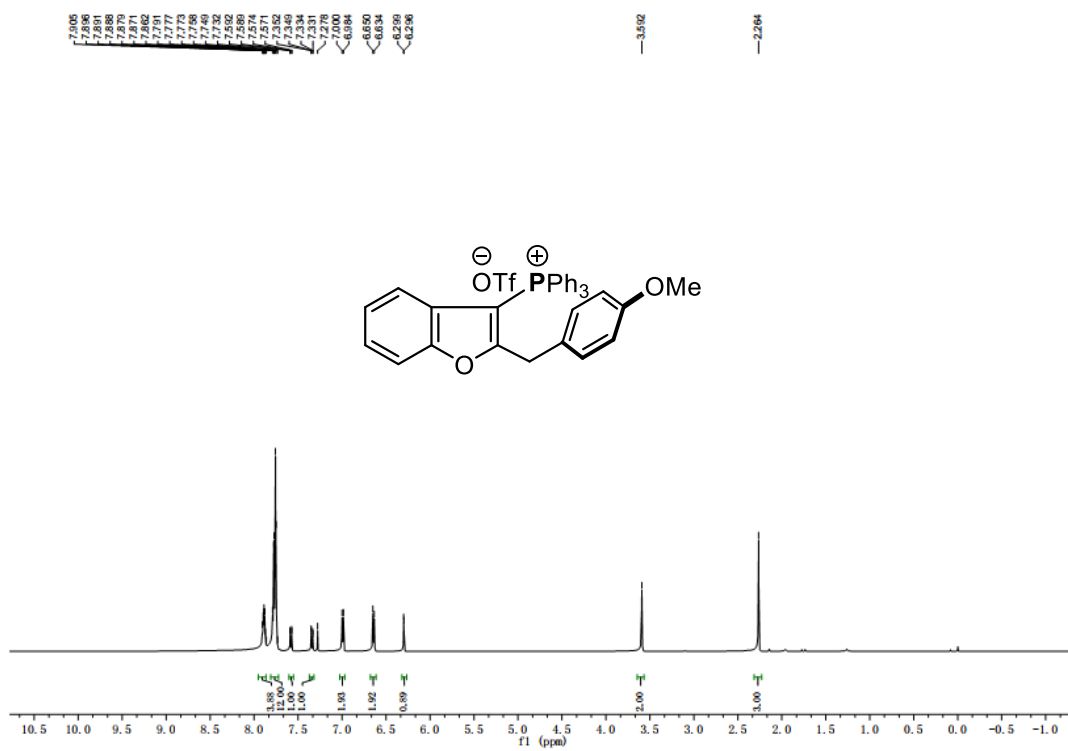

$^{13}\text{C}$  NMR (126 MHz,  $\text{CDCl}_3$ ) of compound **3na**

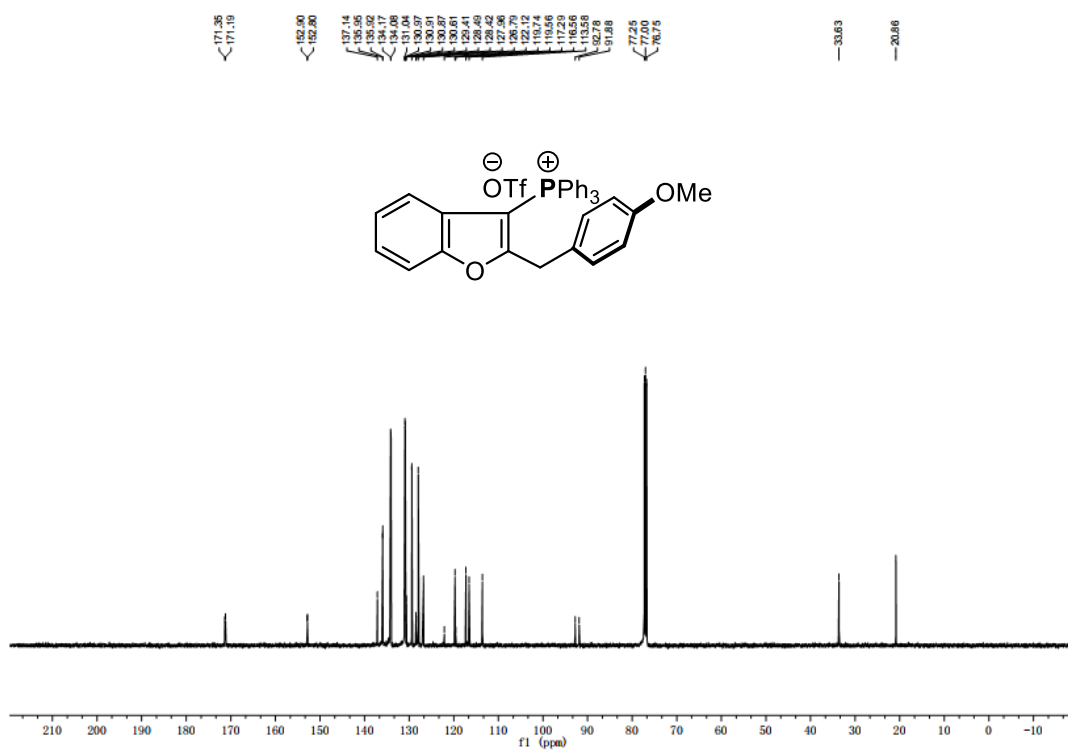

$^{19}\text{F}$  NMR (471 MHz,  $\text{CDCl}_3$ ) of compound **3na**

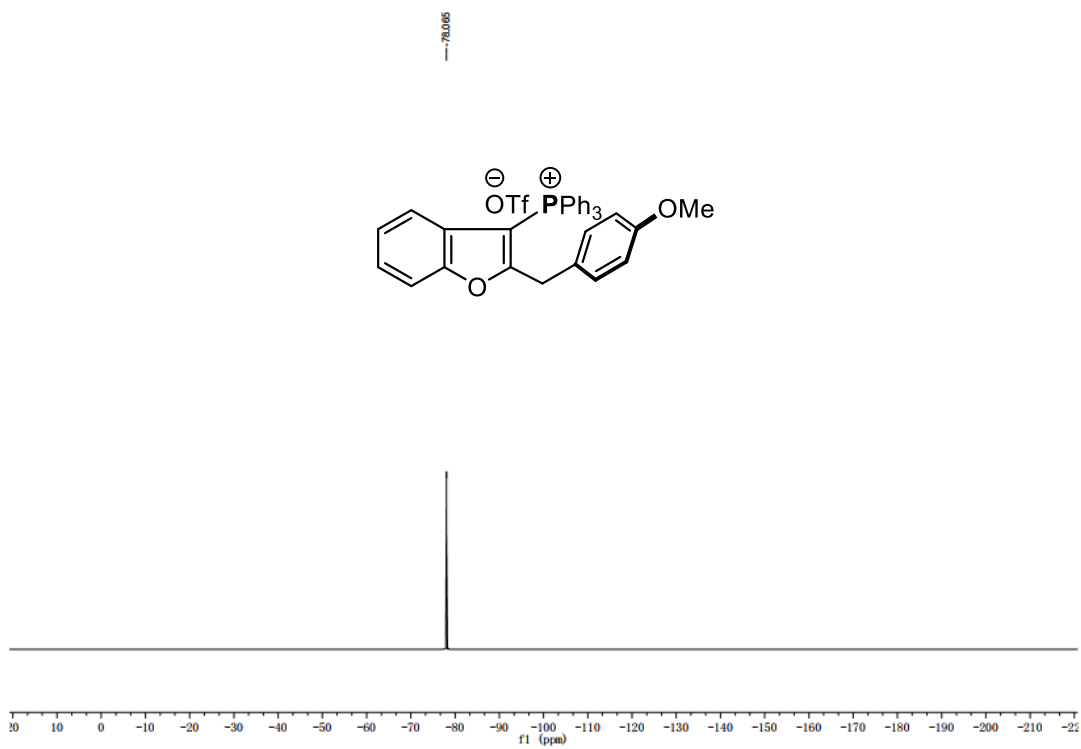

$^{31}\text{P}$  NMR (202 MHz,  $\text{CDCl}_3$ ) of compound **3na**

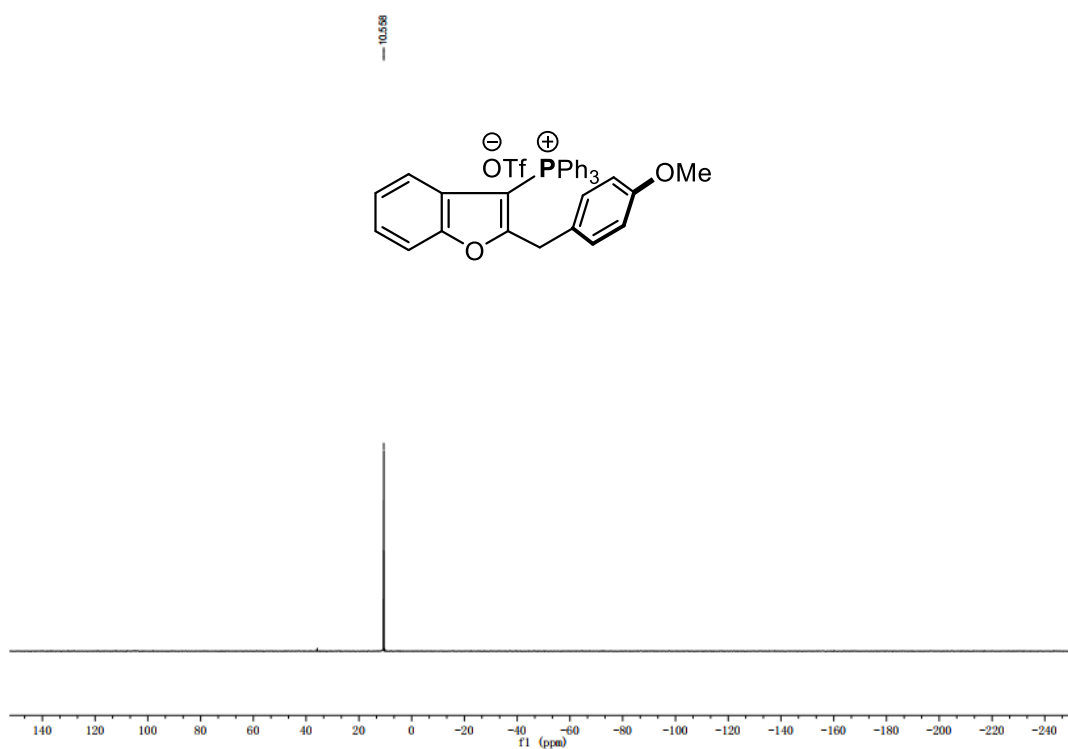

$^1\text{H}$  NMR (500 MHz,  $\text{CDCl}_3$ ) of compound **3oa**

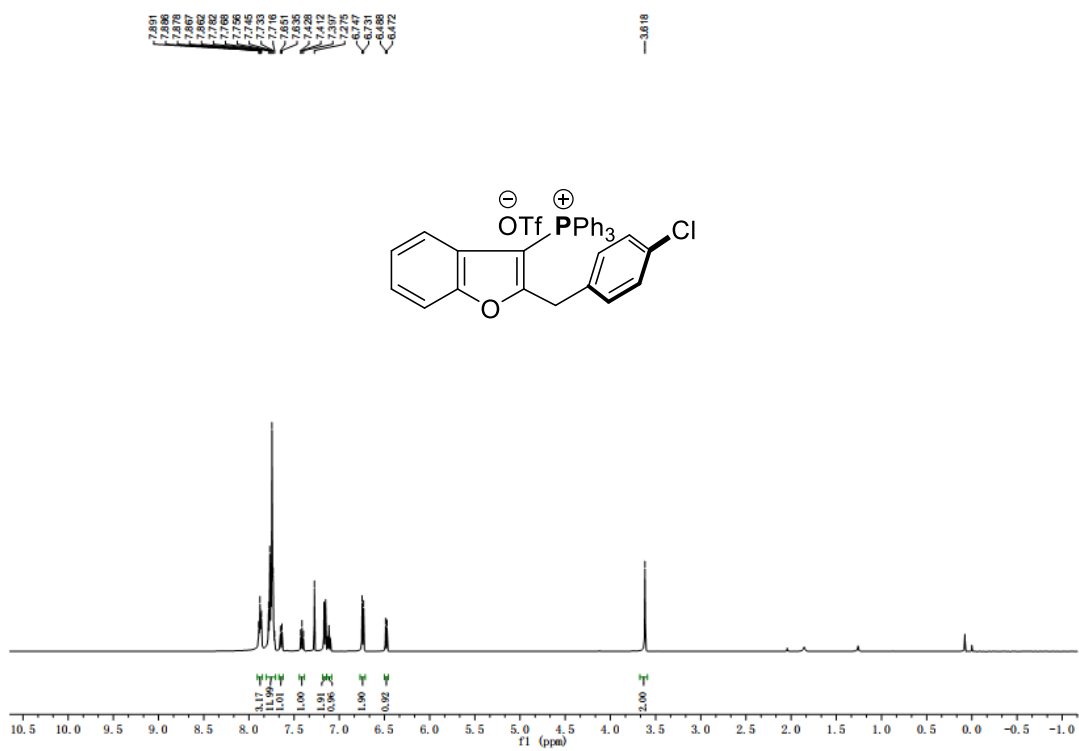

$^{13}\text{C}$  NMR (126 MHz,  $\text{CDCl}_3$ ) of compound **30a**

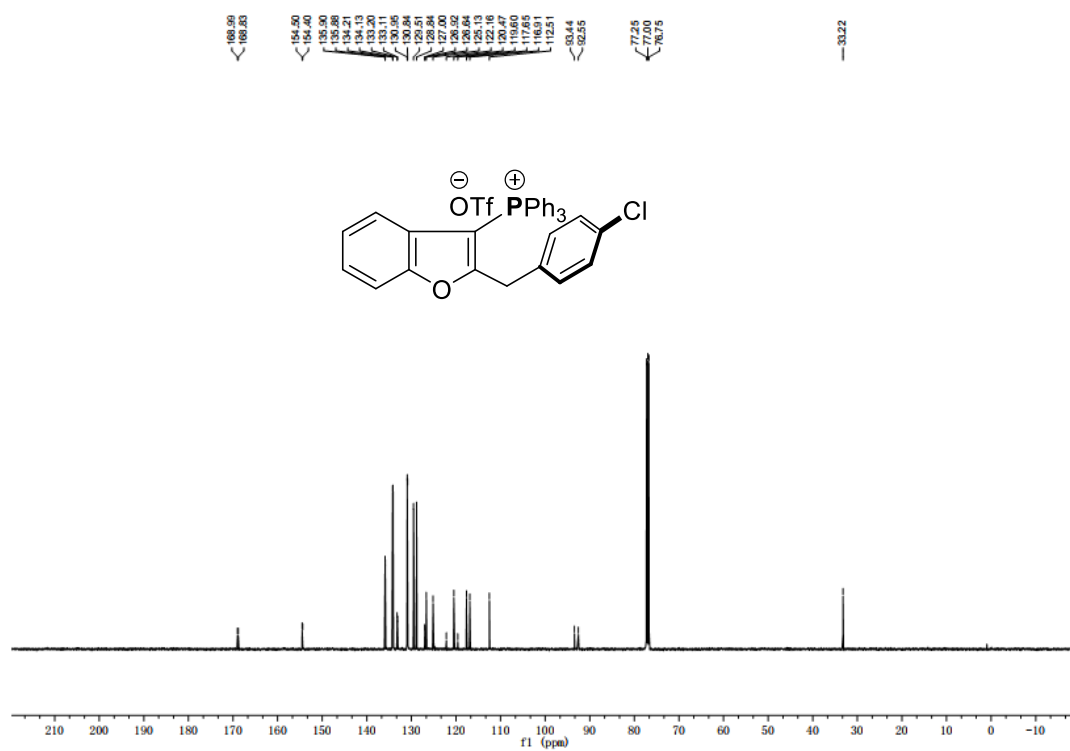

$^{19}\text{F}$  NMR (471 MHz,  $\text{CDCl}_3$ ) of compound **30a**

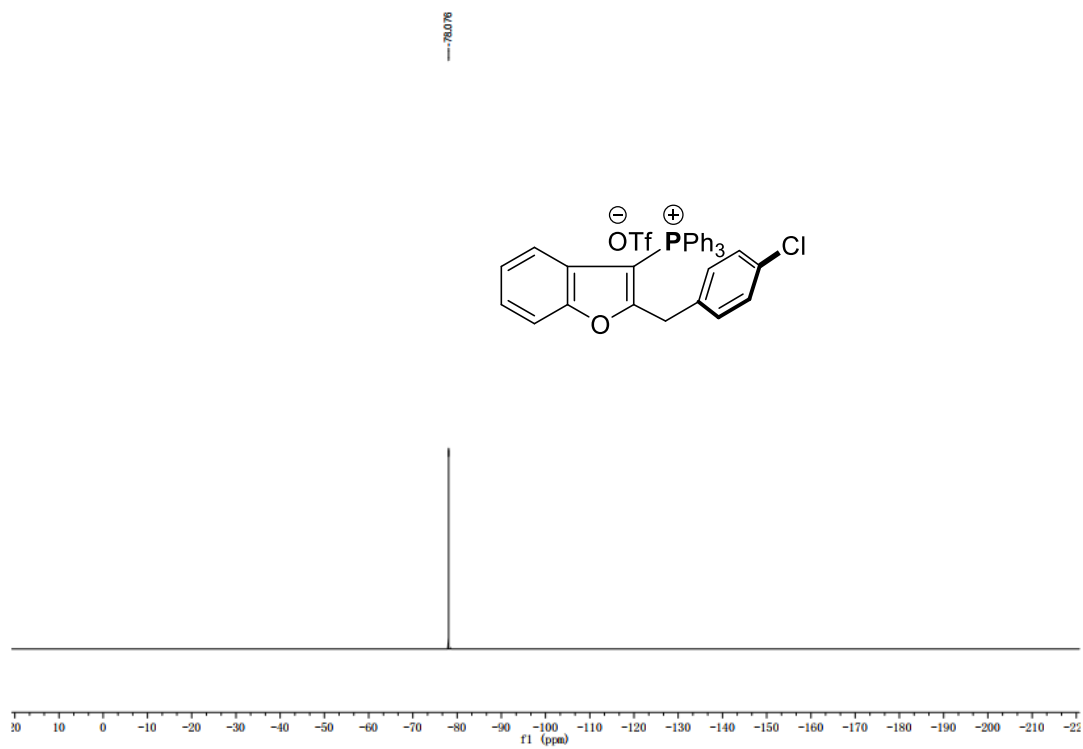

$^{31}\text{P}$  NMR (202 MHz,  $\text{CDCl}_3$ ) of compound **30a**

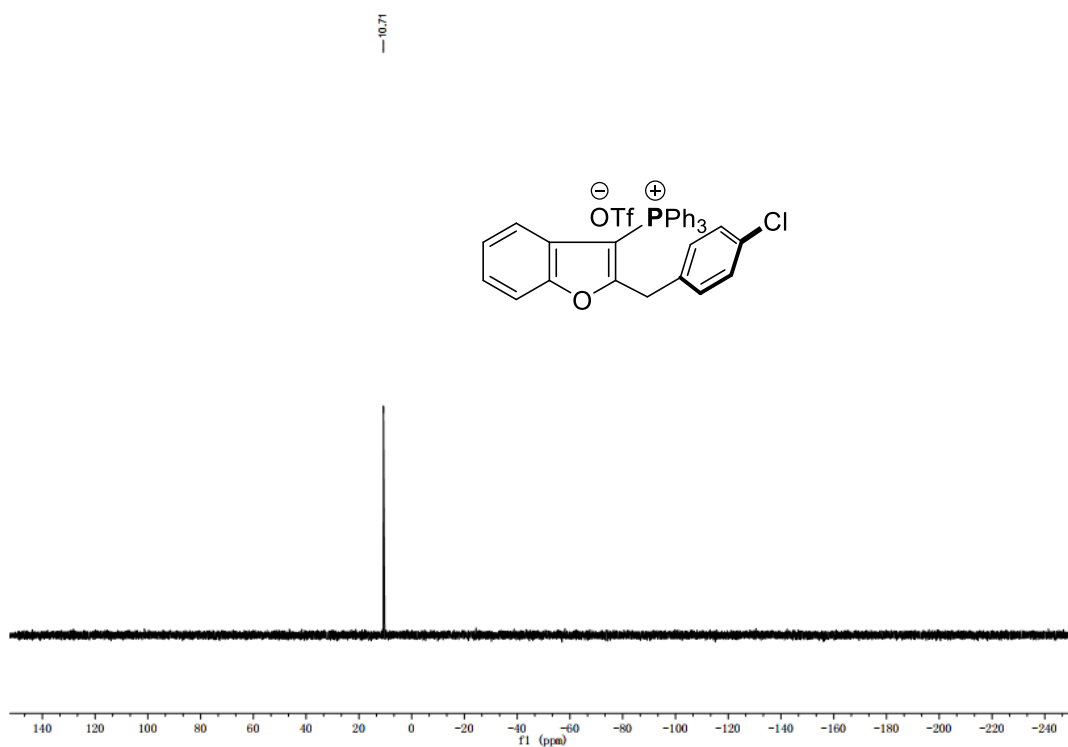

$^1\text{H}$  NMR (500 MHz,  $\text{CDCl}_3$ ) of compound **3pa**

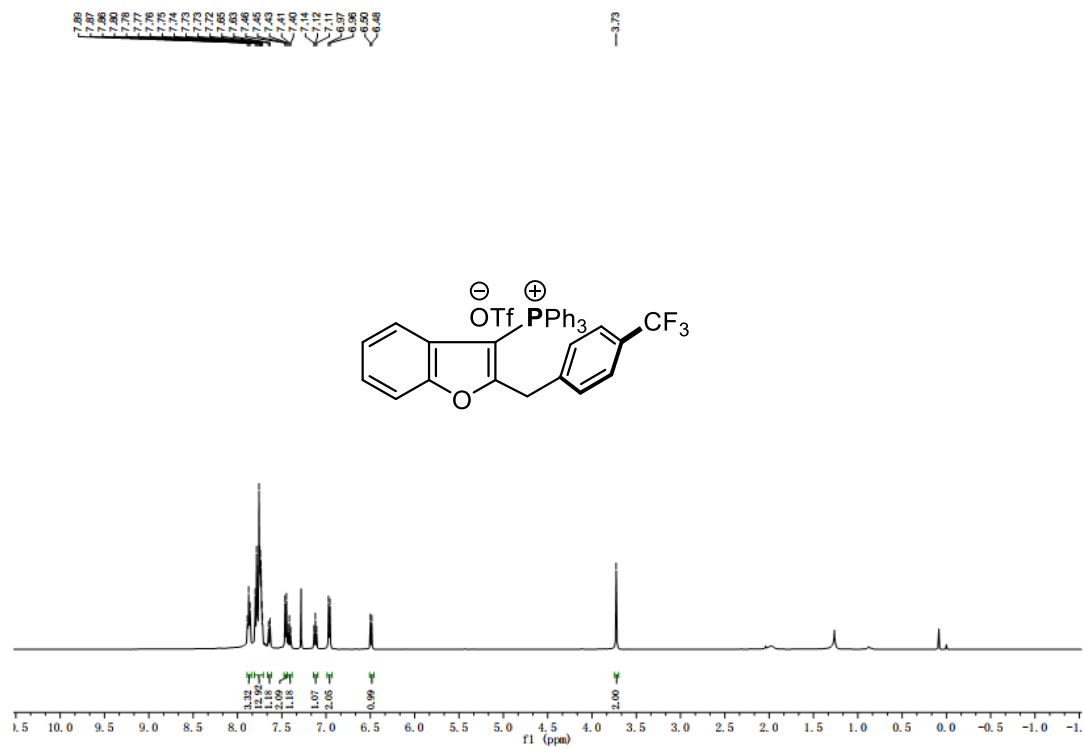

$^{13}\text{C}$  NMR (126 MHz,  $\text{CDCl}_3$ ) of compound **3pa**

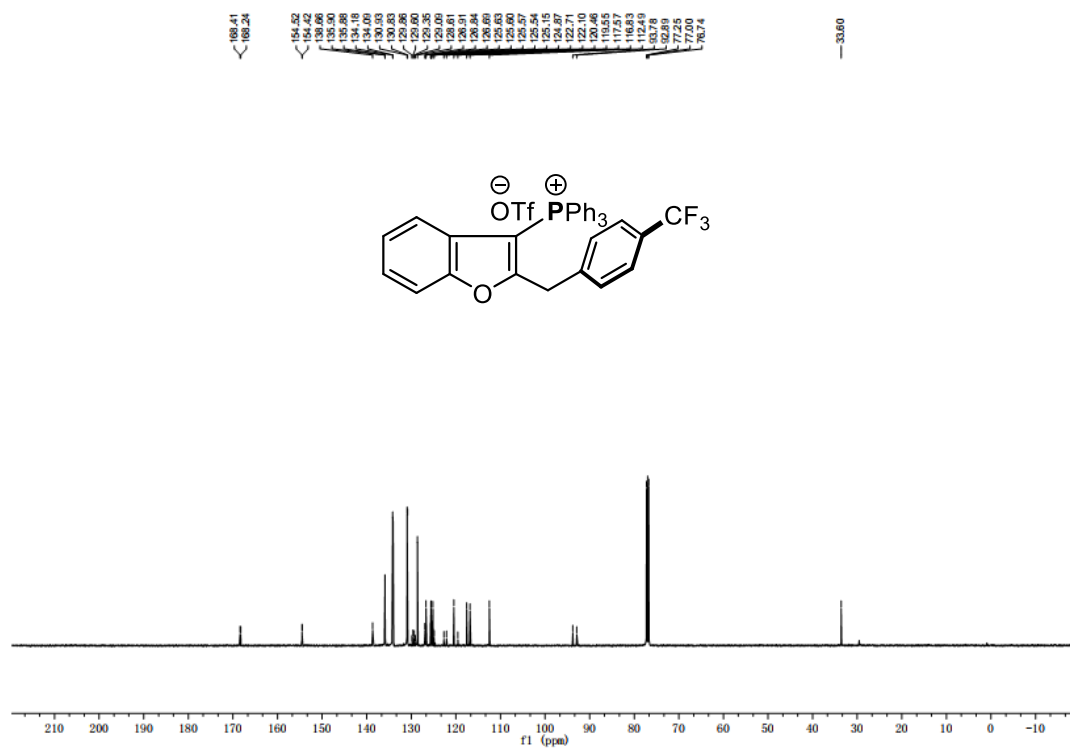

$^{19}\text{F}$  NMR (471 MHz,  $\text{CDCl}_3$ ) of compound **3pa**

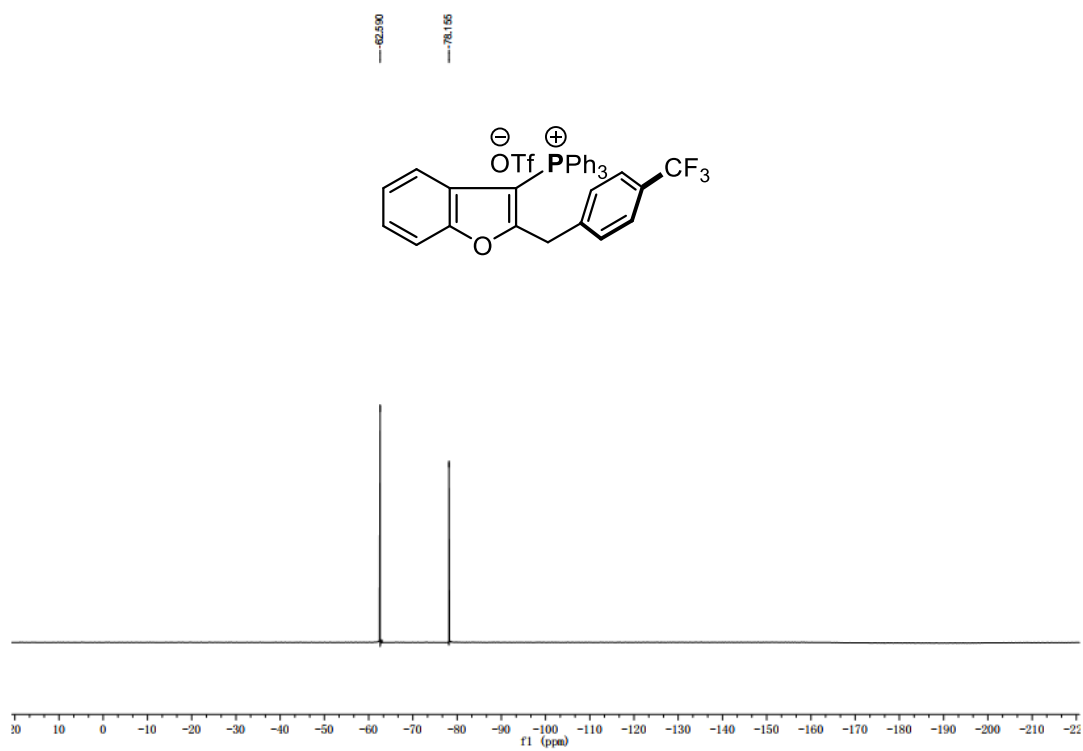



$^{31}\text{P}$  NMR (202 MHz,  $\text{CDCl}_3$ ) of compound **3pa**

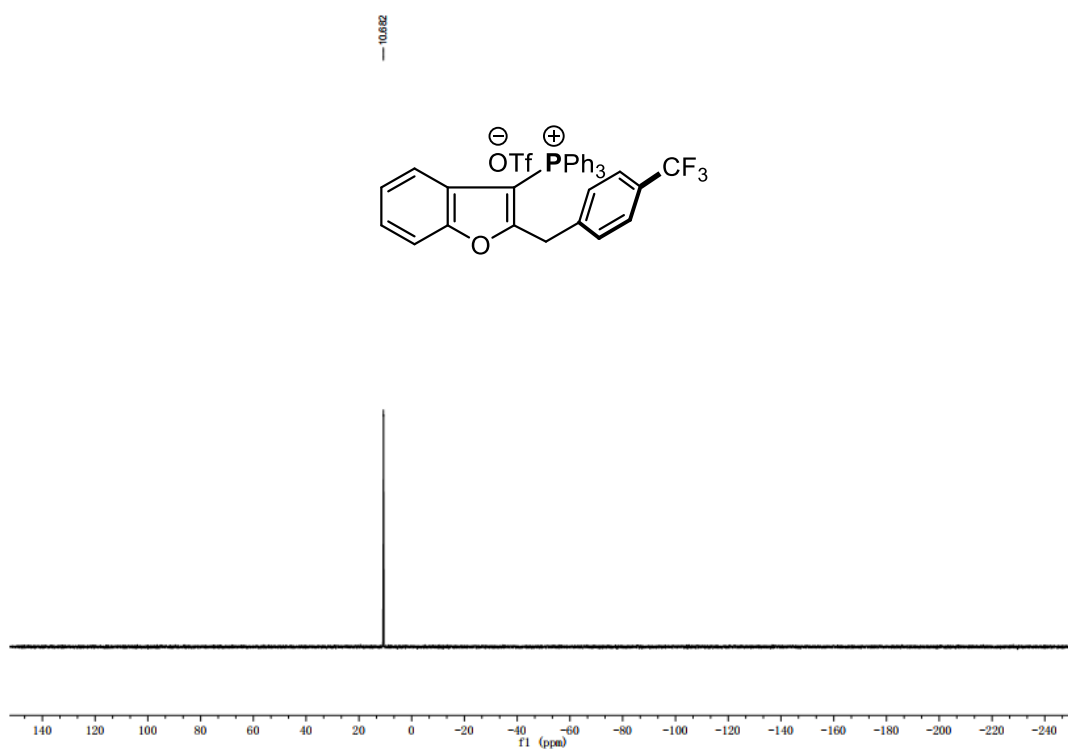

$^1\text{H}$  NMR (500 MHz,  $\text{CDCl}_3$ ) of compound **3qa**

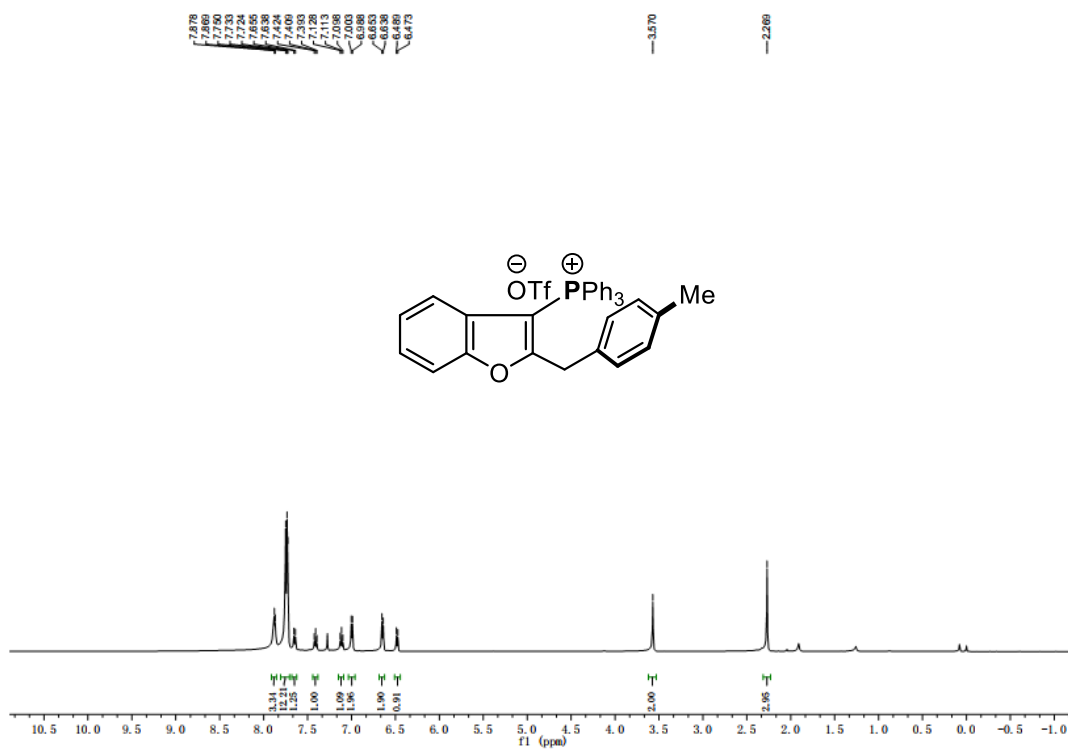

$^{13}\text{C}$  NMR (126 MHz,  $\text{CDCl}_3$ ) of compound **3qa**

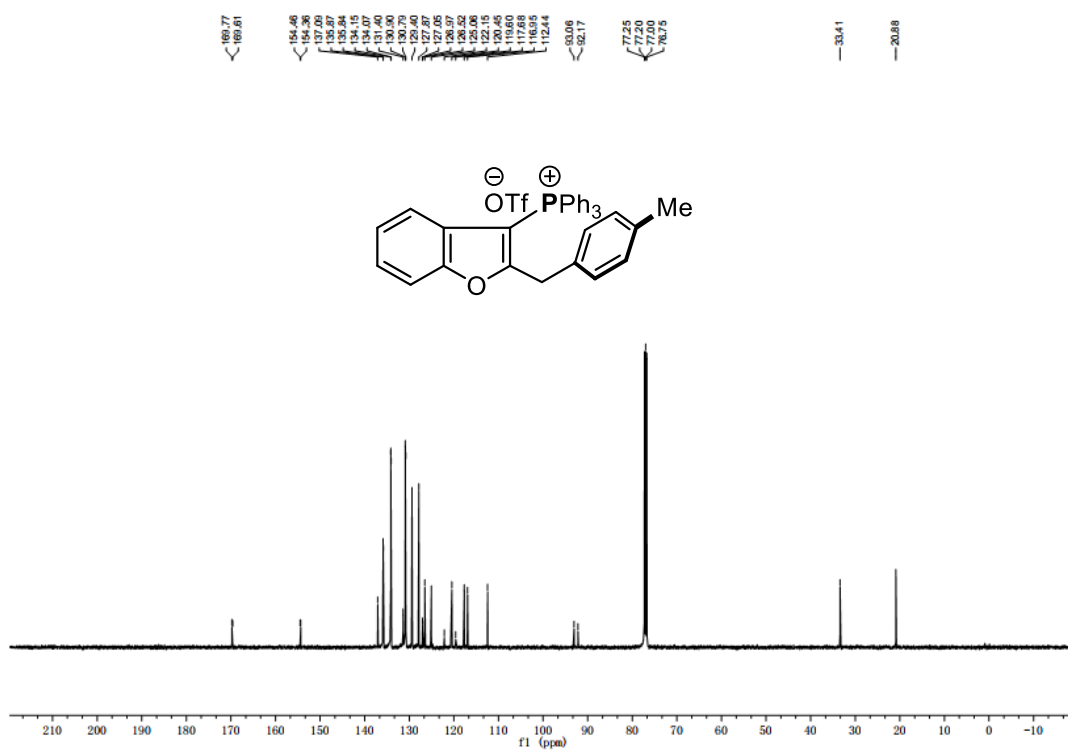

$^{19}\text{F}$  NMR (471 MHz,  $\text{CDCl}_3$ ) of compound **3qa**

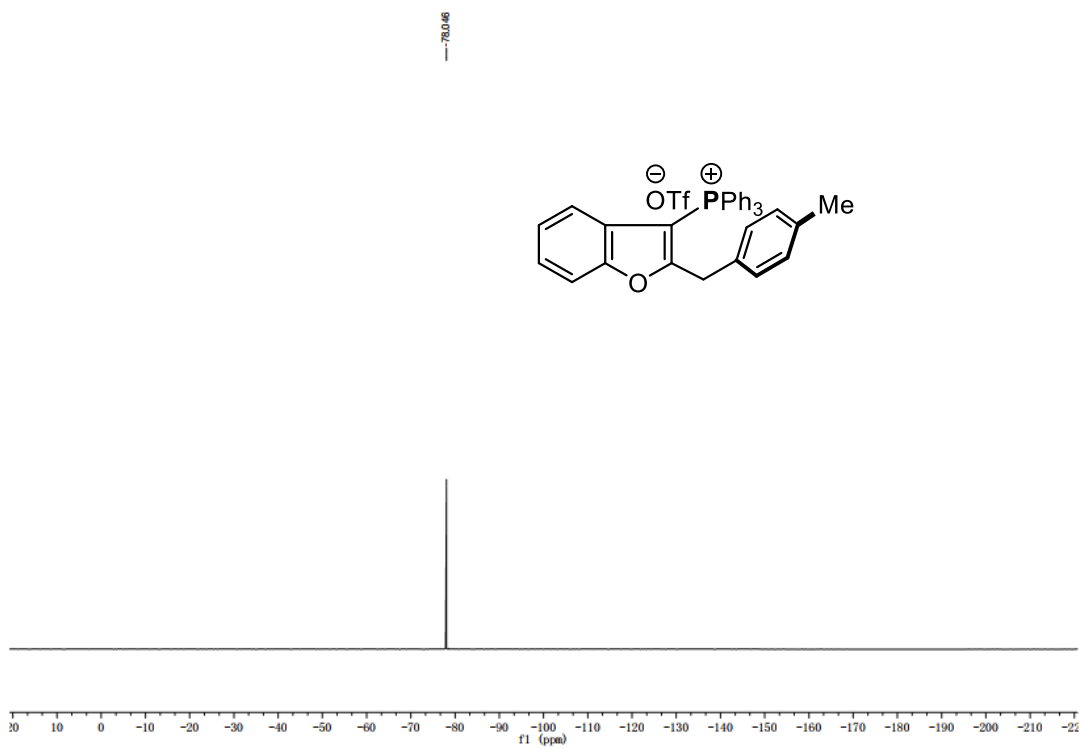

$^{31}\text{P}$  NMR (202 MHz,  $\text{CDCl}_3$ ) of compound **3qa**

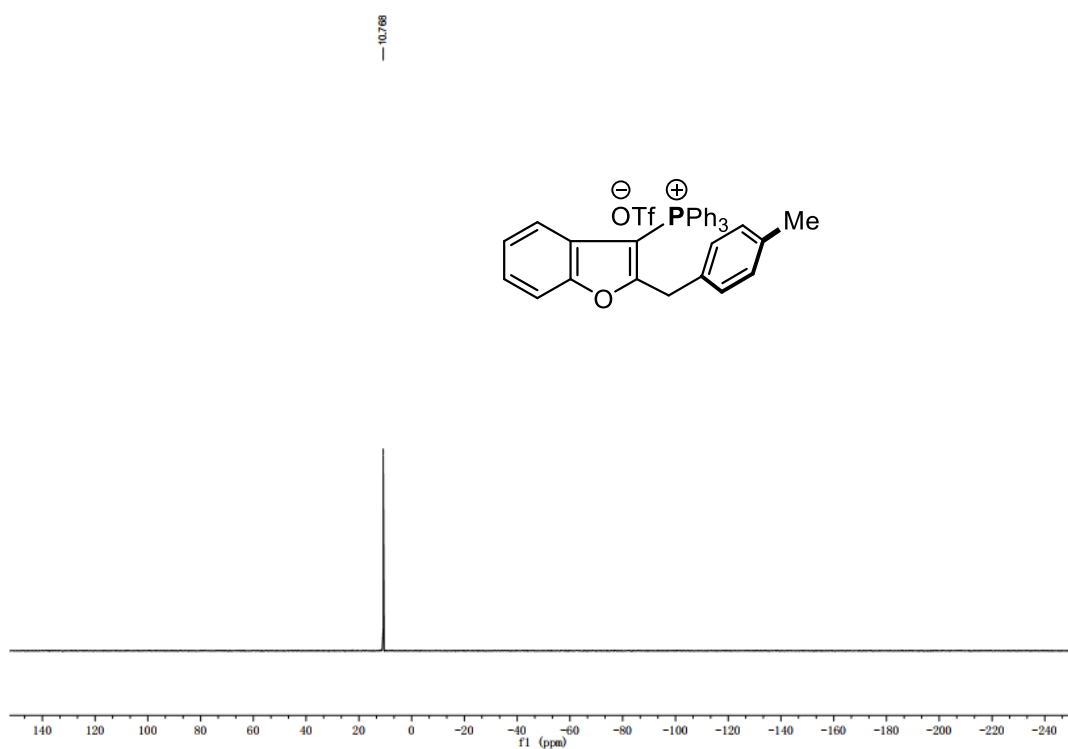

$^1\text{H}$  NMR (500 MHz,  $\text{CDCl}_3$ ) of compound **3ra**

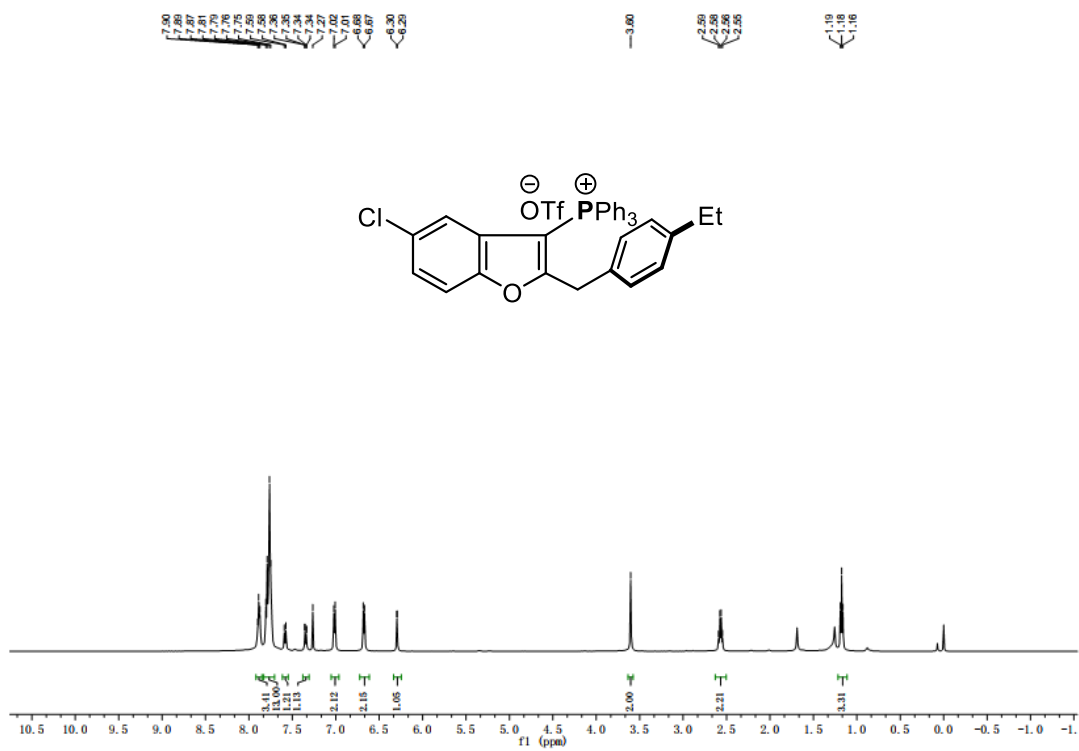

$^{13}\text{C}$  NMR (126 MHz,  $\text{CDCl}_3$ ) of compound **3ra**

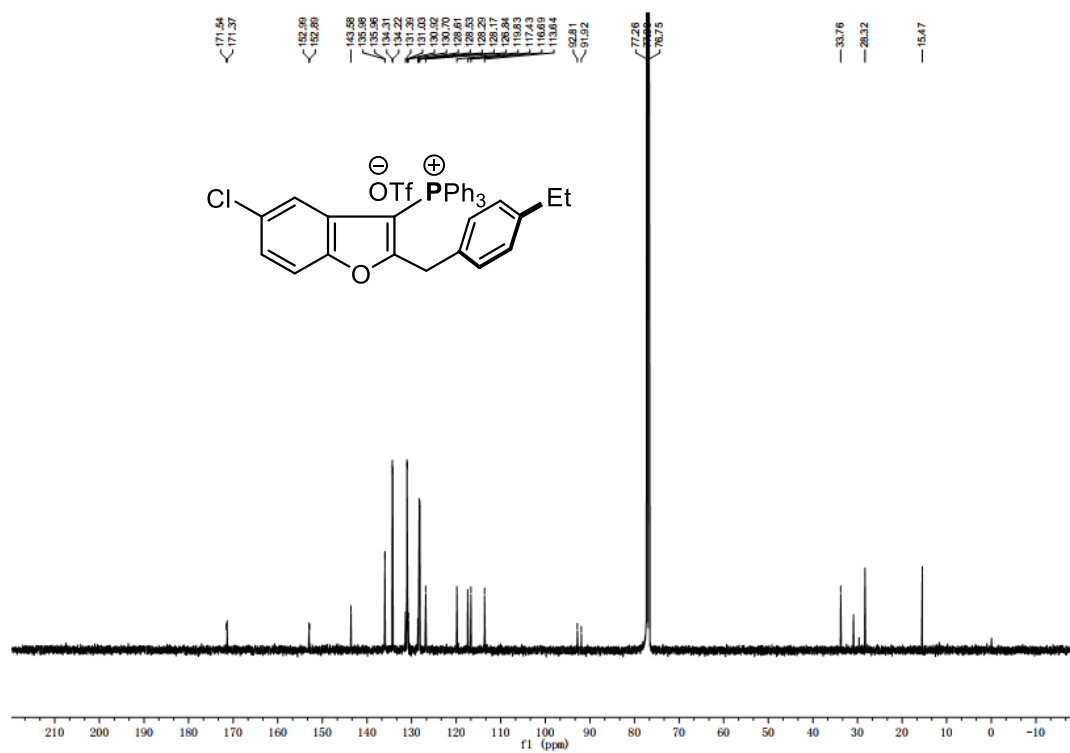

$^{19}\text{F}$  NMR (471 MHz,  $\text{CDCl}_3$ ) of compound **3ra**

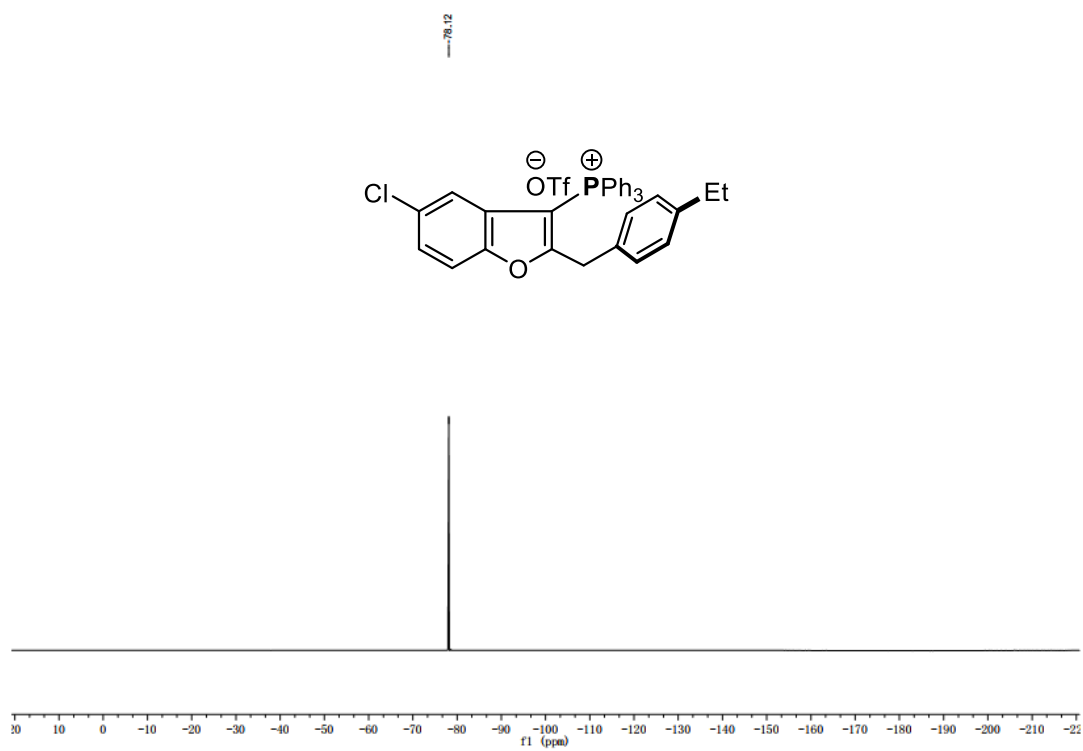



$^{13}\text{C}$  NMR (126 MHz,  $\text{CDCl}_3$ ) of compound **3sa**

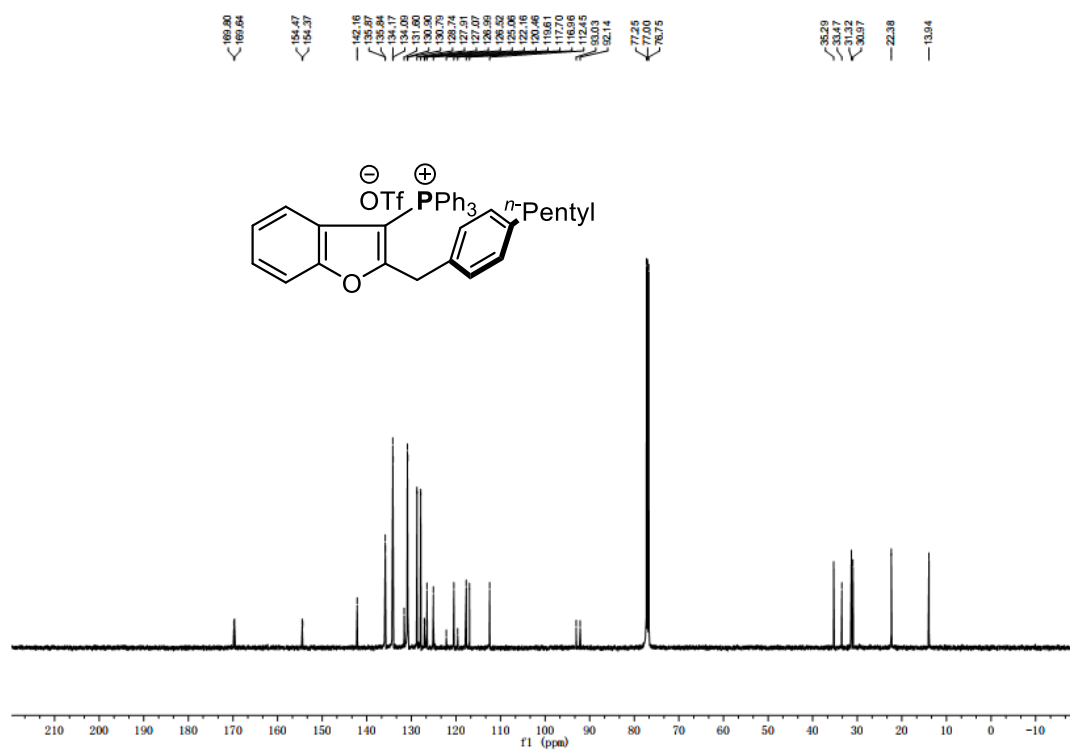

$^{19}\text{F}$  NMR (471 MHz,  $\text{CDCl}_3$ ) of compound **3sa**

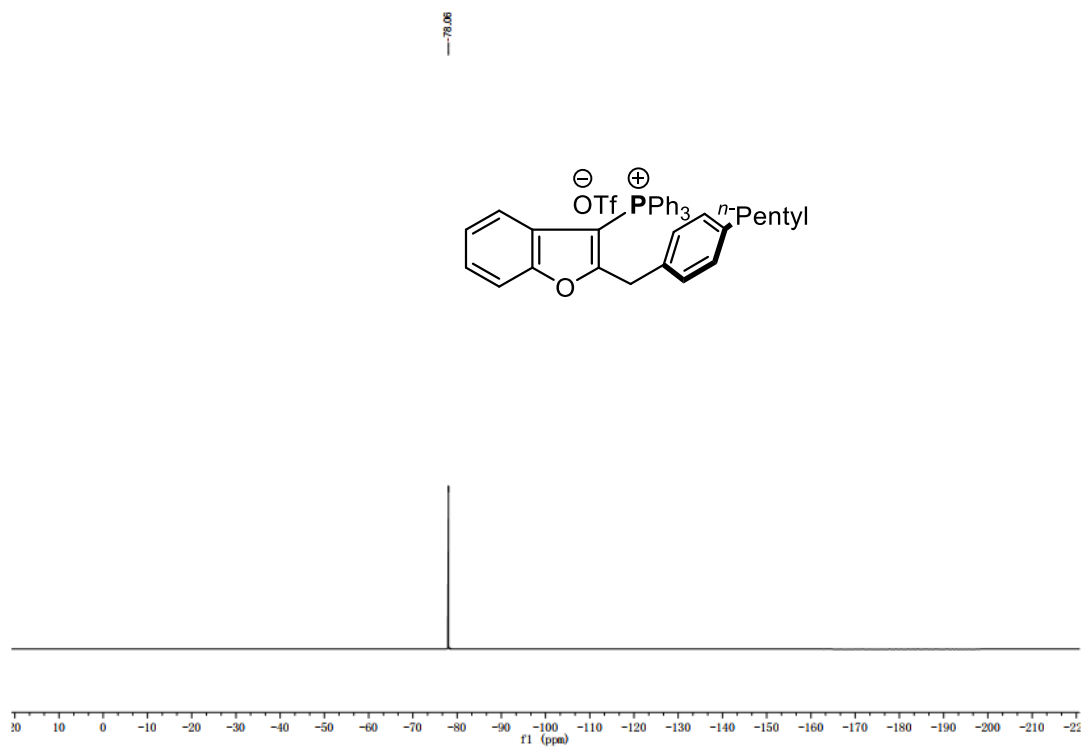

$^{31}\text{P}$  NMR (202 MHz,  $\text{CDCl}_3$ ) of compound **3sa**

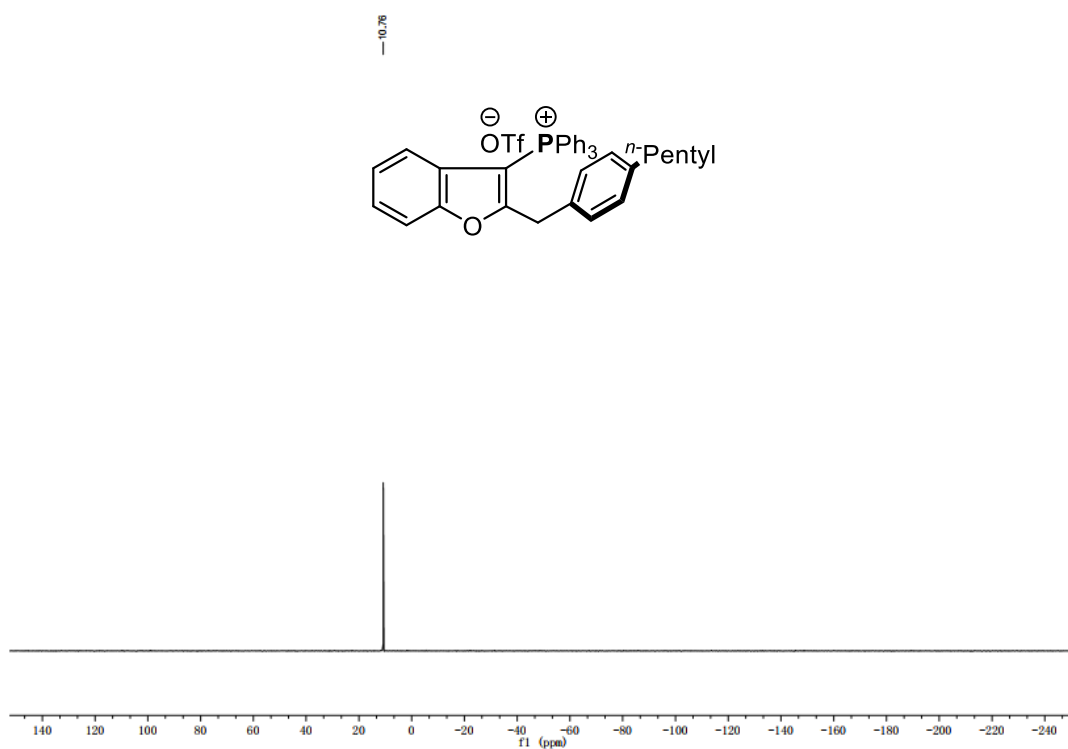

$^1\text{H}$  NMR (500 MHz,  $\text{CDCl}_3$ ) of compound **3ta**

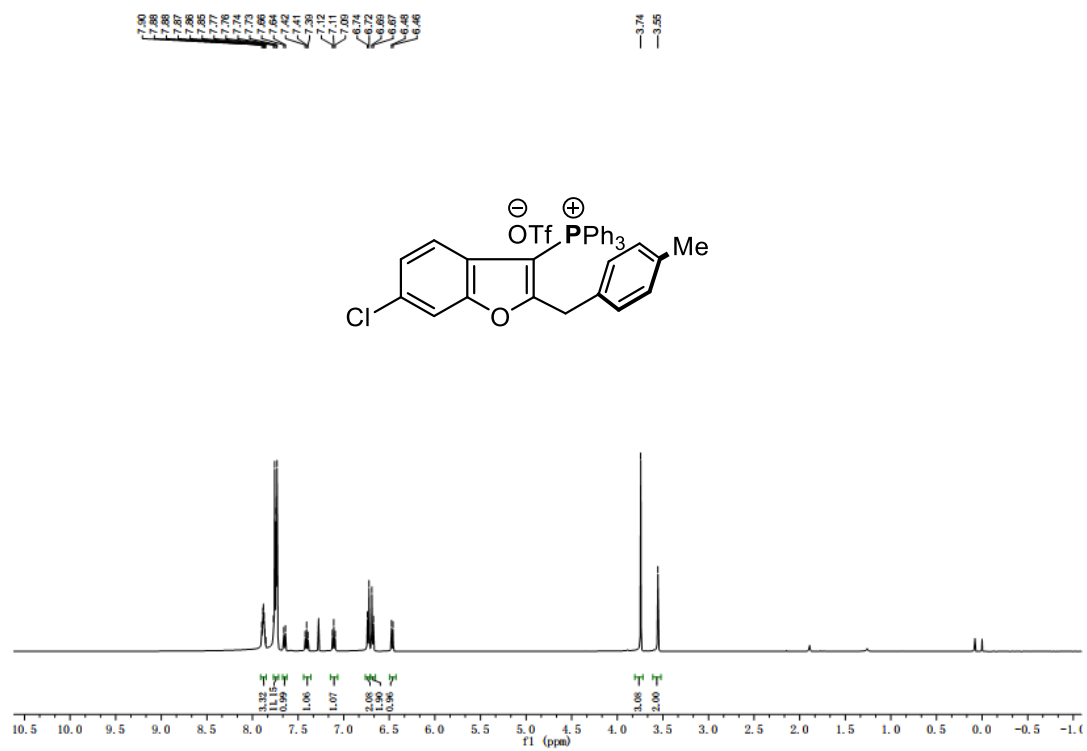

$^{13}\text{C}$  NMR (126 MHz,  $\text{CDCl}_3$ ) of compound **3ta**

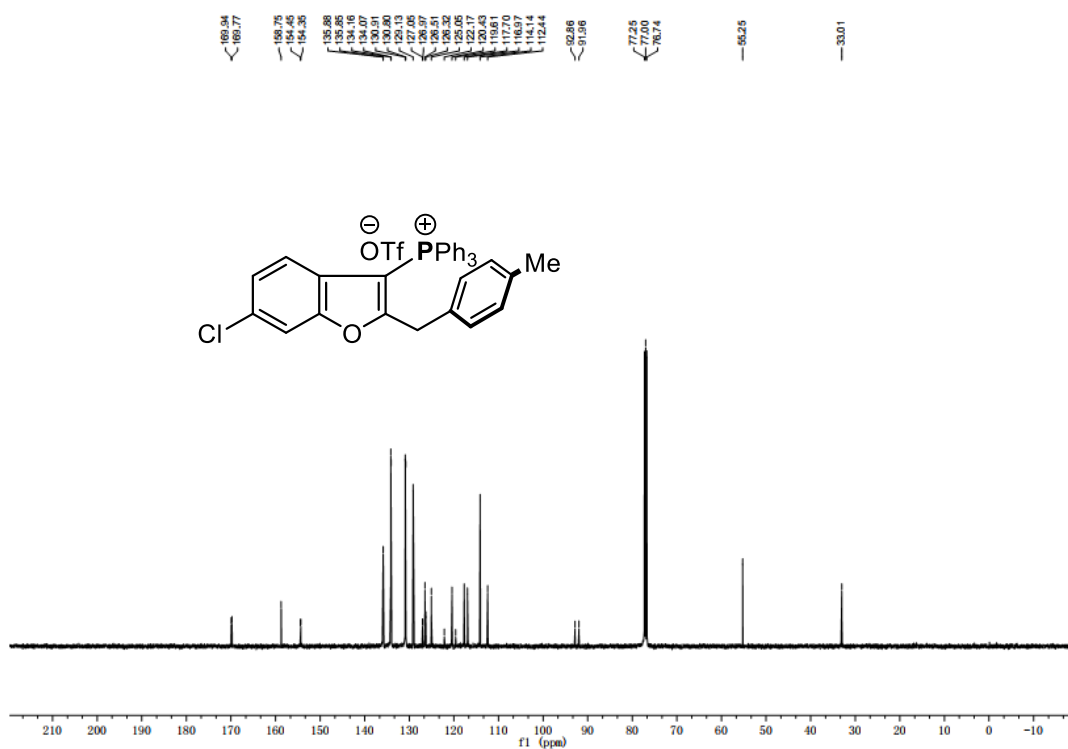

$^{19}\text{F}$  NMR (471 MHz,  $\text{CDCl}_3$ ) of compound **3ta**

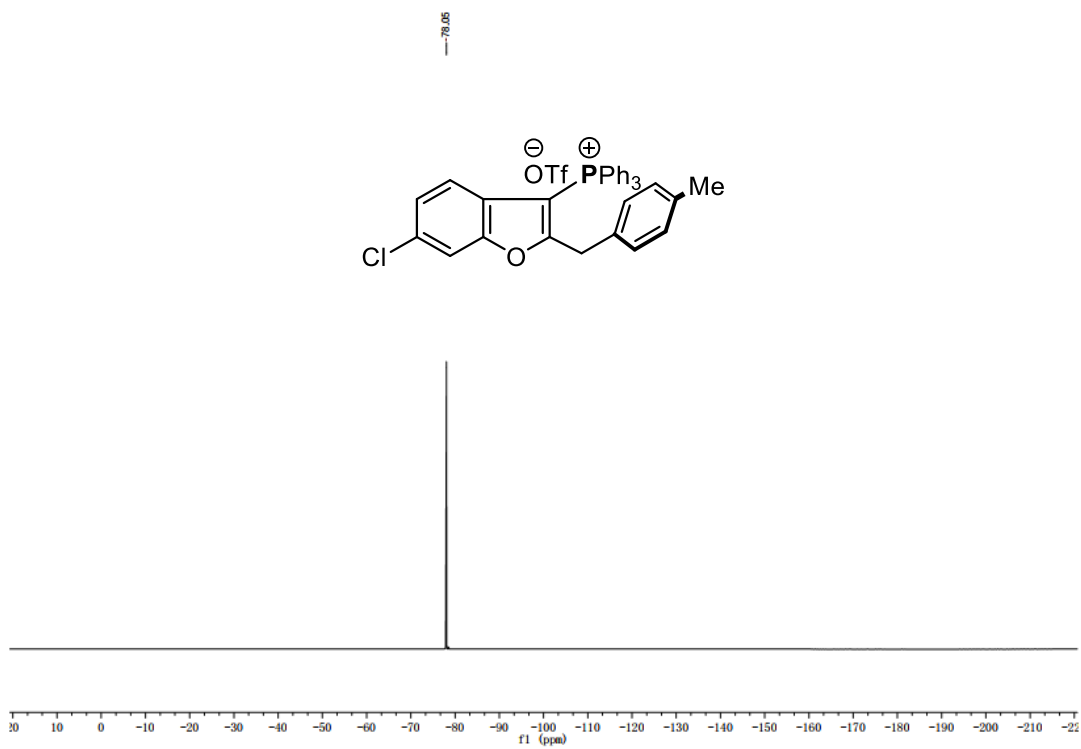





$^{13}\text{C}$  NMR (126 MHz,  $\text{CDCl}_3$ ) of compound **3ua**

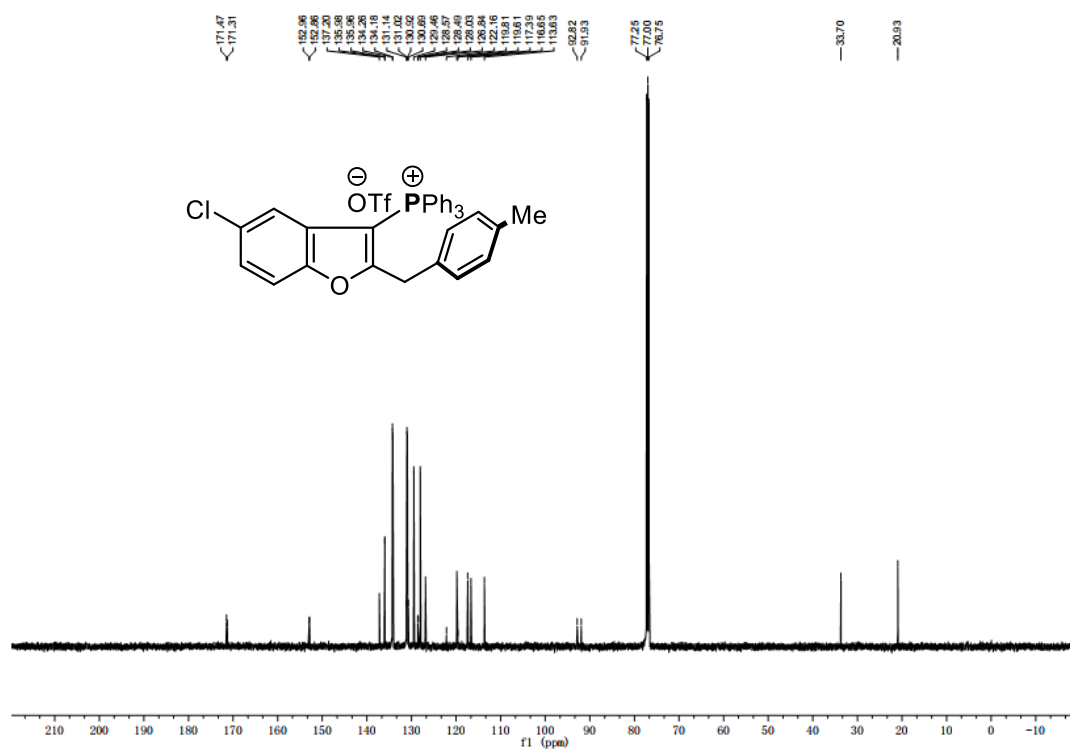

$^{19}\text{F}$  NMR (471 MHz,  $\text{CDCl}_3$ ) of compound **3ua**

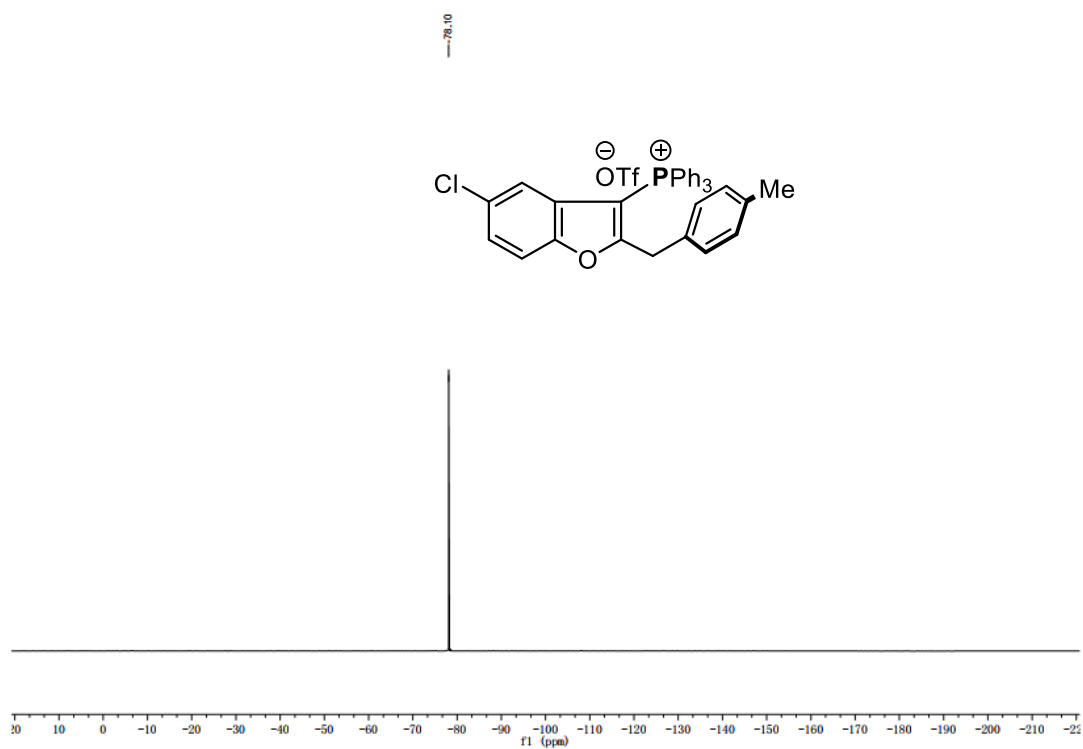







$^{13}\text{C}$  NMR (126 MHz,  $\text{CDCl}_3$ ) of compound **3wa**

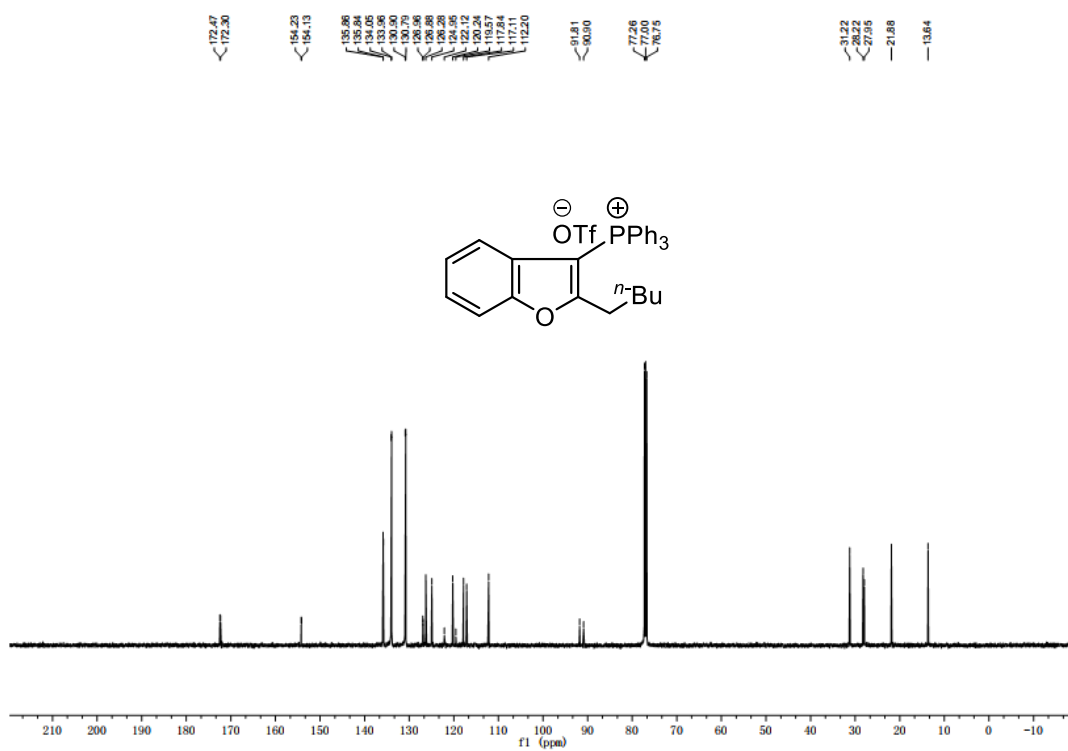

$^{19}\text{F}$  NMR (471 MHz,  $\text{CDCl}_3$ ) of compound **3wa**

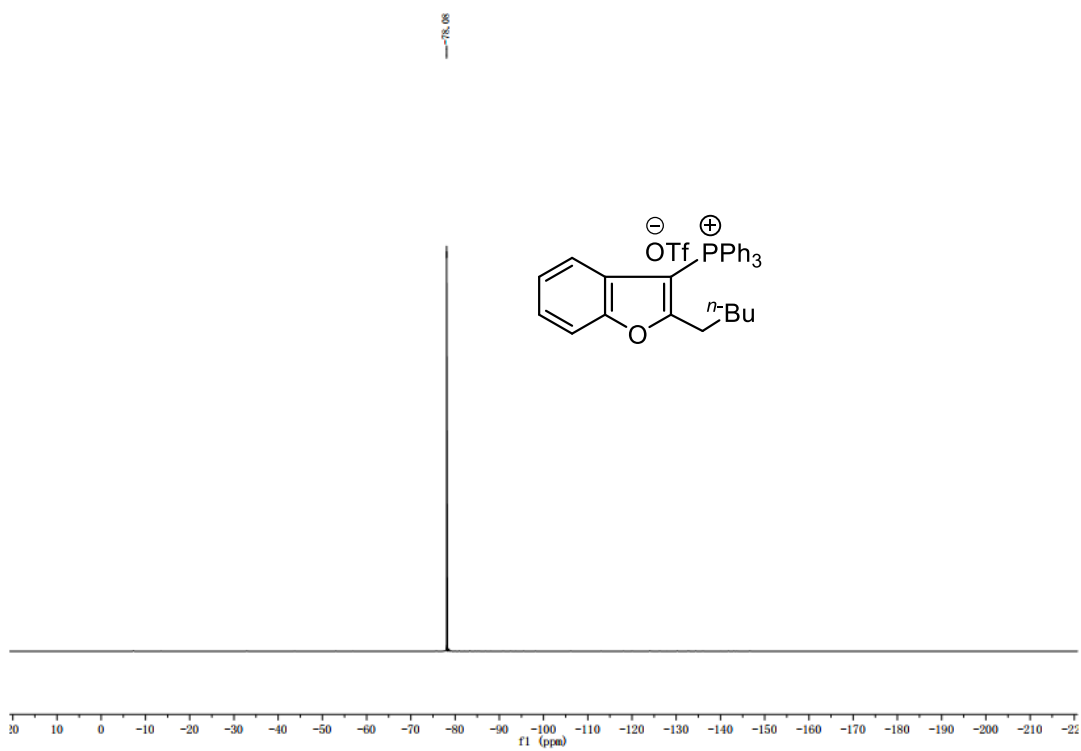

$^{31}\text{P}$  NMR (202 MHz,  $\text{CDCl}_3$ ) of compound **3wa**

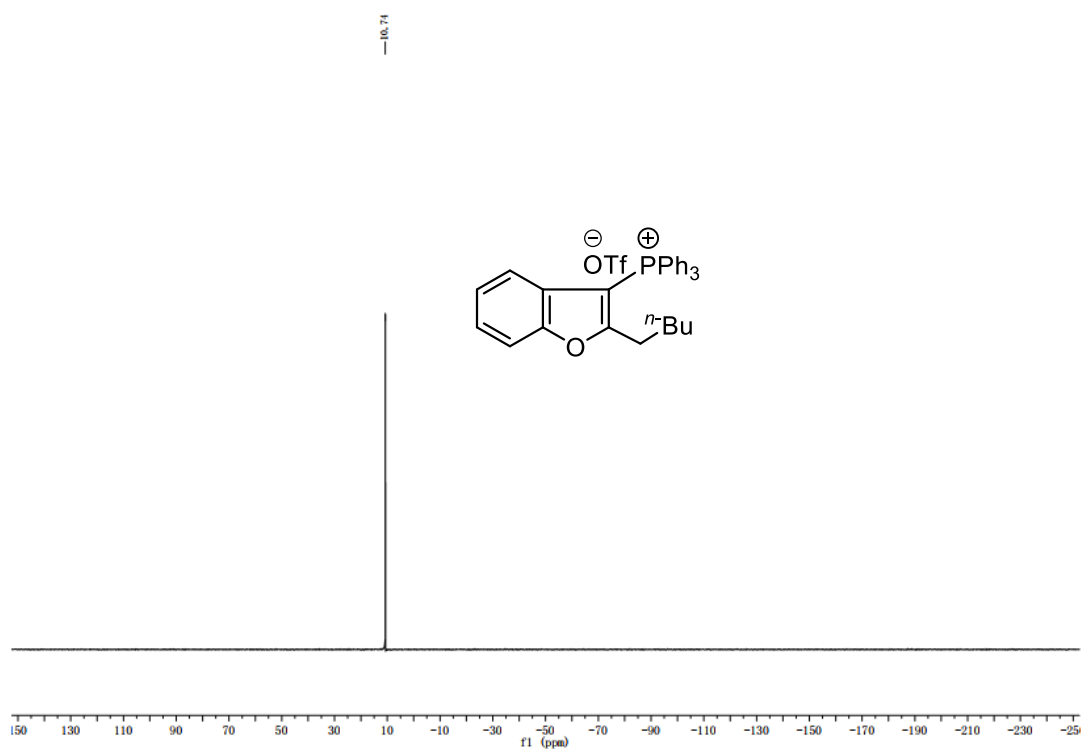

$^1\text{H}$  NMR (500 MHz,  $\text{CDCl}_3$ ) of compound **3xa**

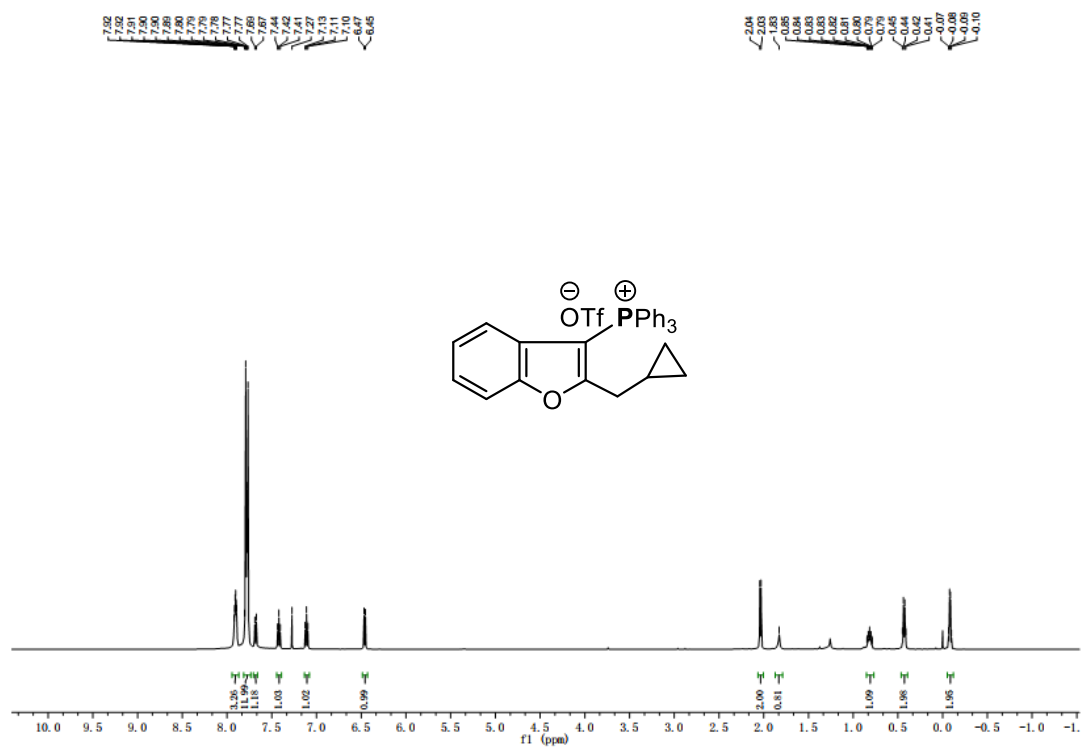

$^{13}\text{C}$  NMR (126 MHz,  $\text{CDCl}_3$ ) of compound **3xa**

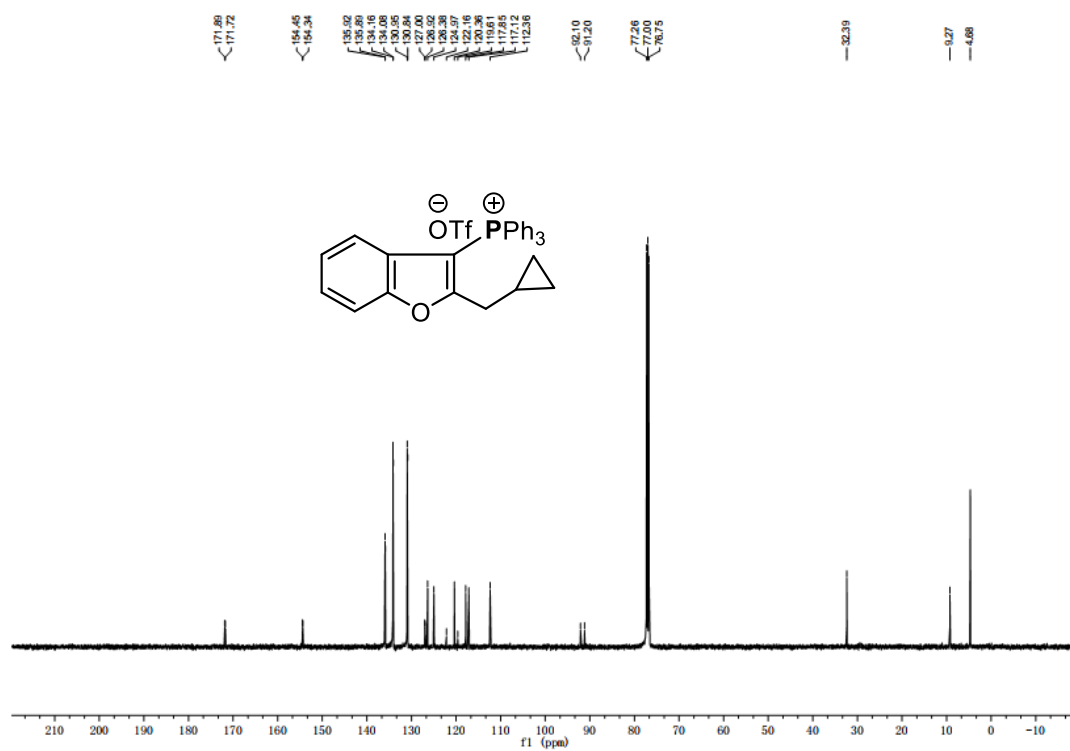

$^{19}\text{F}$  NMR (471 MHz,  $\text{CDCl}_3$ ) of compound **3xa**

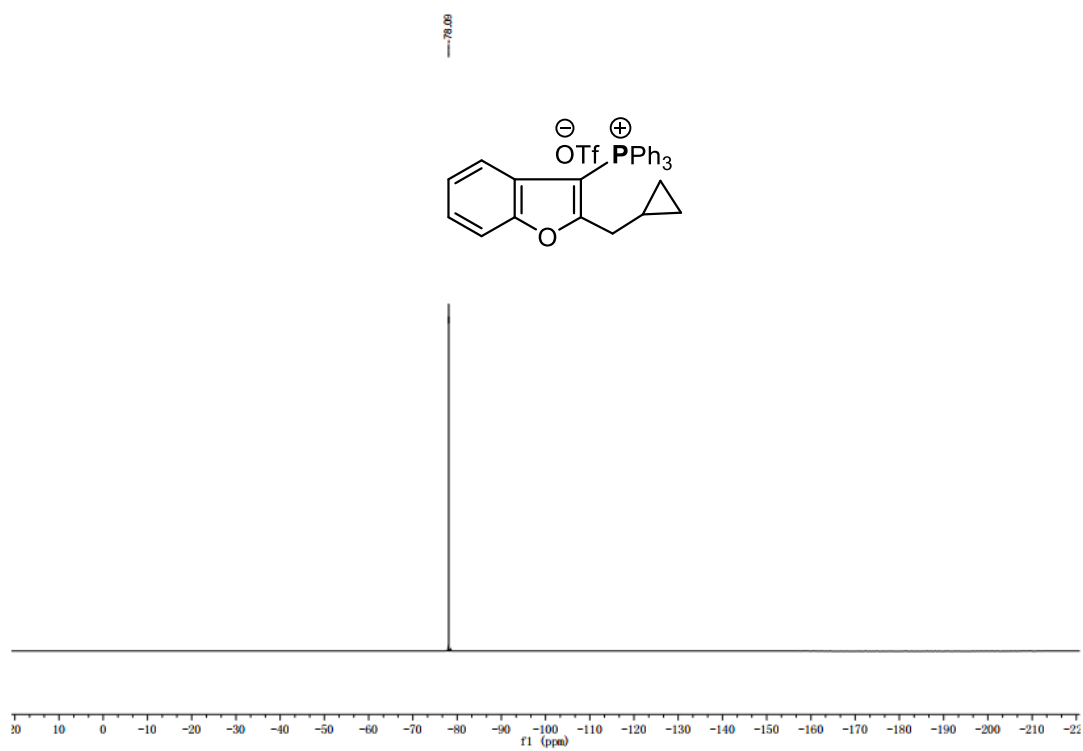



$^{31}\text{P}$  NMR (202 MHz,  $\text{CDCl}_3$ ) of compound **3xa**

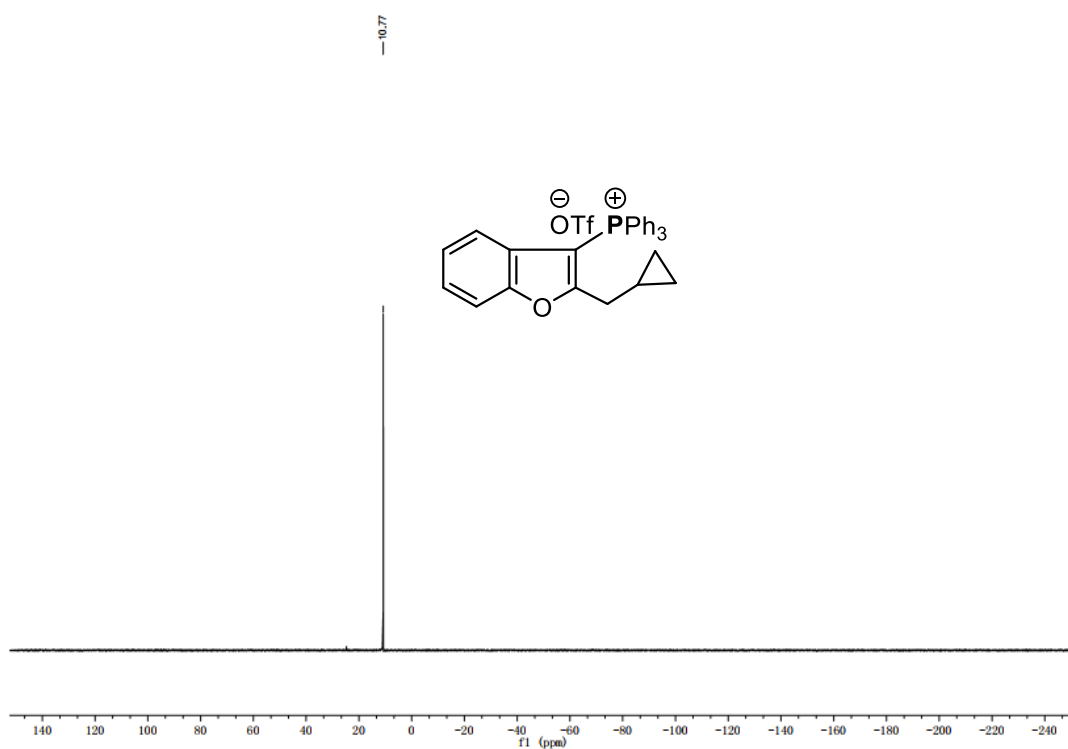

$^1\text{H}$  NMR (500 MHz,  $\text{CDCl}_3$ ) of compound **3ya**

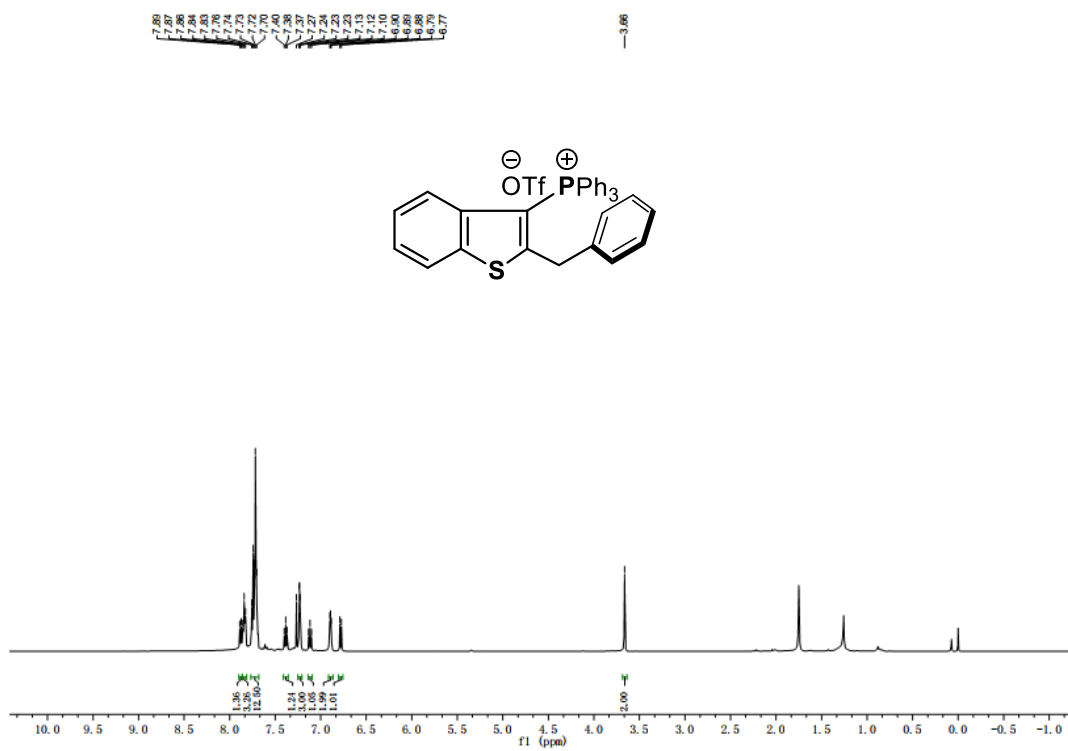

$^{13}\text{C}$  NMR (126 MHz,  $\text{CDCl}_3$ ) of compound **3ya**

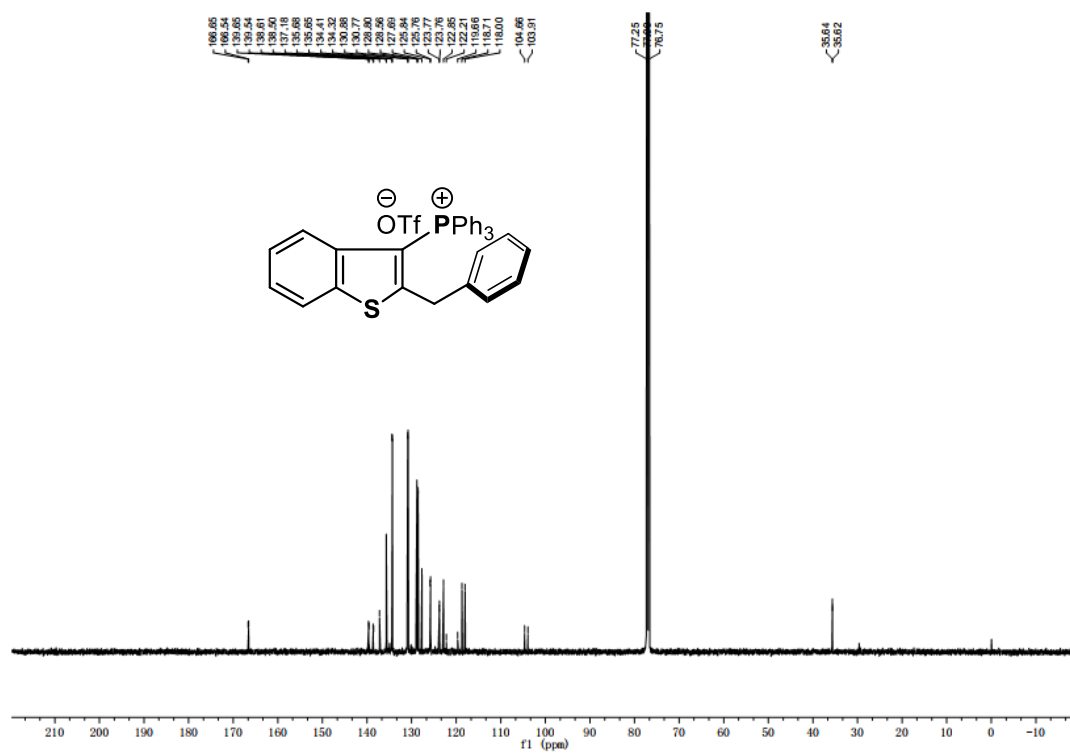

$^{19}\text{F}$  NMR (471 MHz,  $\text{CDCl}_3$ ) of compound **3ya**

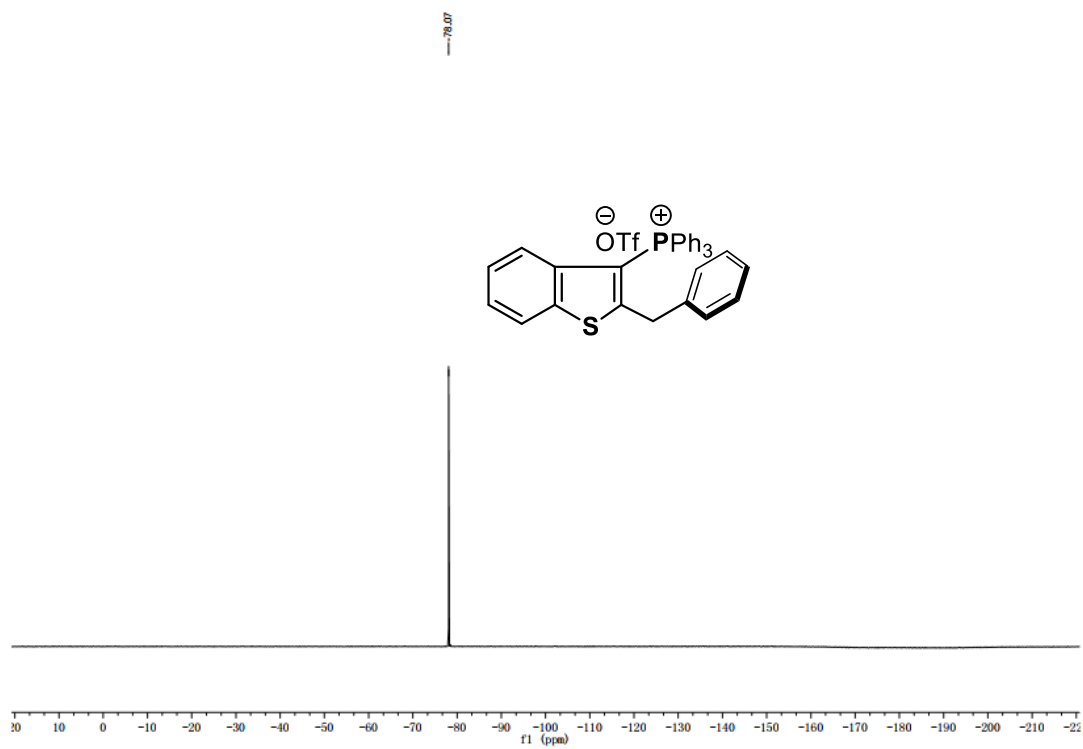

$^{31}\text{P}$  NMR (202 MHz,  $\text{CDCl}_3$ ) of compound **3ya**

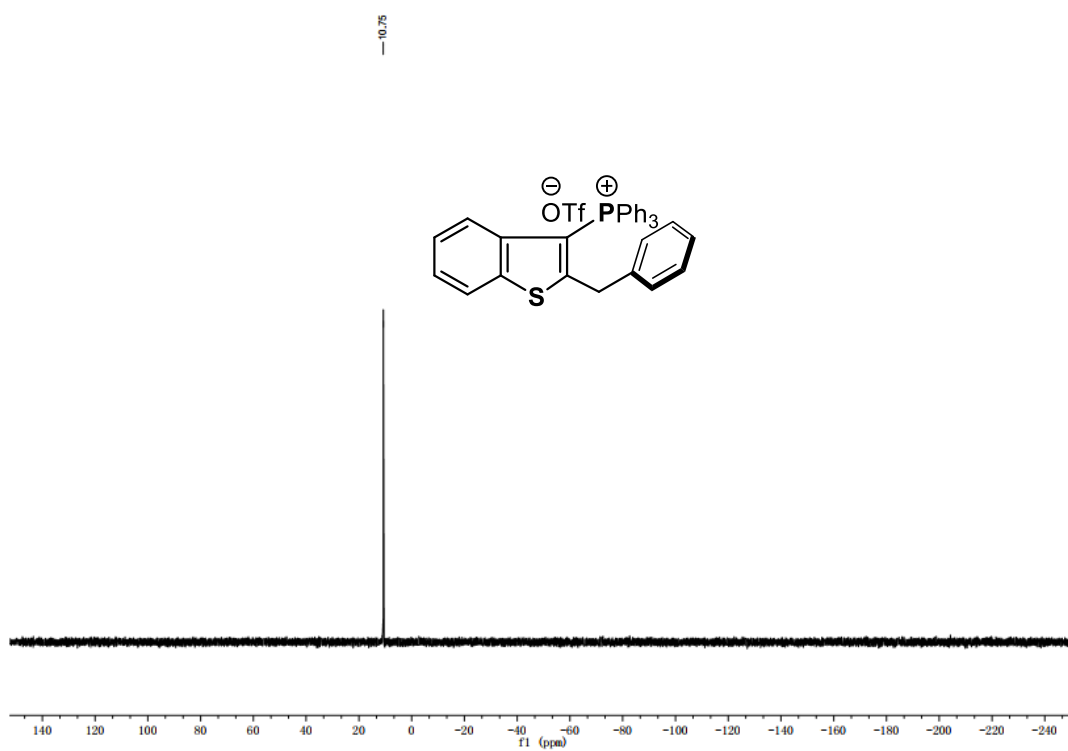

$^1\text{H}$  NMR (500 MHz,  $\text{CDCl}_3$ ) of compound **3za**

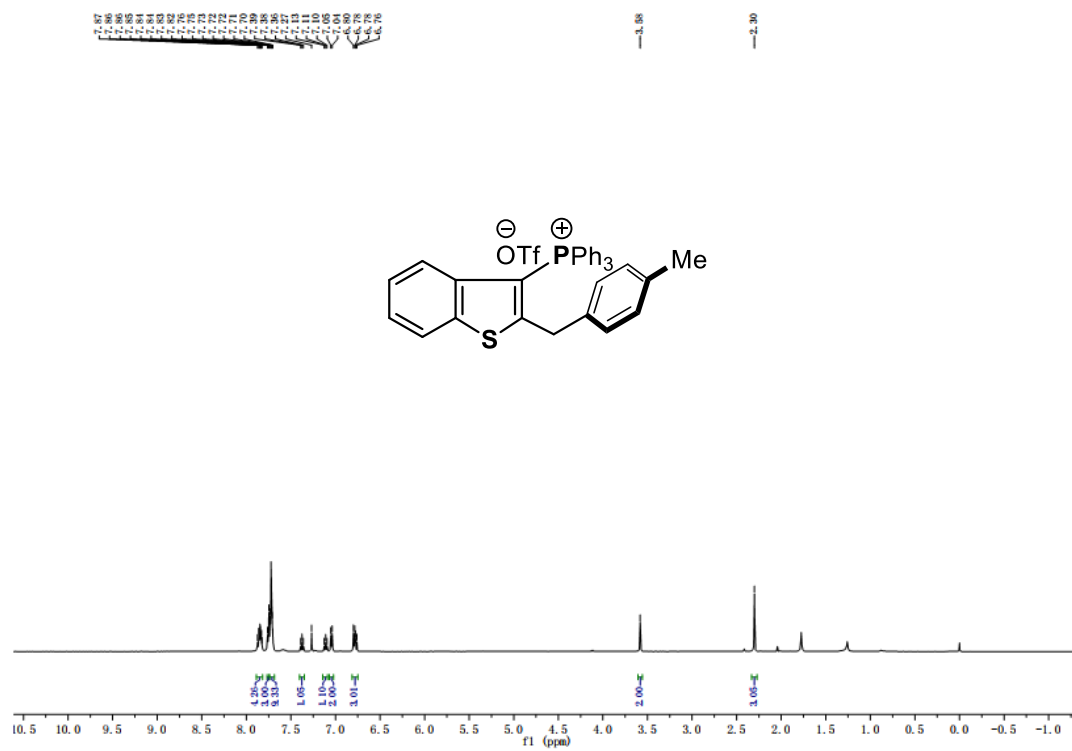

$^{13}\text{C}$  NMR (126 MHz,  $\text{CDCl}_3$ ) of compound **3za**

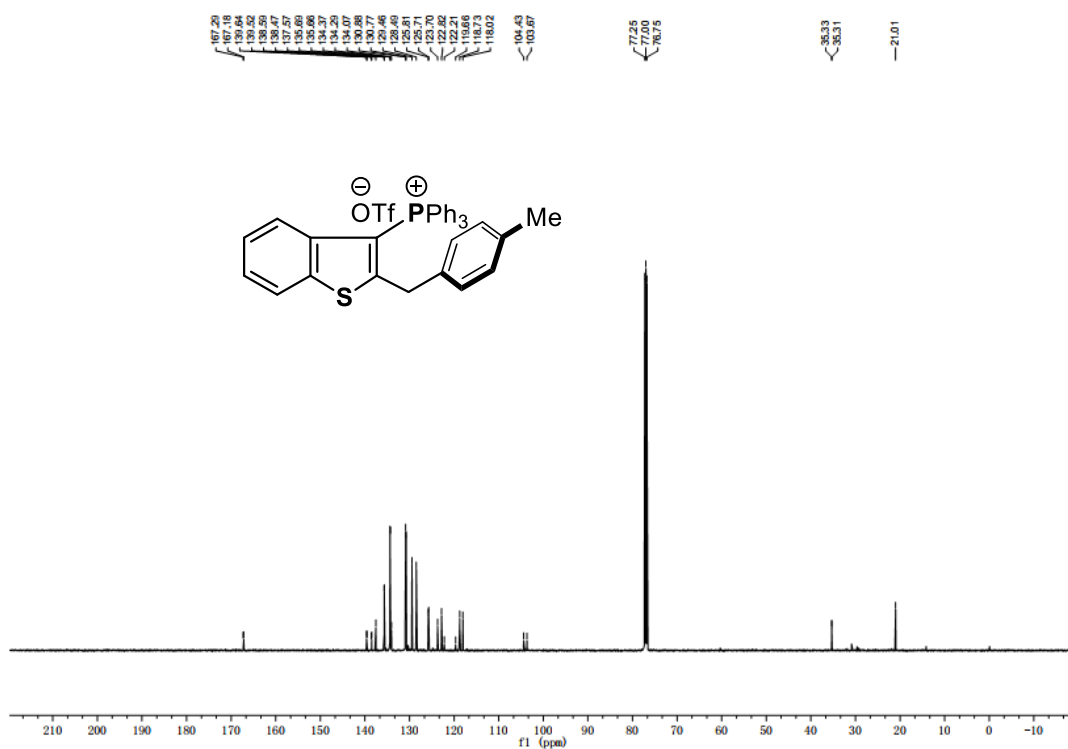

$^{19}\text{F}$  NMR (471 MHz,  $\text{CDCl}_3$ ) of compound **3za**

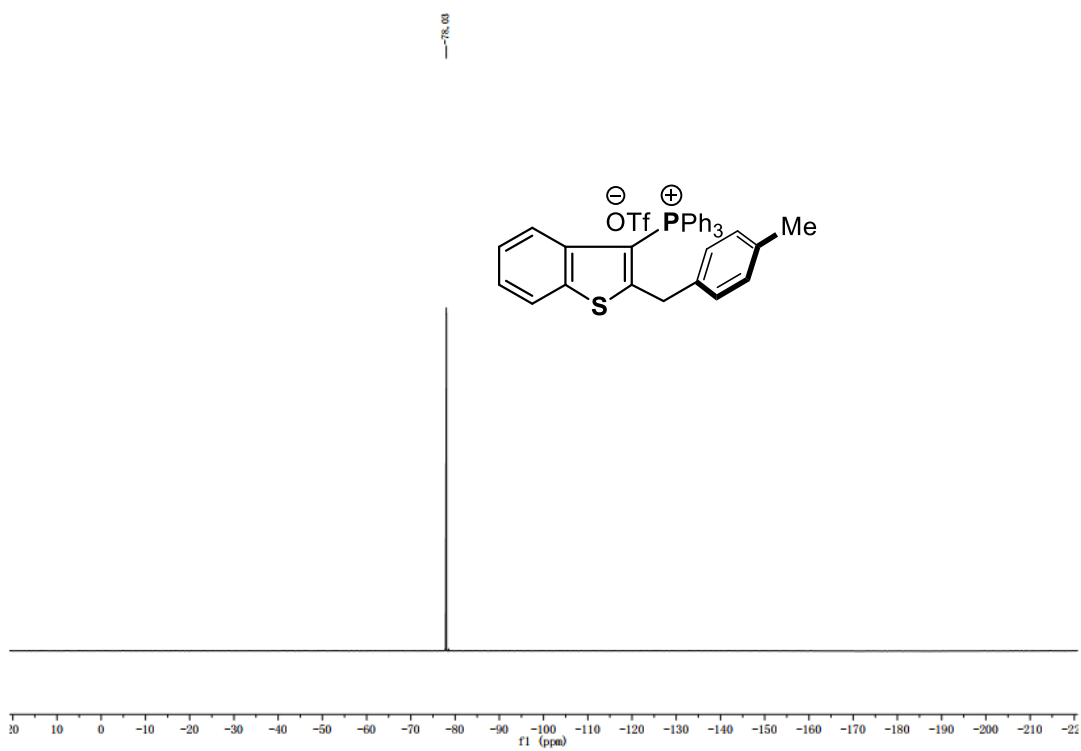

$^{31}\text{P}$  NMR (202 MHz,  $\text{CDCl}_3$ ) of compound **3za**

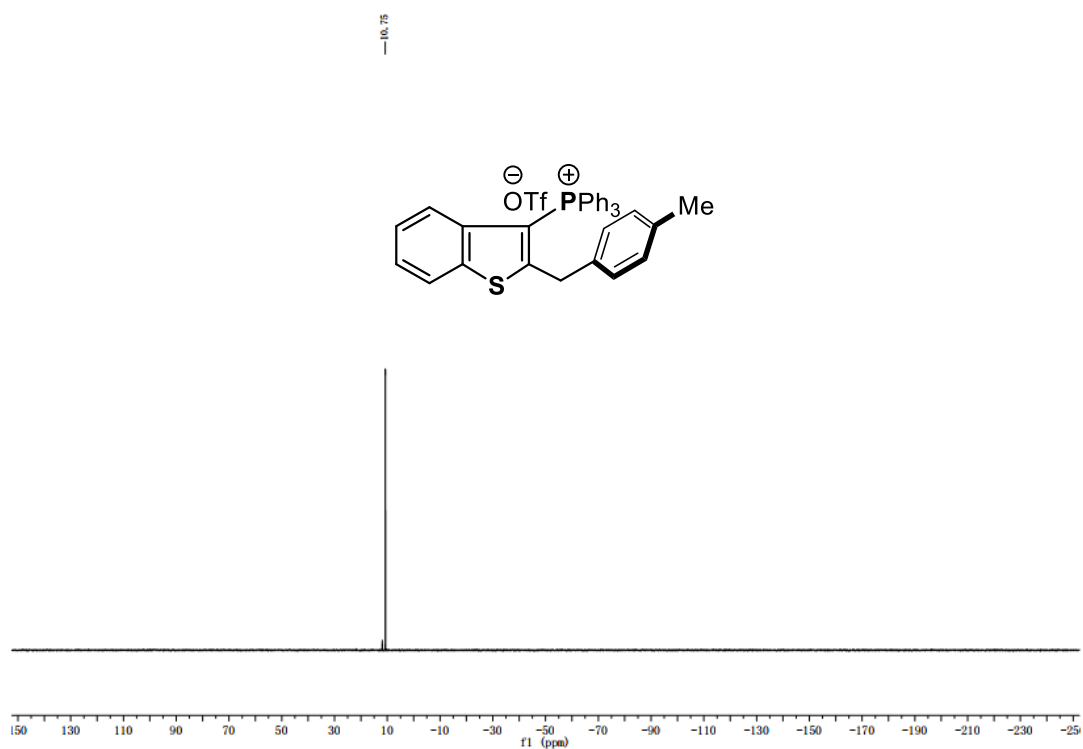

$^1\text{H}$  NMR (500 MHz,  $\text{CDCl}_3$ ) of compound **3ab**

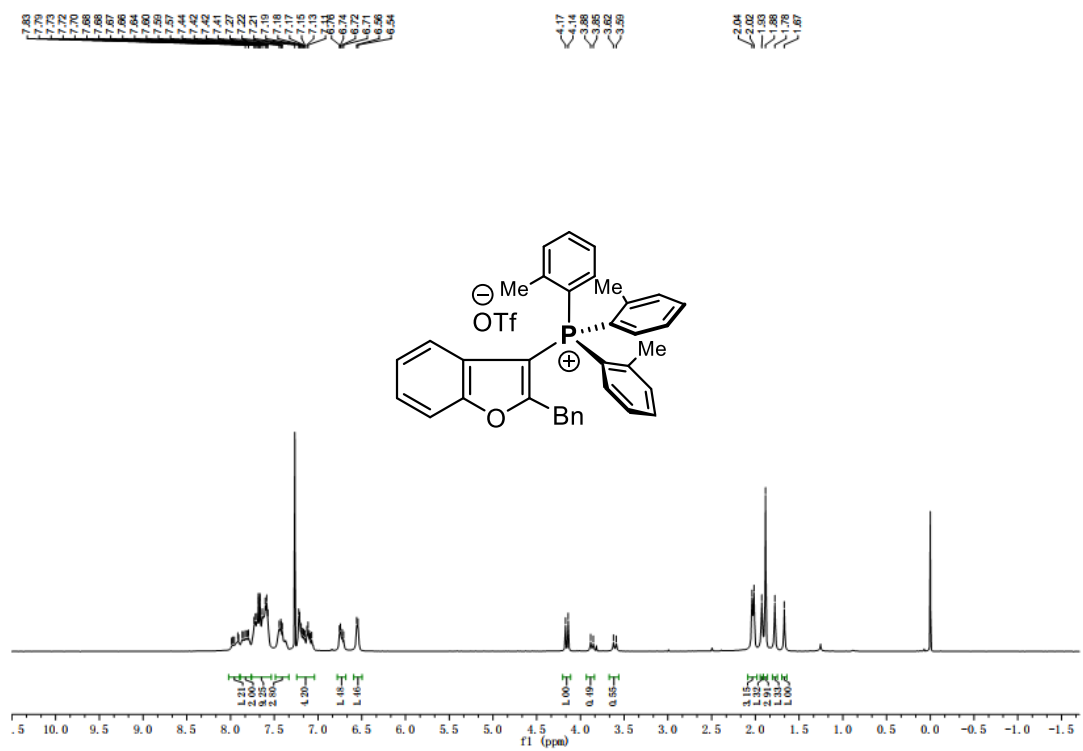

$^{13}\text{C}$  NMR (126 MHz,  $\text{CDCl}_3$ ) of compound **3ab**

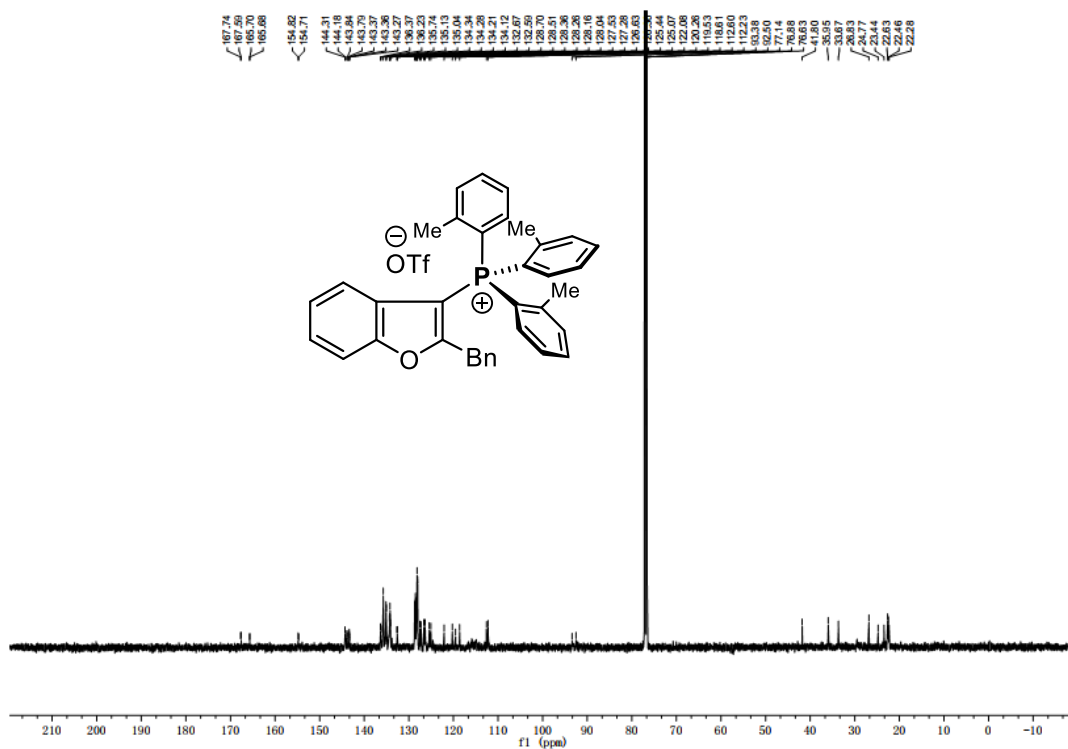

$^{19}\text{F}$  NMR (471 MHz,  $\text{CDCl}_3$ ) of compound **3ab**

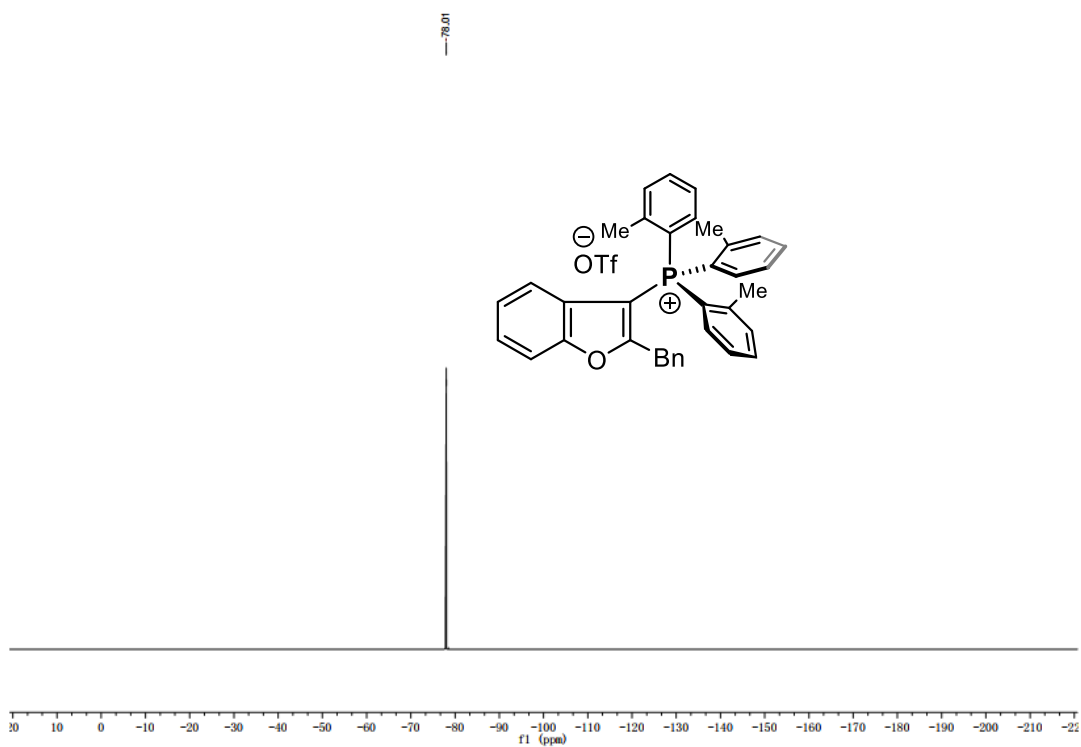

$^{31}\text{P}$  NMR (202 MHz,  $\text{CDCl}_3$ ) of compound **3ab**

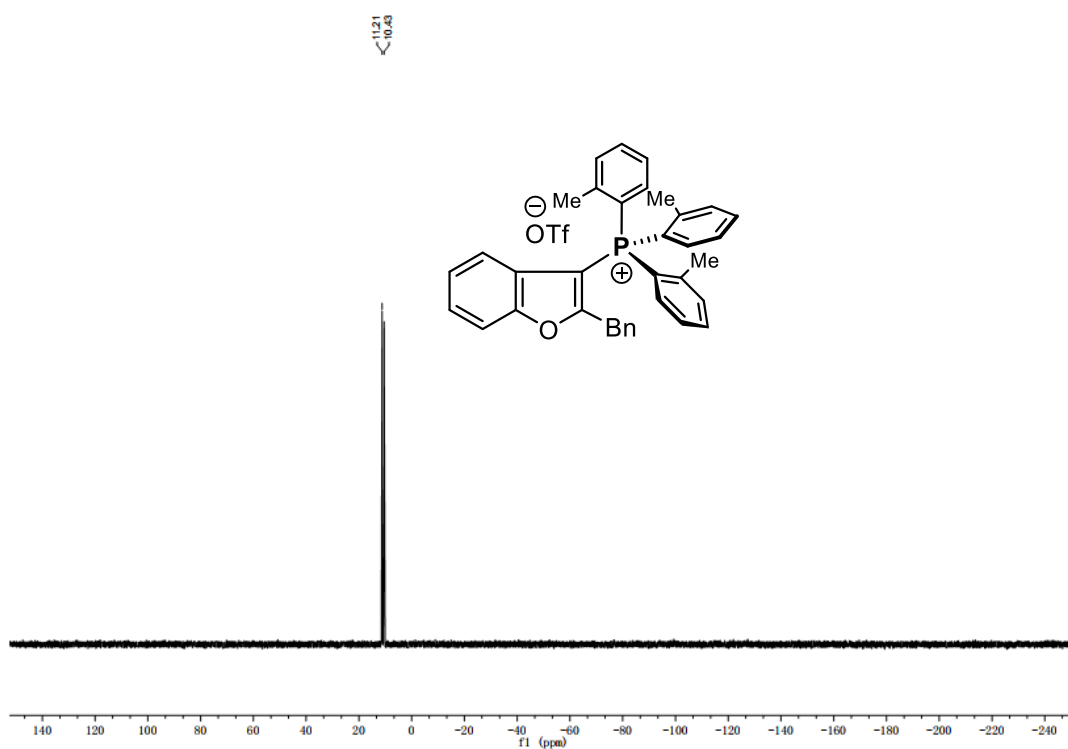

$^1\text{H}$  NMR (500 MHz,  $\text{CDCl}_3$ ) of compound **3ac**

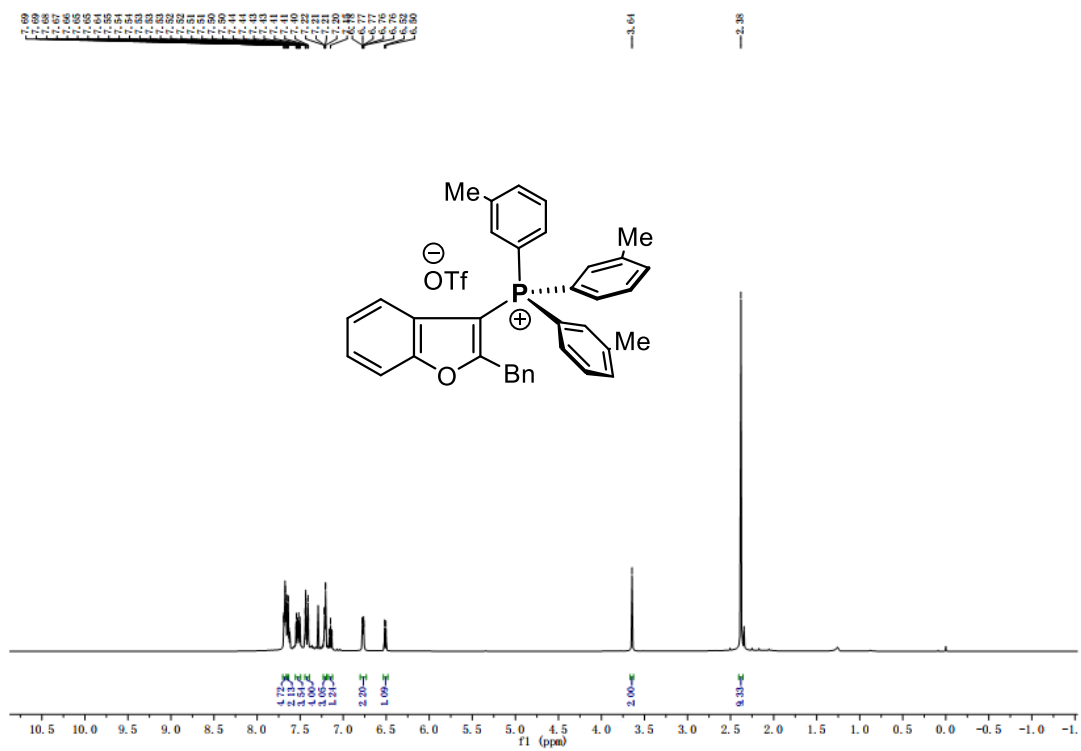

$^{13}\text{C}$  NMR (126 MHz,  $\text{CDCl}_3$ ) of compound **3ac**

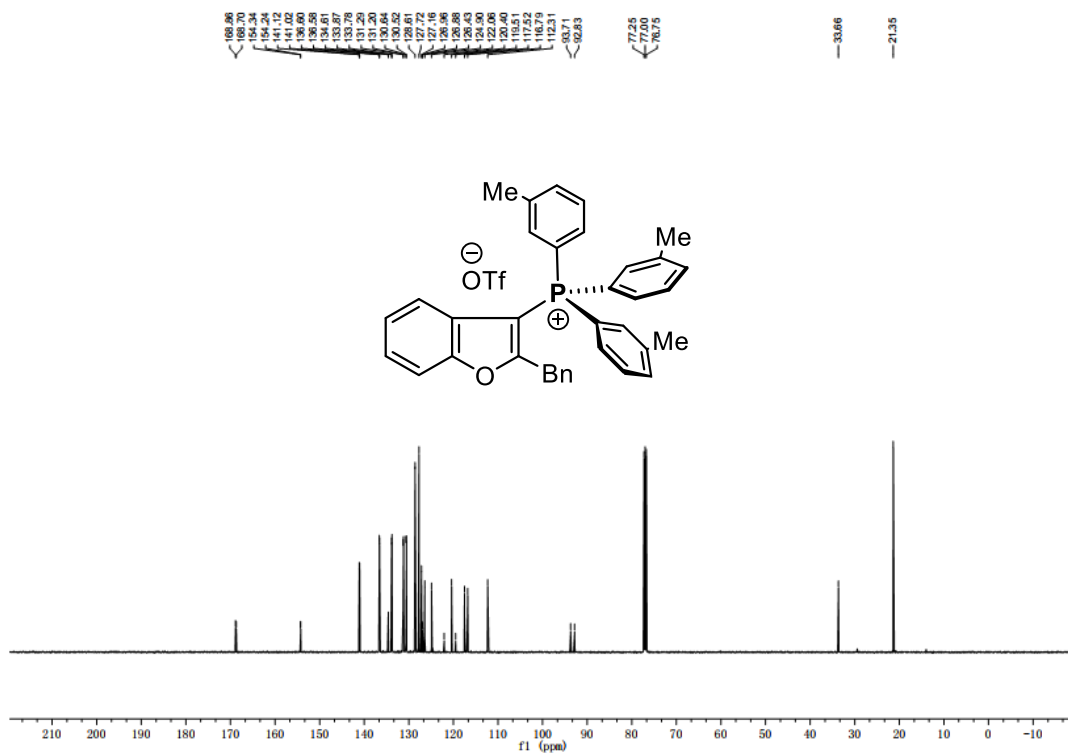

$^{19}\text{F}$  NMR (471 MHz,  $\text{CDCl}_3$ ) of compound **3ac**

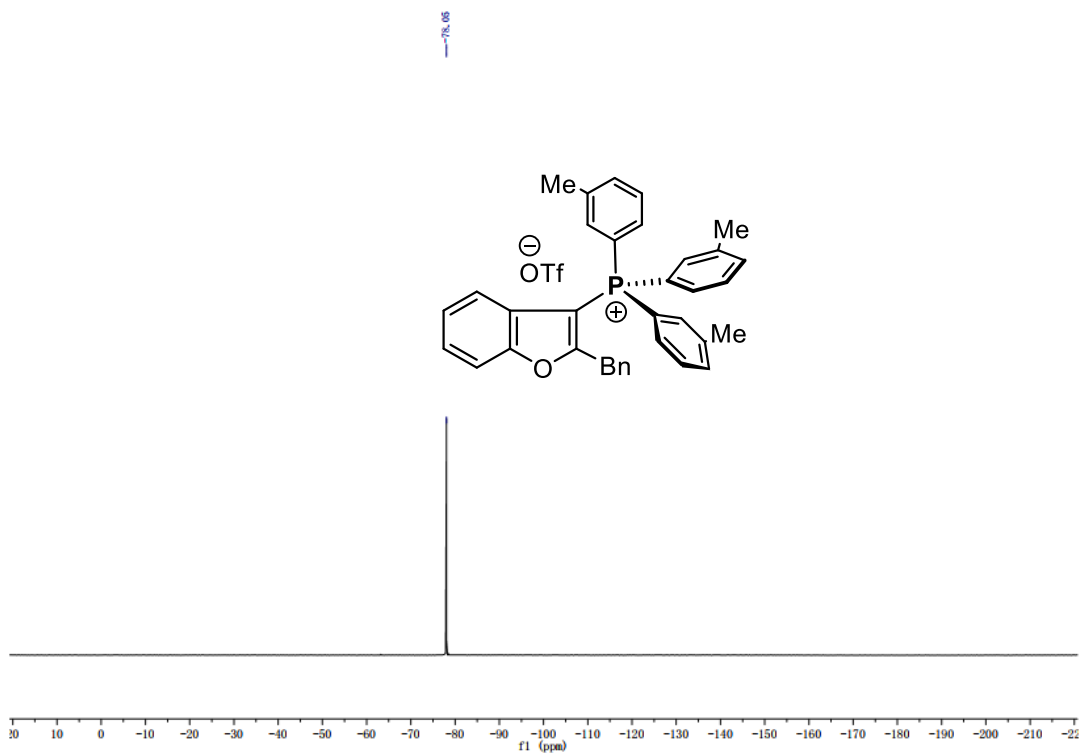



$^{31}\text{P}$  NMR (202 MHz,  $\text{CDCl}_3$ ) of compound **3ac**

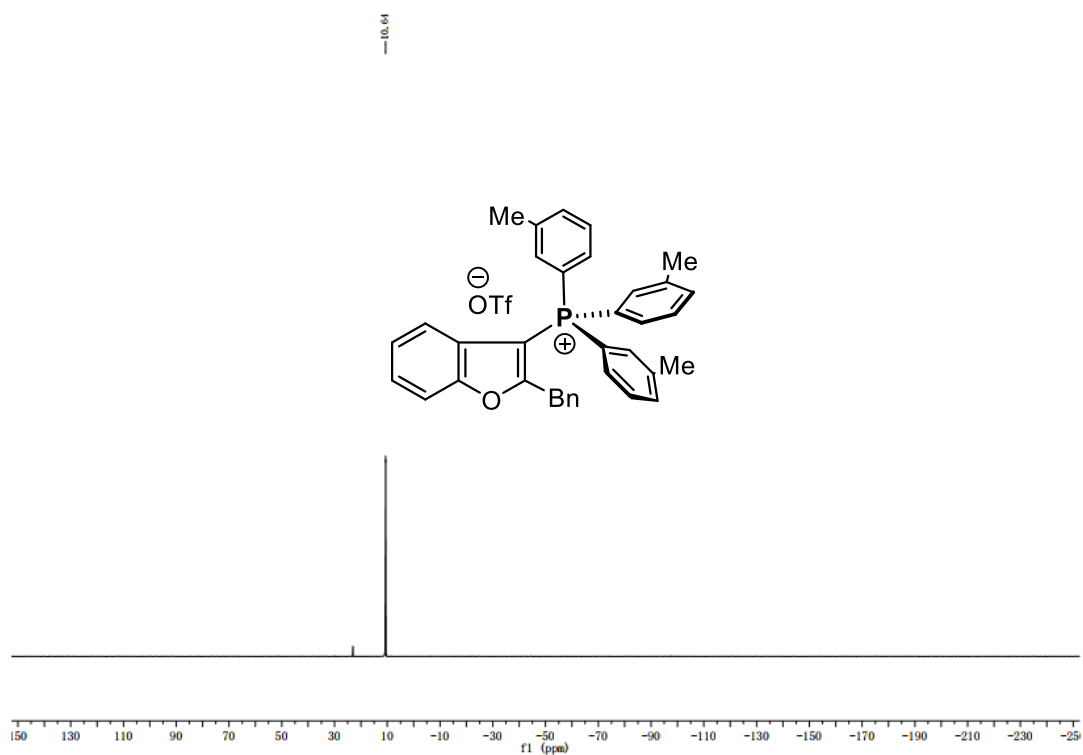

$^1\text{H}$  NMR (500 MHz,  $\text{CDCl}_3$ ) of compound **3ad**

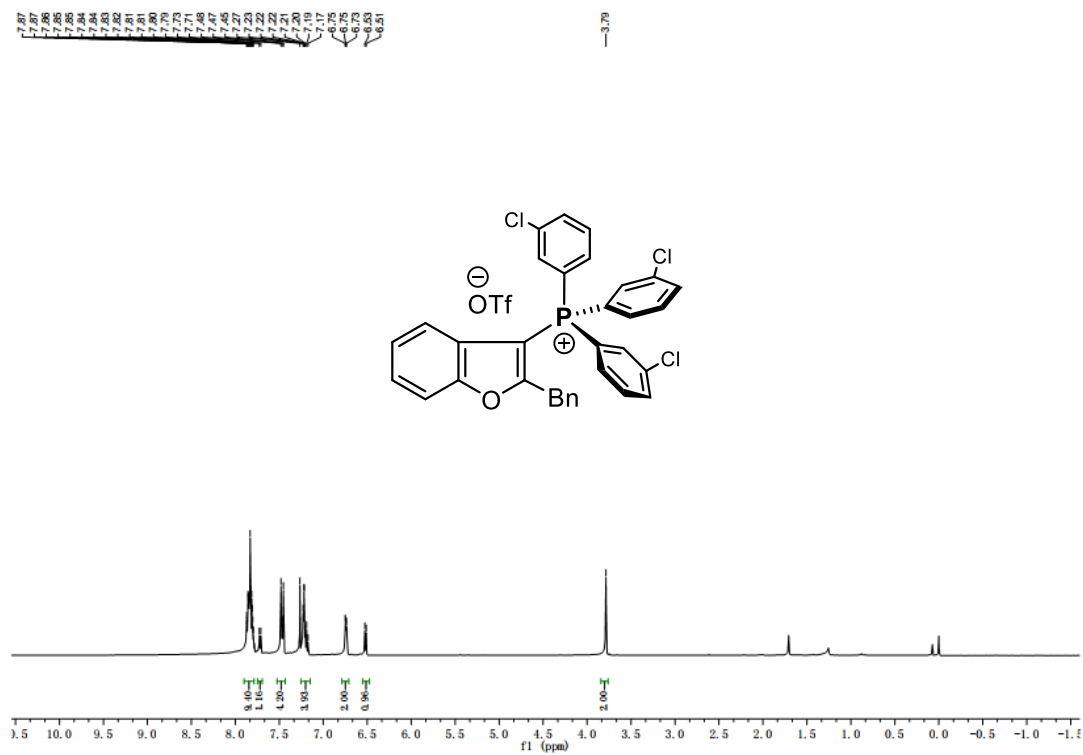

$^{13}\text{C}$  NMR (126 MHz,  $\text{CDCl}_3$ ) of compound **3ad**

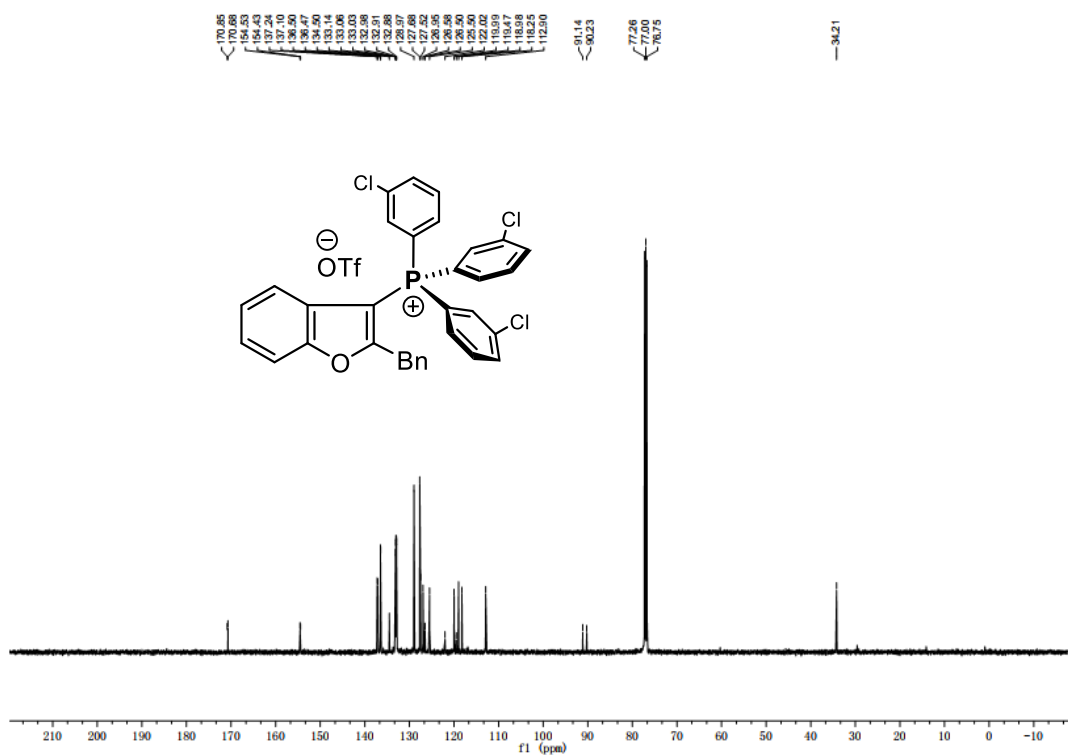

$^{19}\text{F}$  NMR (471 MHz,  $\text{CDCl}_3$ ) of compound **3ad**

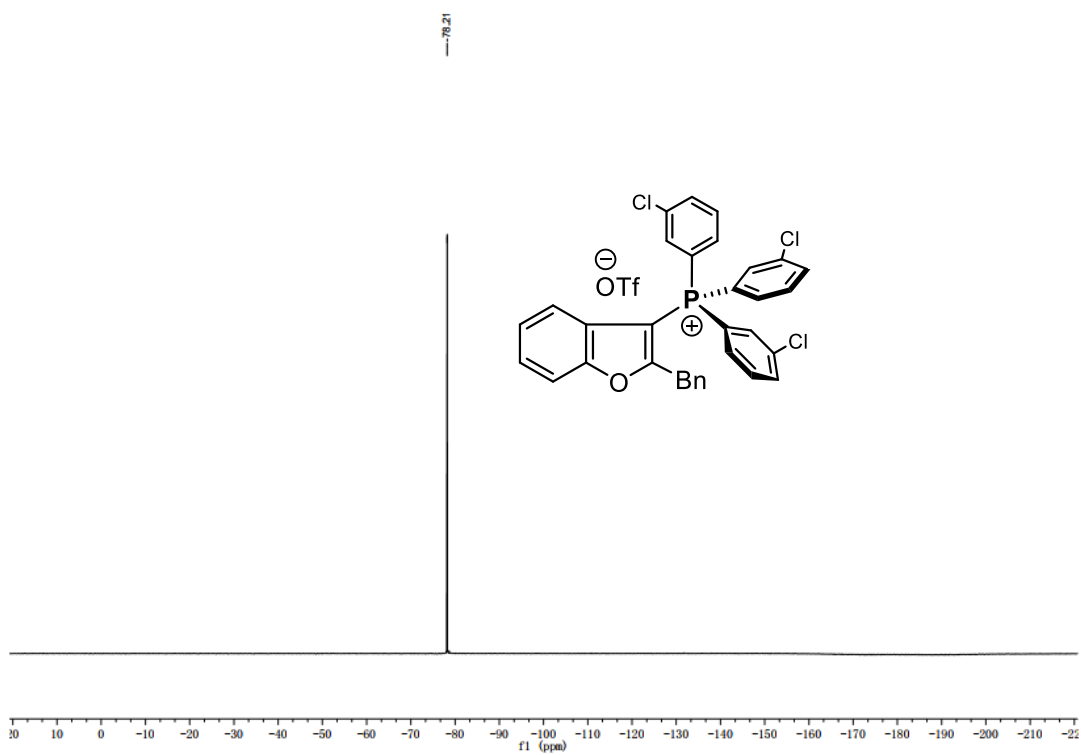

$^{31}\text{P}$  NMR (202 MHz,  $\text{CDCl}_3$ ) of compound **3ad**

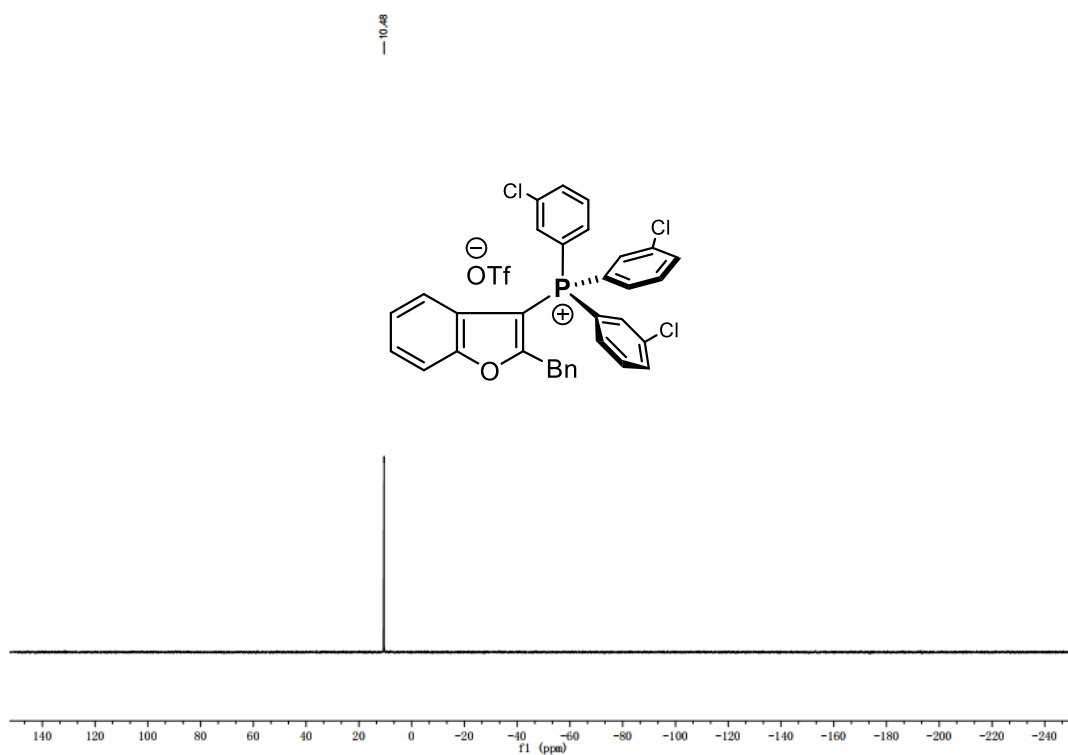

$^1\text{H}$  NMR (500 MHz,  $\text{CDCl}_3$ ) of compound **3ae**

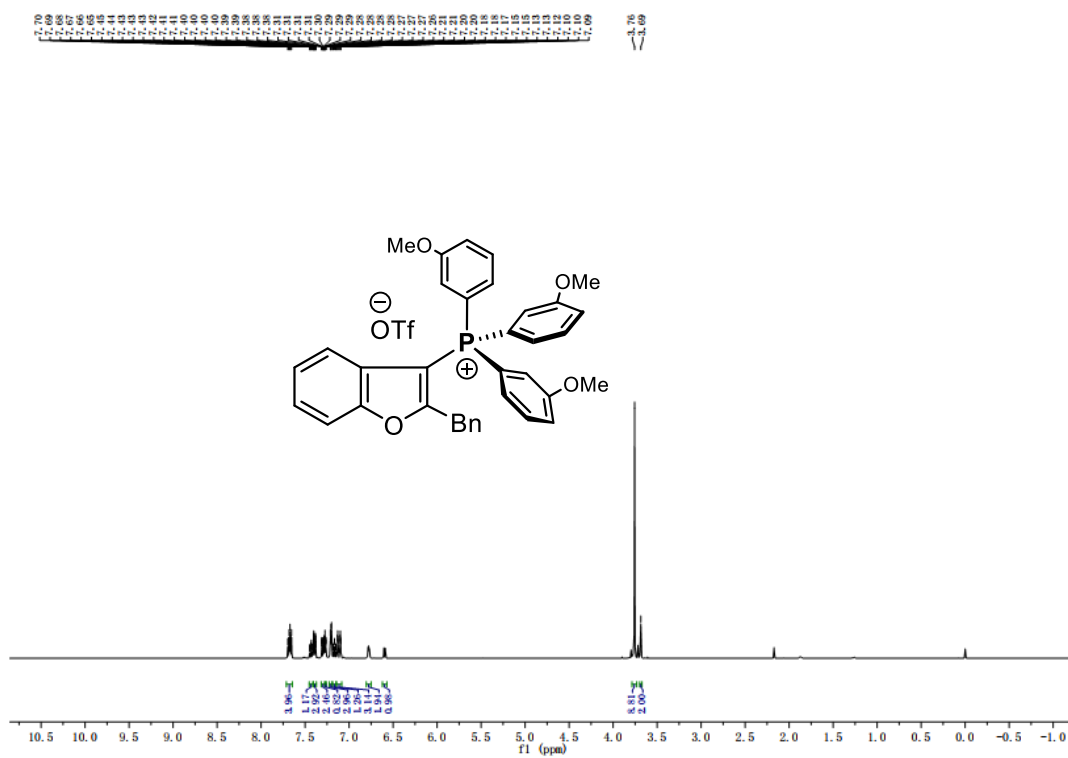



$^{31}\text{P}$  NMR (202 MHz,  $\text{CDCl}_3$ ) of compound **3ae**

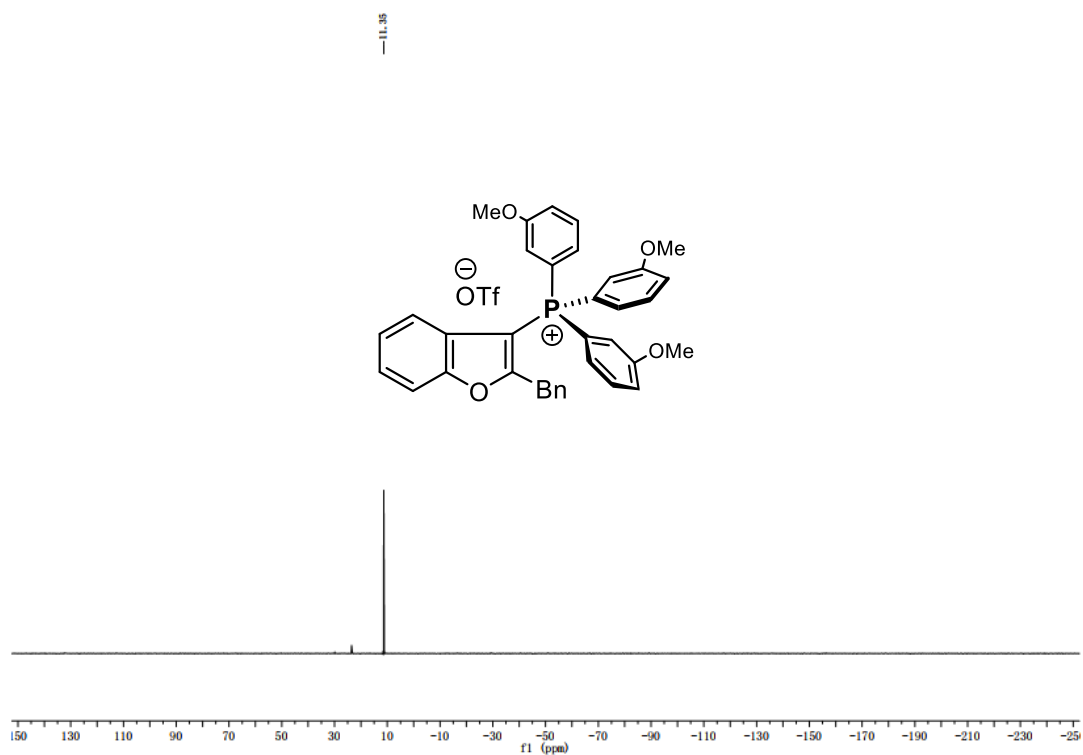

$^1\text{H}$  NMR (500 MHz,  $\text{CDCl}_3$ ) of compound **3af**

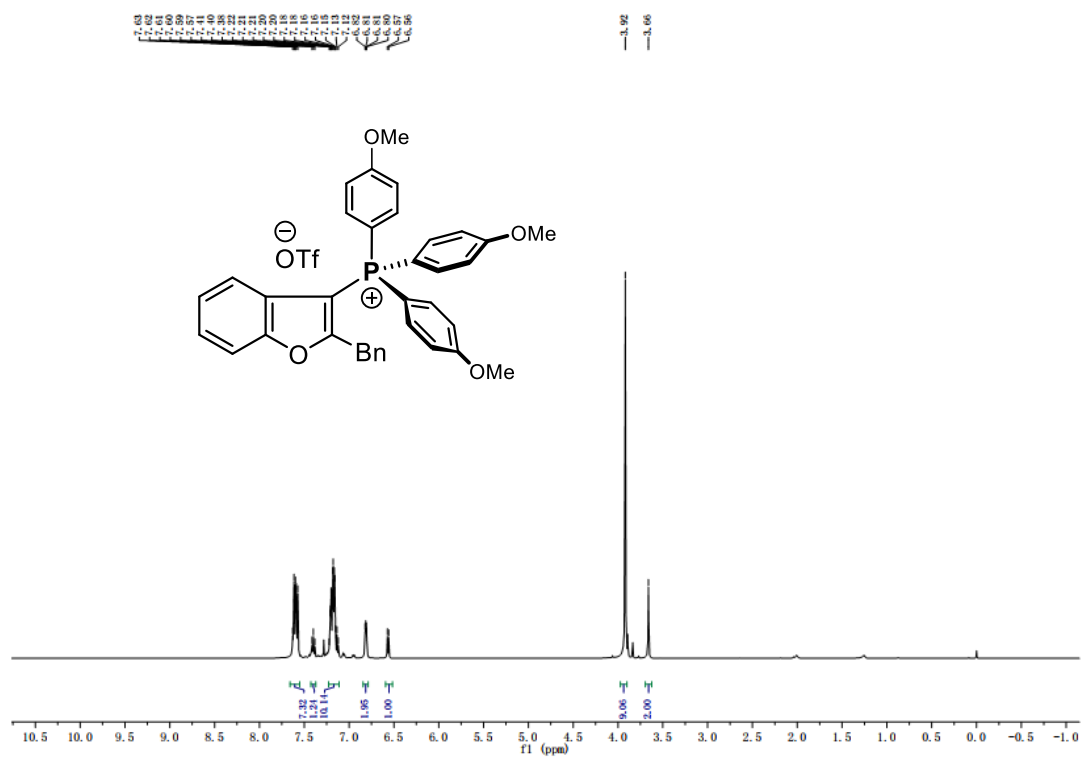

$^{13}\text{C}$  NMR (126 MHz,  $\text{CDCl}_3$ ) of compound **3af**

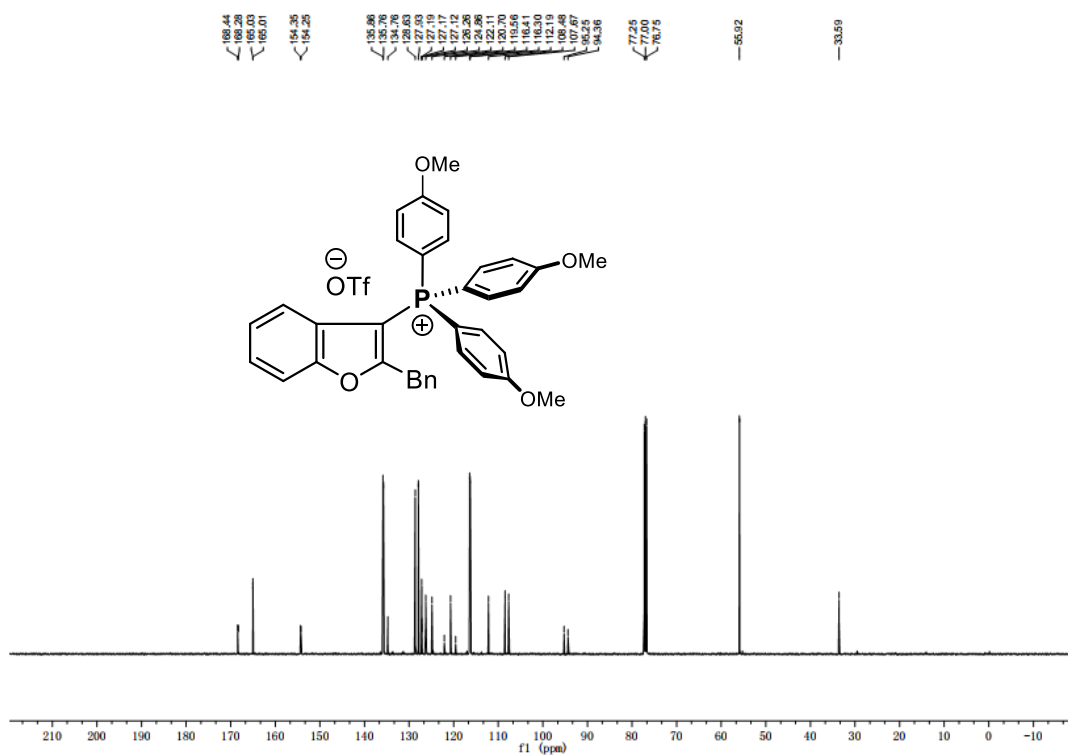

$^{19}\text{F}$  NMR (471 MHz,  $\text{CDCl}_3$ ) of compound **3af**

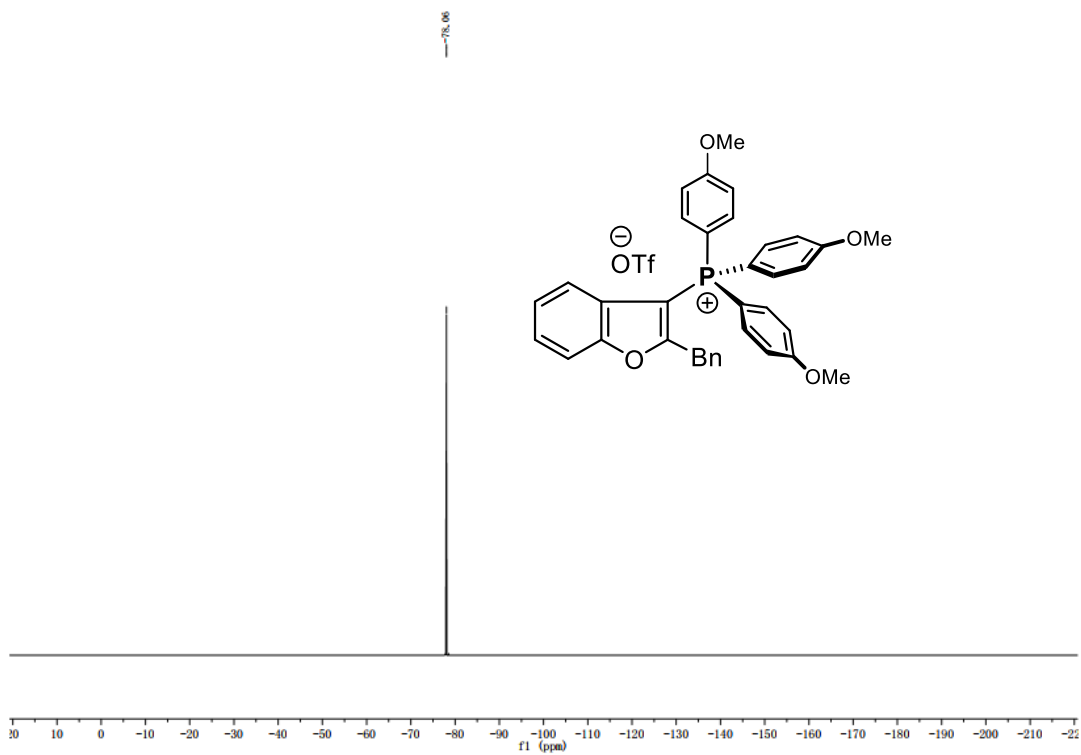



$^{13}\text{C}$  NMR (126 MHz,  $\text{CDCl}_3$ ) of compound **3ag**

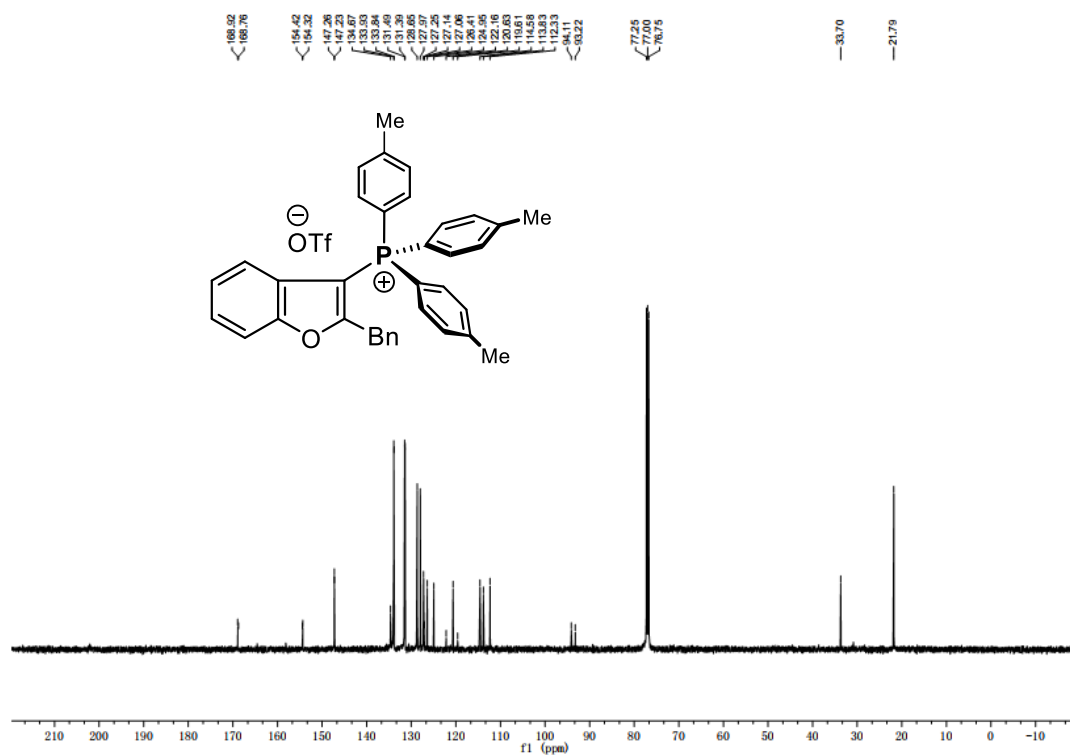

$^{19}\text{F}$  NMR (471 MHz,  $\text{CDCl}_3$ ) of compound **3ag**

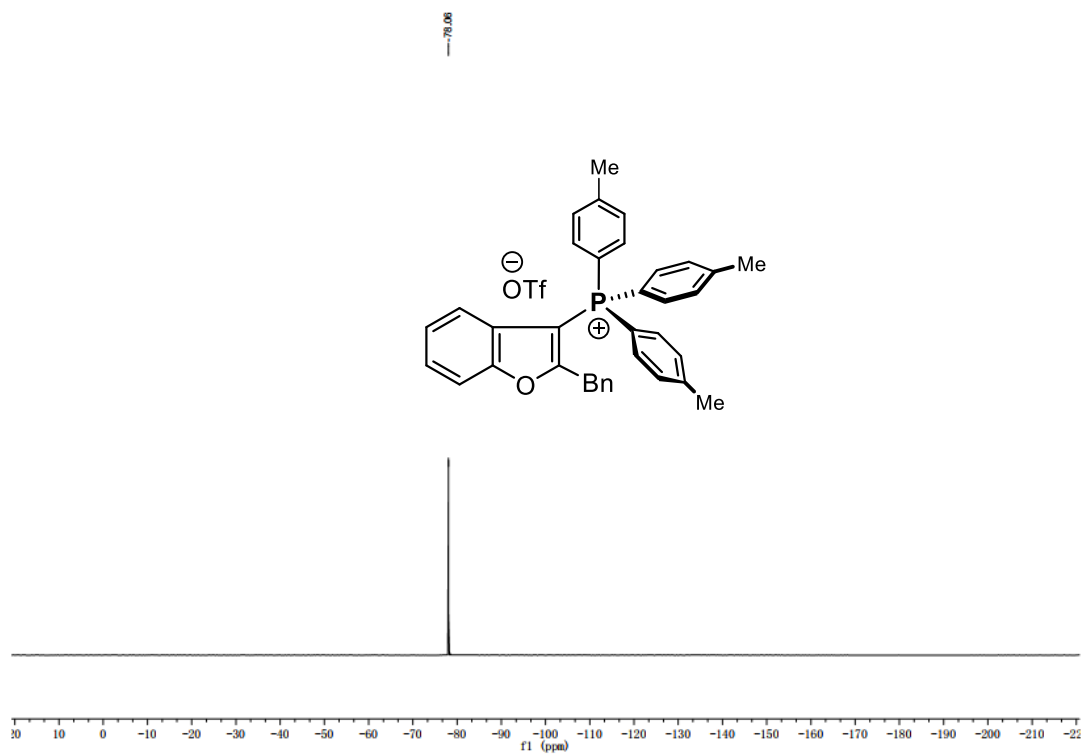



$^{31}\text{P}$  NMR (202 MHz,  $\text{CDCl}_3$ ) of compound **3ag**

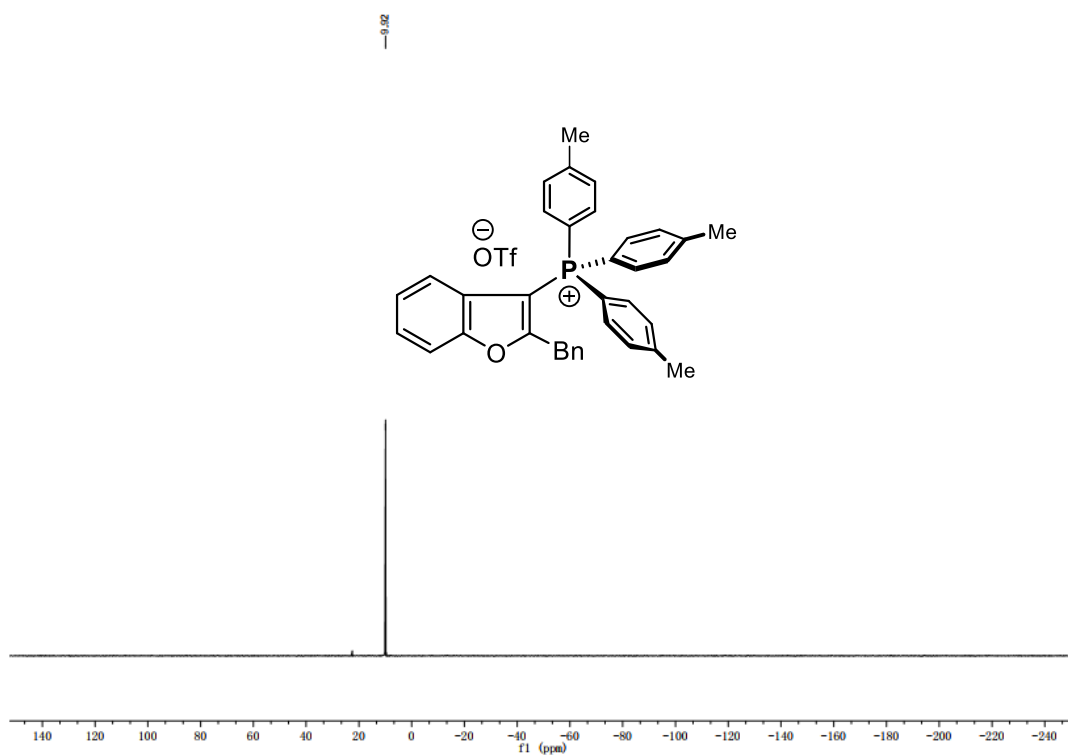

$^1\text{H}$  NMR (500 MHz,  $\text{CDCl}_3$ ) of compound **3ah**

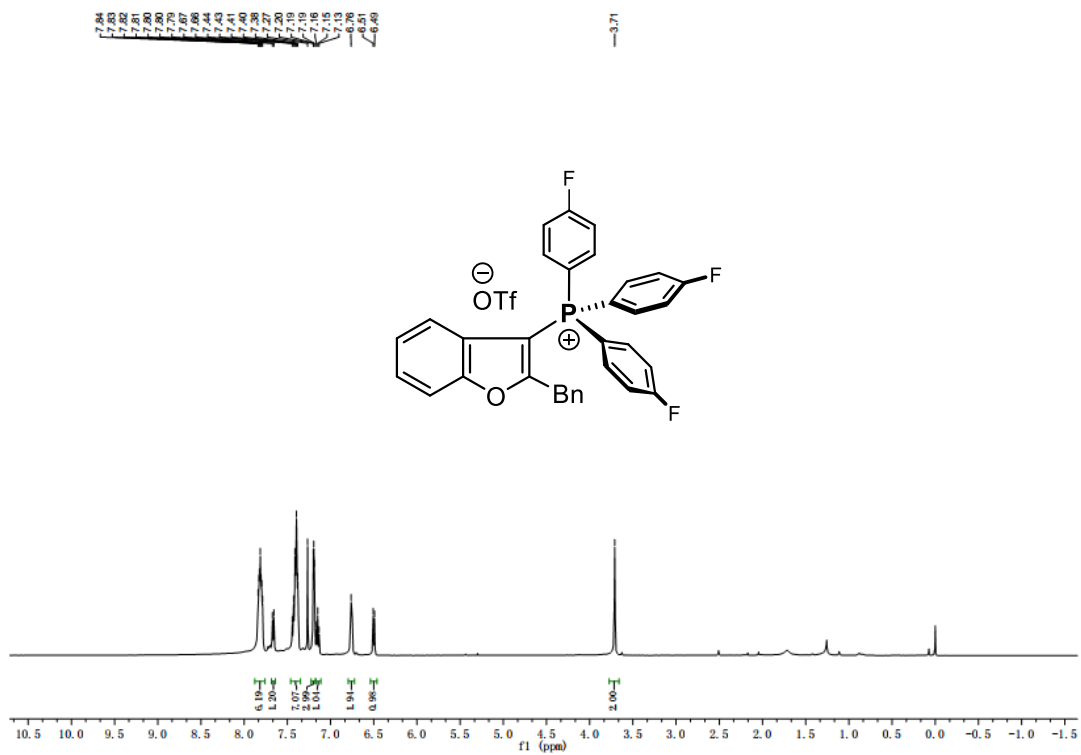

$^{13}\text{C}$  NMR (126 MHz,  $\text{CDCl}_3$ ) of compound **3ah**

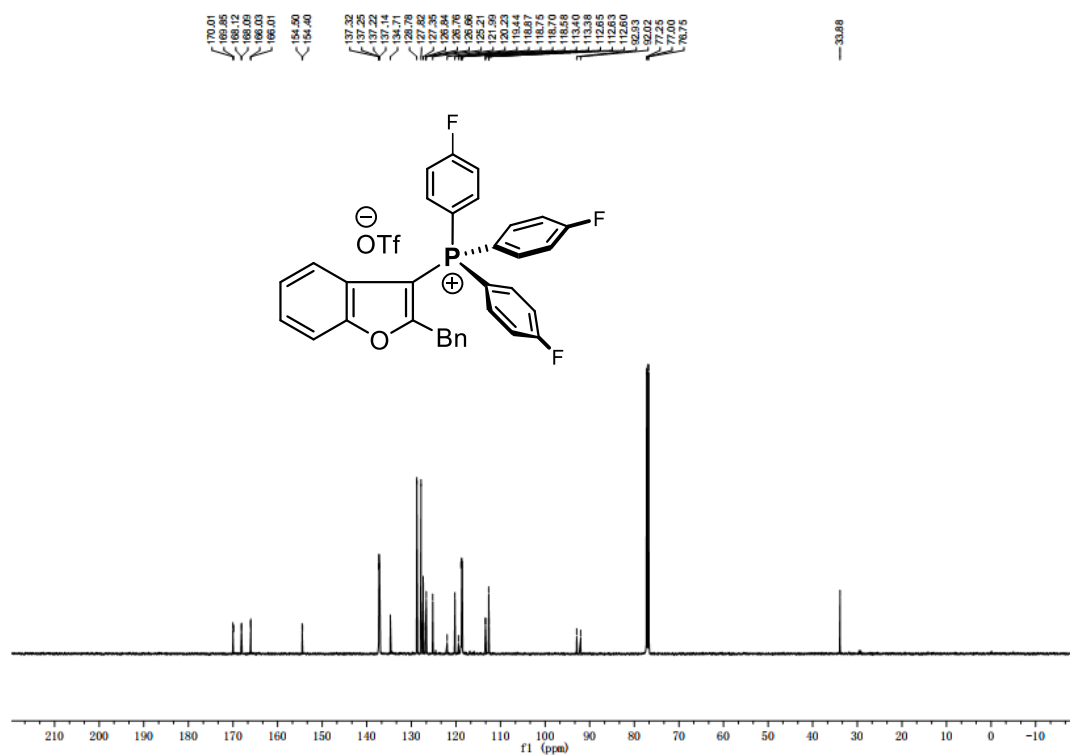

$^{19}\text{F}$  NMR (471 MHz,  $\text{CDCl}_3$ ) of compound **3ah**

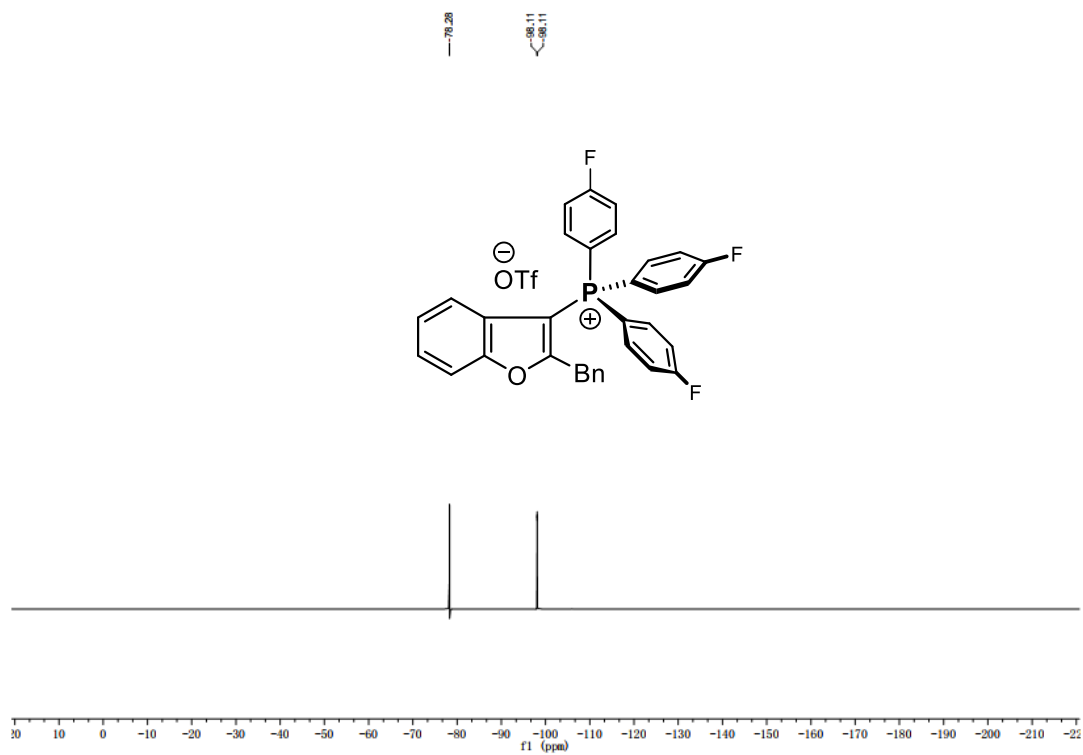



$^{13}\text{C}$  NMR (126 MHz,  $\text{CDCl}_3$ ) of compound **3ai**

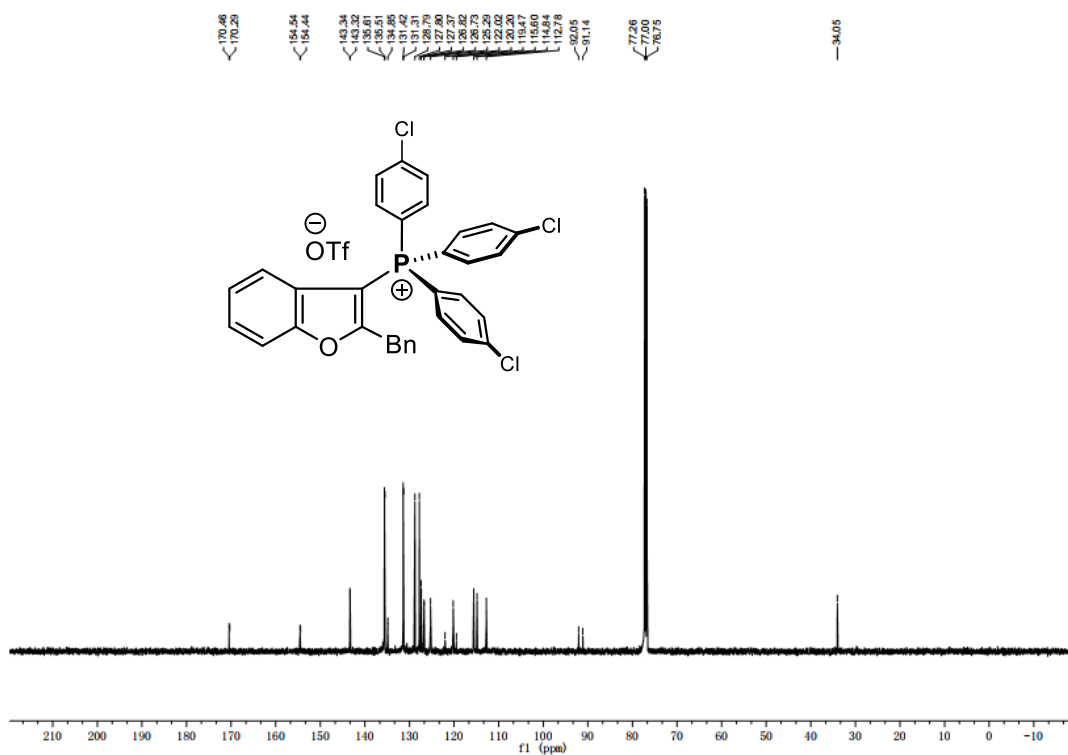

$^{19}\text{F}$  NMR (471 MHz,  $\text{CDCl}_3$ ) of compound **3ai**

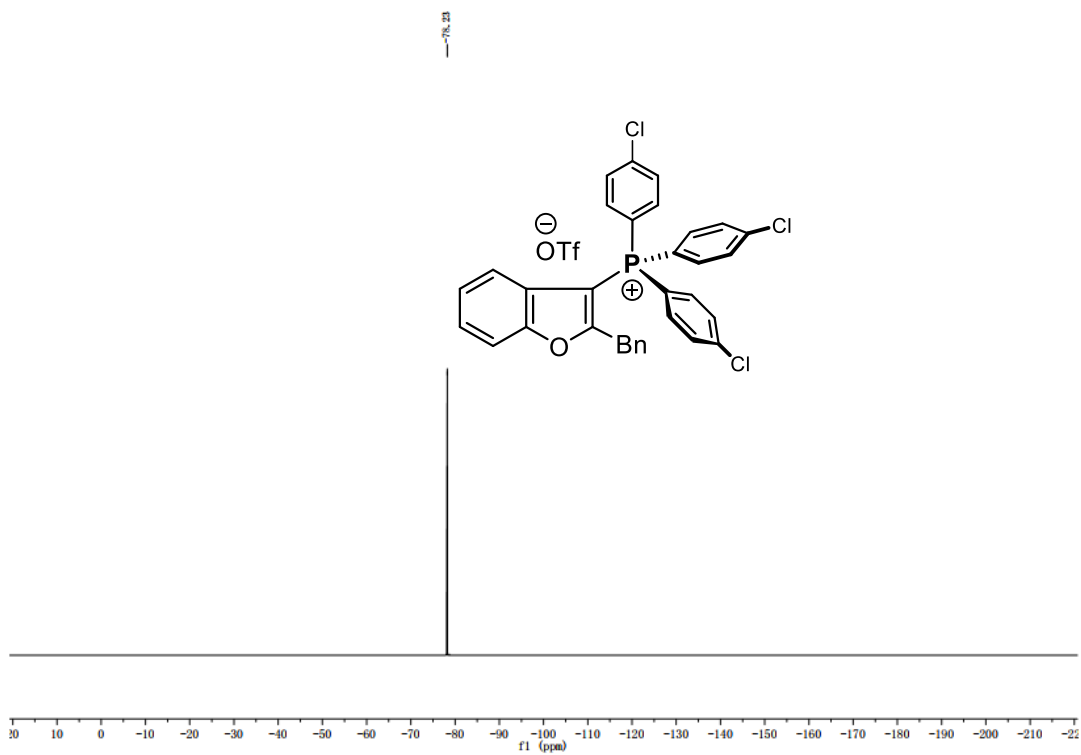

$^{31}\text{P}$  NMR (202 MHz,  $\text{CDCl}_3$ ) of compound **3ai**

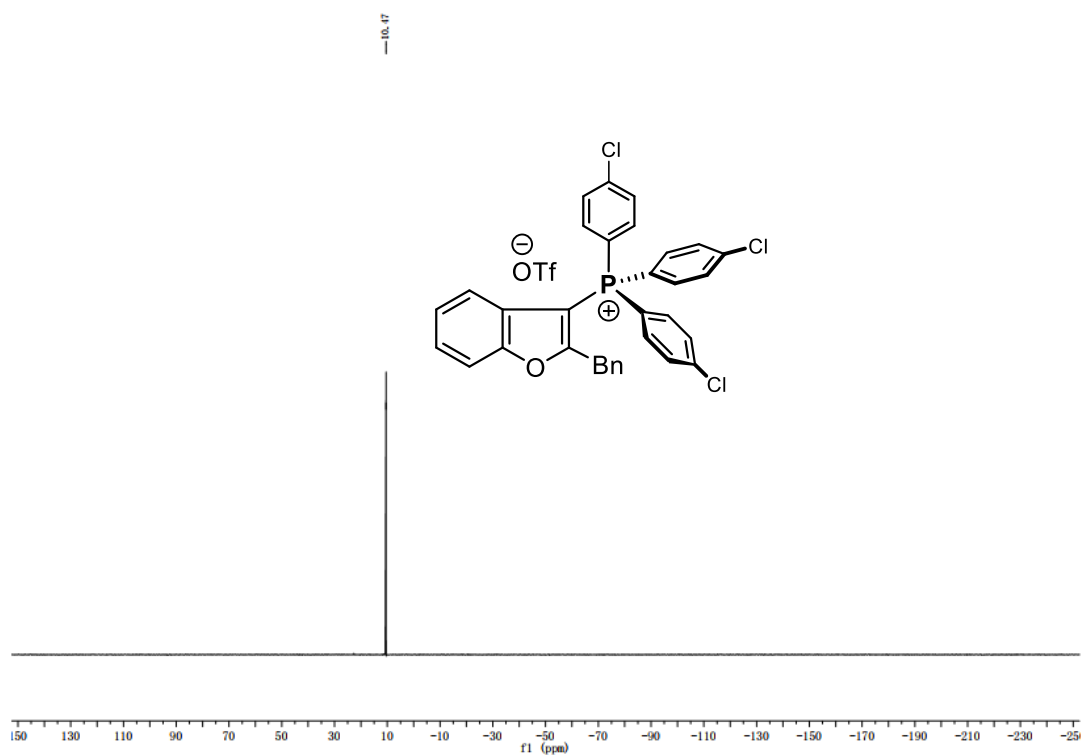

$^1\text{H}$  NMR (500 MHz,  $\text{CDCl}_3$ ) of compound **3aj**

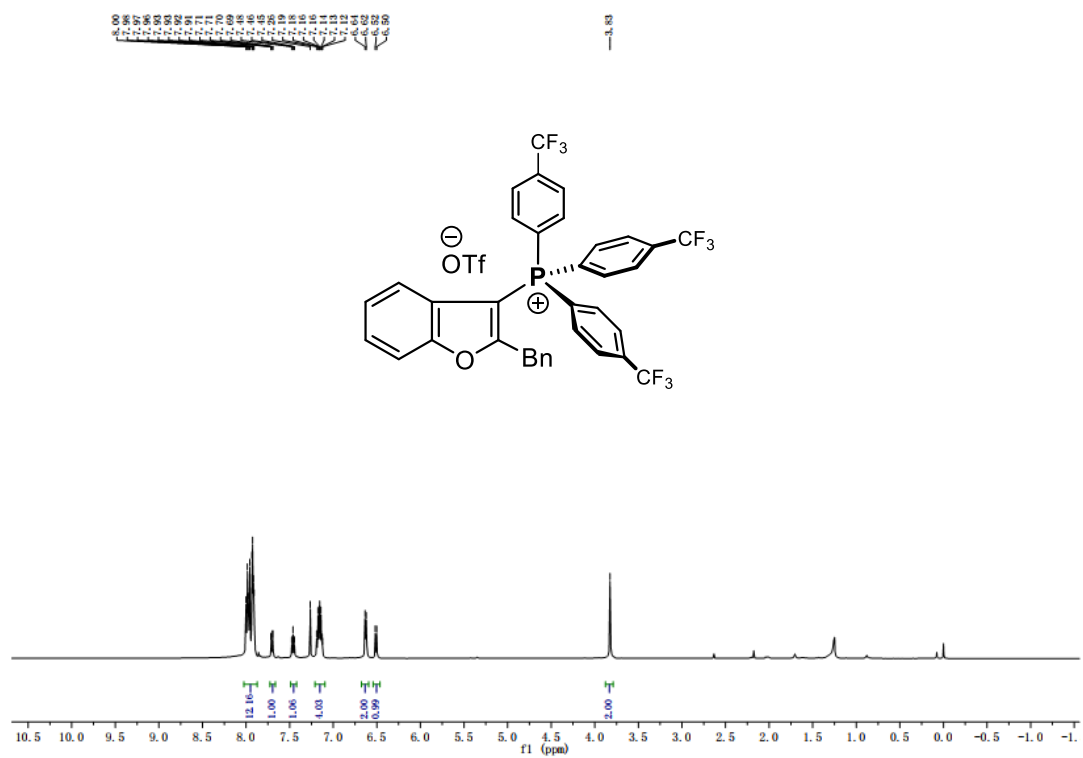

$^{13}\text{C}$  NMR (126 MHz,  $\text{CDCl}_3$ ) of compound **3aj**

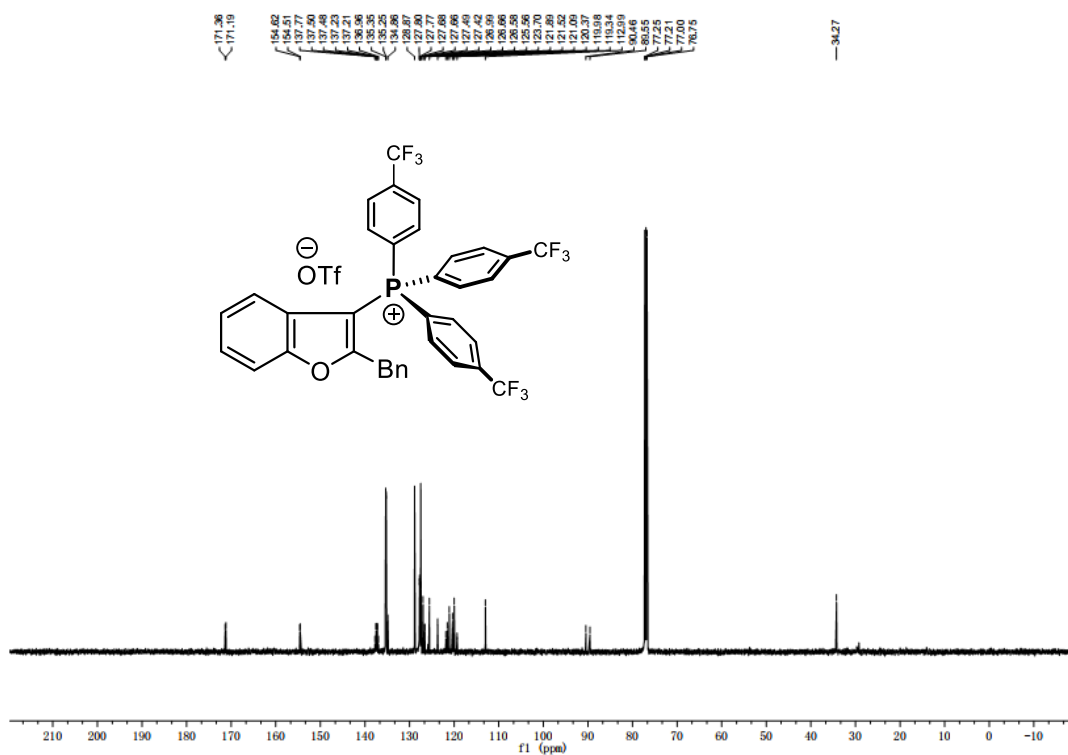

$^{19}\text{F}$  NMR (471 MHz,  $\text{CDCl}_3$ ) of compound **3aj**

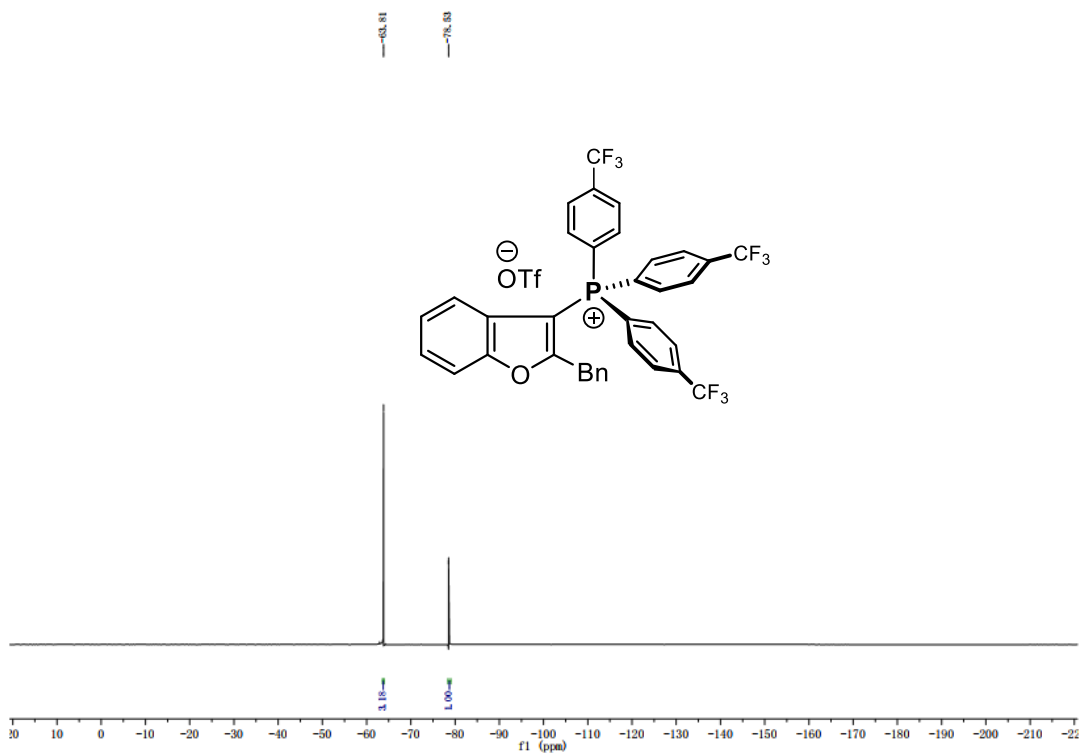

$^{31}\text{P}$  NMR (202 MHz,  $\text{CDCl}_3$ ) of compound **3aj**

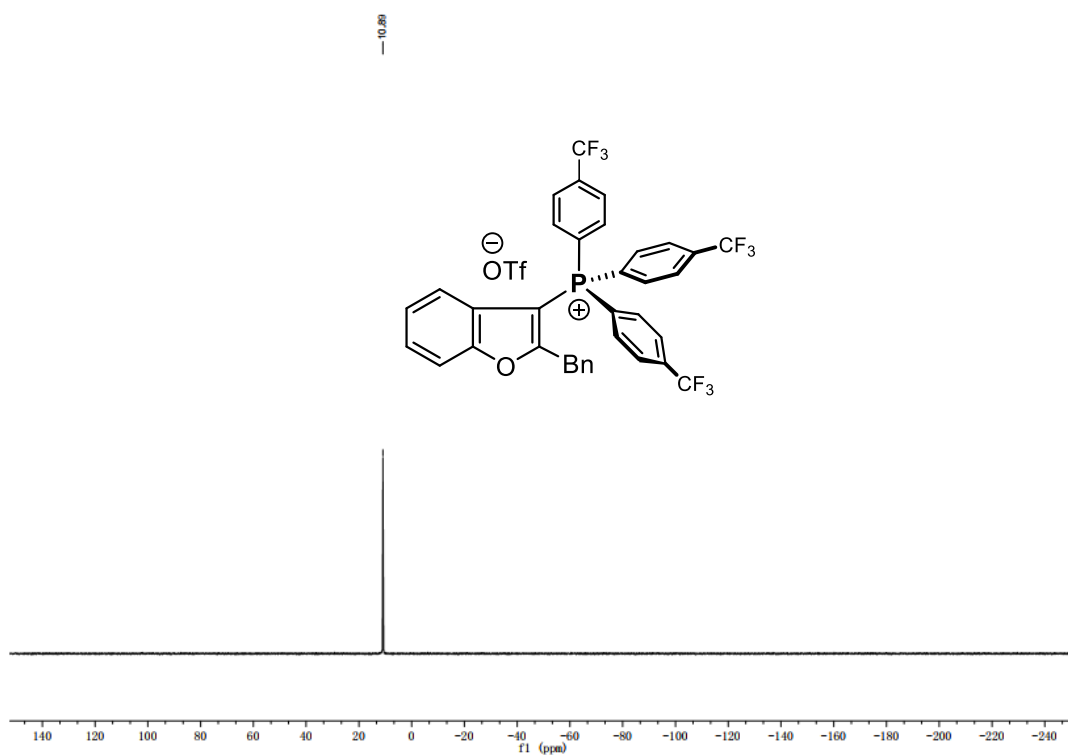

$^1\text{H}$  NMR (500 MHz,  $\text{CDCl}_3$ ) of compound **3ak**

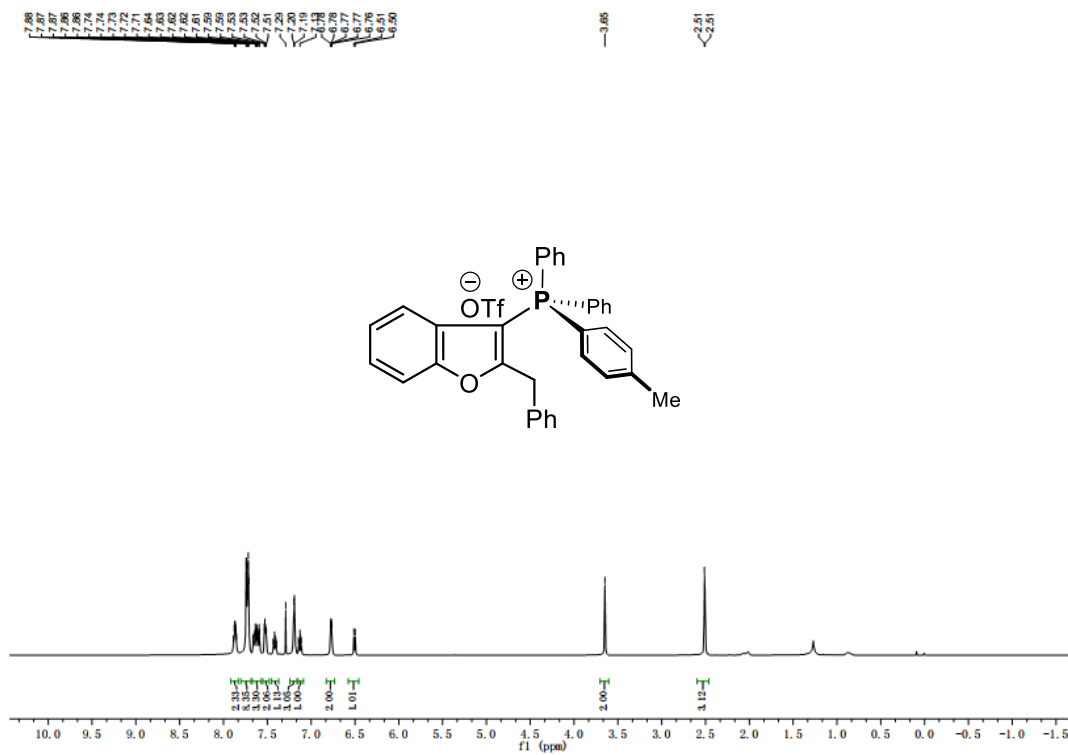

$^{13}\text{C}$  NMR (126 MHz,  $\text{CDCl}_3$ ) of compound **3ak**

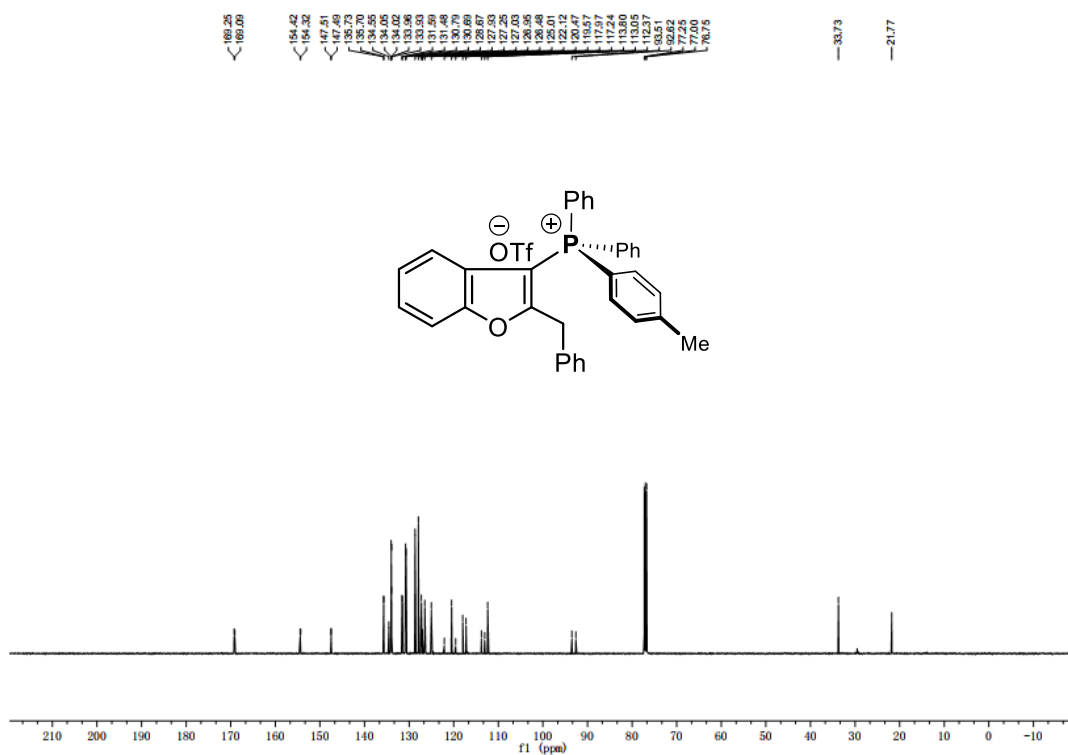

$^{19}\text{F}$  NMR (471 MHz,  $\text{CDCl}_3$ ) of compound **3ak**

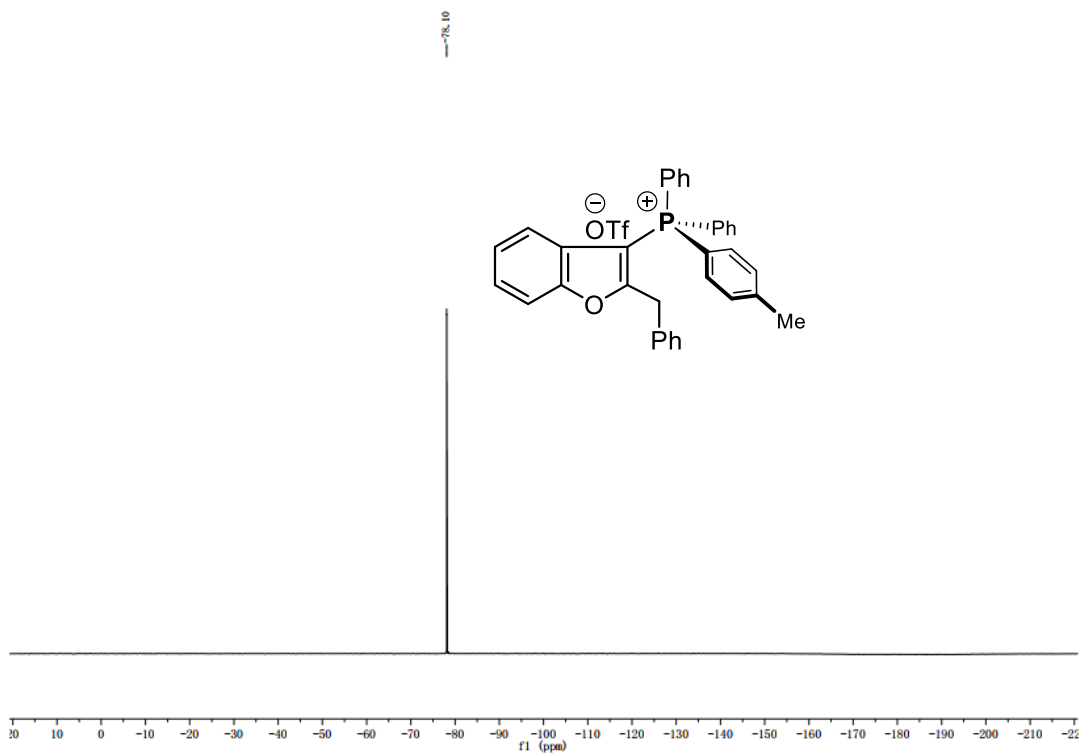



$^{31}\text{P}$  NMR (202 MHz,  $\text{CDCl}_3$ ) of compound **3ak**

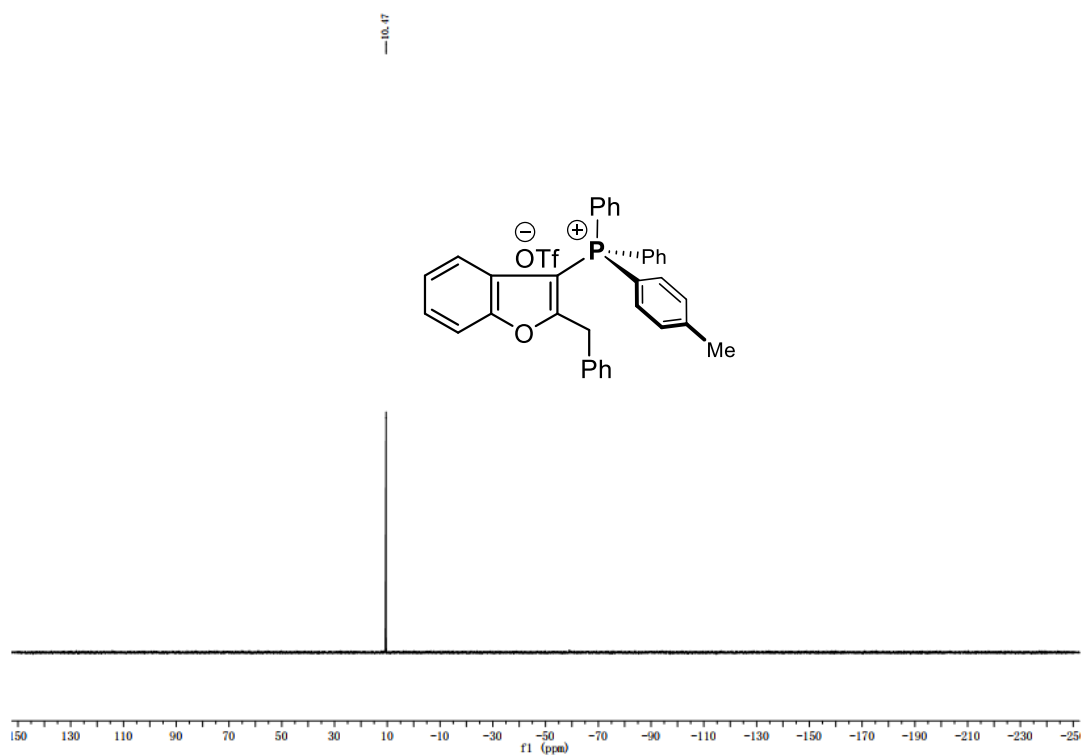

$^1\text{H}$  NMR (500 MHz,  $\text{CDCl}_3$ ) of compound **3al**

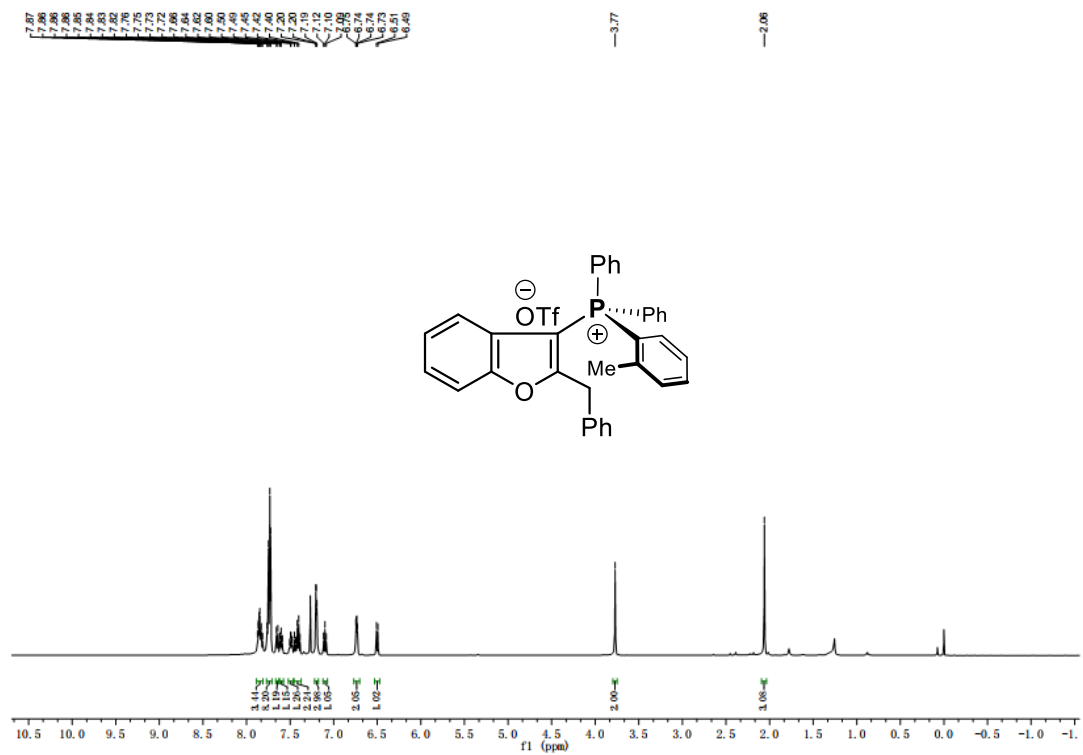

$^{13}\text{C}$  NMR (126 MHz,  $\text{CDCl}_3$ ) of compound **3al**

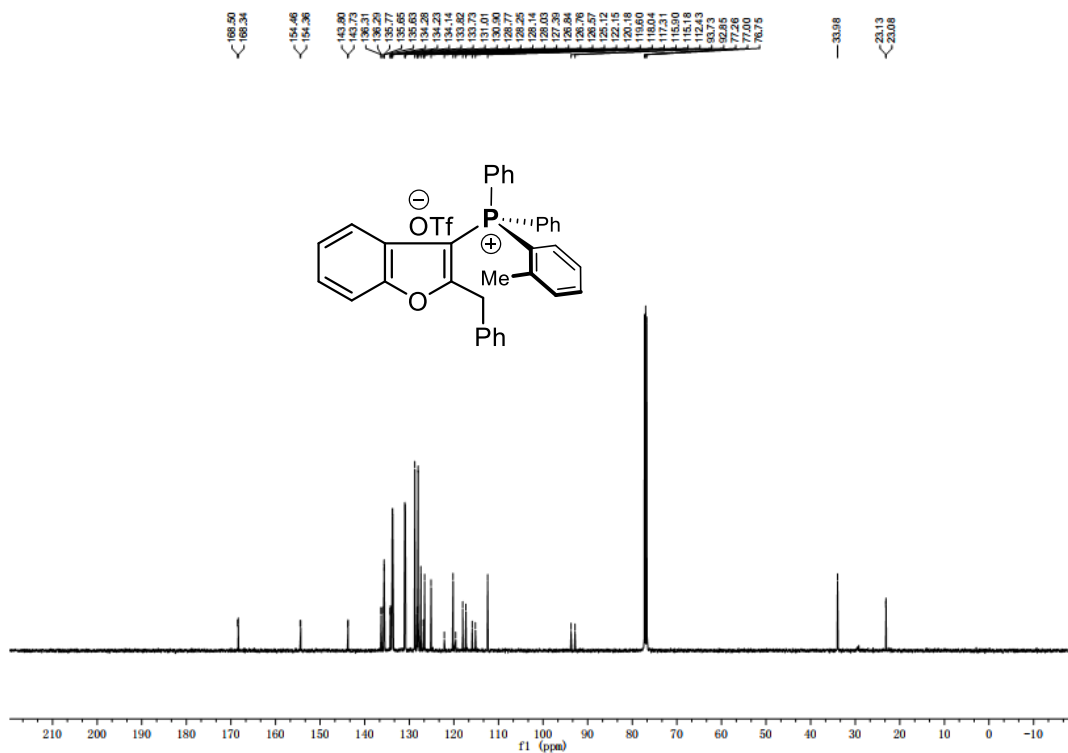

$^{19}\text{F}$  NMR (471 MHz,  $\text{CDCl}_3$ ) of compound **3al**

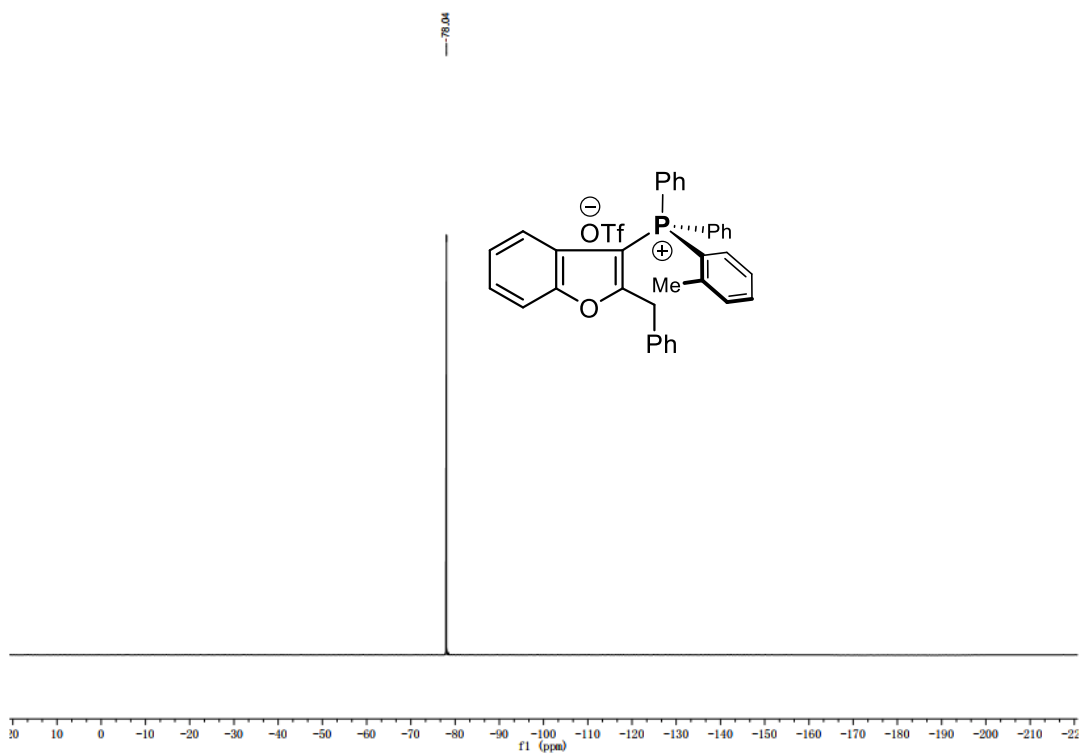

$^{31}\text{P}$  NMR (202 MHz,  $\text{CDCl}_3$ ) of compound **3al**

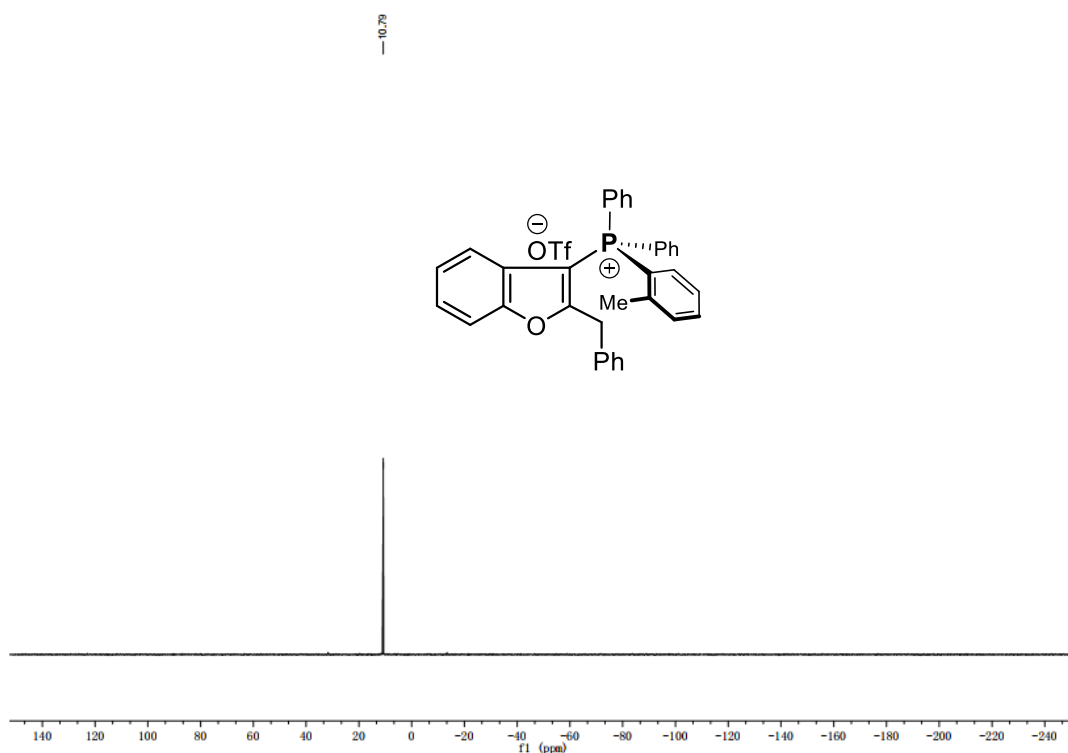

$^1\text{H}$  NMR (500 MHz,  $\text{CDCl}_3$ ) of compound **3am**

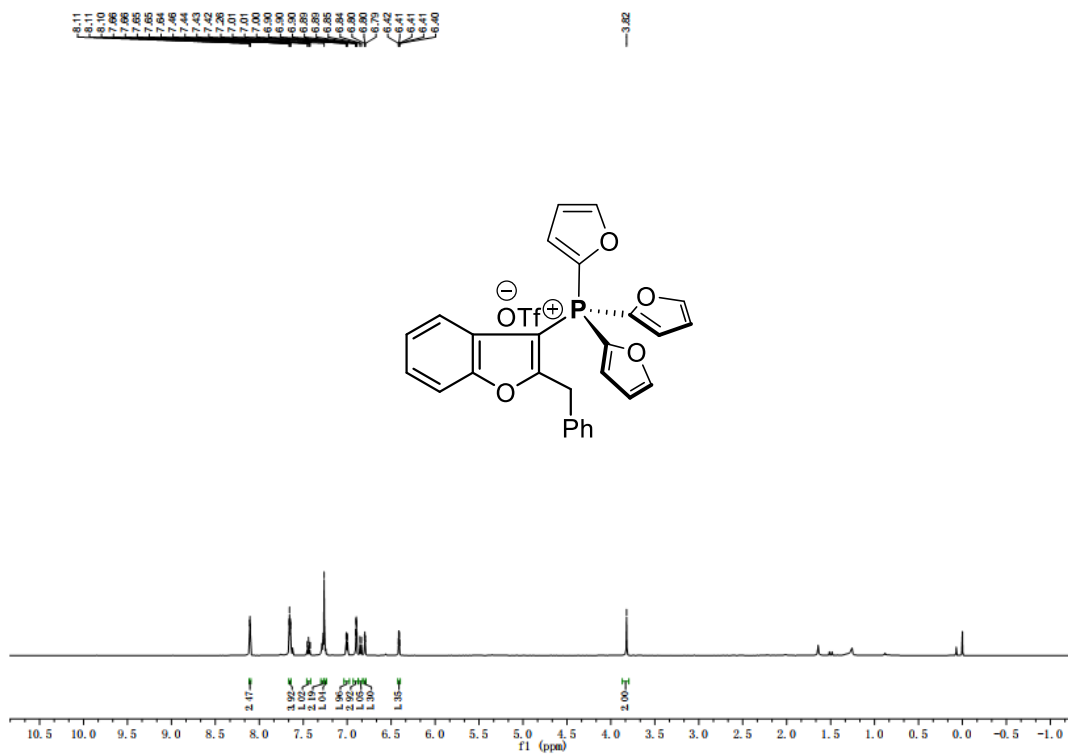

$^{13}\text{C}$  NMR (126 MHz,  $\text{CDCl}_3$ ) of compound **3am**

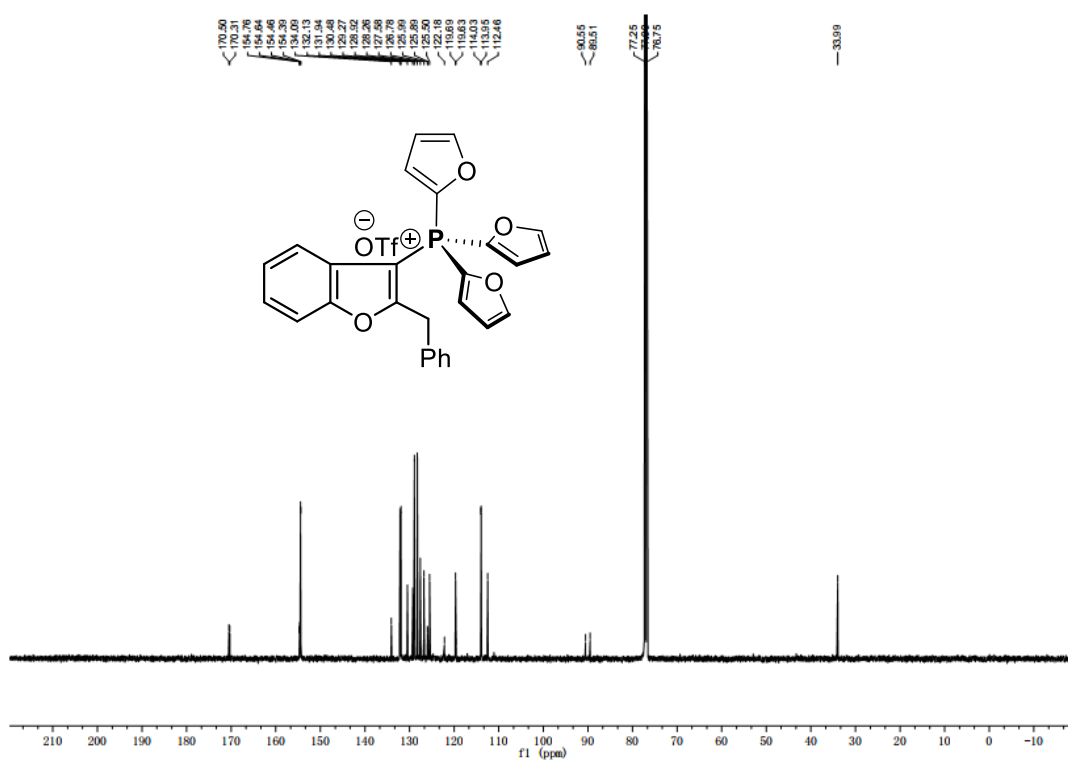

$^{31}\text{P}$  NMR (202 MHz,  $\text{CDCl}_3$ ) of compound **3am**

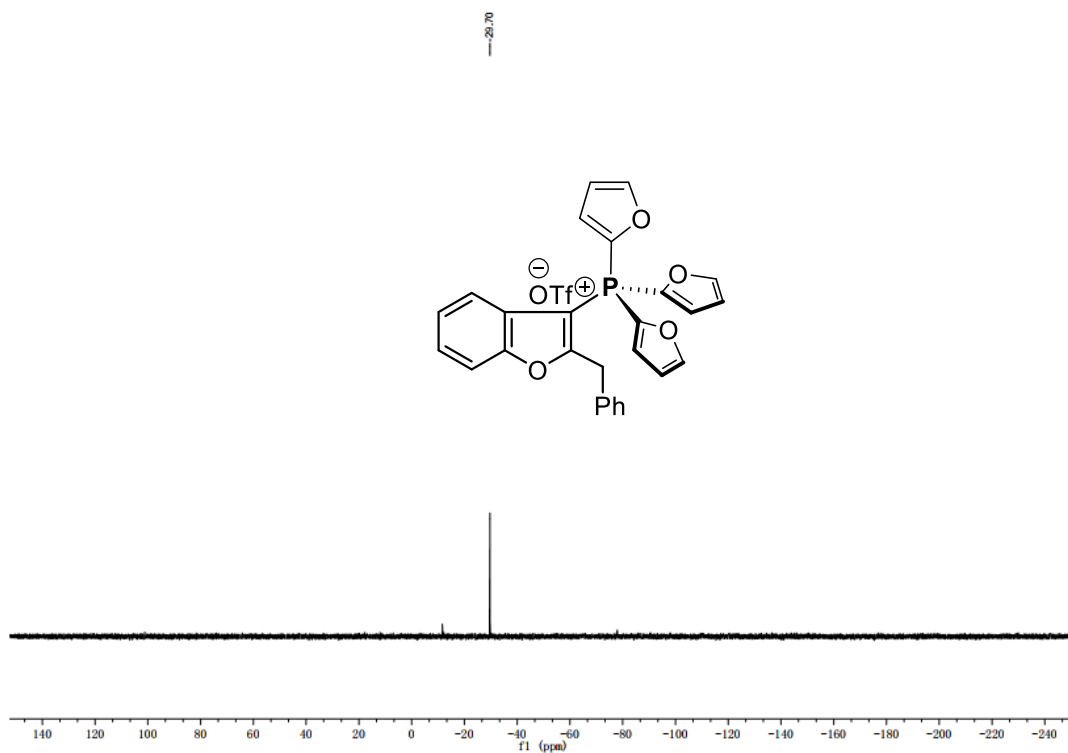

$^{19}\text{F}$  NMR (471 MHz,  $\text{CDCl}_3$ ) of compound **3am**

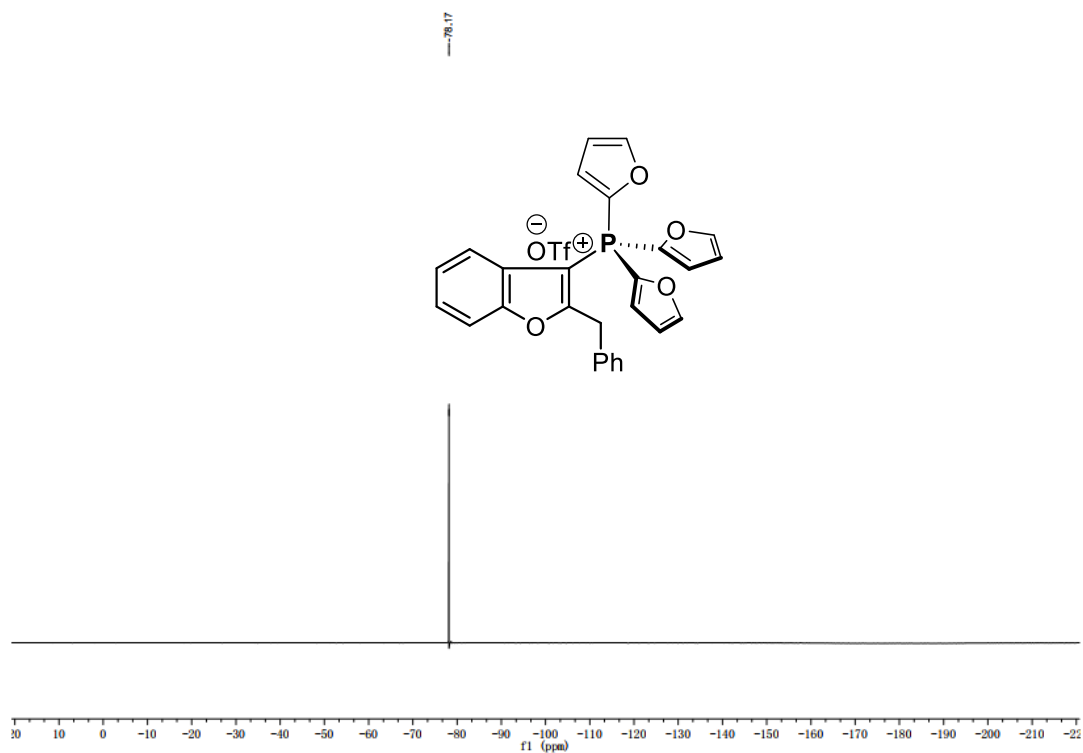

$^1\text{H}$  NMR (500 MHz,  $\text{CDCl}_3$ ) of compound **3an**

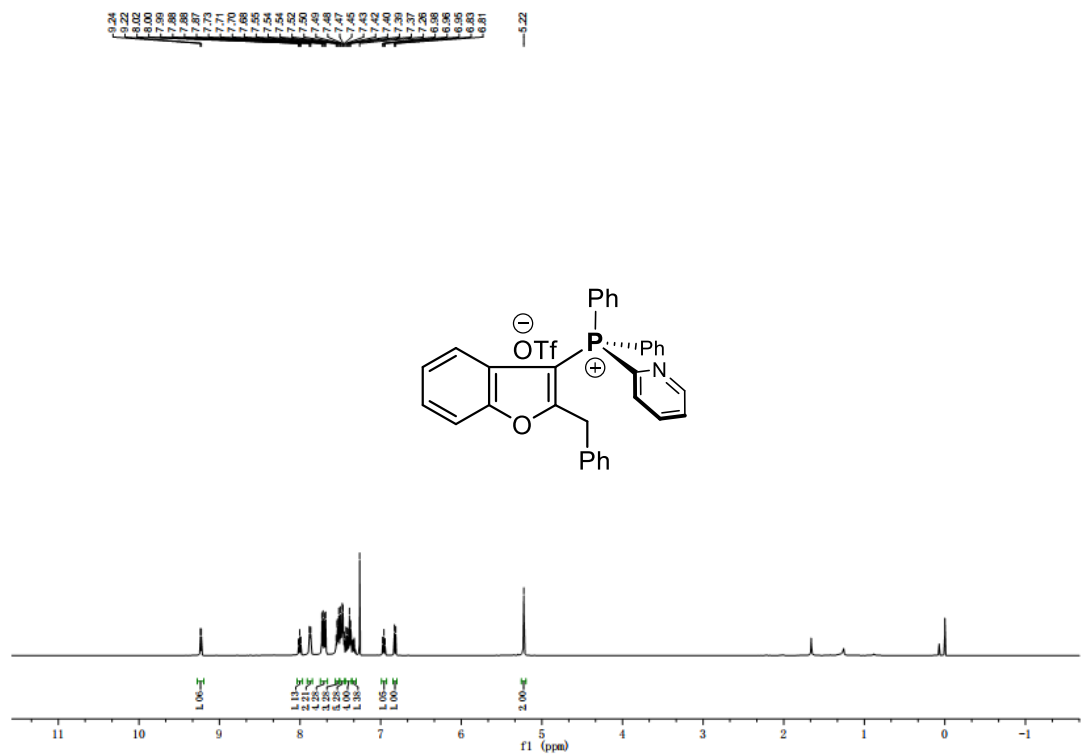

$^{13}\text{C}$  NMR (126 MHz,  $\text{CDCl}_3$ ) of compound **3an**

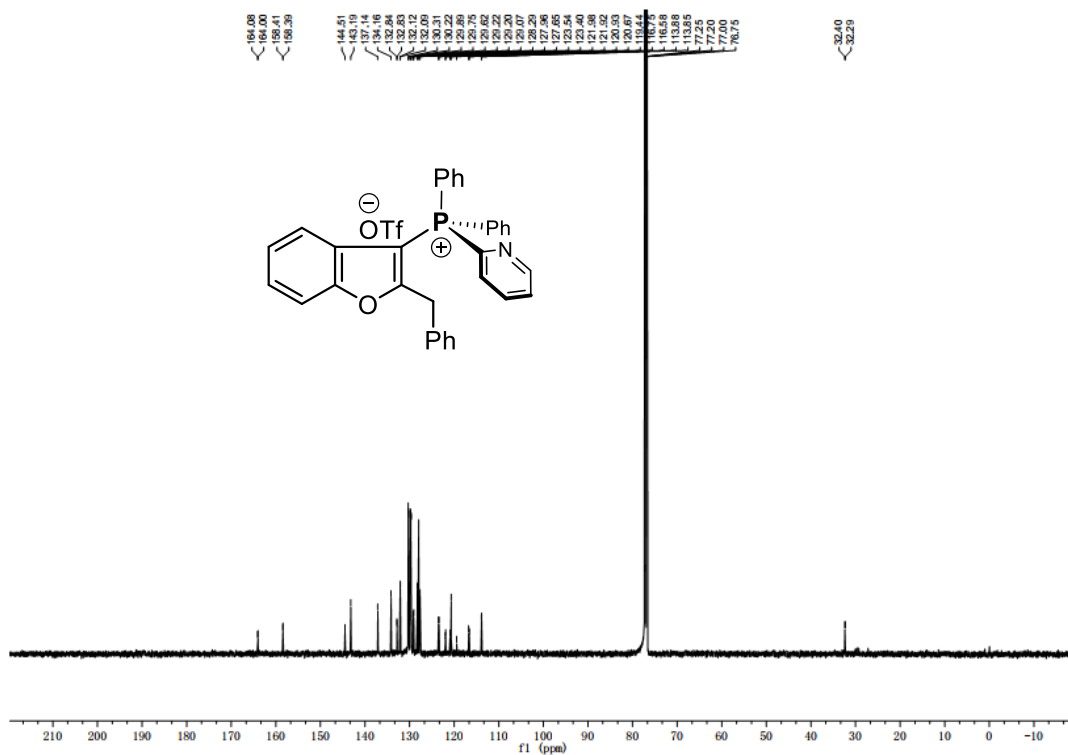

$^{19}\text{F}$  NMR (471 MHz,  $\text{CDCl}_3$ ) of compound **3an**

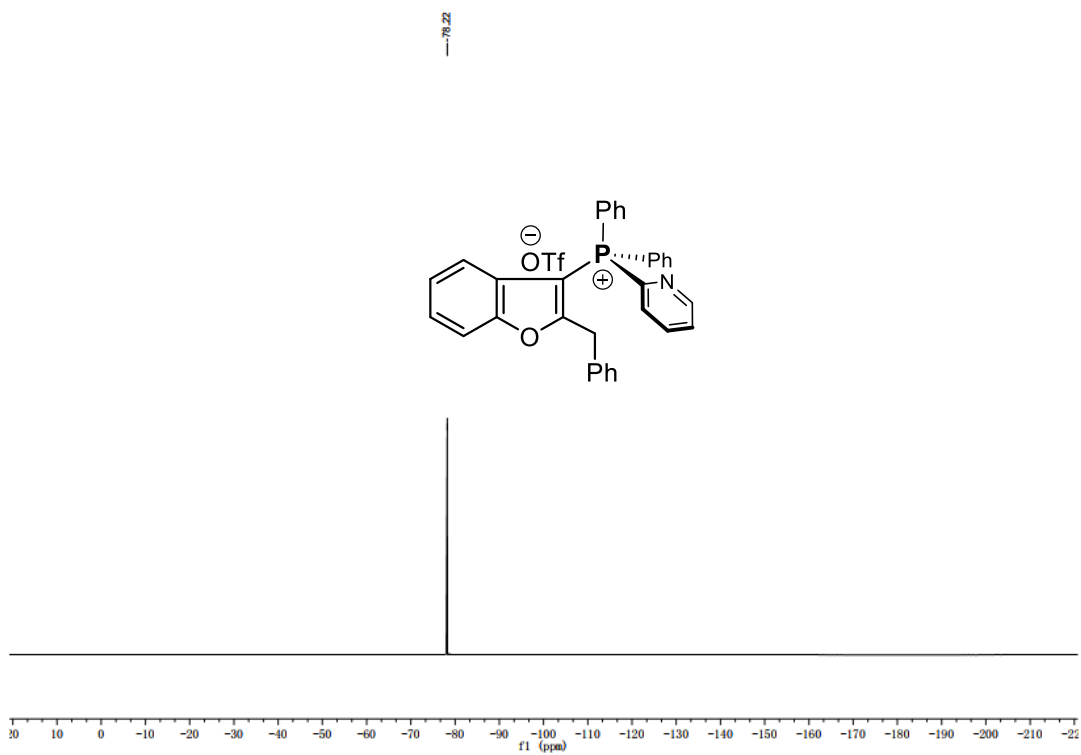

$^{31}\text{P}$  NMR (202 MHz,  $\text{CDCl}_3$ ) of compound **3an**

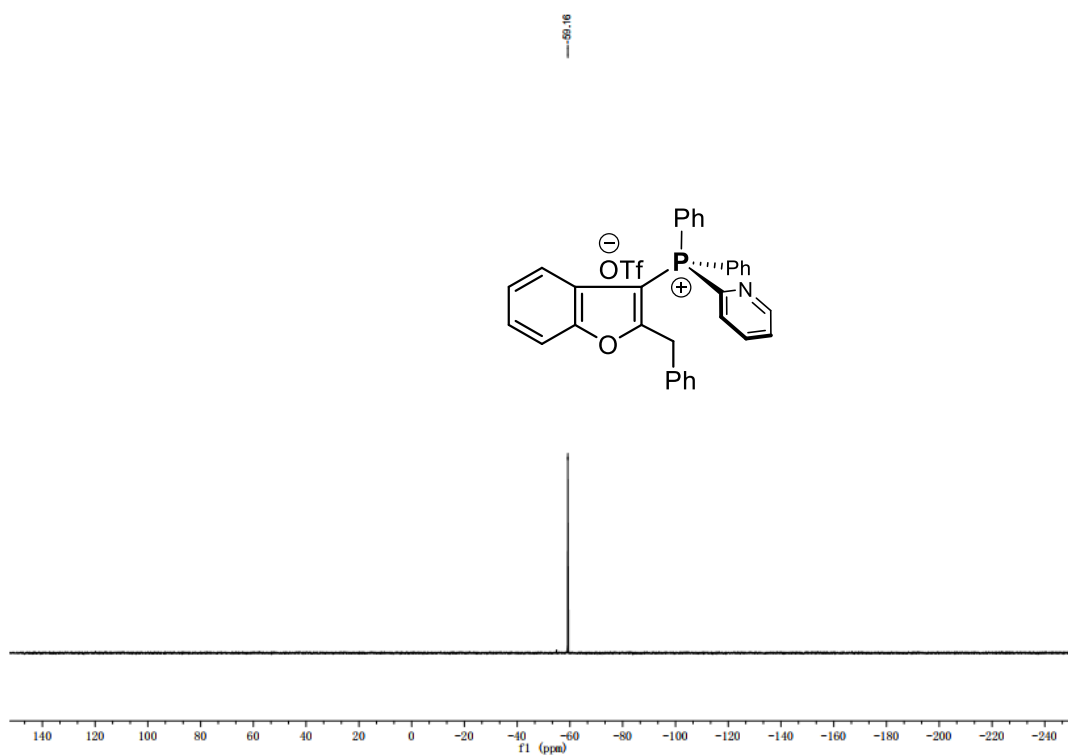

$^1\text{H}$  NMR (500 MHz,  $\text{CDCl}_3$ ) of compound **3ao**

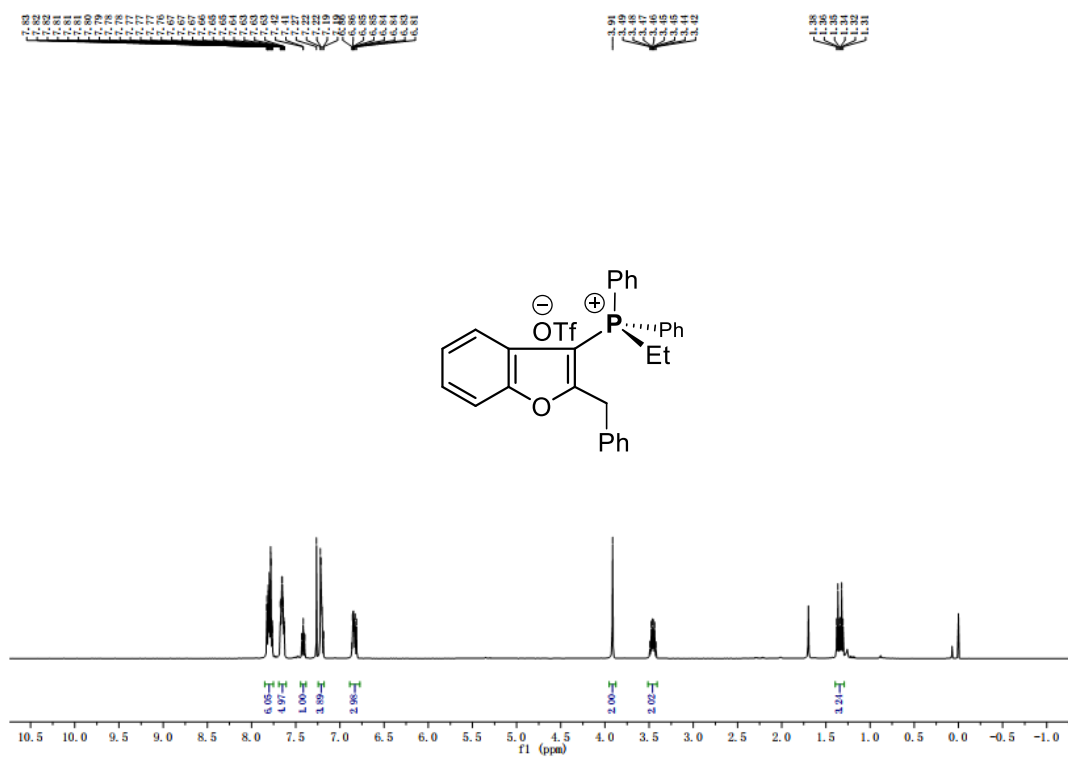

$^{13}\text{C}$  NMR (126 MHz,  $\text{CDCl}_3$ ) of compound **3ao**

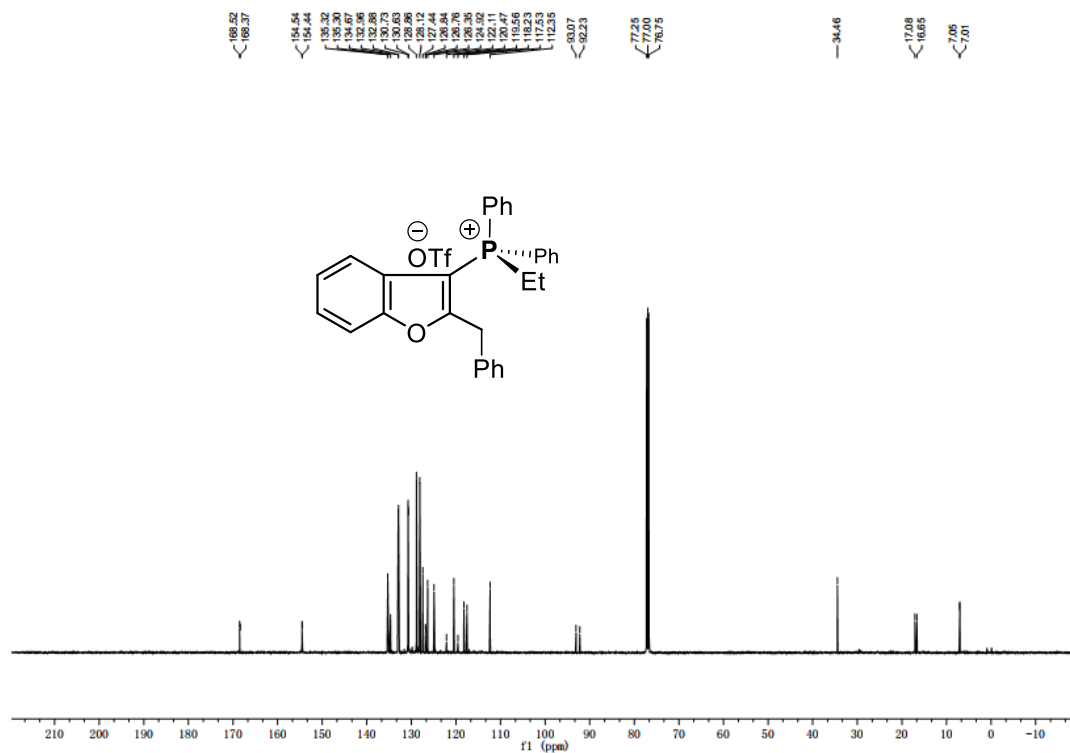

$^{19}\text{F}$  NMR (471 MHz,  $\text{CDCl}_3$ ) of compound **3ao**

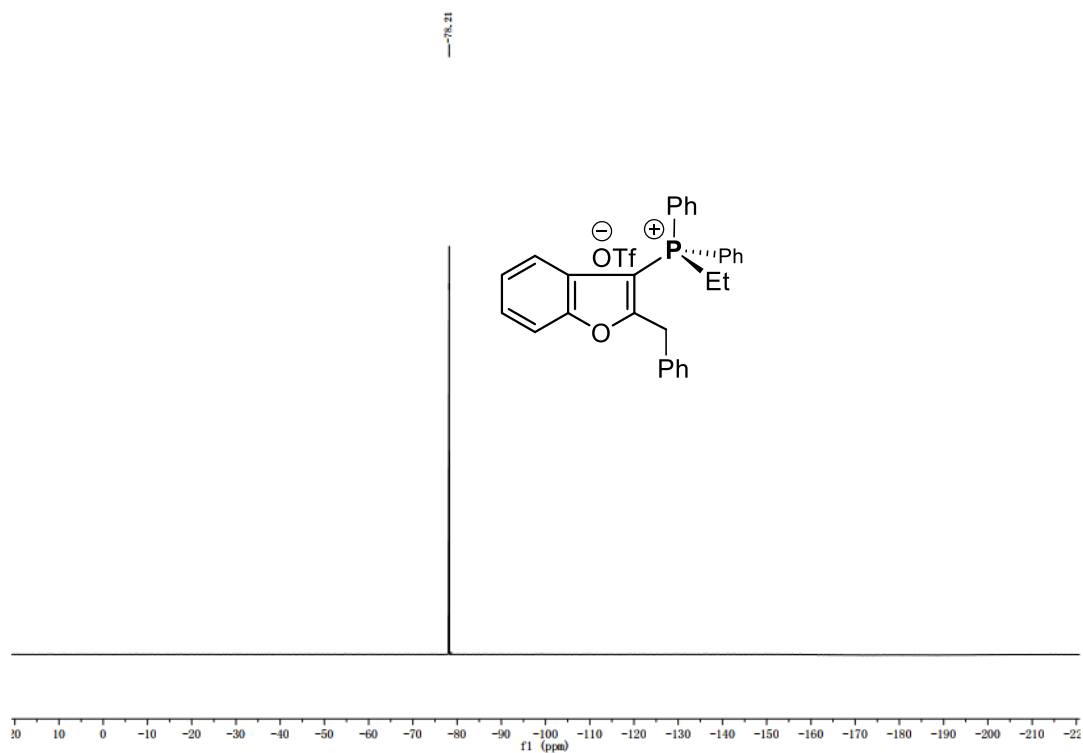



$^{31}\text{P}$  NMR (202 MHz,  $\text{CDCl}_3$ ) of compound **3ao**

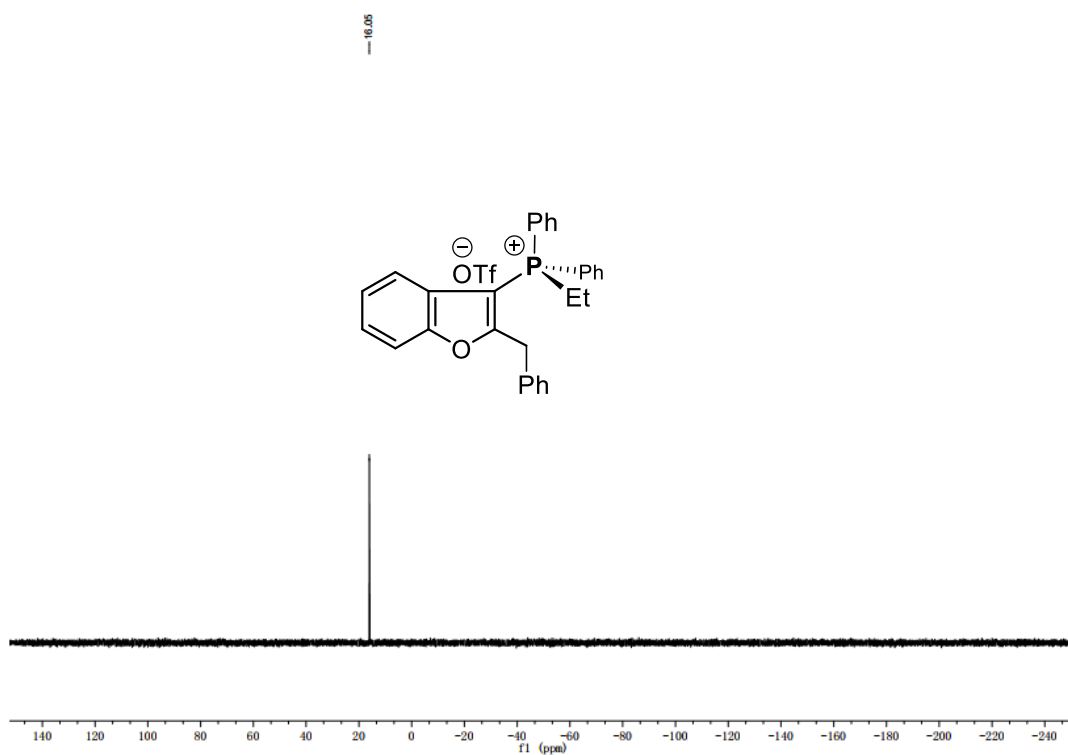

$^1\text{H}$  NMR (500 MHz,  $\text{CDCl}_3$ ) of compound **3ap**

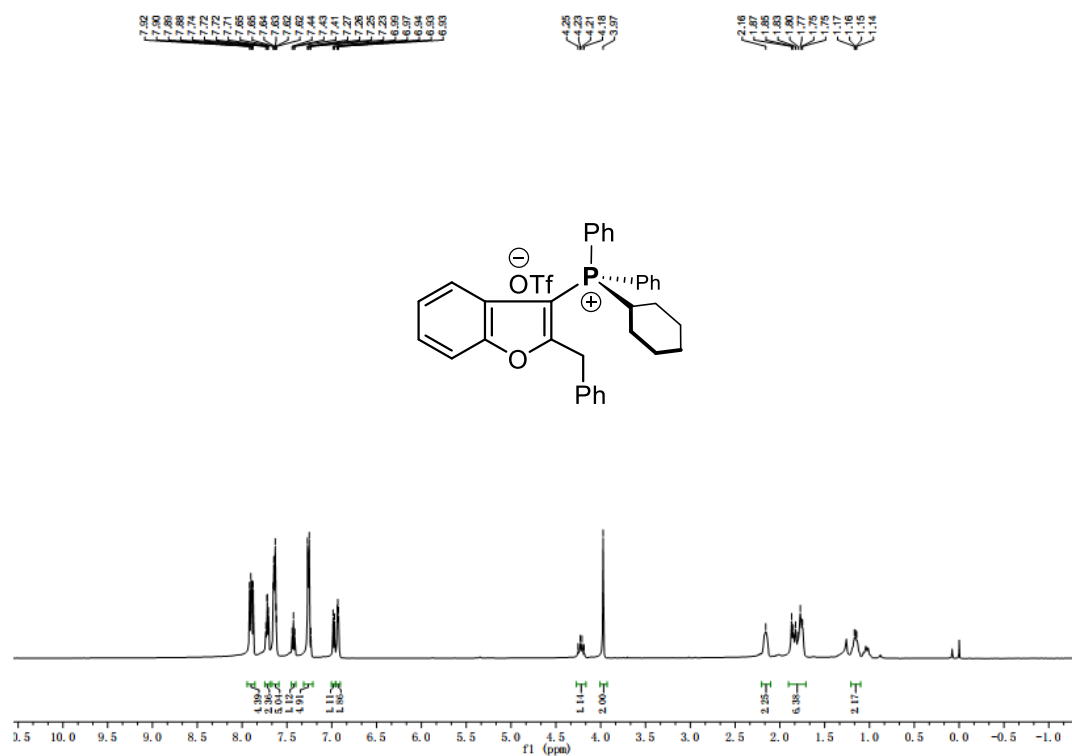

$^{13}\text{C}$  NMR (126 MHz,  $\text{CDCl}_3$ ) of compound **3ap**

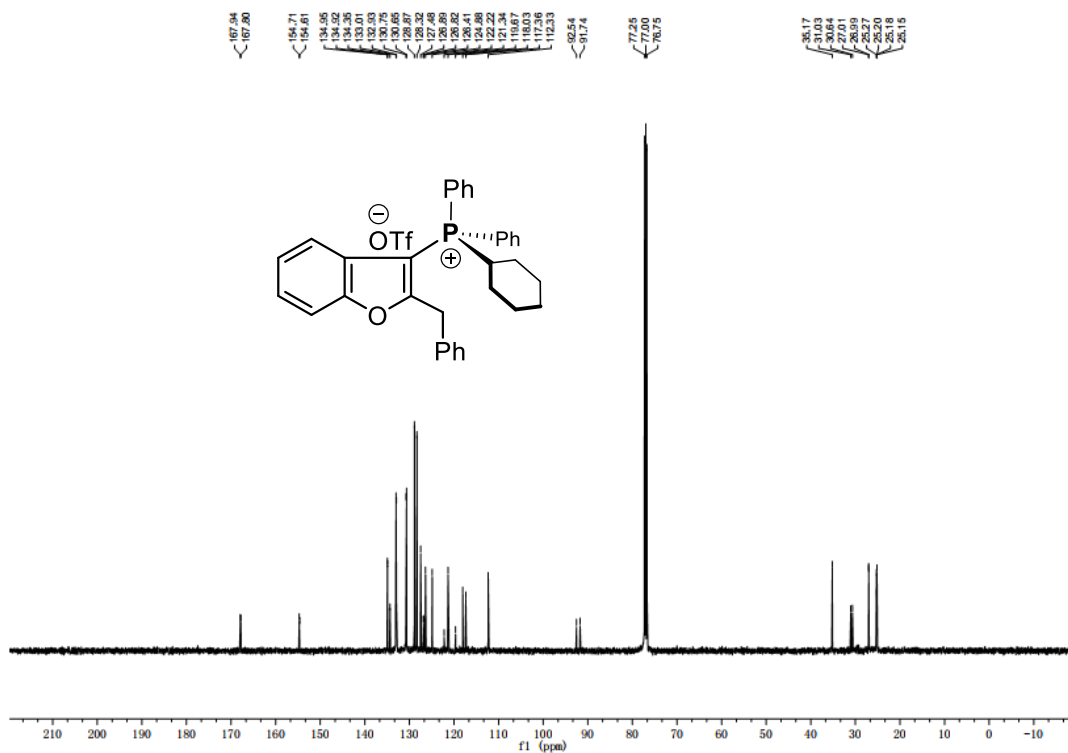

$^{19}\text{F}$  NMR (471 MHz,  $\text{CDCl}_3$ ) of compound **3ap**

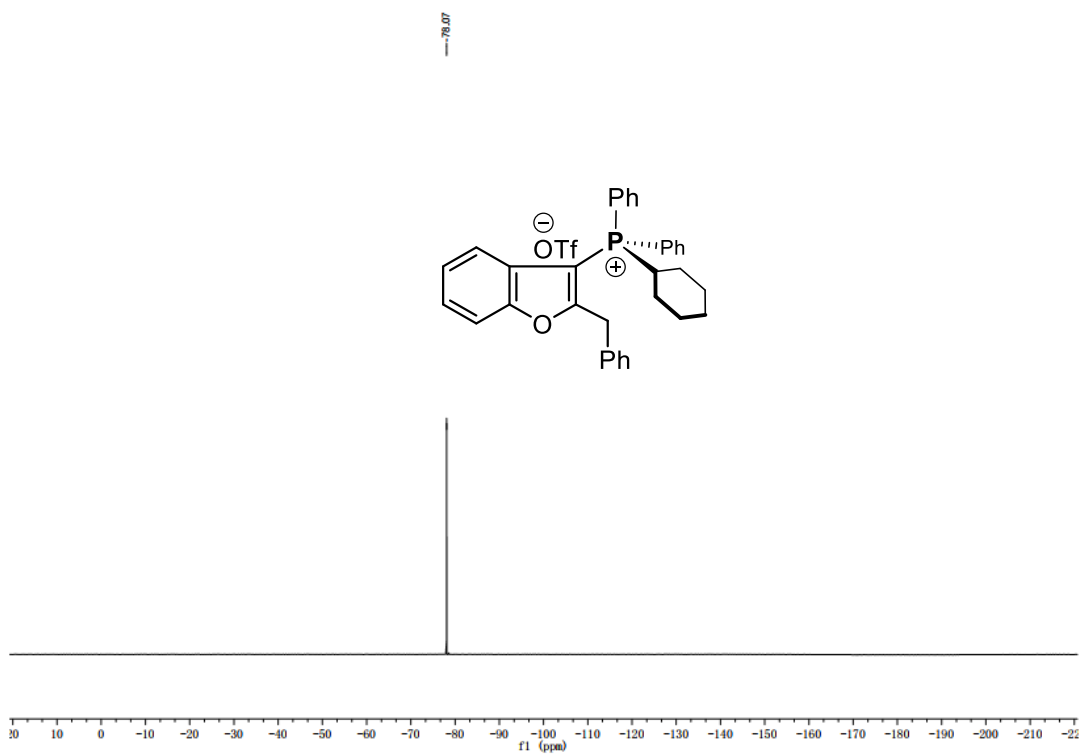

$^{31}\text{P}$  NMR (202 MHz,  $\text{CDCl}_3$ ) of compound **3ap**

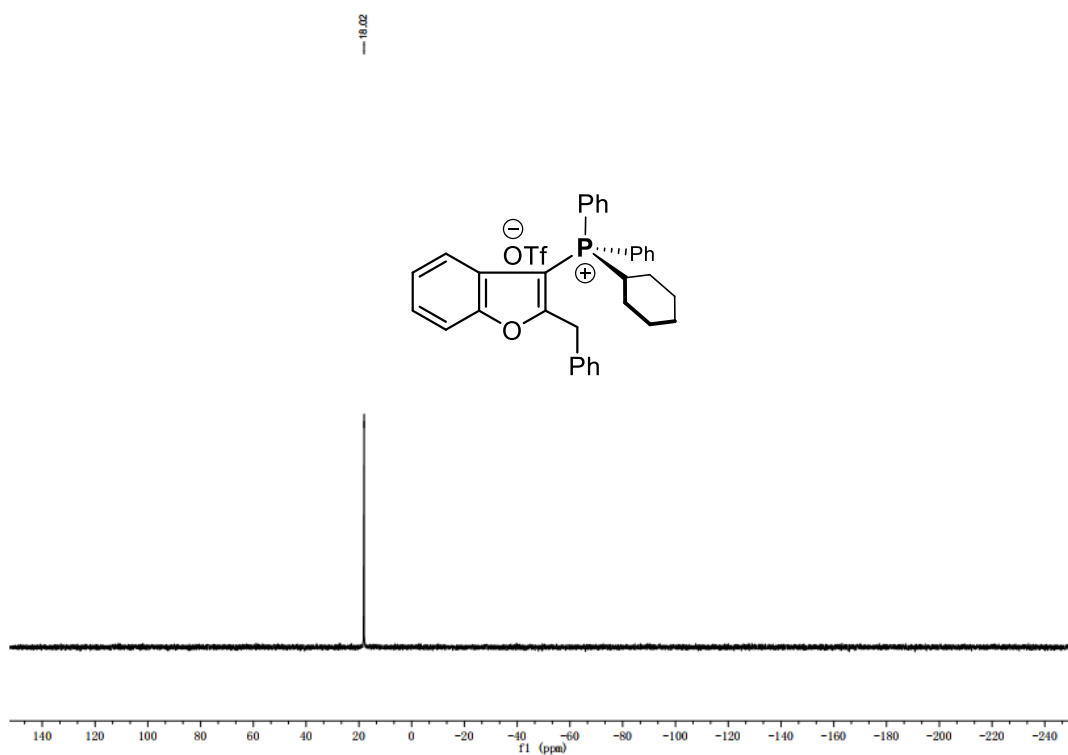

$^1\text{H}$  NMR (500 MHz,  $\text{CDCl}_3$ ) of compound **3aq**

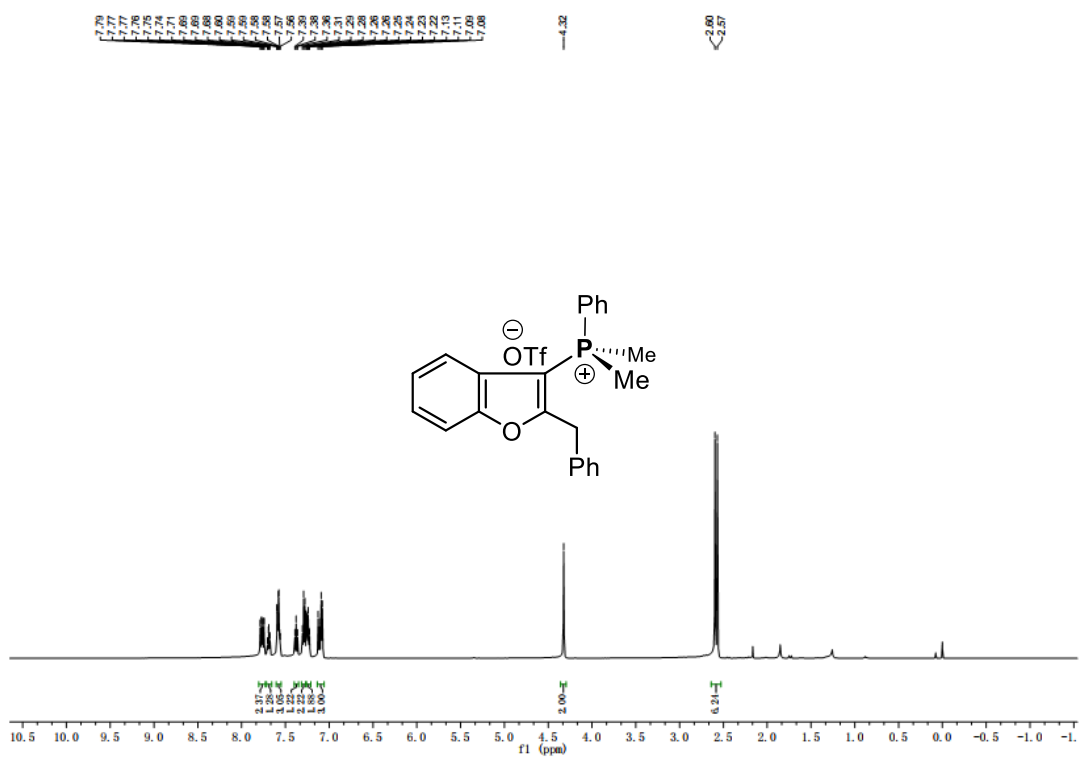



$^{31}\text{P}$  NMR (202 MHz,  $\text{CDCl}_3$ ) of compound **3aq**

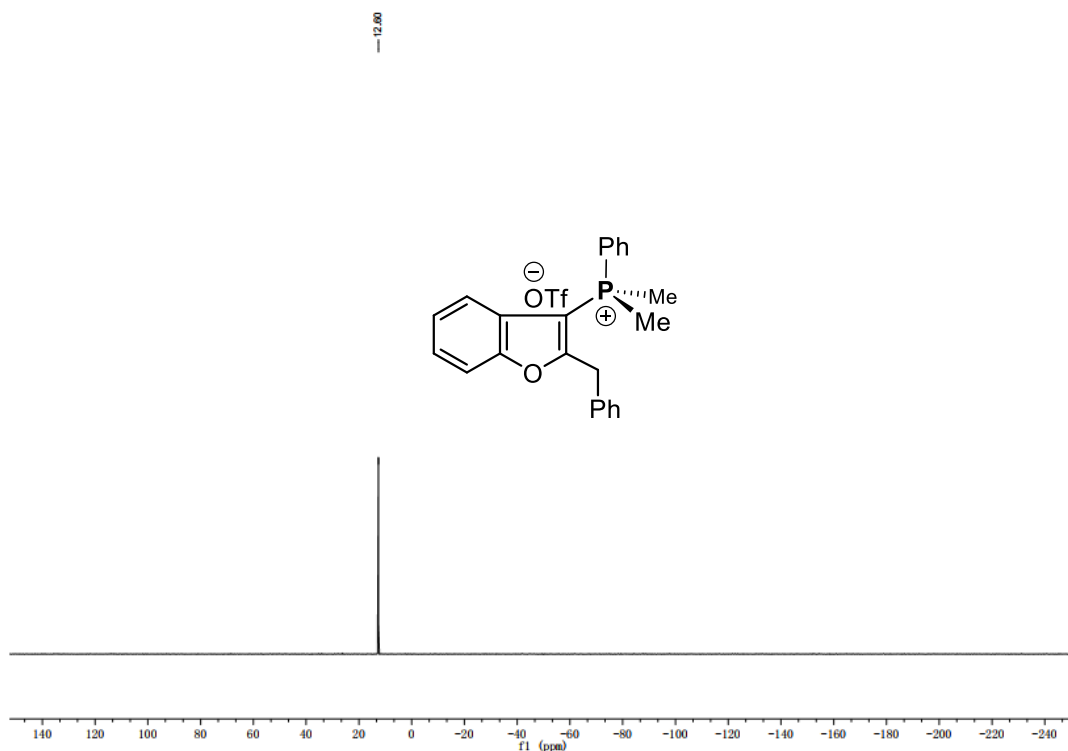

$^1\text{H}$  NMR (500 MHz,  $\text{CDCl}_3$ ) of compound **3ar**

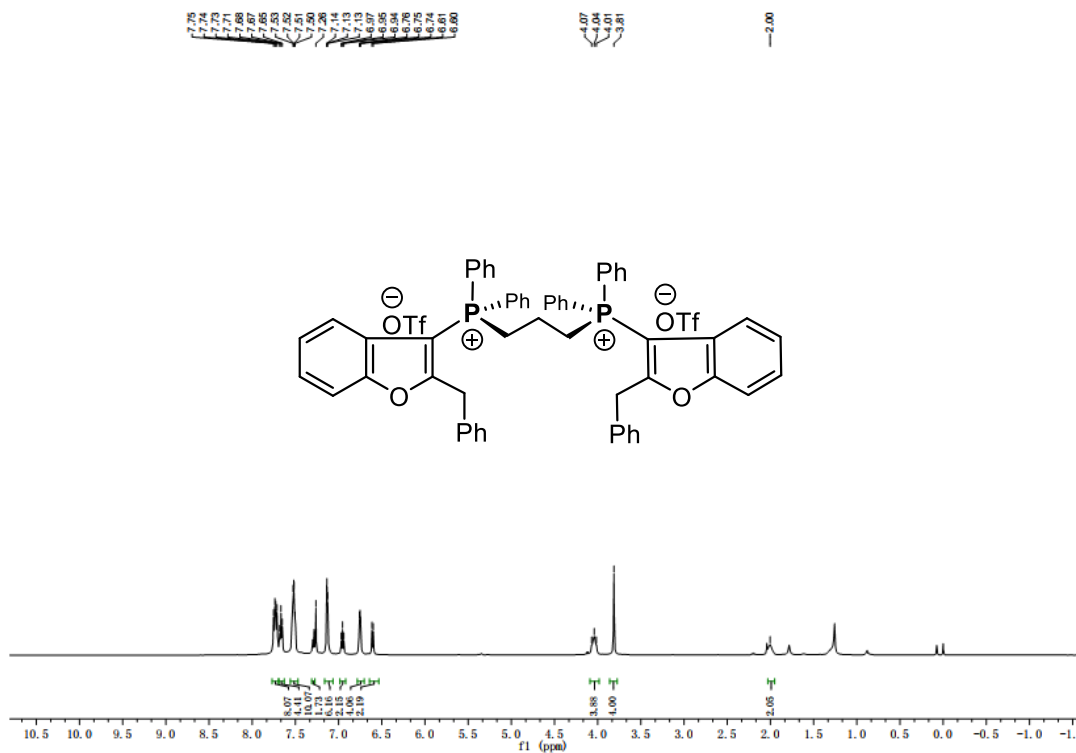

<sup>13</sup>C NMR (126 MHz, CDCl<sub>3</sub>) of compound **3ar**

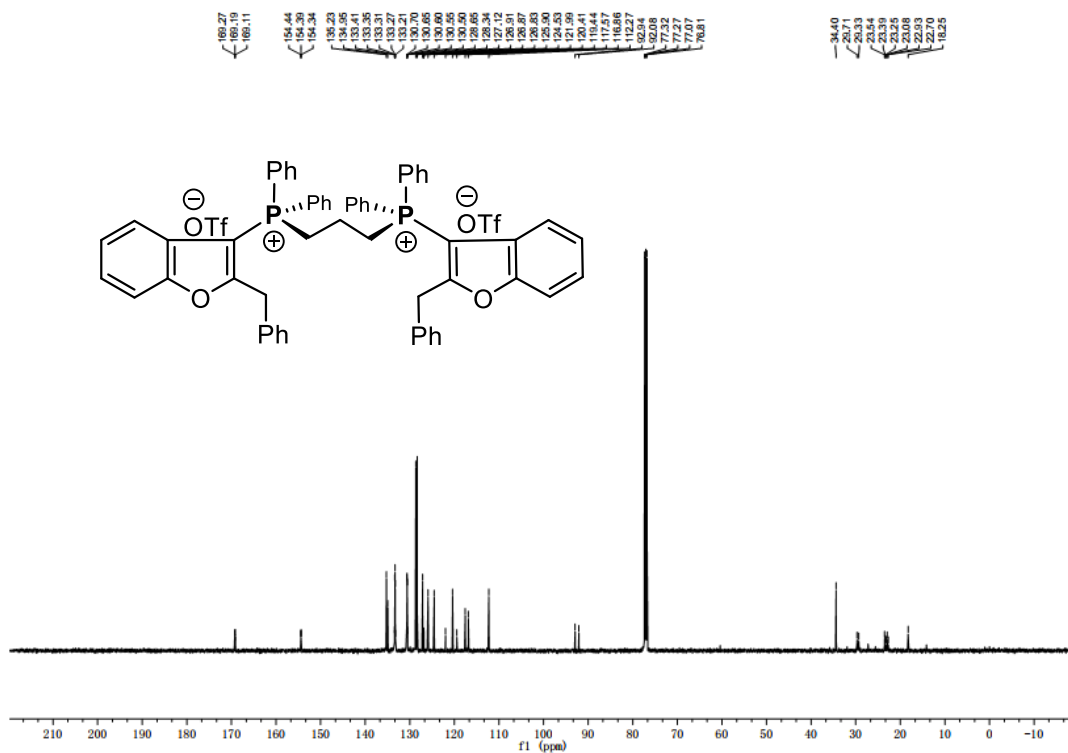

<sup>19</sup>F NMR (471 MHz, CDCl<sub>3</sub>) of compound **3ar**

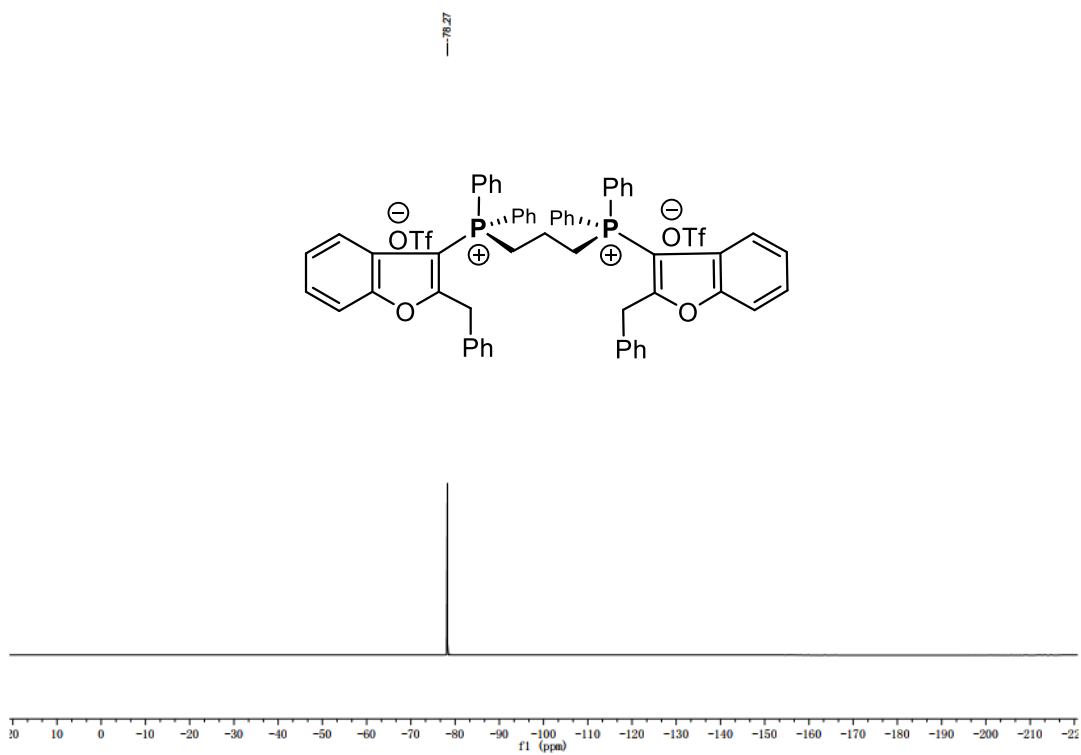

$^{31}\text{P}$  NMR (202 MHz,  $\text{CDCl}_3$ ) of compound **3ar**

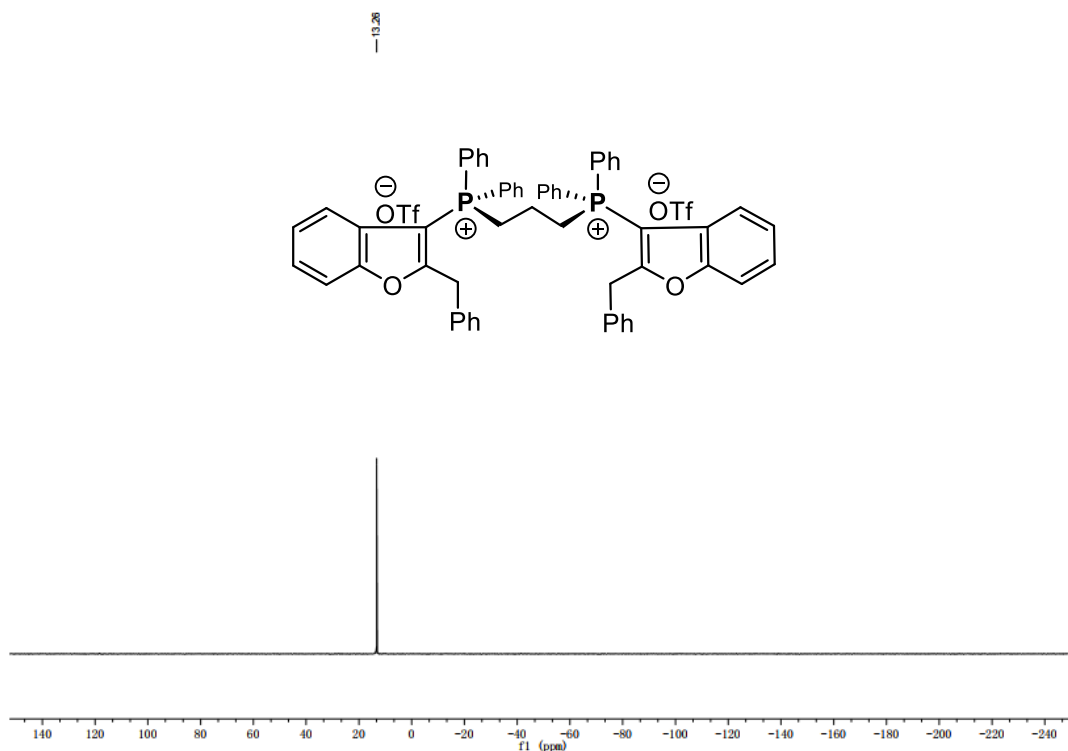

$^1\text{H}$  NMR (500 MHz,  $\text{CDCl}_3$ ) of compound **3as**

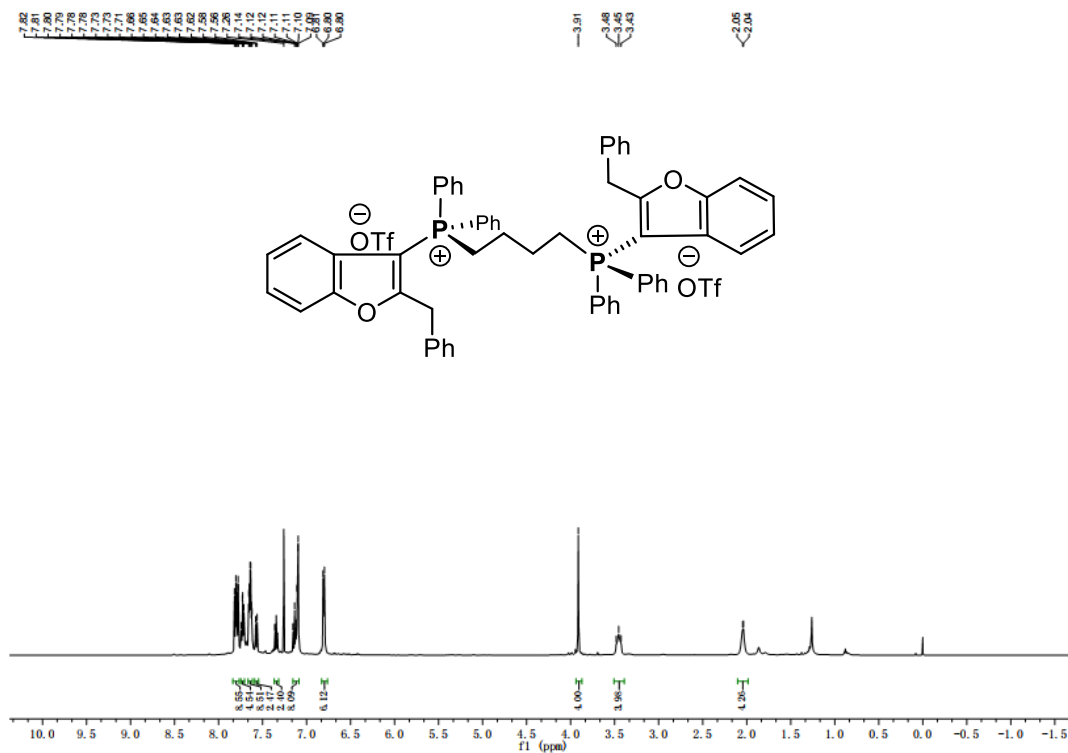

$^{13}\text{C}$  NMR (126 MHz,  $\text{CDCl}_3$ ) of compound **3as**

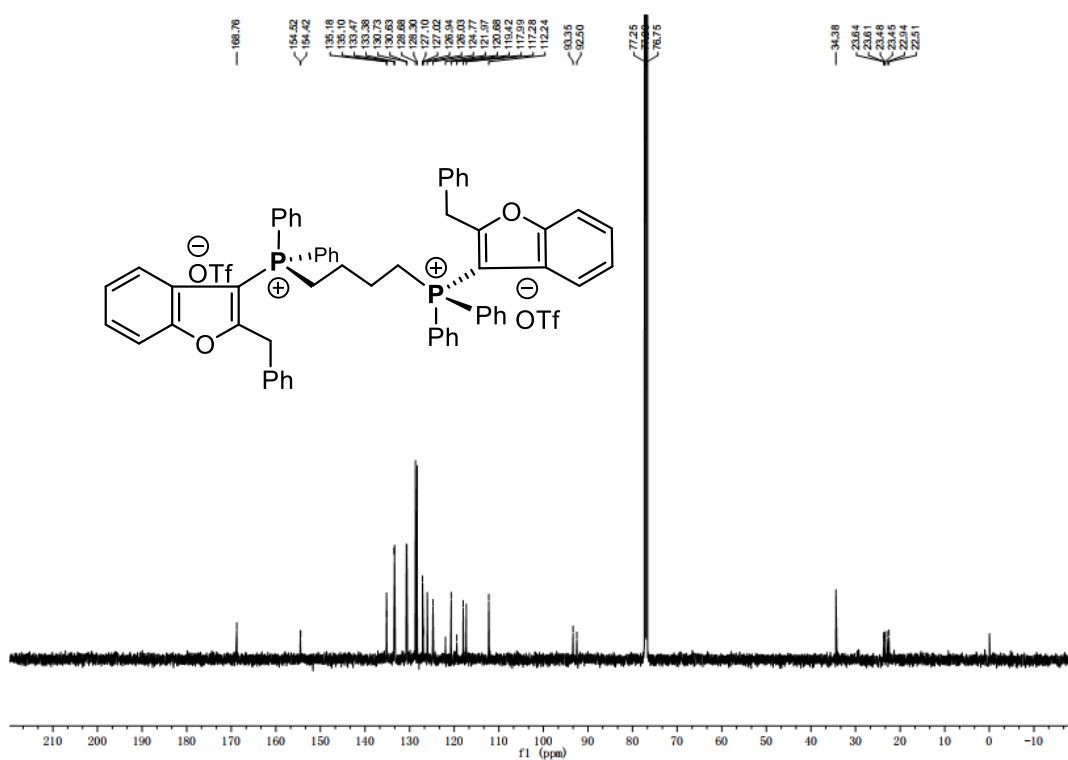

$^{19}\text{F}$  NMR (471 MHz,  $\text{CDCl}_3$ ) of compound **3as**

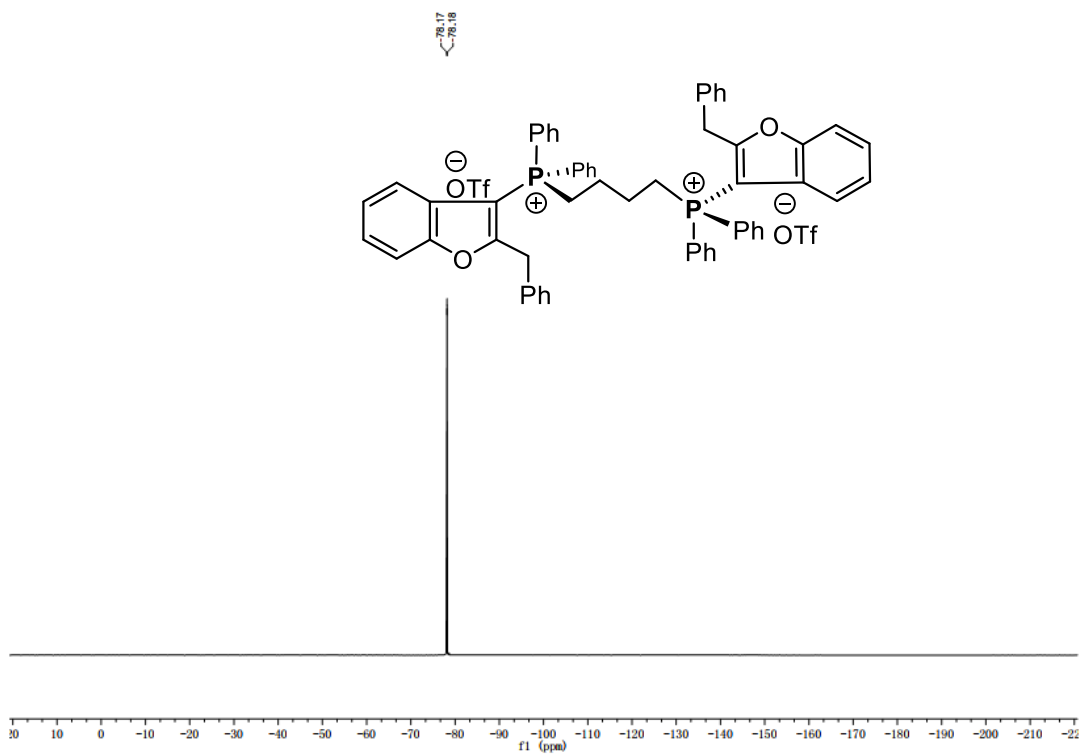



$^{31}\text{P}$  NMR (202 MHz,  $\text{CDCl}_3$ ) of compound **3as**

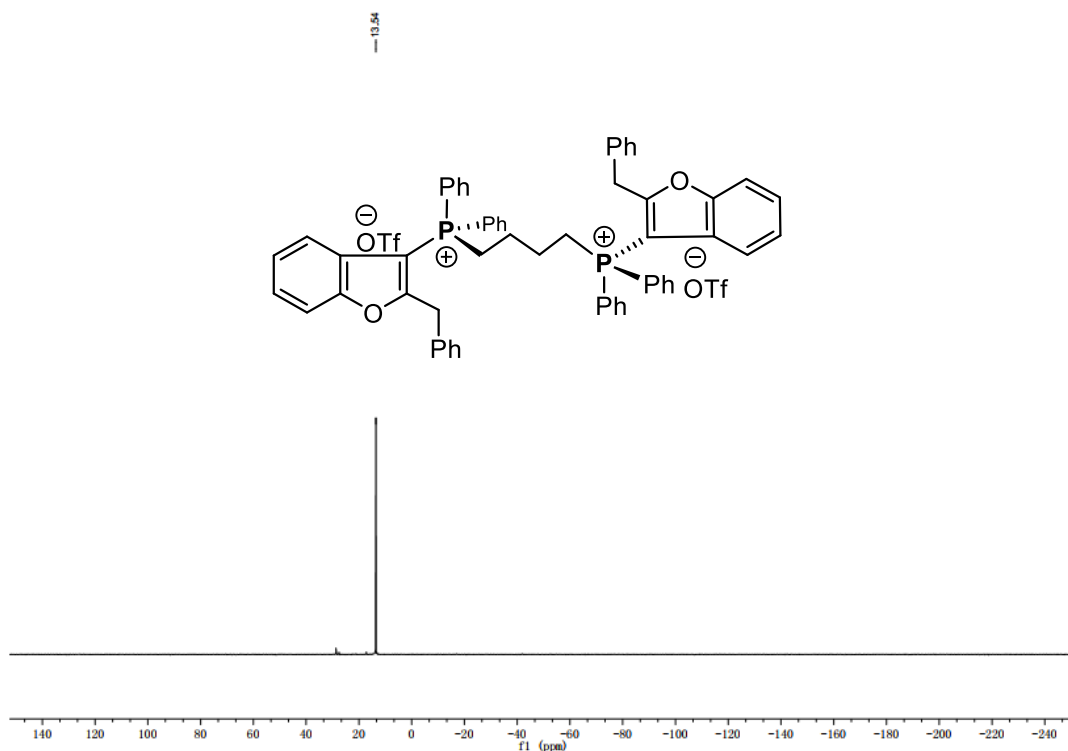

$^1\text{H}$  NMR (500 MHz,  $\text{CDCl}_3$ ) of compound **A**

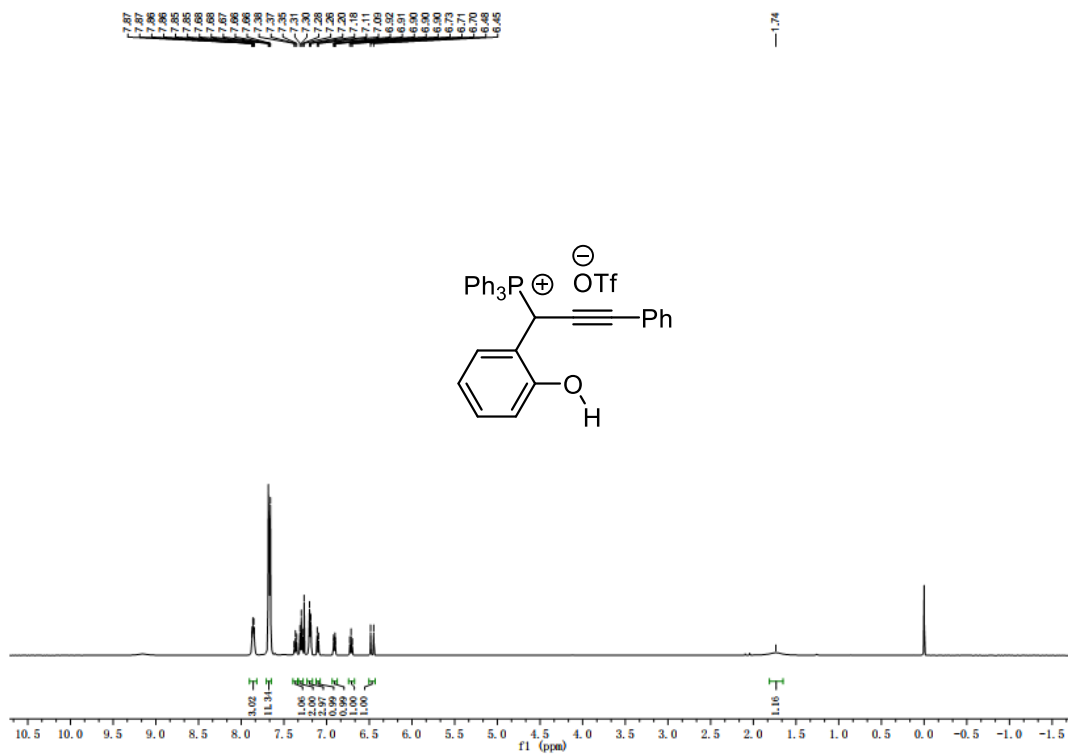

<sup>13</sup>C NMR (126 MHz, CDCl<sub>3</sub>) of compound A

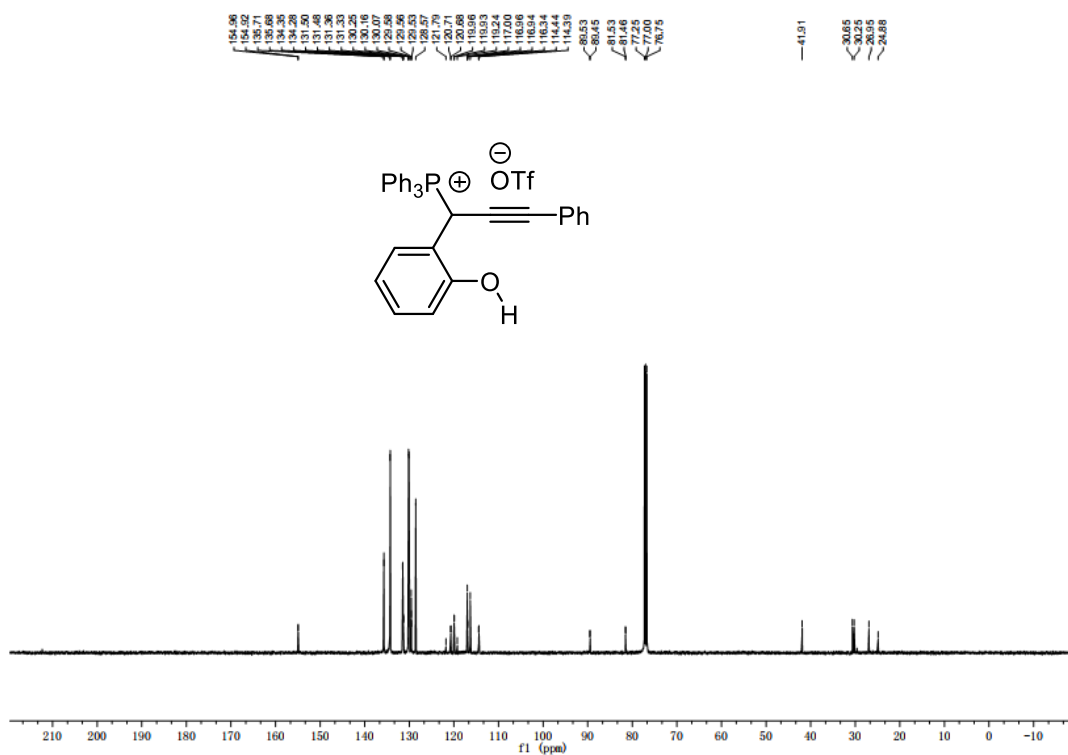

<sup>19</sup>F NMR (471 MHz, CDCl<sub>3</sub>) of compound A

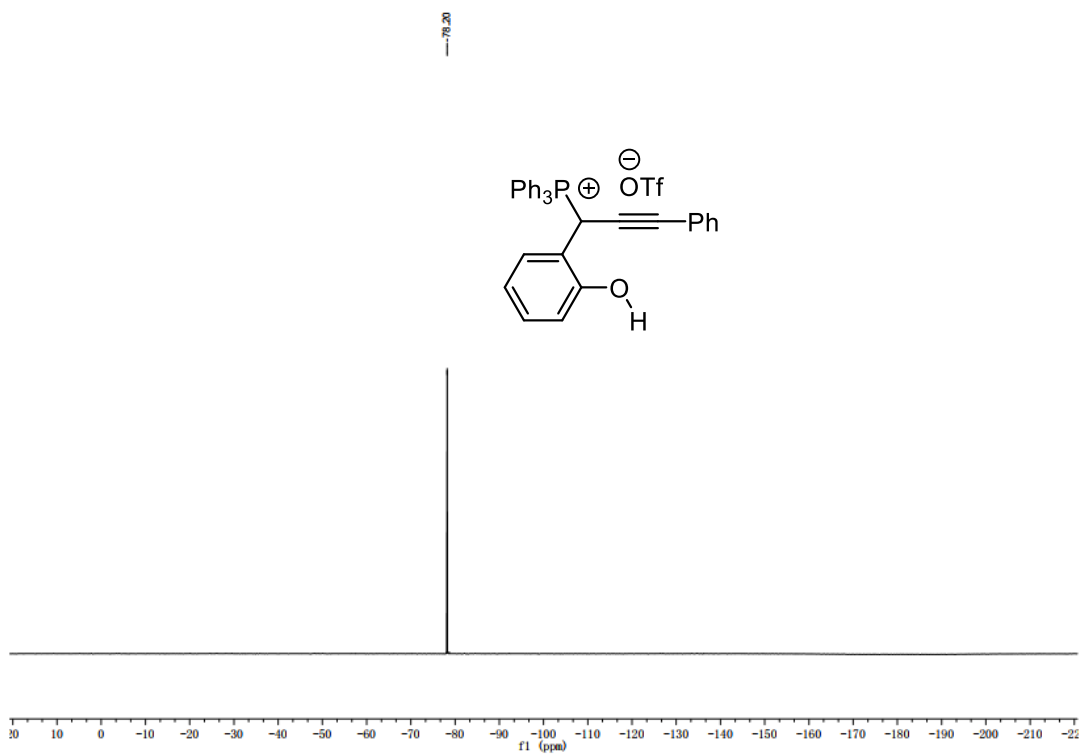

$^{31}\text{P}$  NMR (202 MHz,  $\text{CDCl}_3$ ) of compound **A**

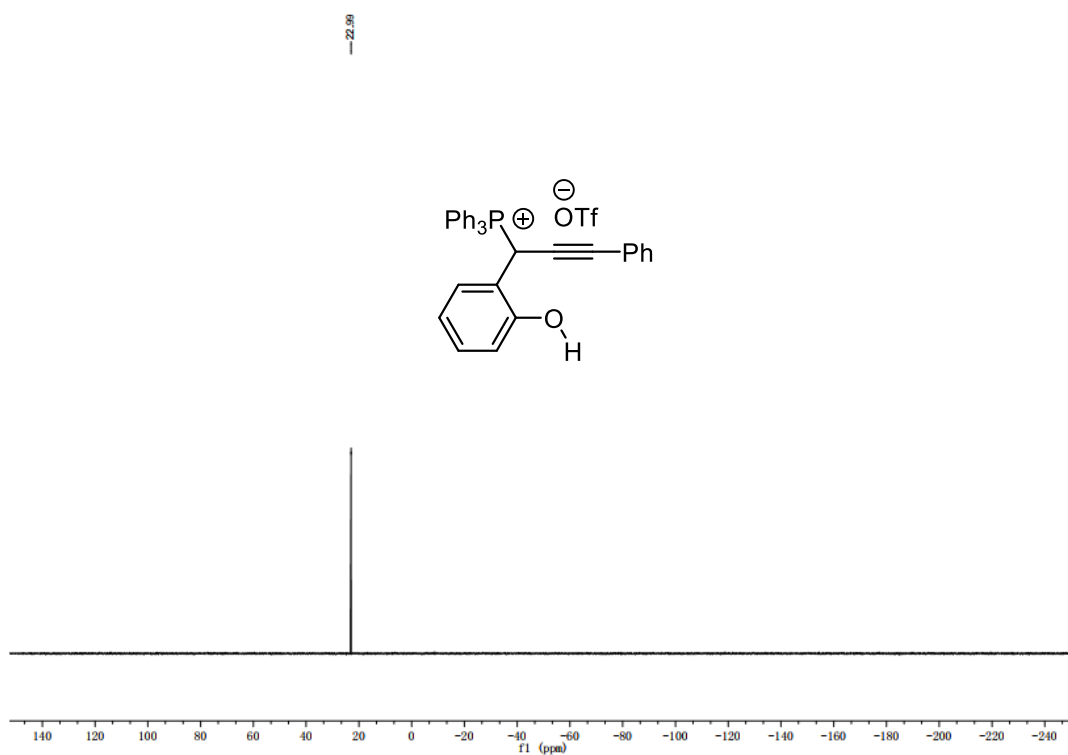

$^1\text{H}$  NMR (500 MHz,  $\text{CDCl}_3$ ) of compound **8a**

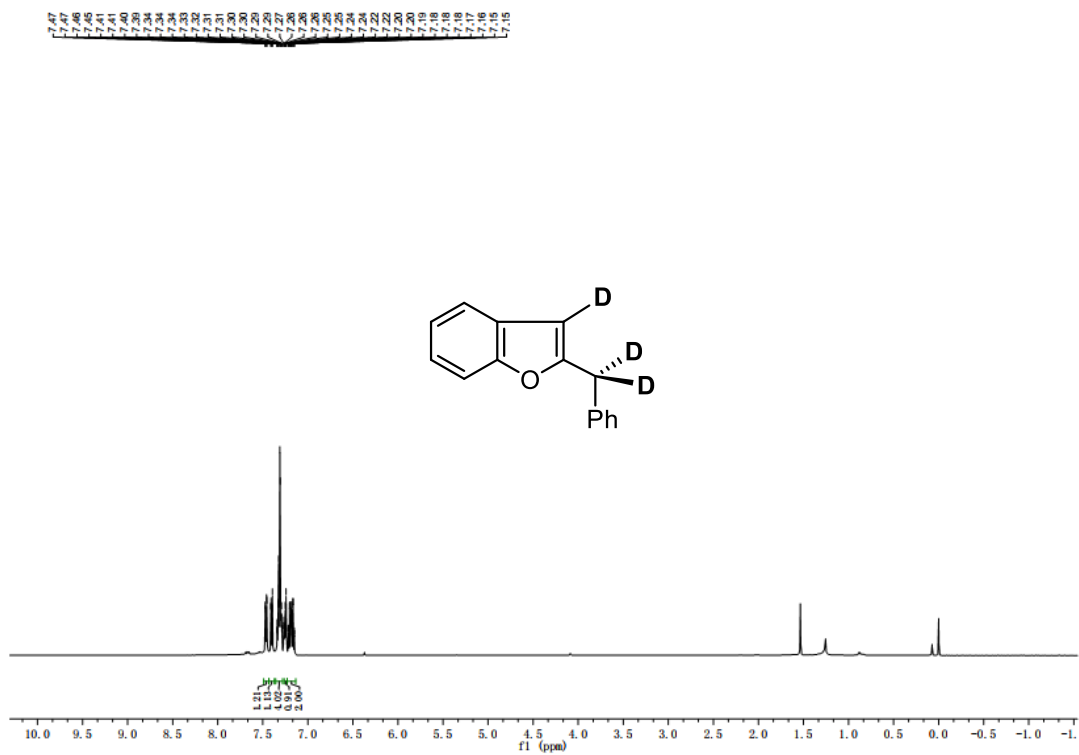

$^{13}\text{C}$  NMR (126 MHz,  $\text{CDCl}_3$ ) of compound **8a**

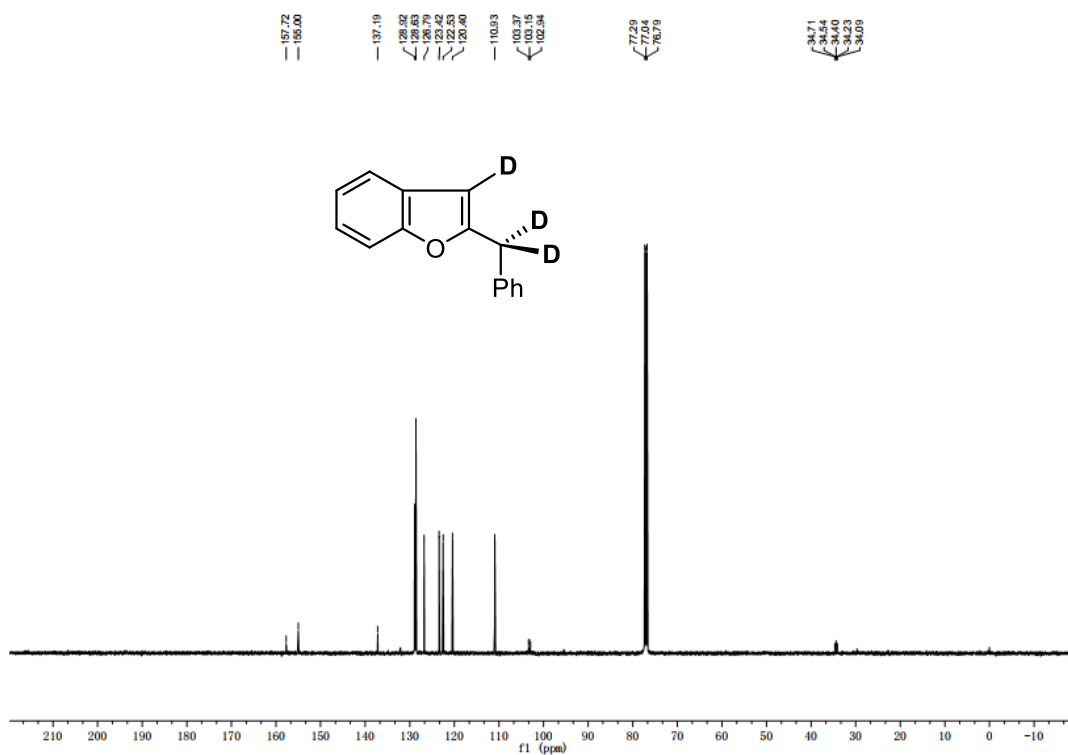

$^1\text{H}$  NMR (500 MHz,  $\text{CDCl}_3$ ) of compound **8b**

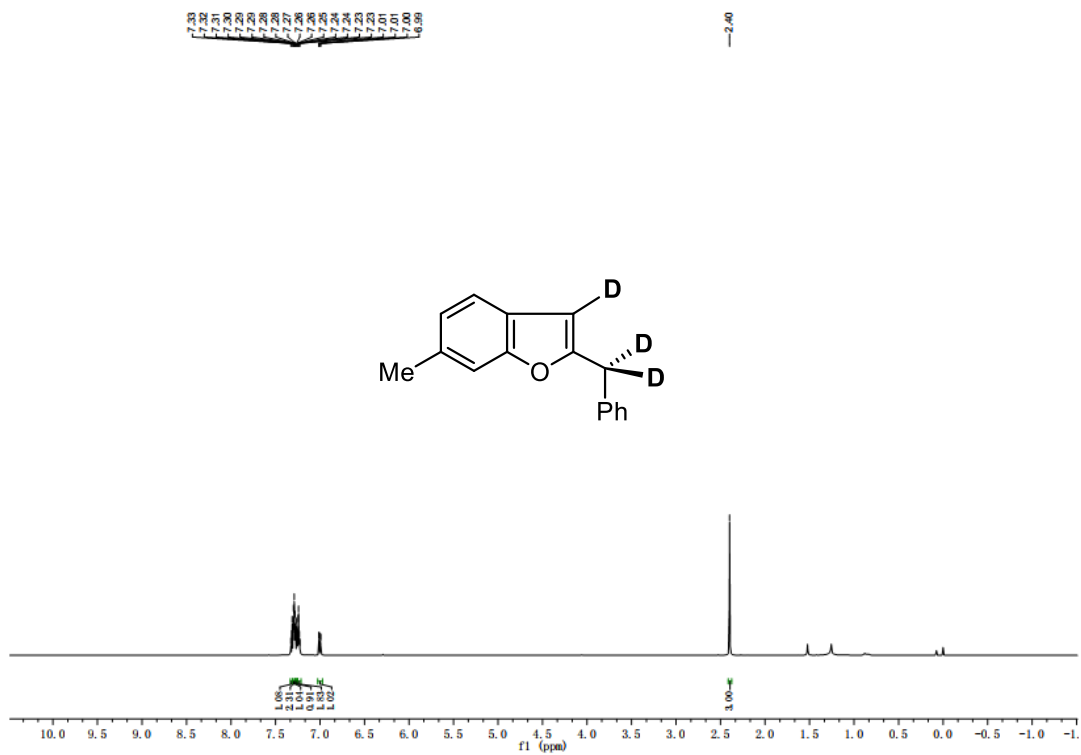

$^{13}\text{C}$  NMR (126 MHz,  $\text{CDCl}_3$ ) of compound **8b**

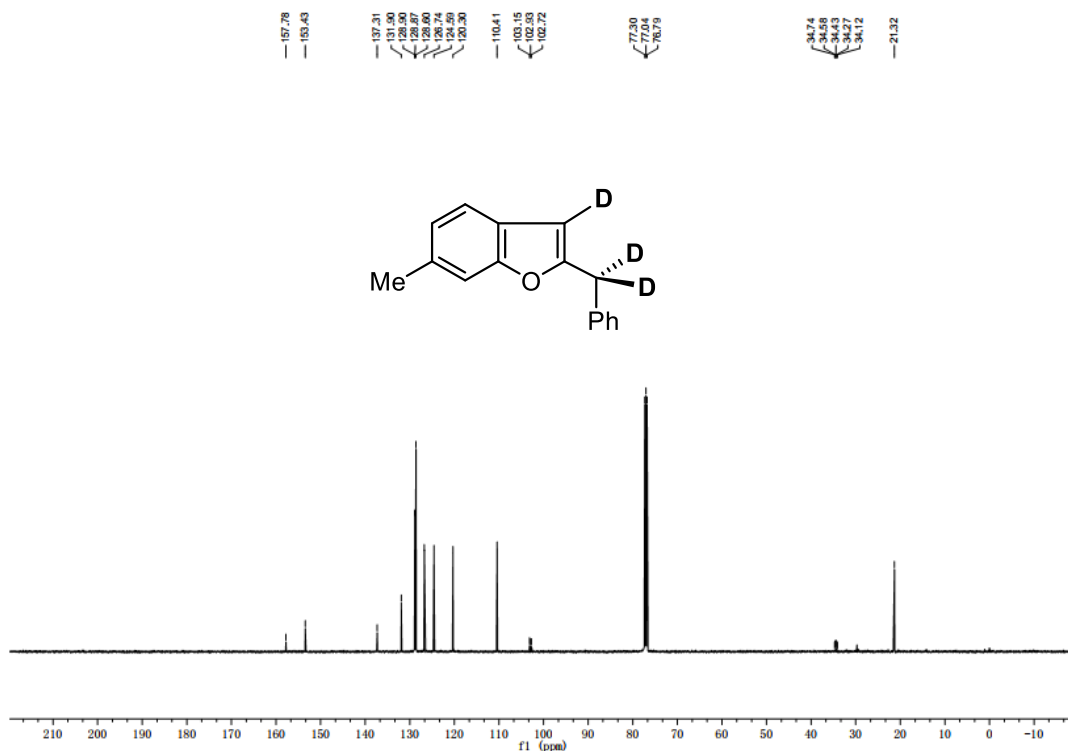

$^1\text{H}$  NMR (500 MHz,  $\text{CDCl}_3$ ) of compound **8c**

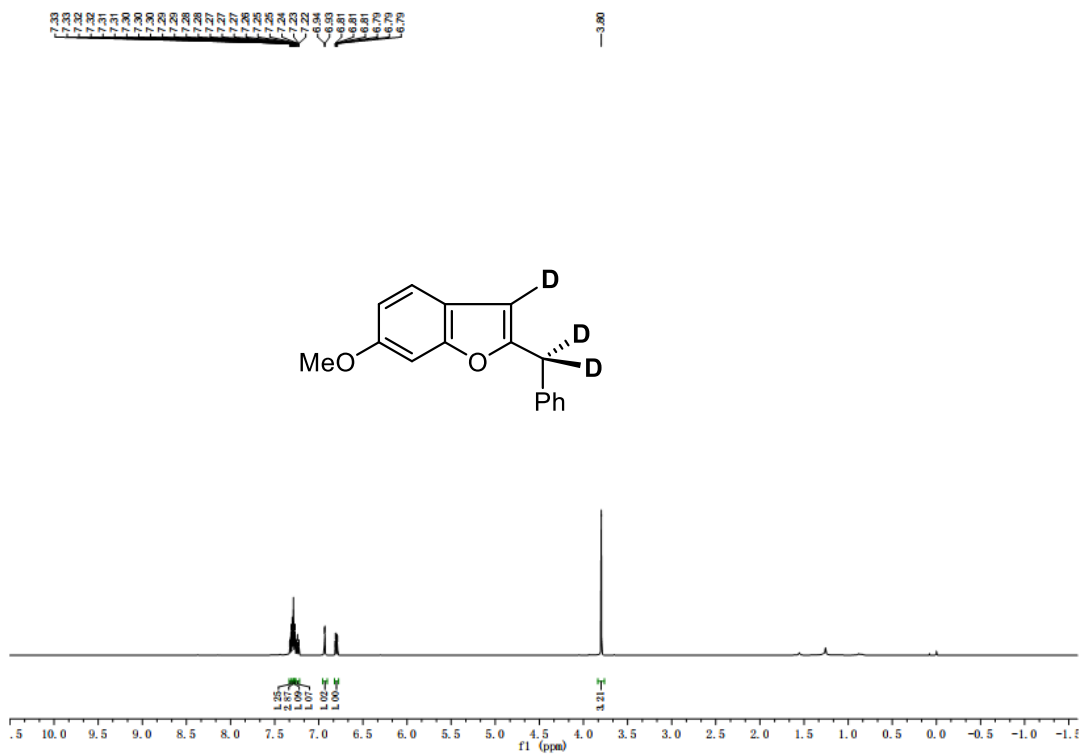

$^{13}\text{C}$  NMR (126 MHz,  $\text{CDCl}_3$ ) of compound **8c**

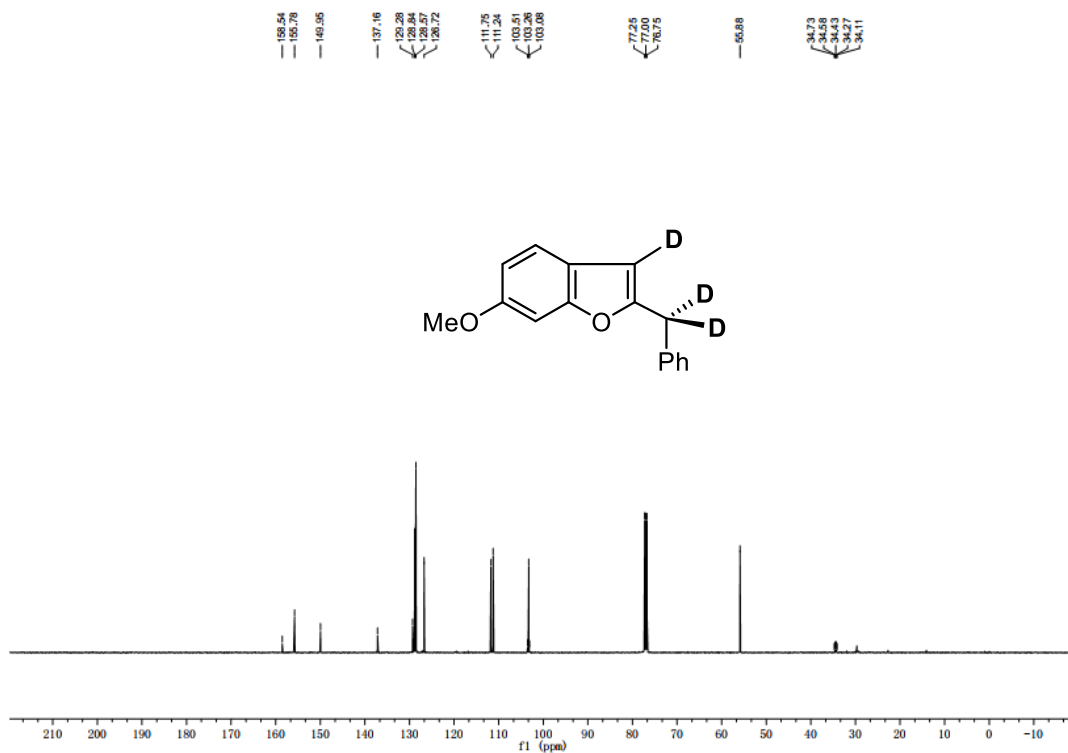

$^1\text{H}$  NMR (500 MHz,  $\text{CDCl}_3$ ) of compound **8d**

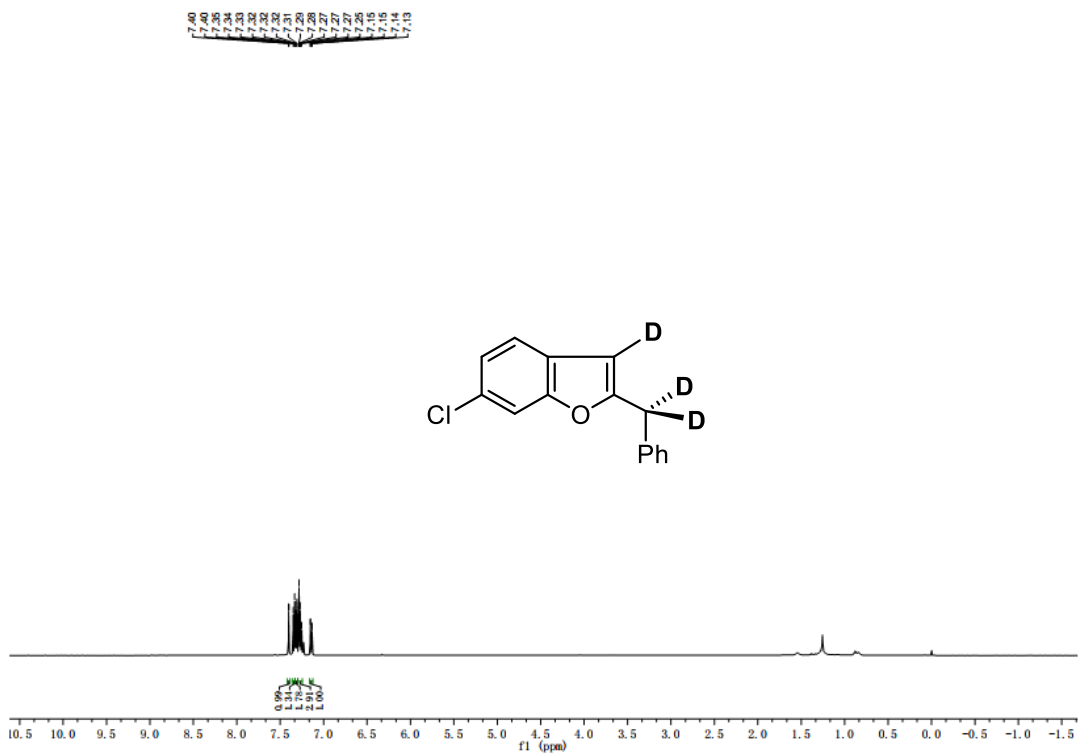

$^{13}\text{C}$  NMR (126 MHz,  $\text{CDCl}_3$ ) of compound **8d**

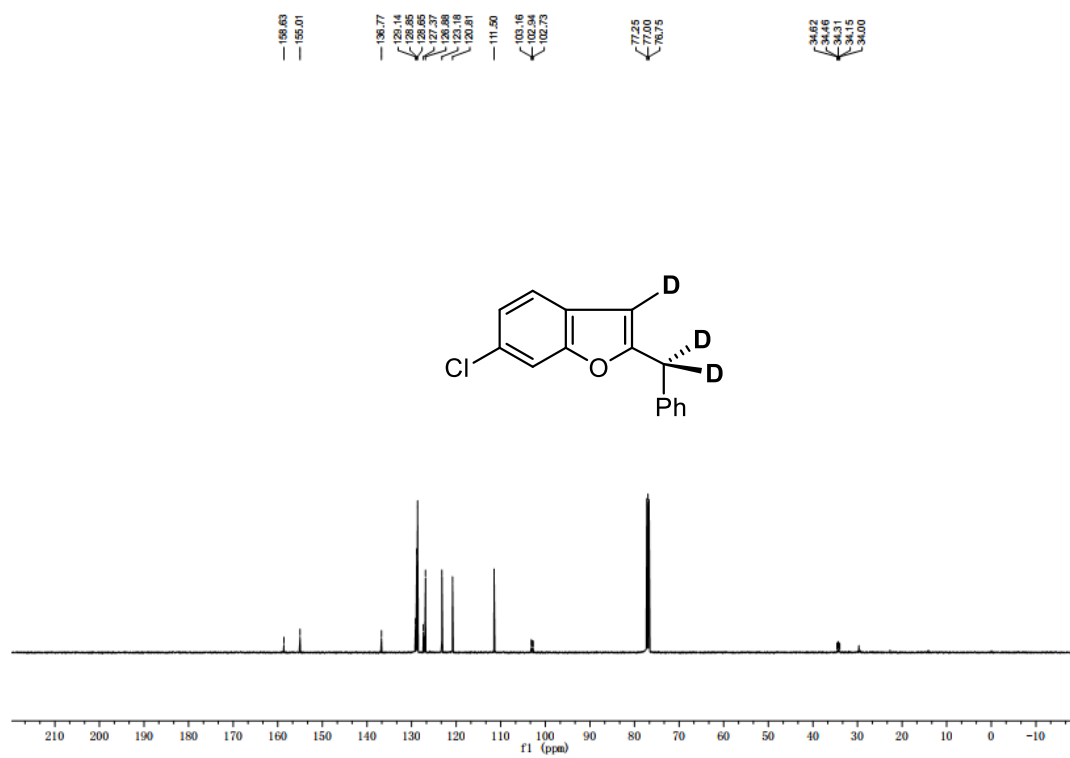

$^1\text{H}$  NMR (500 MHz,  $\text{CDCl}_3$ ) of compound **8e**

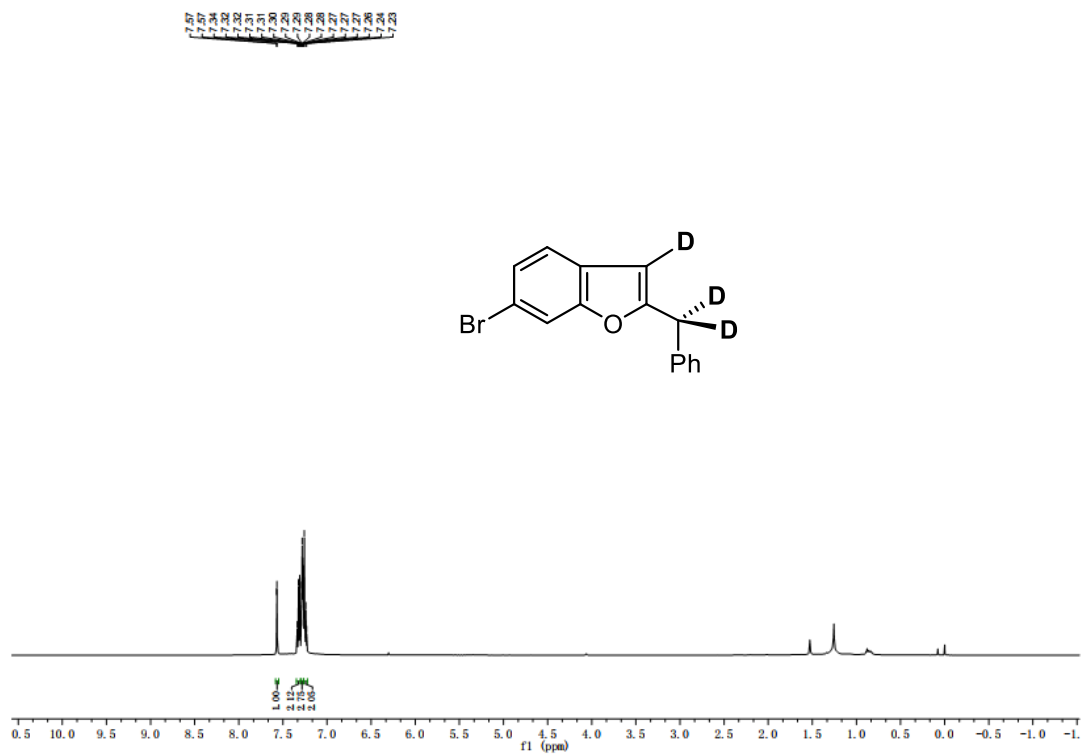





$^{13}\text{C}$  NMR (126 MHz,  $\text{CDCl}_3$ ) of compound **8f**

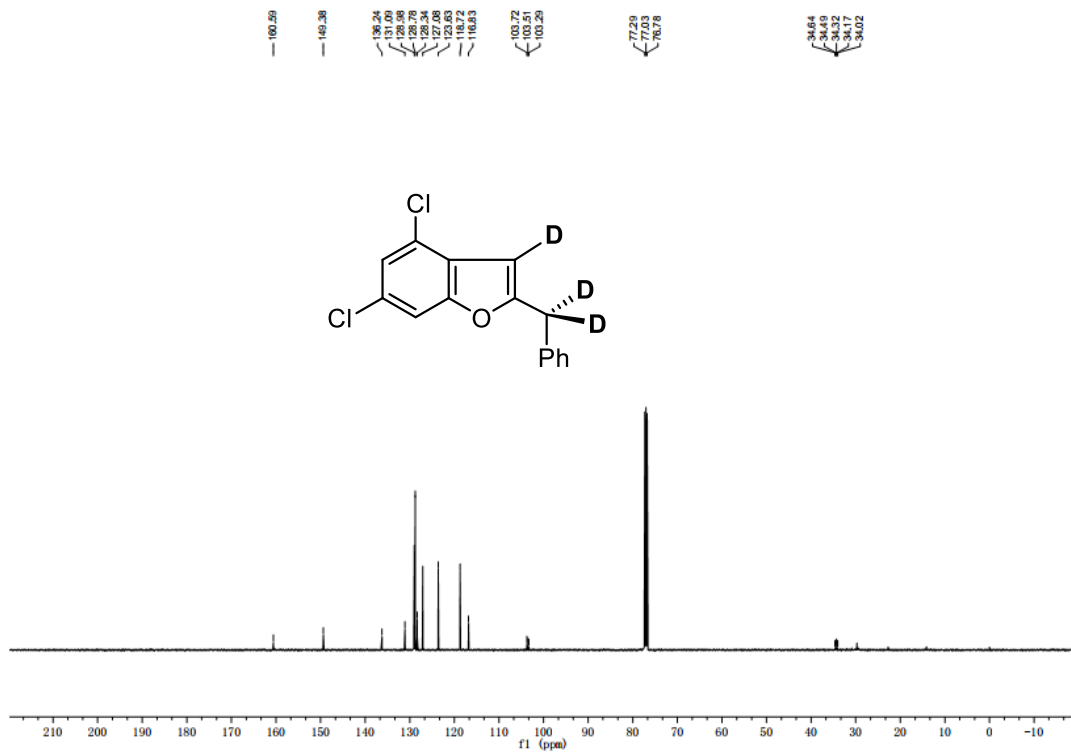

$^1\text{H}$  NMR (500 MHz,  $\text{CDCl}_3$ ) of compound **8g**

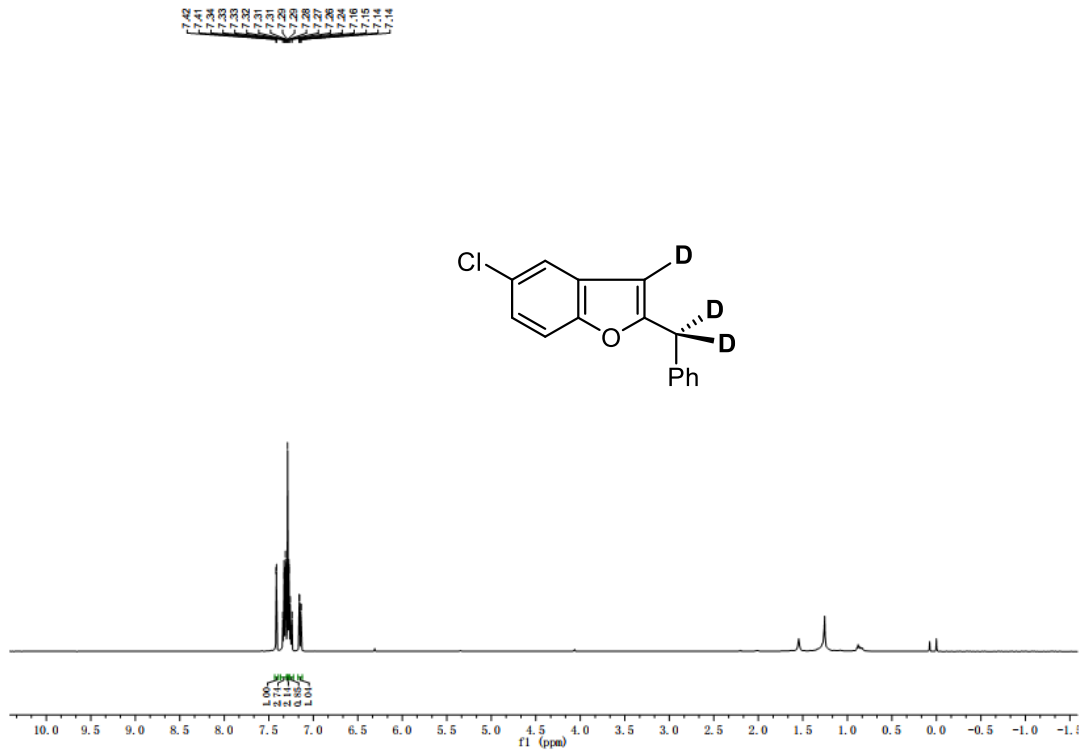



$^{13}\text{C}$  NMR (126 MHz,  $\text{CDCl}_3$ ) of compound **8h**

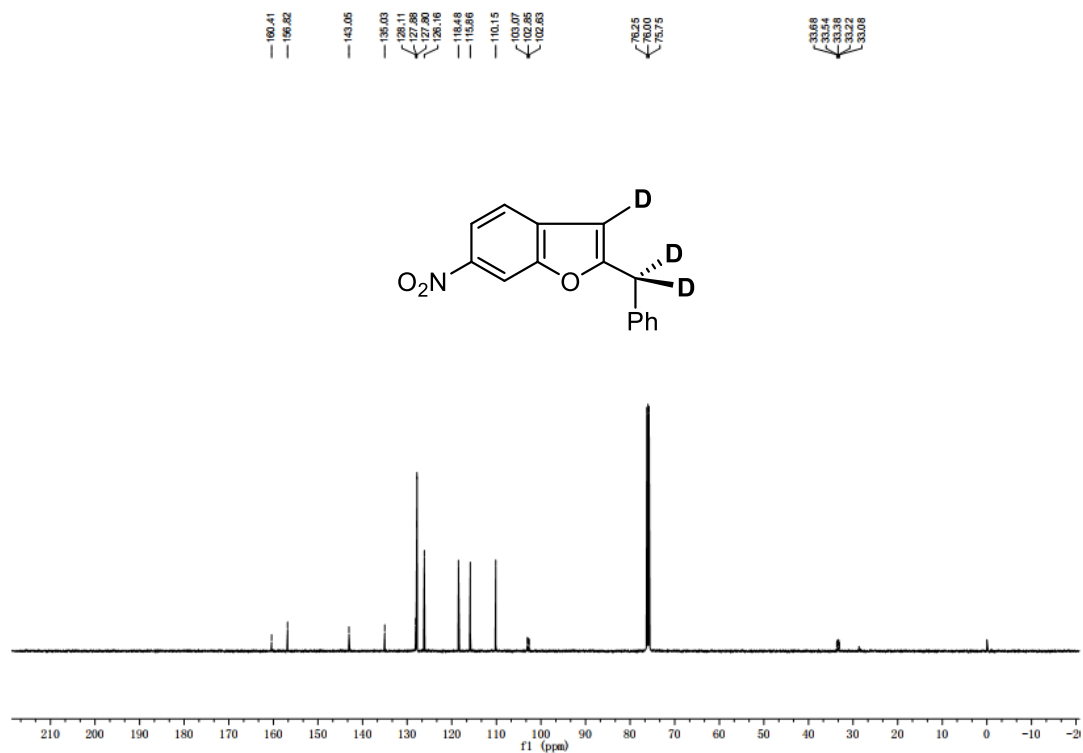

$^1\text{H}$  NMR (500 MHz,  $\text{CDCl}_3$ ) of compound **8i**

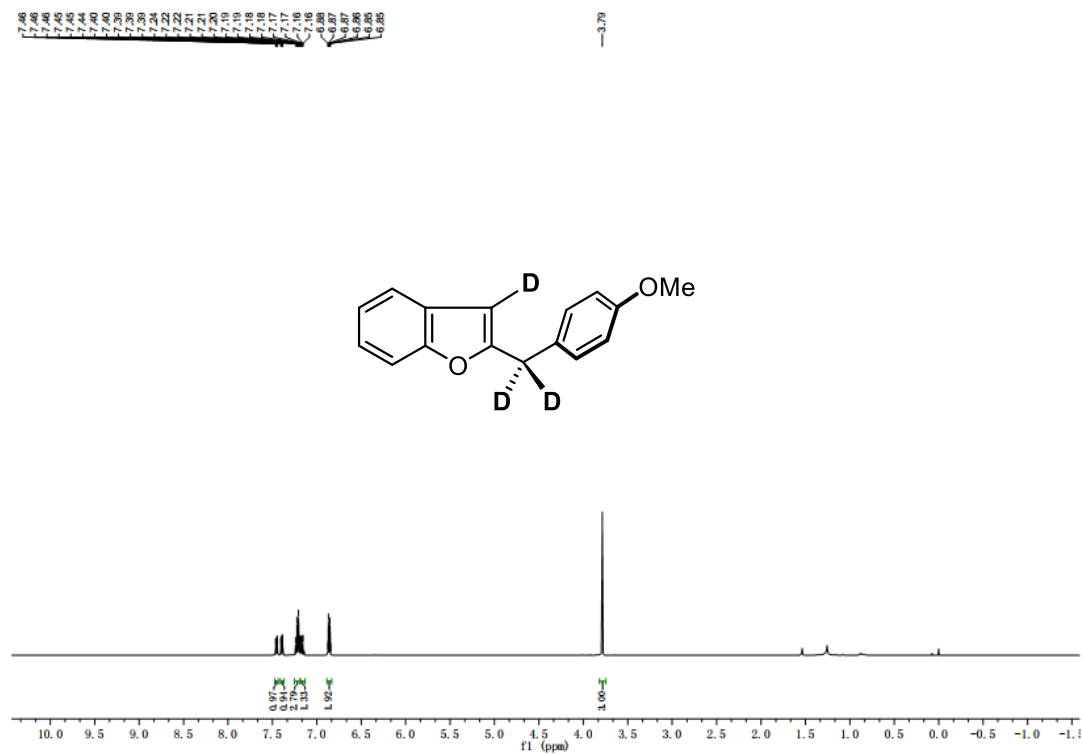

$^{13}\text{C}$  NMR (126 MHz,  $\text{CDCl}_3$ ) of compound **8i**

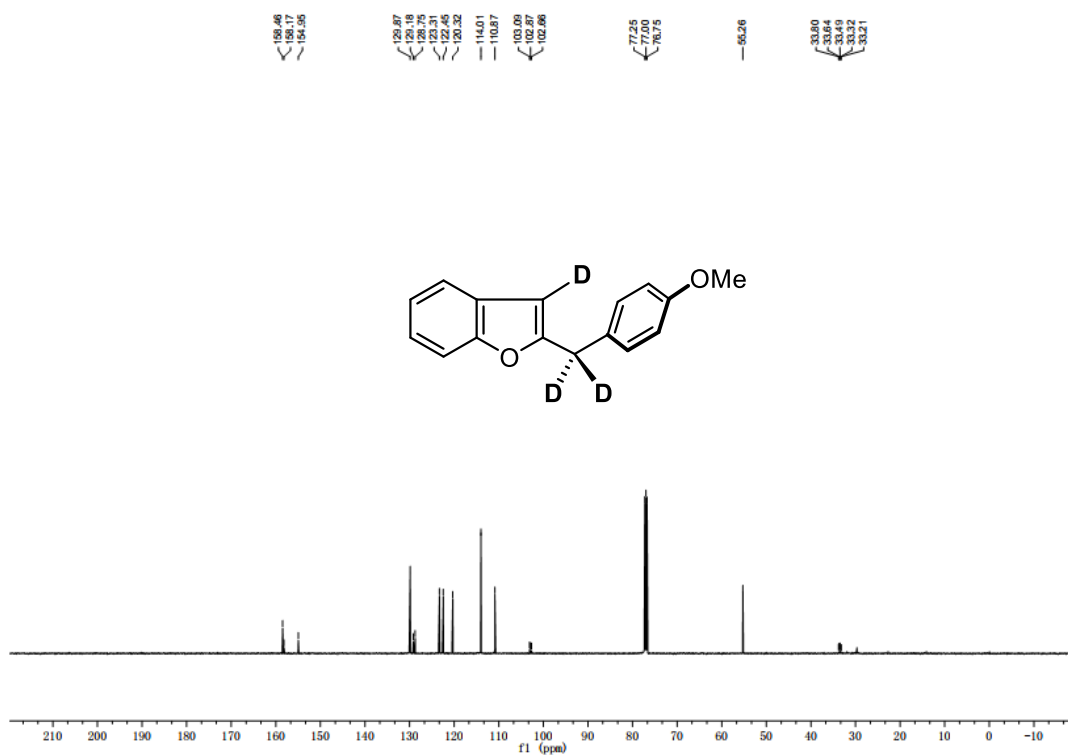

$^{13}\text{C}$  NMR (126 MHz,  $\text{CDCl}_3$ ) of compound **8j**

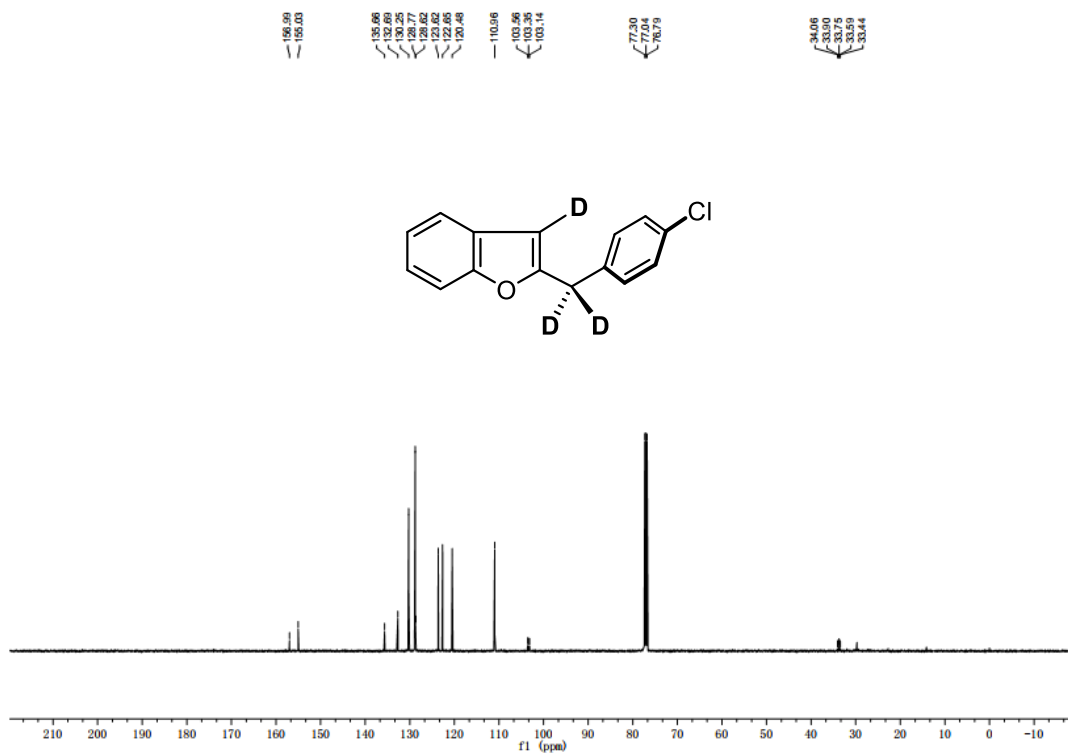

$^1\text{H}$  NMR (500 MHz,  $\text{CDCl}_3$ ) of compound **8k**

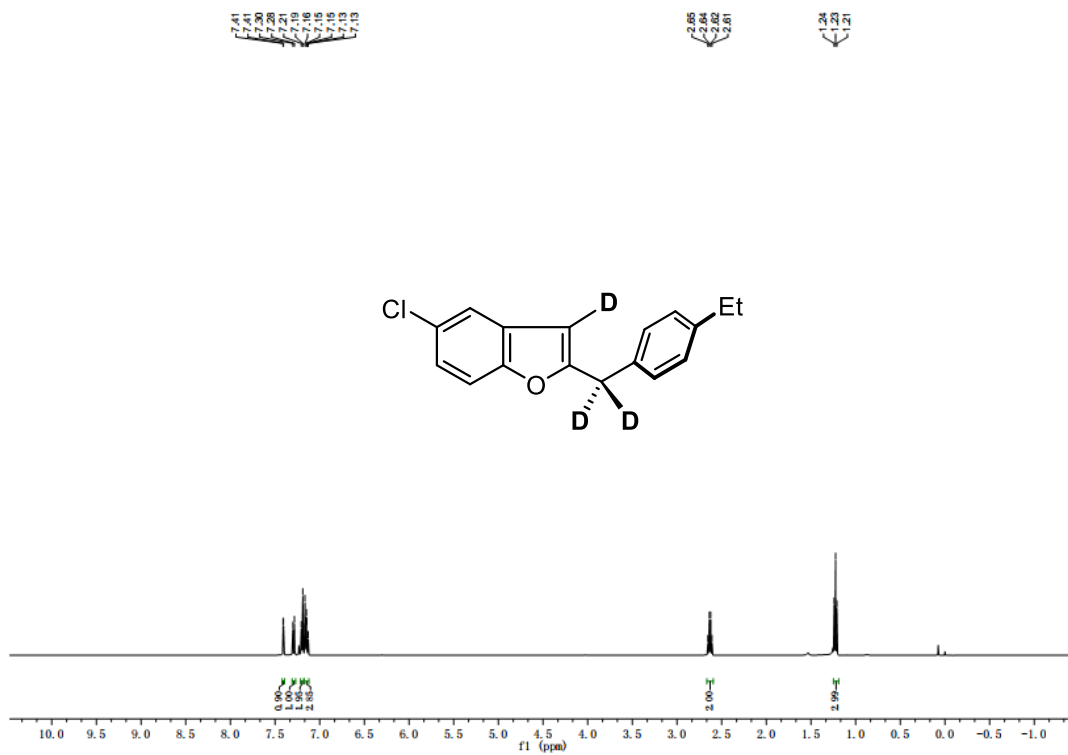

$^{13}\text{C}$  NMR (126 MHz,  $\text{CDCl}_3$ ) of compound **8k**

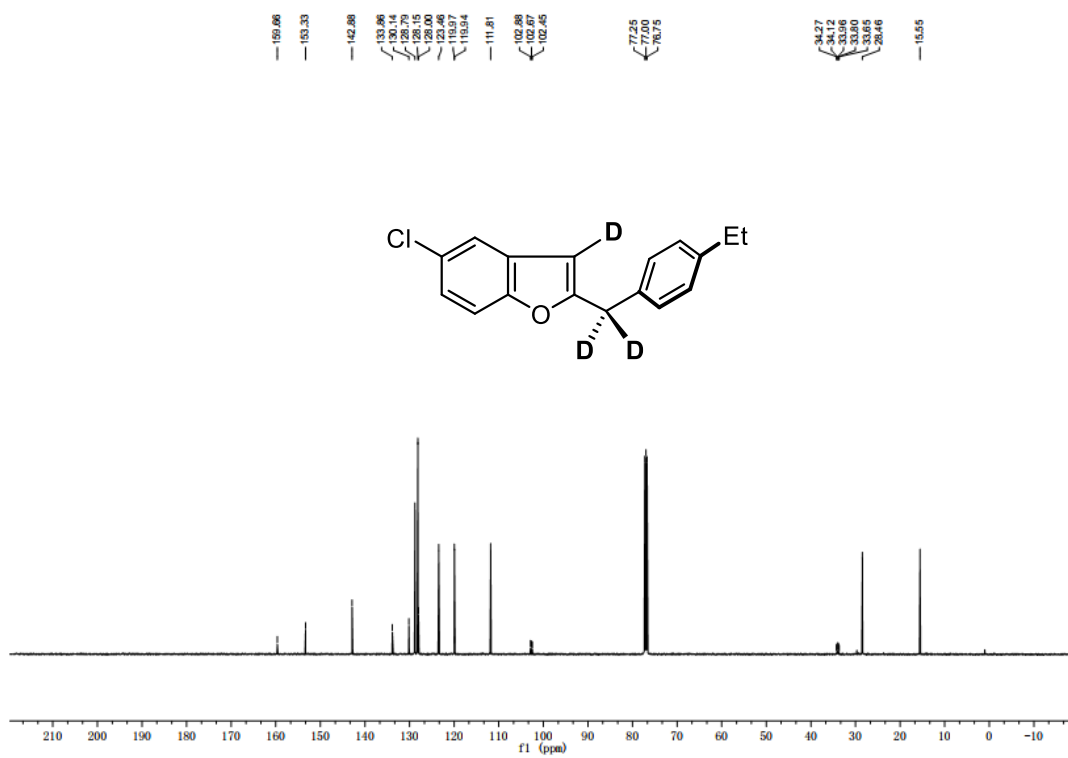

Supplement: d2cc06994f1.pdf [file d2cc06994f1.pdf]
